# Supplementary material for: Temporal Dynamics Dominates Microbiome and Resistome Assembly Despite Tetracycline Pressure in a Germfree Lettuce Model
Source: Research Square preprint supplement (doi:10.21203/rs.3.rs-8401048/v1), 2025-12-24
Supplement: Supplementary file 1 [file 28bdbbc62c8774d320d56843.xlsx]

## Sheet: Sheet1
Samples	Types_Parts(T123C)	Types_Parts(TC)	Detailed ARG subtypes	ARG types	ARG subtypes	Taxa	Taxa_Subtypes	Taxa_types
sW1GLCR1	GLCR	GLCR	ceoB	multidrug	CEOB	Burkholderiaceae	Burkholderiaceae|ceoB	Burkholderiaceae|multidrug
sW1GLCR1	GLCR	GLCR	ADC-22	beta-lactam	ADC-22	Moraxellaceae	Moraxellaceae|ADC-22	Moraxellaceae|beta-lactam
sW1GLCR1	GLCR	GLCR	rphA	rifamycin	RPHA	Pseudonocardiaceae	Pseudonocardiaceae|rphA	Pseudonocardiaceae|rifamycin
sW1GLCR1	GLCR	GLCR	multidrug_ABC_transporter	multidrug	ABC TRANSPORTER	Moraxellaceae	Moraxellaceae|multidrug_ABC_transporter	Moraxellaceae|multidrug
sW1GLCR1	GLCR	GLCR	bacA	bacitracin	BACA	Boseaceae	Boseaceae|bacA	Boseaceae|bacitracin
sW1GLCR1	GLCR	GLCR	TolC	multidrug	TOLC	Moraxellaceae	Moraxellaceae|TolC	Moraxellaceae|multidrug
sW1GLCR1	GLCR	GLCR	mexN	multidrug	MEXN	Pseudomonadaceae	Pseudomonadaceae|mexN	Pseudomonadaceae|multidrug
sW1GLCR1	GLCR	GLCR	tcmA	tetracenomycin_C	TCMA	Streptomycetaceae	Streptomycetaceae|tcmA	Streptomycetaceae|tetracenomycin_C
sW1GLCR1	GLCR	GLCR	vanR	glycopeptide	VANR	Streptomycetaceae	Streptomycetaceae|vanR	Streptomycetaceae|glycopeptide
sW1GLCR1	GLCR	GLCR	bpeF	multidrug	BPEF	Burkholderiaceae	Burkholderiaceae|bpeF	Burkholderiaceae|multidrug
sW1GLCR1	GLCR	GLCR	bpeF	multidrug	BPEF	Unclassified	Unclassified|bpeF	Unclassified|multidrug
sW1GLCR1	GLCR	GLCR	adeK	multidrug	ADEK	Moraxellaceae	Moraxellaceae|adeK	Moraxellaceae|multidrug
sW1GLCR1	GLCR	GLCR	adeJ	multidrug	ADEJ	Moraxellaceae	Moraxellaceae|adeJ	Moraxellaceae|multidrug
sW1GLCR1	GLCR	GLCR	adeI	multidrug	ADEI	Moraxellaceae	Moraxellaceae|adeI	Moraxellaceae|multidrug
sW1GLCR1	GLCR	GLCR	mexB	multidrug	MEXB	Burkholderiaceae	Burkholderiaceae|mexB	Burkholderiaceae|multidrug
sW1GLCR1	GLCR	GLCR	mexT	multidrug	MEXT	Moraxellaceae	Moraxellaceae|mexT	Moraxellaceae|multidrug
sW1GLCR1	GLCR	GLCR	vanR	glycopeptide	VANR	Streptomycetaceae	Streptomycetaceae|vanR	Streptomycetaceae|glycopeptide
sW1GLCR1	GLCR	GLCR	mexB	multidrug	MEXB	Moraxellaceae	Moraxellaceae|mexB	Moraxellaceae|multidrug
sW1GLCR1	GLCR	GLCR	vanR	glycopeptide	VANR	Streptomycetaceae	Streptomycetaceae|vanR	Streptomycetaceae|glycopeptide
sW1GLCR1	GLCR	GLCR	mexE	multidrug	MEXE	Burkholderiaceae	Burkholderiaceae|mexE	Burkholderiaceae|multidrug
sW1GLCR1	GLCR	GLCR	ceoB	multidrug	CEOB	Burkholderiaceae	Burkholderiaceae|ceoB	Burkholderiaceae|multidrug
sW1GLCR1	GLCR	GLCR	MuxB	multidrug	MUXB	Pseudomonadaceae	Pseudomonadaceae|MuxB	Pseudomonadaceae|multidrug
sW1GLCR1	GLCR	GLCR	MuxC	multidrug	MUXC	Pseudomonadaceae	Pseudomonadaceae|MuxC	Pseudomonadaceae|multidrug
sW1GLCR1	GLCR	GLCR	adeC	multidrug	ADEC	Moraxellaceae	Moraxellaceae|adeC	Moraxellaceae|multidrug
sW1GLCR1	GLCR	GLCR	mexE	multidrug	MEXE	Burkholderiaceae	Burkholderiaceae|mexE	Burkholderiaceae|multidrug
sW1GLCR1	GLCR	GLCR	mexF	multidrug	MEXF	Unclassified	Unclassified|mexF	Unclassified|multidrug
sW1GLCR1	GLCR	GLCR	MuxB	multidrug	MUXB	Burkholderiaceae	Burkholderiaceae|MuxB	Burkholderiaceae|multidrug
sW1GLCR1	GLCR	GLCR	adeI	multidrug	ADEI	Moraxellaceae	Moraxellaceae|adeI	Moraxellaceae|multidrug
sW1GLCR1	GLCR	GLCR	oqxB	multidrug	OQXB	Enterobacteriaceae	Enterobacteriaceae|oqxB	Enterobacteriaceae|multidrug
sW1GLCR1	GLCR	GLCR	mexE	multidrug	MEXE	Moraxellaceae	Moraxellaceae|mexE	Moraxellaceae|multidrug
sW1GLCR1	GLCR	GLCR	bpeF	multidrug	BPEF	Burkholderiaceae	Burkholderiaceae|bpeF	Burkholderiaceae|multidrug
sW1GLCR1	GLCR	GLCR	ceoB	multidrug	CEOB	Burkholderiaceae	Burkholderiaceae|ceoB	Burkholderiaceae|multidrug
sW1GLCR1	GLCR	GLCR	mdfA	multidrug	MDFA	Moraxellaceae	Moraxellaceae|mdfA	Moraxellaceae|multidrug
sW1GLCR1	GLCR	GLCR	bpeF	multidrug	BPEF	Burkholderiaceae	Burkholderiaceae|bpeF	Burkholderiaceae|multidrug
sW1GLCR1	GLCR	GLCR	oqxB	multidrug	OQXB	Yersiniaceae	Yersiniaceae|oqxB	Yersiniaceae|multidrug
sW1GLCR1	GLCR	GLCR	bpeF	multidrug	BPEF	Burkholderiaceae	Burkholderiaceae|bpeF	Burkholderiaceae|multidrug
sW1GLCR1	GLCR	GLCR	RbpA	rifamycin	RBPA	Mycobacteriaceae	Mycobacteriaceae|RbpA	Mycobacteriaceae|rifamycin
sW1GLCR1	GLCR	GLCR	vanR	glycopeptide	VANR	Streptomycetaceae	Streptomycetaceae|vanR	Streptomycetaceae|glycopeptide
sW1GLCR1	GLCR	GLCR	acrB	multidrug	ACRB	Burkholderiaceae	Burkholderiaceae|acrB	Burkholderiaceae|multidrug
sW1GLCR1	GLCR	GLCR	rphA	rifamycin	RPHA	Archangiaceae	Archangiaceae|rphA	Archangiaceae|rifamycin
sW1GLCR1	GLCR	GLCR	mexF	multidrug	MEXF	Rhodanobacteraceae	Rhodanobacteraceae|mexF	Rhodanobacteraceae|multidrug
sW1GLCR1	GLCR	GLCR	bacA	bacitracin	BACA	Burkholderiaceae	Burkholderiaceae|bacA	Burkholderiaceae|bacitracin
sW1GLCR1	GLCR	GLCR	abeS	multidrug	ABES	Moraxellaceae	Moraxellaceae|abeS	Moraxellaceae|multidrug
sW1GLCR1	GLCR	GLCR	mexE	multidrug	MEXE	Moraxellaceae	Moraxellaceae|mexE	Moraxellaceae|multidrug
sW1GLCR1	GLCR	GLCR	bpeF	multidrug	BPEF	Burkholderiaceae	Burkholderiaceae|bpeF	Burkholderiaceae|multidrug
sW1GLCR1	GLCR	GLCR	ADC-18	beta-lactam	ADC-18	Moraxellaceae	Moraxellaceae|ADC-18	Moraxellaceae|beta-lactam
sW1GLCR1	GLCR	GLCR	tcmA	tetracenomycin_C	TCMA	Streptomycetaceae	Streptomycetaceae|tcmA	Streptomycetaceae|tetracenomycin_C
sW1GLCR1	GLCR	GLCR	ceoB	multidrug	CEOB	Burkholderiaceae	Burkholderiaceae|ceoB	Burkholderiaceae|multidrug
sW1GLCR1	GLCR	GLCR	MexK	multidrug	MEXK	Rhodanobacteraceae	Rhodanobacteraceae|MexK	Rhodanobacteraceae|multidrug
sW1GLCR1	GLCR	GLCR	MuxB	multidrug	MUXB	Burkholderiaceae	Burkholderiaceae|MuxB	Burkholderiaceae|multidrug
sW1GLCR1	GLCR	GLCR	mexE	multidrug	MEXE	Burkholderiaceae	Burkholderiaceae|mexE	Burkholderiaceae|multidrug
sW1GLCR1	GLCR	GLCR	multidrug_ABC_transporter	multidrug	ABC TRANSPORTER	Burkholderiaceae	Burkholderiaceae|multidrug_ABC_transporter	Burkholderiaceae|multidrug
sW1GLCR1	GLCR	GLCR	rpoB2	multidrug	RPOB2	Unclassified	Unclassified|rpoB2	Unclassified|multidrug
sW1GLCR1	GLCR	GLCR	opcM	multidrug	OPCM	Burkholderiaceae	Burkholderiaceae|opcM	Burkholderiaceae|multidrug
sW1GLCR1	GLCR	GLCR	ceoB	multidrug	CEOB	Burkholderiaceae	Burkholderiaceae|ceoB	Burkholderiaceae|multidrug
sW1GLCR1	GLCR	GLCR	adeH	multidrug	ADEH	Moraxellaceae	Moraxellaceae|adeH	Moraxellaceae|multidrug
sW1GLCR1	GLCR	GLCR	rphB	rifamycin	RPHB	Bacillaceae	Bacillaceae|rphB	Bacillaceae|rifamycin
sW1GLCR1	GLCR	GLCR	ceoB	multidrug	CEOB	Burkholderiaceae	Burkholderiaceae|ceoB	Burkholderiaceae|multidrug
sW1GLCR1	GLCR	GLCR	adeH	multidrug	ADEH	Moraxellaceae	Moraxellaceae|adeH	Moraxellaceae|multidrug
sW1GLCR1	GLCR	GLCR	adeF	multidrug	ADEF	Moraxellaceae	Moraxellaceae|adeF	Moraxellaceae|multidrug
sW1GLCR1	GLCR	GLCR	mexE	multidrug	MEXE	Moraxellaceae	Moraxellaceae|mexE	Moraxellaceae|multidrug
sW1GLCR1	GLCR	GLCR	rpoB2	multidrug	RPOB2	Mycobacteriaceae	Mycobacteriaceae|rpoB2	Mycobacteriaceae|multidrug
sW1GLCR1	GLCR	GLCR	multidrug_ABC_transporter	multidrug	ABC TRANSPORTER	Streptomycetaceae	Streptomycetaceae|multidrug_ABC_transporter	Streptomycetaceae|multidrug
sW1GLCR1	GLCR	GLCR	mexT	multidrug	MEXT	Pseudomonadaceae	Pseudomonadaceae|mexT	Pseudomonadaceae|multidrug
sW1GLCR1	GLCR	GLCR	bacA	bacitracin	BACA	Pseudomonadaceae	Pseudomonadaceae|bacA	Pseudomonadaceae|bacitracin
sW1GLCR1	GLCR	GLCR	major_facilitator_superfamily_transporter	multidrug	MFST	Moraxellaceae	Moraxellaceae|major_facilitator_superfamily_transporter	Moraxellaceae|multidrug
sW1GLCR1	GLCR	GLCR	aph(3')-I	aminoglycoside	APH(3')-I	Moraxellaceae	Moraxellaceae|aph(3')-I	Moraxellaceae|aminoglycoside
sW1GLCR1	GLCR	GLCR	rphB	rifamycin	RPHB	Chitinophagaceae	Chitinophagaceae|rphB	Chitinophagaceae|rifamycin
sW1GLCR1	GLCR	GLCR	tetA(48)	tetracycline	TETA(48)	Microbacteriaceae	Microbacteriaceae|tetA(48)	Microbacteriaceae|tetracycline
sW1GLCR1	GLCR	GLCR	mexW	multidrug	MEXW	Nitrobacteraceae	Nitrobacteraceae|mexW	Nitrobacteraceae|multidrug
sW1GLCR1	GLCR	GLCR	vanR	glycopeptide	VANR	Streptomycetaceae	Streptomycetaceae|vanR	Streptomycetaceae|glycopeptide
sW1GLCR1	GLCR	GLCR	ceoB	multidrug	CEOB	Burkholderiaceae	Burkholderiaceae|ceoB	Burkholderiaceae|multidrug
sW1GLCR1	GLCR	GLCR	mexE	multidrug	MEXE	Burkholderiaceae	Burkholderiaceae|mexE	Burkholderiaceae|multidrug
sW1GLCR1	GLCR	GLCR	marR	multidrug	MARR	Moraxellaceae	Moraxellaceae|marR	Moraxellaceae|multidrug
sW1GLCR1	GLCR	GLCR	acrB	multidrug	ACRB	Nitrobacteraceae	Nitrobacteraceae|acrB	Nitrobacteraceae|multidrug
sW1GLCR1	GLCR	GLCR	acrB	multidrug	ACRB	Nitrobacteraceae	Nitrobacteraceae|acrB	Nitrobacteraceae|multidrug
sW1GLCR1	GLCR	GLCR	acrB	multidrug	ACRB	Burkholderiaceae	Burkholderiaceae|acrB	Burkholderiaceae|multidrug
sW1GLCR1	GLCR	GLCR	bpeF	multidrug	BPEF	Burkholderiaceae	Burkholderiaceae|bpeF	Burkholderiaceae|multidrug
sW1GLCR1	GLCR	GLCR	oprM	multidrug	OPRM	Pseudomonadaceae	Pseudomonadaceae|oprM	Pseudomonadaceae|multidrug
sW1GLCR1	GLCR	GLCR	mexB	multidrug	MEXB	Pseudomonadaceae	Pseudomonadaceae|mexB	Pseudomonadaceae|multidrug
sW1GLCR1	GLCR	GLCR	mexA	multidrug	MEXA	Pseudomonadaceae	Pseudomonadaceae|mexA	Pseudomonadaceae|multidrug
sW1GLCR1	GLCR	GLCR	vanR	glycopeptide	VANR	Microbacteriaceae	Microbacteriaceae|vanR	Microbacteriaceae|glycopeptide
sW1GLCR1	GLCR	GLCR	rphB	rifamycin	RPHB	Bacillaceae	Bacillaceae|rphB	Bacillaceae|rifamycin
sW1GLCR1	GLCR	GLCR	adeS	multidrug	ADES	Moraxellaceae	Moraxellaceae|adeS	Moraxellaceae|multidrug
sW1GLCR1	GLCR	GLCR	ceoB	multidrug	CEOB	Oxalobacteraceae	Oxalobacteraceae|ceoB	Oxalobacteraceae|multidrug
sW1GLCR1	GLCR	GLCR	bpeF	multidrug	BPEF	Burkholderiaceae	Burkholderiaceae|bpeF	Burkholderiaceae|multidrug
sW1GLCR1	GLCR	GLCR	rosA	fosmidomycin	ROSA	Burkholderiaceae	Burkholderiaceae|rosA	Burkholderiaceae|fosmidomycin
sW1GLCR1	GLCR	GLCR	mdtB	multidrug	MDTB	Rhizobiaceae	Rhizobiaceae|mdtB	Rhizobiaceae|multidrug
sW1GLCR1	GLCR	GLCR	AxyY	multidrug	AXYY	Burkholderiaceae	Burkholderiaceae|AxyY	Burkholderiaceae|multidrug
sW1GLCR1	GLCR	GLCR	multidrug_ABC_transporter	multidrug	ABC TRANSPORTER	Burkholderiaceae	Burkholderiaceae|multidrug_ABC_transporter	Burkholderiaceae|multidrug
sW1GLCR1	GLCR	GLCR	mdtB	multidrug	MDTB	Methylococcaceae	Methylococcaceae|mdtB	Methylococcaceae|multidrug
sW1GLCR1	GLCR	GLCR	mexE	multidrug	MEXE	Burkholderiaceae	Burkholderiaceae|mexE	Burkholderiaceae|multidrug
sW1GLCR1	GLCR	GLCR	bpeF	multidrug	BPEF	Burkholderiaceae	Burkholderiaceae|bpeF	Burkholderiaceae|multidrug
sW1GLCR1	GLCR	GLCR	adeF	multidrug	ADEF	Oxalobacteraceae	Oxalobacteraceae|adeF	Oxalobacteraceae|multidrug
sW1GLCR1	GLCR	GLCR	rphA	rifamycin	RPHA	Nocardiaceae	Nocardiaceae|rphA	Nocardiaceae|rifamycin
sW1GLCR1	GLCR	GLCR	OXA-421	beta-lactam	OXA	Moraxellaceae	Moraxellaceae|OXA	Moraxellaceae|beta-lactam
sW1GLCR1	GLCR	GLCR	mexF	multidrug	MEXF	Rhodanobacteraceae	Rhodanobacteraceae|mexF	Rhodanobacteraceae|multidrug
sW1GLCR1	GLCR	GLCR	acrB	multidrug	ACRB	Unclassified	Unclassified|acrB	Unclassified|multidrug
sW1GLCR1	GLCR	GLCR	vanR	glycopeptide	VANR	Microbacteriaceae	Microbacteriaceae|vanR	Microbacteriaceae|glycopeptide
sW1GLCR1	GLCR	GLCR	acrB	multidrug	ACRB	Burkholderiaceae	Burkholderiaceae|acrB	Burkholderiaceae|multidrug
sW1GLCR1	GLCR	GLCR	adeC	multidrug	ADEC	Moraxellaceae	Moraxellaceae|adeC	Moraxellaceae|multidrug
sW1GLCR1	GLCR	GLCR	bacA	bacitracin	BACA	Comamonadaceae	Comamonadaceae|bacA	Comamonadaceae|bacitracin
sW1GLCR1	GLCR	GLCR	mexW	multidrug	MEXW	Pseudomonadaceae	Pseudomonadaceae|mexW	Pseudomonadaceae|multidrug
sW1GLCR1	GLCR	GLCR	MvaT	multidrug	MVAT	Pseudomonadaceae	Pseudomonadaceae|MvaT	Pseudomonadaceae|multidrug
sW1GLCR1	GLCR	GLCR	metallo-beta-lactamase	beta-lactam	METALLO-BETA-LACTAMASE	Caulobacteraceae	Caulobacteraceae|metallo-beta-lactamase	Caulobacteraceae|beta-lactam
sW1GLCR1	GLCR	GLCR	oqxB	multidrug	OQXB	Alcanivoracaceae	Alcanivoracaceae|oqxB	Alcanivoracaceae|multidrug
sW1GLCR1	GLCR	GLCR	abeM	multidrug	ABEM	Moraxellaceae	Moraxellaceae|abeM	Moraxellaceae|multidrug
sW1GLCR1	GLCR	GLCR	bacA	bacitracin	BACA	Burkholderiaceae	Burkholderiaceae|bacA	Burkholderiaceae|bacitracin
sW1GLCR1	GLCR	GLCR	rpoB2	multidrug	RPOB2	Sphingomonadaceae	Sphingomonadaceae|rpoB2	Sphingomonadaceae|multidrug
sW1GLCR1	GLCR	GLCR	adeS	multidrug	ADES	Moraxellaceae	Moraxellaceae|adeS	Moraxellaceae|multidrug
sW1GLCR1	GLCR	GLCR	adeR	multidrug	ADER	Moraxellaceae	Moraxellaceae|adeR	Moraxellaceae|multidrug
sW1GLCR1	GLCR	GLCR	rphB	rifamycin	RPHB	Spirosomaceae	Spirosomaceae|rphB	Spirosomaceae|rifamycin
sW1GLCR1	GLCR	GLCR	rpoB2	multidrug	RPOB2	Kribbellaceae	Kribbellaceae|rpoB2	Kribbellaceae|multidrug
sW1GLCR1	GLCR	GLCR	ceoB	multidrug	CEOB	Burkholderiaceae	Burkholderiaceae|ceoB	Burkholderiaceae|multidrug
sW1GLCR1	GLCR	GLCR	macA	MLS	MACA	Moraxellaceae	Moraxellaceae|macA	Moraxellaceae|MLS
sW1GLCR1	GLCR	GLCR	oprM	multidrug	OPRM	Moraxellaceae	Moraxellaceae|oprM	Moraxellaceae|multidrug
sW1GLCR1	GLCR	GLCR	bpeF	multidrug	BPEF	Pseudomonadaceae	Pseudomonadaceae|bpeF	Pseudomonadaceae|multidrug
sW1GLCR1	GLCR	GLCR	acrB	multidrug	ACRB	Xanthomonadaceae	Xanthomonadaceae|acrB	Xanthomonadaceae|multidrug
sW1GLCR1	GLCR	GLCR	bacA	bacitracin	BACA	Burkholderiaceae	Burkholderiaceae|bacA	Burkholderiaceae|bacitracin
sW1GLCR1	GLCR	GLCR	mexB	multidrug	MEXB	Moraxellaceae	Moraxellaceae|mexB	Moraxellaceae|multidrug
sW1GLCR1	GLCR	GLCR	ceoB	multidrug	CEOB	Burkholderiaceae	Burkholderiaceae|ceoB	Burkholderiaceae|multidrug
sW1GLCR1	GLCR	GLCR	mexE	multidrug	MEXE	Pseudomonadaceae	Pseudomonadaceae|mexE	Pseudomonadaceae|multidrug
sW1GLCR1	GLCR	GLCR	mexF	multidrug	MEXF	Pseudomonadaceae	Pseudomonadaceae|mexF	Pseudomonadaceae|multidrug
sW1GLCR1	GLCR	GLCR	ceoB	multidrug	CEOB	Burkholderiaceae	Burkholderiaceae|ceoB	Burkholderiaceae|multidrug
sW1GLCR1	GLCR	GLCR	adeB	multidrug	ADEB	Moraxellaceae	Moraxellaceae|adeB	Moraxellaceae|multidrug
sW1GLCR1	GLCR	GLCR	rosA	fosmidomycin	ROSA	Chitinophagaceae	Chitinophagaceae|rosA	Chitinophagaceae|fosmidomycin
sW1GLCR1	GLCR	GLCR	vanI	glycopeptide	VANI	Streptomycetaceae	Streptomycetaceae|vanI	Streptomycetaceae|glycopeptide
sW1GLCR1	GLCR	GLCR	vanX	glycopeptide	VANX	Streptomycetaceae	Streptomycetaceae|vanX	Streptomycetaceae|glycopeptide
sW1GLCR1	GLCR	GLCR	ceoB	multidrug	CEOB	Burkholderiaceae	Burkholderiaceae|ceoB	Burkholderiaceae|multidrug
sW1GLCR1	GLCR	GLCR	oprA	multidrug	OPRA	Burkholderiaceae	Burkholderiaceae|oprA	Burkholderiaceae|multidrug
sW1GLCR1	GLCR	GLCR	mdtB	multidrug	MDTB	Labilitrichaceae	Labilitrichaceae|mdtB	Labilitrichaceae|multidrug
sW1GLCR1	GLCR	GLCR	vanR	glycopeptide	VANR	Streptomycetaceae	Streptomycetaceae|vanR	Streptomycetaceae|glycopeptide
sW1GLCR1	GLCR	GLCR	acrB	multidrug	ACRB	Sphingomonadaceae	Sphingomonadaceae|acrB	Sphingomonadaceae|multidrug
sW1GLCR1	GLCR	GLCR	bacA	bacitracin	BACA	Burkholderiaceae	Burkholderiaceae|bacA	Burkholderiaceae|bacitracin
sW1GLCR1	GLCR	GLCR	rphB	rifamycin	RPHB	Chitinophagaceae	Chitinophagaceae|rphB	Chitinophagaceae|rifamycin
sW1GLCR1	GLCR	GLCR	ceoB	multidrug	CEOB	Burkholderiaceae	Burkholderiaceae|ceoB	Burkholderiaceae|multidrug
sW1GLCR1	GLCR	GLCR	mexB	multidrug	MEXB	Burkholderiaceae	Burkholderiaceae|mexB	Burkholderiaceae|multidrug
sW1GLCR1	GLCR	GLCR	mtrA	multidrug	MTRA	Streptomycetaceae	Streptomycetaceae|mtrA	Streptomycetaceae|multidrug
sW1GLCR1	GLCR	GLCR	mdtL	multidrug	MDTL	Moraxellaceae	Moraxellaceae|mdtL	Moraxellaceae|multidrug
sW1GLCR1	GLCR	GLCR	bacA	bacitracin	BACA	Burkholderiaceae	Burkholderiaceae|bacA	Burkholderiaceae|bacitracin
sW1GLCR1	GLCR	GLCR	oprC	multidrug	OPRC	Burkholderiaceae	Burkholderiaceae|oprC	Burkholderiaceae|multidrug
sW1GLCR1	GLCR	GLCR	oprC	multidrug	OPRC	Burkholderiaceae	Burkholderiaceae|oprC	Burkholderiaceae|multidrug
sW1GLCR1	GLCR	GLCR	mexF	multidrug	MEXF	Alcaligenaceae	Alcaligenaceae|mexF	Alcaligenaceae|multidrug
sW1GLCR1	GLCR	GLCR	emrB	multidrug	EMRB	Moraxellaceae	Moraxellaceae|emrB	Moraxellaceae|multidrug
sW1GLCR1	GLCR	GLCR	mdtB	multidrug	MDTB	Burkholderiaceae	Burkholderiaceae|mdtB	Burkholderiaceae|multidrug
sW1GLCR1	GLCR	GLCR	OpmH	triclosan	OPMH	Pseudomonadaceae	Pseudomonadaceae|OpmH	Pseudomonadaceae|triclosan
sW1GLCR1	GLCR	GLCR	mexF	multidrug	MEXF	Pseudomonadaceae	Pseudomonadaceae|mexF	Pseudomonadaceae|multidrug
sW1GLCR1	GLCR	GLCR	adeF	multidrug	ADEF	Alcaligenaceae	Alcaligenaceae|adeF	Alcaligenaceae|multidrug
sW1GLCR1	GLCR	GLCR	multidrug_ABC_transporter	multidrug	ABC TRANSPORTER	Burkholderiaceae	Burkholderiaceae|multidrug_ABC_transporter	Burkholderiaceae|multidrug
sW1GLCR1	GLCR	GLCR	lsa	MLS	LSA	Paenibacillaceae	Paenibacillaceae|lsa	Paenibacillaceae|MLS
sW1GLCR1	GLCR	GLCR	adeB	multidrug	ADEB	Moraxellaceae	Moraxellaceae|adeB	Moraxellaceae|multidrug
sW1GLCR1	GLCR	GLCR	major_facilitator_superfamily_transporter	multidrug	MFST	Nitrobacteraceae	Nitrobacteraceae|major_facilitator_superfamily_transporter	Nitrobacteraceae|multidrug
sW1GLCR1	GLCR	GLCR	tetR	tetracycline	TETR	Moraxellaceae	Moraxellaceae|tetR	Moraxellaceae|tetracycline
sW1GLCR1	GLCR	GLCR	mdfA	multidrug	MDFA	Moraxellaceae	Moraxellaceae|mdfA	Moraxellaceae|multidrug
sW1GLCR1	GLCR	GLCR	smeE	multidrug	SMEE	Enterobacteriaceae	Enterobacteriaceae|smeE	Enterobacteriaceae|multidrug
sW1GLCR1	GLCR	GLCR	rosA	fosmidomycin	ROSA	Burkholderiaceae	Burkholderiaceae|rosA	Burkholderiaceae|fosmidomycin
sW1GLCR1	GLCR	GLCR	tetB(48)	tetracycline	TETB(48)	Microbacteriaceae	Microbacteriaceae|tetB(48)	Microbacteriaceae|tetracycline
sW1GLCR1	GLCR	GLCR	rphB	rifamycin	RPHB	Chitinophagaceae	Chitinophagaceae|rphB	Chitinophagaceae|rifamycin
sW1GLCR1	GLCR	GLCR	rphA	rifamycin	RPHA	Streptomycetaceae	Streptomycetaceae|rphA	Streptomycetaceae|rifamycin
sW1GLCR1	GLCR	GLCR	MexK	multidrug	MEXK	Pseudomonadaceae	Pseudomonadaceae|MexK	Pseudomonadaceae|multidrug
sW1GLCR1	GLCR	GLCR	mexB	multidrug	MEXB	Pseudomonadaceae	Pseudomonadaceae|mexB	Pseudomonadaceae|multidrug
sW1GLCR1	GLCR	GLCR	mexA	multidrug	MEXA	Pseudomonadaceae	Pseudomonadaceae|mexA	Pseudomonadaceae|multidrug
sW1GLCR1	GLCR	GLCR	bacA	bacitracin	BACA	Alcaligenaceae	Alcaligenaceae|bacA	Alcaligenaceae|bacitracin
sW1GLCR1	GLCR	GLCR	ceoB	multidrug	CEOB	Burkholderiaceae	Burkholderiaceae|ceoB	Burkholderiaceae|multidrug
sW1GLCR1	GLCR	GLCR	rpoB2	multidrug	RPOB2	Streptomycetaceae	Streptomycetaceae|rpoB2	Streptomycetaceae|multidrug
sW1GLCR1	GLCR	GLCR	adeF	multidrug	ADEF	Oxalobacteraceae	Oxalobacteraceae|adeF	Oxalobacteraceae|multidrug
sW1GLCR1	GLCR	GLCR	rpoB2	multidrug	RPOB2	Nocardioidaceae	Nocardioidaceae|rpoB2	Nocardioidaceae|multidrug
sW1GLCR1	GLCR	GLCR	bpeF	multidrug	BPEF	Burkholderiaceae	Burkholderiaceae|bpeF	Burkholderiaceae|multidrug
sW1GLCR1	GLCR	GLCR	ompR	multidrug	OMPR	Moraxellaceae	Moraxellaceae|ompR	Moraxellaceae|multidrug
sW1GLCR1	GLCR	GLCR	rphB	rifamycin	RPHB	Chitinophagaceae	Chitinophagaceae|rphB	Chitinophagaceae|rifamycin
sW1GLCR1	GLCR	GLCR	rpoB2	multidrug	RPOB2	Nitrobacteraceae	Nitrobacteraceae|rpoB2	Nitrobacteraceae|multidrug
sW1GLCR1	GLCR	GLCR	mdtC	multidrug	MDTC	Pseudomonadaceae	Pseudomonadaceae|mdtC	Pseudomonadaceae|multidrug
sW1GLCR1	GLCR	GLCR	acrB	multidrug	ACRB	Enterobacteriaceae	Enterobacteriaceae|acrB	Enterobacteriaceae|multidrug
sW1GLCR1	GLCR	GLCR	acrB	multidrug	ACRB	Sphingomonadaceae	Sphingomonadaceae|acrB	Sphingomonadaceae|multidrug
sW1GLCR1	GLCR	GLCR	adeB	multidrug	ADEB	Moraxellaceae	Moraxellaceae|adeB	Moraxellaceae|multidrug
sW1GLCR1	GLCR	GLCR	bacA	bacitracin	BACA	Burkholderiaceae	Burkholderiaceae|bacA	Burkholderiaceae|bacitracin
sW1GLCR1	GLCR	GLCR	mdtB	multidrug	MDTB	Burkholderiaceae	Burkholderiaceae|mdtB	Burkholderiaceae|multidrug
sW1GLCR1	GLCR	GLCR	rosA	fosmidomycin	ROSA	Archangiaceae	Archangiaceae|rosA	Archangiaceae|fosmidomycin
sW1GLCR1	GLCR	GLCR	oqxB	multidrug	OQXB	Xanthomonadaceae	Xanthomonadaceae|oqxB	Xanthomonadaceae|multidrug
sW1GLCR1	GLCR	GLCR	vanX	glycopeptide	VANX	Streptomycetaceae	Streptomycetaceae|vanX	Streptomycetaceae|glycopeptide
sW1GLCR1	GLCR	GLCR	vanI	glycopeptide	VANI	Streptomycetaceae	Streptomycetaceae|vanI	Streptomycetaceae|glycopeptide
sW1GLCR1	GLCR	GLCR	bacA	bacitracin	BACA	Burkholderiaceae	Burkholderiaceae|bacA	Burkholderiaceae|bacitracin
sW1GLCR1	GLCR	GLCR	bacA	bacitracin	BACA	Burkholderiaceae	Burkholderiaceae|bacA	Burkholderiaceae|bacitracin
sW1GLCR1	GLCR	GLCR	amrB	multidrug	AMRB	Burkholderiaceae	Burkholderiaceae|amrB	Burkholderiaceae|multidrug
sW1GLCR1	GLCR	GLCR	mexX	multidrug	MEXX	Burkholderiaceae	Burkholderiaceae|mexX	Burkholderiaceae|multidrug
sW1GLCR1	GLCR	GLCR	vanR	glycopeptide	VANR	Streptomycetaceae	Streptomycetaceae|vanR	Streptomycetaceae|glycopeptide
sW1GLCR1	GLCR	GLCR	bacA	bacitracin	BACA	Comamonadaceae	Comamonadaceae|bacA	Comamonadaceae|bacitracin
sW1GLCR1	GLCR	GLCR	mexB	multidrug	MEXB	Burkholderiaceae	Burkholderiaceae|mexB	Burkholderiaceae|multidrug
sW1GLCR1	GLCR	GLCR	mexE	multidrug	MEXE	Burkholderiaceae	Burkholderiaceae|mexE	Burkholderiaceae|multidrug
sW1GLCR1	GLCR	GLCR	ceoB	multidrug	CEOB	Rhizobiaceae	Rhizobiaceae|ceoB	Rhizobiaceae|multidrug
sW1GLCR1	GLCR	GLCR	ceoB	multidrug	CEOB	Burkholderiaceae	Burkholderiaceae|ceoB	Burkholderiaceae|multidrug
sW1GLCR1	GLCR	GLCR	aac(3)-VII	aminoglycoside	AAC(3)-VII	Streptomycetaceae	Streptomycetaceae|aac(3)-VII	Streptomycetaceae|aminoglycoside
sW1GLCR1	GLCR	GLCR	rpoB2	multidrug	RPOB2	Mycobacteriaceae	Mycobacteriaceae|rpoB2	Mycobacteriaceae|multidrug
sW1GLCR1	GLCR	GLCR	rphA	rifamycin	RPHA	Streptomycetaceae	Streptomycetaceae|rphA	Streptomycetaceae|rifamycin
sW1GLCR1	GLCR	GLCR	vanS	glycopeptide	VANS	Streptomycetaceae	Streptomycetaceae|vanS	Streptomycetaceae|glycopeptide
sW1GLCR1	GLCR	GLCR	adeF	multidrug	ADEF	Rhizobiaceae	Rhizobiaceae|adeF	Rhizobiaceae|multidrug
sW1GLCR1	GLCR	GLCR	mexF	multidrug	MEXF	Xanthomonadaceae	Xanthomonadaceae|mexF	Xanthomonadaceae|multidrug
sW1GLCR1	GLCR	GLCR	opcM	multidrug	OPCM	Burkholderiaceae	Burkholderiaceae|opcM	Burkholderiaceae|multidrug
sW1GLCR1	GLCR	GLCR	ugd	peptide	UGD	Pseudomonadaceae	Pseudomonadaceae|ugd	Pseudomonadaceae|peptide
sW1GLCR1	GLCR	GLCR	multidrug_ABC_transporter	multidrug	ABC TRANSPORTER	Oxalobacteraceae	Oxalobacteraceae|multidrug_ABC_transporter	Oxalobacteraceae|multidrug
sW1GLCR1	GLCR	GLCR	vanR	glycopeptide	VANR	Nocardiaceae	Nocardiaceae|vanR	Nocardiaceae|glycopeptide
sW1GLCR1	GLCR	GLCR	mexF	multidrug	MEXF	Rhodanobacteraceae	Rhodanobacteraceae|mexF	Rhodanobacteraceae|multidrug
sW1GLCR1	GLCR	GLCR	multidrug_ABC_transporter	multidrug	ABC TRANSPORTER	Streptomycetaceae	Streptomycetaceae|multidrug_ABC_transporter	Streptomycetaceae|multidrug
sW1GLCR1	GLCR	GLCR	mdtB	multidrug	MDTB	Burkholderiaceae	Burkholderiaceae|mdtB	Burkholderiaceae|multidrug
sW1GLCR1	GLCR	GLCR	mexN	multidrug	MEXN	Roseobacteraceae	Roseobacteraceae|mexN	Roseobacteraceae|multidrug
sW1GLCR1	GLCR	GLCR	mexF	multidrug	MEXF	Pseudomonadaceae	Pseudomonadaceae|mexF	Pseudomonadaceae|multidrug
sW1GLCR1	GLCR	GLCR	vanR	glycopeptide	VANR	Pseudonocardiaceae	Pseudonocardiaceae|vanR	Pseudonocardiaceae|glycopeptide
sW1GLCR1	GLCR	GLCR	sul1	sulfonamide	SUL1	Brucellaceae	Brucellaceae|sul1	Brucellaceae|sulfonamide
sW1GLCR1	GLCR	GLCR	adeF	multidrug	ADEF	Pseudomonadaceae	Pseudomonadaceae|adeF	Pseudomonadaceae|multidrug
sW1GLCR1	GLCR	GLCR	ANT(3'')-IIa	aminoglycoside	ANT(3'')-IIA	Moraxellaceae	Moraxellaceae|ANT(3'')-IIa	Moraxellaceae|aminoglycoside
sW1GLCR1	GLCR	GLCR	vanR	glycopeptide	VANR	Ruaniaceae	Ruaniaceae|vanR	Ruaniaceae|glycopeptide
sW1GLCR1	GLCR	GLCR	ceoB	multidrug	CEOB	Rhizobiaceae	Rhizobiaceae|ceoB	Rhizobiaceae|multidrug
sW1GLCR1	GLCR	GLCR	mexF	multidrug	MEXF	Enterobacteriaceae	Enterobacteriaceae|mexF	Enterobacteriaceae|multidrug
sW1GLCR1	GLCR	GLCR	bpeF	multidrug	BPEF	Burkholderiaceae	Burkholderiaceae|bpeF	Burkholderiaceae|multidrug
sW1GLCR1	GLCR	GLCR	otrA	tetracycline	OTRA	Streptomycetaceae	Streptomycetaceae|otrA	Streptomycetaceae|tetracycline
sW1GLCR1	GLCR	GLCR	mdtB	multidrug	MDTB	Unclassified	Unclassified|mdtB	Unclassified|multidrug
sW1GLCR1	GLCR	GLCR	arnA	peptide	ARNA	Pseudomonadaceae	Pseudomonadaceae|arnA	Pseudomonadaceae|peptide
sW1GLCR1	GLCR	GLCR	rpoB2	multidrug	RPOB2	Streptomycetaceae	Streptomycetaceae|rpoB2	Streptomycetaceae|multidrug
sW1GLCR1	GLCR	GLCR	bacA	bacitracin	BACA	Burkholderiaceae	Burkholderiaceae|bacA	Burkholderiaceae|bacitracin
sW1GLCR1	GLCR	GLCR	bpeF	multidrug	BPEF	Burkholderiaceae	Burkholderiaceae|bpeF	Burkholderiaceae|multidrug
sW1GLCR1	GLCR	GLCR	mdtB	multidrug	MDTB	Burkholderiaceae	Burkholderiaceae|mdtB	Burkholderiaceae|multidrug
sW1GLCR1	GLCR	GLCR	oleC	MLS	OLEC	Streptomycetaceae	Streptomycetaceae|oleC	Streptomycetaceae|MLS
sW1GLCR1	GLCR	GLCR	bpeF	multidrug	BPEF	Burkholderiaceae	Burkholderiaceae|bpeF	Burkholderiaceae|multidrug
sW1GLCR1	GLCR	GLCR	oqxB	multidrug	OQXB	Rhizobiaceae	Rhizobiaceae|oqxB	Rhizobiaceae|multidrug
sW1GLCR1	GLCR	GLCR	mexF	multidrug	MEXF	Caulobacteraceae	Caulobacteraceae|mexF	Caulobacteraceae|multidrug
sW1GLCR2	GLCR	GLCR	mexE	multidrug	MEXE	Pseudomonadaceae	Pseudomonadaceae|mexE	Pseudomonadaceae|multidrug
sW1GLCR2	GLCR	GLCR	mexF	multidrug	MEXF	Pseudomonadaceae	Pseudomonadaceae|mexF	Pseudomonadaceae|multidrug
sW1GLCR2	GLCR	GLCR	mexW	multidrug	MEXW	Pseudomonadaceae	Pseudomonadaceae|mexW	Pseudomonadaceae|multidrug
sW1GLCR2	GLCR	GLCR	mexN	multidrug	MEXN	Pseudomonadaceae	Pseudomonadaceae|mexN	Pseudomonadaceae|multidrug
sW1GLCR2	GLCR	GLCR	bpeF	multidrug	BPEF	Burkholderiaceae	Burkholderiaceae|bpeF	Burkholderiaceae|multidrug
sW1GLCR2	GLCR	GLCR	bacA	bacitracin	BACA	Pseudomonadaceae	Pseudomonadaceae|bacA	Pseudomonadaceae|bacitracin
sW1GLCR2	GLCR	GLCR	tetA(48)	tetracycline	TETA(48)	Microbacteriaceae	Microbacteriaceae|tetA(48)	Microbacteriaceae|tetracycline
sW1GLCR2	GLCR	GLCR	MuxB	multidrug	MUXB	Oxalobacteraceae	Oxalobacteraceae|MuxB	Oxalobacteraceae|multidrug
sW1GLCR2	GLCR	GLCR	ompR	multidrug	OMPR	Moraxellaceae	Moraxellaceae|ompR	Moraxellaceae|multidrug
sW1GLCR2	GLCR	GLCR	multidrug_ABC_transporter	multidrug	ABC TRANSPORTER	Streptomycetaceae	Streptomycetaceae|multidrug_ABC_transporter	Streptomycetaceae|multidrug
sW1GLCR2	GLCR	GLCR	mexF	multidrug	MEXF	Rhodanobacteraceae	Rhodanobacteraceae|mexF	Rhodanobacteraceae|multidrug
sW1GLCR2	GLCR	GLCR	mdtB	multidrug	MDTB	Burkholderiaceae	Burkholderiaceae|mdtB	Burkholderiaceae|multidrug
sW1GLCR2	GLCR	GLCR	rpoB2	multidrug	RPOB2	Thermomonosporaceae	Thermomonosporaceae|rpoB2	Thermomonosporaceae|multidrug
sW1GLCR2	GLCR	GLCR	ceoB	multidrug	CEOB	Unclassified	Unclassified|ceoB	Unclassified|multidrug
sW1GLCR2	GLCR	GLCR	rphA	rifamycin	RPHA	Streptomycetaceae	Streptomycetaceae|rphA	Streptomycetaceae|rifamycin
sW1GLCR2	GLCR	GLCR	multidrug_ABC_transporter	multidrug	ABC TRANSPORTER	Moraxellaceae	Moraxellaceae|multidrug_ABC_transporter	Moraxellaceae|multidrug
sW1GLCR2	GLCR	GLCR	TolC	multidrug	TOLC	Moraxellaceae	Moraxellaceae|TolC	Moraxellaceae|multidrug
sW1GLCR2	GLCR	GLCR	mdtK	multidrug	MDTK	Moraxellaceae	Moraxellaceae|mdtK	Moraxellaceae|multidrug
sW1GLCR2	GLCR	GLCR	bpeF	multidrug	BPEF	Burkholderiaceae	Burkholderiaceae|bpeF	Burkholderiaceae|multidrug
sW1GLCR2	GLCR	GLCR	MuxB	multidrug	MUXB	Methylocystaceae	Methylocystaceae|MuxB	Methylocystaceae|multidrug
sW1GLCR2	GLCR	GLCR	MexK	multidrug	MEXK	Moraxellaceae	Moraxellaceae|MexK	Moraxellaceae|multidrug
sW1GLCR2	GLCR	GLCR	tetR	tetracycline	TETR	Moraxellaceae	Moraxellaceae|tetR	Moraxellaceae|tetracycline
sW1GLCR2	GLCR	GLCR	adeJ	multidrug	ADEJ	Moraxellaceae	Moraxellaceae|adeJ	Moraxellaceae|multidrug
sW1GLCR2	GLCR	GLCR	oleC	MLS	OLEC	Streptomycetaceae	Streptomycetaceae|oleC	Streptomycetaceae|MLS
sW1GLCR2	GLCR	GLCR	bpeF	multidrug	BPEF	Phyllobacteriaceae	Phyllobacteriaceae|bpeF	Phyllobacteriaceae|multidrug
sW1GLCR2	GLCR	GLCR	adeF	multidrug	ADEF	Pseudomonadaceae	Pseudomonadaceae|adeF	Pseudomonadaceae|multidrug
sW1GLCR2	GLCR	GLCR	oprM	multidrug	OPRM	Moraxellaceae	Moraxellaceae|oprM	Moraxellaceae|multidrug
sW1GLCR2	GLCR	GLCR	mexF	multidrug	MEXF	Oxalobacteraceae	Oxalobacteraceae|mexF	Oxalobacteraceae|multidrug
sW1GLCR2	GLCR	GLCR	acrB	multidrug	ACRB	Burkholderiaceae	Burkholderiaceae|acrB	Burkholderiaceae|multidrug
sW1GLCR2	GLCR	GLCR	MuxB	multidrug	MUXB	Pseudomonadaceae	Pseudomonadaceae|MuxB	Pseudomonadaceae|multidrug
sW1GLCR2	GLCR	GLCR	rosA	fosmidomycin	ROSA	Burkholderiaceae	Burkholderiaceae|rosA	Burkholderiaceae|fosmidomycin
sW1GLCR2	GLCR	GLCR	ompR	multidrug	OMPR	Moraxellaceae	Moraxellaceae|ompR	Moraxellaceae|multidrug
sW1GLCR2	GLCR	GLCR	MexK	multidrug	MEXK	Pseudomonadaceae	Pseudomonadaceae|MexK	Pseudomonadaceae|multidrug
sW1GLCR2	GLCR	GLCR	mexX	multidrug	MEXX	Burkholderiaceae	Burkholderiaceae|mexX	Burkholderiaceae|multidrug
sW1GLCR2	GLCR	GLCR	oprA	multidrug	OPRA	Burkholderiaceae	Burkholderiaceae|oprA	Burkholderiaceae|multidrug
sW1GLCR2	GLCR	GLCR	adeJ	multidrug	ADEJ	Moraxellaceae	Moraxellaceae|adeJ	Moraxellaceae|multidrug
sW1GLCR2	GLCR	GLCR	MuxB	multidrug	MUXB	Pseudomonadaceae	Pseudomonadaceae|MuxB	Pseudomonadaceae|multidrug
sW1GLCR2	GLCR	GLCR	MuxC	multidrug	MUXC	Pseudomonadaceae	Pseudomonadaceae|MuxC	Pseudomonadaceae|multidrug
sW1GLCR2	GLCR	GLCR	acrB	multidrug	ACRB	Burkholderiaceae	Burkholderiaceae|acrB	Burkholderiaceae|multidrug
sW1GLCR2	GLCR	GLCR	mexE	multidrug	MEXE	Burkholderiaceae	Burkholderiaceae|mexE	Burkholderiaceae|multidrug
sW1GLCR2	GLCR	GLCR	emrB	multidrug	EMRB	Moraxellaceae	Moraxellaceae|emrB	Moraxellaceae|multidrug
sW1GLCR2	GLCR	GLCR	adeJ	multidrug	ADEJ	Moraxellaceae	Moraxellaceae|adeJ	Moraxellaceae|multidrug
sW1GLCR2	GLCR	GLCR	mexB	multidrug	MEXB	Moraxellaceae	Moraxellaceae|mexB	Moraxellaceae|multidrug
sW1GLCR2	GLCR	GLCR	bpeF	multidrug	BPEF	Rhizobiaceae	Rhizobiaceae|bpeF	Rhizobiaceae|multidrug
sW1GLCR2	GLCR	GLCR	macA	MLS	MACA	Moraxellaceae	Moraxellaceae|macA	Moraxellaceae|MLS
sW1GLCR2	GLCR	GLCR	MvaT	multidrug	MVAT	Pseudomonadaceae	Pseudomonadaceae|MvaT	Pseudomonadaceae|multidrug
sW1GLCR2	GLCR	GLCR	major_facilitator_superfamily_transporter	multidrug	MFST	Moraxellaceae	Moraxellaceae|major_facilitator_superfamily_transporter	Moraxellaceae|multidrug
sW1GLCR2	GLCR	GLCR	acrB	multidrug	ACRB	Rhodocyclaceae	Rhodocyclaceae|acrB	Rhodocyclaceae|multidrug
sW1GLCR2	GLCR	GLCR	adeB	multidrug	ADEB	Moraxellaceae	Moraxellaceae|adeB	Moraxellaceae|multidrug
sW1GLCR2	GLCR	GLCR	mexT	multidrug	MEXT	Moraxellaceae	Moraxellaceae|mexT	Moraxellaceae|multidrug
sW1GLCR2	GLCR	GLCR	rpoB2	multidrug	RPOB2	Nocardiaceae	Nocardiaceae|rpoB2	Nocardiaceae|multidrug
sW1GLCR2	GLCR	GLCR	tcmA	tetracenomycin_C	TCMA	Streptomycetaceae	Streptomycetaceae|tcmA	Streptomycetaceae|tetracenomycin_C
sW1GLCR2	GLCR	GLCR	macA	MLS	MACA	Moraxellaceae	Moraxellaceae|macA	Moraxellaceae|MLS
sW1GLCR2	GLCR	GLCR	otrA	tetracycline	OTRA	Streptomycetaceae	Streptomycetaceae|otrA	Streptomycetaceae|tetracycline
sW1GLCR2	GLCR	GLCR	oprM	multidrug	OPRM	Moraxellaceae	Moraxellaceae|oprM	Moraxellaceae|multidrug
sW1GLCR2	GLCR	GLCR	mdfA	multidrug	MDFA	Moraxellaceae	Moraxellaceae|mdfA	Moraxellaceae|multidrug
sW1GLCR2	GLCR	GLCR	bpeF	multidrug	BPEF	Burkholderiaceae	Burkholderiaceae|bpeF	Burkholderiaceae|multidrug
sW1GLCR2	GLCR	GLCR	mexB	multidrug	MEXB	Pseudomonadaceae	Pseudomonadaceae|mexB	Pseudomonadaceae|multidrug
sW1GLCR2	GLCR	GLCR	mexA	multidrug	MEXA	Pseudomonadaceae	Pseudomonadaceae|mexA	Pseudomonadaceae|multidrug
sW1GLCR2	GLCR	GLCR	ceoB	multidrug	CEOB	Burkholderiaceae	Burkholderiaceae|ceoB	Burkholderiaceae|multidrug
sW1GLCR2	GLCR	GLCR	ceoB	multidrug	CEOB	Burkholderiaceae	Burkholderiaceae|ceoB	Burkholderiaceae|multidrug
sW1GLCR2	GLCR	GLCR	mexE	multidrug	MEXE	Burkholderiaceae	Burkholderiaceae|mexE	Burkholderiaceae|multidrug
sW1GLCR2	GLCR	GLCR	TolC	multidrug	TOLC	Moraxellaceae	Moraxellaceae|TolC	Moraxellaceae|multidrug
sW1GLCR2	GLCR	GLCR	mexF	multidrug	MEXF	Unclassified	Unclassified|mexF	Unclassified|multidrug
sW1GLCR2	GLCR	GLCR	bacA	bacitracin	BACA	Burkholderiaceae	Burkholderiaceae|bacA	Burkholderiaceae|bacitracin
sW1GLCR2	GLCR	GLCR	oqxB	multidrug	OQXB	Xanthomonadaceae	Xanthomonadaceae|oqxB	Xanthomonadaceae|multidrug
sW1GLCR2	GLCR	GLCR	abeM	multidrug	ABEM	Moraxellaceae	Moraxellaceae|abeM	Moraxellaceae|multidrug
sW1GLCR2	GLCR	GLCR	aph(3')-I	aminoglycoside	APH(3')-I	Moraxellaceae	Moraxellaceae|aph(3')-I	Moraxellaceae|aminoglycoside
sW1GLCR2	GLCR	GLCR	mexF	multidrug	MEXF	Unclassified	Unclassified|mexF	Unclassified|multidrug
sW1GLCR2	GLCR	GLCR	adeF	multidrug	ADEF	Enterobacteriaceae	Enterobacteriaceae|adeF	Enterobacteriaceae|multidrug
sW1GLCR2	GLCR	GLCR	adeB	multidrug	ADEB	Moraxellaceae	Moraxellaceae|adeB	Moraxellaceae|multidrug
sW1GLCR2	GLCR	GLCR	mtrA	multidrug	MTRA	Mycobacteriaceae	Mycobacteriaceae|mtrA	Mycobacteriaceae|multidrug
sW1GLCR2	GLCR	GLCR	bacA	bacitracin	BACA	Burkholderiaceae	Burkholderiaceae|bacA	Burkholderiaceae|bacitracin
sW1GLCR2	GLCR	GLCR	bpeF	multidrug	BPEF	Burkholderiaceae	Burkholderiaceae|bpeF	Burkholderiaceae|multidrug
sW1GLCR2	GLCR	GLCR	tetB(48)	tetracycline	TETB(48)	Unclassified	Unclassified|tetB(48)	Unclassified|tetracycline
sW1GLCR2	GLCR	GLCR	mdtB	multidrug	MDTB	Pseudomonadaceae	Pseudomonadaceae|mdtB	Pseudomonadaceae|multidrug
sW1GLCR2	GLCR	GLCR	mexE	multidrug	MEXE	Burkholderiaceae	Burkholderiaceae|mexE	Burkholderiaceae|multidrug
sW1GLCR2	GLCR	GLCR	ceoB	multidrug	CEOB	Burkholderiaceae	Burkholderiaceae|ceoB	Burkholderiaceae|multidrug
sW1GLCR2	GLCR	GLCR	mtrA	multidrug	MTRA	Streptomycetaceae	Streptomycetaceae|mtrA	Streptomycetaceae|multidrug
sW1GLCR2	GLCR	GLCR	MuxB	multidrug	MUXB	Nitrobacteraceae	Nitrobacteraceae|MuxB	Nitrobacteraceae|multidrug
sW1GLCR2	GLCR	GLCR	MuxB	multidrug	MUXB	Burkholderiaceae	Burkholderiaceae|MuxB	Burkholderiaceae|multidrug
sW1GLCR2	GLCR	GLCR	mexN	multidrug	MEXN	Pseudomonadaceae	Pseudomonadaceae|mexN	Pseudomonadaceae|multidrug
sW1GLCR2	GLCR	GLCR	rpoB2	multidrug	RPOB2	Aurantimonadaceae	Aurantimonadaceae|rpoB2	Aurantimonadaceae|multidrug
sW1GLCR2	GLCR	GLCR	mexE	multidrug	MEXE	Burkholderiaceae	Burkholderiaceae|mexE	Burkholderiaceae|multidrug
sW1GLCR2	GLCR	GLCR	multidrug_ABC_transporter	multidrug	ABC TRANSPORTER	Moraxellaceae	Moraxellaceae|multidrug_ABC_transporter	Moraxellaceae|multidrug
sW1GLCR2	GLCR	GLCR	vanS	glycopeptide	VANS	Pseudonocardiaceae	Pseudonocardiaceae|vanS	Pseudonocardiaceae|glycopeptide
sW1GLCR2	GLCR	GLCR	mtrA	multidrug	MTRA	Mycobacteriaceae	Mycobacteriaceae|mtrA	Mycobacteriaceae|multidrug
sW1GLCR2	GLCR	GLCR	mexB	multidrug	MEXB	Moraxellaceae	Moraxellaceae|mexB	Moraxellaceae|multidrug
sW1GLCR2	GLCR	GLCR	rpoB2	multidrug	RPOB2	Micromonosporaceae	Micromonosporaceae|rpoB2	Micromonosporaceae|multidrug
sW1GLCR2	GLCR	GLCR	ceoB	multidrug	CEOB	Burkholderiaceae	Burkholderiaceae|ceoB	Burkholderiaceae|multidrug
sW1GLCR2	GLCR	GLCR	major_facilitator_superfamily_transporter	multidrug	MFST	Moraxellaceae	Moraxellaceae|major_facilitator_superfamily_transporter	Moraxellaceae|multidrug
sW1GLCR2	GLCR	GLCR	OXA-421	beta-lactam	OXA	Moraxellaceae	Moraxellaceae|OXA	Moraxellaceae|beta-lactam
sW1GLCR2	GLCR	GLCR	multidrug_ABC_transporter	multidrug	ABC TRANSPORTER	Unclassified	Unclassified|multidrug_ABC_transporter	Unclassified|multidrug
sW1GLCR2	GLCR	GLCR	vanR	glycopeptide	VANR	Microbacteriaceae	Microbacteriaceae|vanR	Microbacteriaceae|glycopeptide
sW1GLCR2	GLCR	GLCR	mexF	multidrug	MEXF	Rhodanobacteraceae	Rhodanobacteraceae|mexF	Rhodanobacteraceae|multidrug
sW1GLCR2	GLCR	GLCR	mexF	multidrug	MEXF	Parvibaculaceae	Parvibaculaceae|mexF	Parvibaculaceae|multidrug
sW1GLCR2	GLCR	GLCR	OXA-421	beta-lactam	OXA	Moraxellaceae	Moraxellaceae|OXA	Moraxellaceae|beta-lactam
sW1GLCR2	GLCR	GLCR	MexK	multidrug	MEXK	Moraxellaceae	Moraxellaceae|MexK	Moraxellaceae|multidrug
sW1GLCR2	GLCR	GLCR	adeJ	multidrug	ADEJ	Moraxellaceae	Moraxellaceae|adeJ	Moraxellaceae|multidrug
sW1GLCR2	GLCR	GLCR	amrB	multidrug	AMRB	Burkholderiaceae	Burkholderiaceae|amrB	Burkholderiaceae|multidrug
sW1GLCR2	GLCR	GLCR	rphA	rifamycin	RPHA	Streptomycetaceae	Streptomycetaceae|rphA	Streptomycetaceae|rifamycin
sW1GLCR2	GLCR	GLCR	ceoB	multidrug	CEOB	Burkholderiaceae	Burkholderiaceae|ceoB	Burkholderiaceae|multidrug
sW1GLCR2	GLCR	GLCR	adeJ	multidrug	ADEJ	Moraxellaceae	Moraxellaceae|adeJ	Moraxellaceae|multidrug
sW1GLCR2	GLCR	GLCR	amrB	multidrug	AMRB	Burkholderiaceae	Burkholderiaceae|amrB	Burkholderiaceae|multidrug
sW1GLCR2	GLCR	GLCR	bpeF	multidrug	BPEF	Burkholderiaceae	Burkholderiaceae|bpeF	Burkholderiaceae|multidrug
sW1GLCR2	GLCR	GLCR	mexA	multidrug	MEXA	Pseudomonadaceae	Pseudomonadaceae|mexA	Pseudomonadaceae|multidrug
sW1GLCR2	GLCR	GLCR	mexB	multidrug	MEXB	Pseudomonadaceae	Pseudomonadaceae|mexB	Pseudomonadaceae|multidrug
sW1GLCR2	GLCR	GLCR	oprM	multidrug	OPRM	Pseudomonadaceae	Pseudomonadaceae|oprM	Pseudomonadaceae|multidrug
sW1GLCR2	GLCR	GLCR	mexT	multidrug	MEXT	Moraxellaceae	Moraxellaceae|mexT	Moraxellaceae|multidrug
sW1GLCR2	GLCR	GLCR	MuxB	multidrug	MUXB	Pectobacteriaceae	Pectobacteriaceae|MuxB	Pectobacteriaceae|multidrug
sW1GLCR2	GLCR	GLCR	adeB	multidrug	ADEB	Moraxellaceae	Moraxellaceae|adeB	Moraxellaceae|multidrug
sW1GLCR2	GLCR	GLCR	adeI	multidrug	ADEI	Moraxellaceae	Moraxellaceae|adeI	Moraxellaceae|multidrug
sW1GLCR2	GLCR	GLCR	adeL	multidrug	ADEL	Moraxellaceae	Moraxellaceae|adeL	Moraxellaceae|multidrug
sW1GLCR2	GLCR	GLCR	mexE	multidrug	MEXE	Moraxellaceae	Moraxellaceae|mexE	Moraxellaceae|multidrug
sW1GLCR2	GLCR	GLCR	mdfA	multidrug	MDFA	Moraxellaceae	Moraxellaceae|mdfA	Moraxellaceae|multidrug
sW1GLCR2	GLCR	GLCR	vanR	glycopeptide	VANR	Streptomycetaceae	Streptomycetaceae|vanR	Streptomycetaceae|glycopeptide
sW1GLCR2	GLCR	GLCR	vanR	glycopeptide	VANR	Streptomycetaceae	Streptomycetaceae|vanR	Streptomycetaceae|glycopeptide
sW1GLCR2	GLCR	GLCR	macA	MLS	MACA	Moraxellaceae	Moraxellaceae|macA	Moraxellaceae|MLS
sW1GLCR2	GLCR	GLCR	major_facilitator_superfamily_transporter	multidrug	MFST	Moraxellaceae	Moraxellaceae|major_facilitator_superfamily_transporter	Moraxellaceae|multidrug
sW1GLCR2	GLCR	GLCR	bacA	bacitracin	BACA	Burkholderiaceae	Burkholderiaceae|bacA	Burkholderiaceae|bacitracin
sW1GLCR2	GLCR	GLCR	adeB	multidrug	ADEB	Moraxellaceae	Moraxellaceae|adeB	Moraxellaceae|multidrug
sW1GLCR2	GLCR	GLCR	vanR	glycopeptide	VANR	Streptomycetaceae	Streptomycetaceae|vanR	Streptomycetaceae|glycopeptide
sW1GLCR2	GLCR	GLCR	mexE	multidrug	MEXE	Burkholderiaceae	Burkholderiaceae|mexE	Burkholderiaceae|multidrug
sW1GLCR2	GLCR	GLCR	oprC	multidrug	OPRC	Burkholderiaceae	Burkholderiaceae|oprC	Burkholderiaceae|multidrug
sW1GLCR2	GLCR	GLCR	adeB	multidrug	ADEB	Moraxellaceae	Moraxellaceae|adeB	Moraxellaceae|multidrug
sW1GLCR2	GLCR	GLCR	multidrug_ABC_transporter	multidrug	ABC TRANSPORTER	Streptomycetaceae	Streptomycetaceae|multidrug_ABC_transporter	Streptomycetaceae|multidrug
sW1GLCR2	GLCR	GLCR	mdtB	multidrug	MDTB	Burkholderiaceae	Burkholderiaceae|mdtB	Burkholderiaceae|multidrug
sW1GLCR2	GLCR	GLCR	mexB	multidrug	MEXB	Moraxellaceae	Moraxellaceae|mexB	Moraxellaceae|multidrug
sW1GLCR2	GLCR	GLCR	mexF	multidrug	MEXF	Rhodanobacteraceae	Rhodanobacteraceae|mexF	Rhodanobacteraceae|multidrug
sW1GLCR2	GLCR	GLCR	oqxB	multidrug	OQXB	Burkholderiaceae	Burkholderiaceae|oqxB	Burkholderiaceae|multidrug
sW1GLCR2	GLCR	GLCR	adeC	multidrug	ADEC	Moraxellaceae	Moraxellaceae|adeC	Moraxellaceae|multidrug
sW1GLCR2	GLCR	GLCR	mexT	multidrug	MEXT	Moraxellaceae	Moraxellaceae|mexT	Moraxellaceae|multidrug
sW1GLCR2	GLCR	GLCR	opcM	multidrug	OPCM	Burkholderiaceae	Burkholderiaceae|opcM	Burkholderiaceae|multidrug
sW1GLCR2	GLCR	GLCR	ceoB	multidrug	CEOB	Burkholderiaceae	Burkholderiaceae|ceoB	Burkholderiaceae|multidrug
sW1GLCR2	GLCR	GLCR	mexE	multidrug	MEXE	Burkholderiaceae	Burkholderiaceae|mexE	Burkholderiaceae|multidrug
sW1GLCR2	GLCR	GLCR	rpoB2	multidrug	RPOB2	Streptomycetaceae	Streptomycetaceae|rpoB2	Streptomycetaceae|multidrug
sW1GLCR2	GLCR	GLCR	bpeF	multidrug	BPEF	Burkholderiaceae	Burkholderiaceae|bpeF	Burkholderiaceae|multidrug
sW1GLCR2	GLCR	GLCR	ceoB	multidrug	CEOB	Burkholderiaceae	Burkholderiaceae|ceoB	Burkholderiaceae|multidrug
sW1GLCR2	GLCR	GLCR	adeJ	multidrug	ADEJ	Moraxellaceae	Moraxellaceae|adeJ	Moraxellaceae|multidrug
sW1GLCR2	GLCR	GLCR	bpeF	multidrug	BPEF	Pseudomonadaceae	Pseudomonadaceae|bpeF	Pseudomonadaceae|multidrug
sW1GLCR2	GLCR	GLCR	bacA	bacitracin	BACA	Burkholderiaceae	Burkholderiaceae|bacA	Burkholderiaceae|bacitracin
sW1GLCR2	GLCR	GLCR	mexX	multidrug	MEXX	Burkholderiaceae	Burkholderiaceae|mexX	Burkholderiaceae|multidrug
sW1GLCR2	GLCR	GLCR	amrB	multidrug	AMRB	Burkholderiaceae	Burkholderiaceae|amrB	Burkholderiaceae|multidrug
sW1GLCR2	GLCR	GLCR	bpeF	multidrug	BPEF	Burkholderiaceae	Burkholderiaceae|bpeF	Burkholderiaceae|multidrug
sW1GLCR2	GLCR	GLCR	mexE	multidrug	MEXE	Burkholderiaceae	Burkholderiaceae|mexE	Burkholderiaceae|multidrug
sW1GLCR2	GLCR	GLCR	OpmH	triclosan	OPMH	Pseudomonadaceae	Pseudomonadaceae|OpmH	Pseudomonadaceae|triclosan
sW1GLCR2	GLCR	GLCR	ADC-18	beta-lactam	ADC-18	Moraxellaceae	Moraxellaceae|ADC-18	Moraxellaceae|beta-lactam
sW1GLCR2	GLCR	GLCR	adeH	multidrug	ADEH	Moraxellaceae	Moraxellaceae|adeH	Moraxellaceae|multidrug
sW1GLCR2	GLCR	GLCR	adeJ	multidrug	ADEJ	Moraxellaceae	Moraxellaceae|adeJ	Moraxellaceae|multidrug
sW1GLCR2	GLCR	GLCR	abeS	multidrug	ABES	Moraxellaceae	Moraxellaceae|abeS	Moraxellaceae|multidrug
sW1GLCR2	GLCR	GLCR	aph(3')-I	aminoglycoside	APH(3')-I	Moraxellaceae	Moraxellaceae|aph(3')-I	Moraxellaceae|aminoglycoside
sW1GLCR2	GLCR	GLCR	ceoB	multidrug	CEOB	Burkholderiaceae	Burkholderiaceae|ceoB	Burkholderiaceae|multidrug
sW1GLCR2	GLCR	GLCR	vanR	glycopeptide	VANR	Catenulisporaceae	Catenulisporaceae|vanR	Catenulisporaceae|glycopeptide
sW1GLCR2	GLCR	GLCR	oqxB	multidrug	OQXB	Rhodanobacteraceae	Rhodanobacteraceae|oqxB	Rhodanobacteraceae|multidrug
sW1GLCR2	GLCR	GLCR	mdtL	multidrug	MDTL	Moraxellaceae	Moraxellaceae|mdtL	Moraxellaceae|multidrug
sW1GLCR2	GLCR	GLCR	rosA	fosmidomycin	ROSA	Rhodanobacteraceae	Rhodanobacteraceae|rosA	Rhodanobacteraceae|fosmidomycin
sW1GLCR2	GLCR	GLCR	rpoB2	multidrug	RPOB2	Microbacteriaceae	Microbacteriaceae|rpoB2	Microbacteriaceae|multidrug
sW1GLCR2	GLCR	GLCR	mexX	multidrug	MEXX	Burkholderiaceae	Burkholderiaceae|mexX	Burkholderiaceae|multidrug
sW1GLCR2	GLCR	GLCR	mdtB	multidrug	MDTB	Pseudomonadaceae	Pseudomonadaceae|mdtB	Pseudomonadaceae|multidrug
sW1GLCR2	GLCR	GLCR	vanR	glycopeptide	VANR	Microbacteriaceae	Microbacteriaceae|vanR	Microbacteriaceae|glycopeptide
sW1GLCR2	GLCR	GLCR	mdtB	multidrug	MDTB	Pseudomonadaceae	Pseudomonadaceae|mdtB	Pseudomonadaceae|multidrug
sW1GLCR2	GLCR	GLCR	mdtB	multidrug	MDTB	Unclassified	Unclassified|mdtB	Unclassified|multidrug
sW1GLCR2	GLCR	GLCR	rphB	rifamycin	RPHB	Paenibacillaceae	Paenibacillaceae|rphB	Paenibacillaceae|rifamycin
sW1GLCR2	GLCR	GLCR	TolC	multidrug	TOLC	Moraxellaceae	Moraxellaceae|TolC	Moraxellaceae|multidrug
sW1GLCR2	GLCR	GLCR	rosA	fosmidomycin	ROSA	Comamonadaceae	Comamonadaceae|rosA	Comamonadaceae|fosmidomycin
sW1GLCR2	GLCR	GLCR	adeI	multidrug	ADEI	Moraxellaceae	Moraxellaceae|adeI	Moraxellaceae|multidrug
sW1GLCR2	GLCR	GLCR	rpoB2	multidrug	RPOB2	Nocardioidaceae	Nocardioidaceae|rpoB2	Nocardioidaceae|multidrug
sW1GLCR2	GLCR	GLCR	amrB	multidrug	AMRB	Burkholderiaceae	Burkholderiaceae|amrB	Burkholderiaceae|multidrug
sW1GLCR2	GLCR	GLCR	arnA	peptide	ARNA	Pseudomonadaceae	Pseudomonadaceae|arnA	Pseudomonadaceae|peptide
sW1GLCR2	GLCR	GLCR	mexT	multidrug	MEXT	Pseudomonadaceae	Pseudomonadaceae|mexT	Pseudomonadaceae|multidrug
sW1GLCR2	GLCR	GLCR	bpeF	multidrug	BPEF	Oxalobacteraceae	Oxalobacteraceae|bpeF	Oxalobacteraceae|multidrug
sW1GLCR2	GLCR	GLCR	MuxB	multidrug	MUXB	Unclassified	Unclassified|MuxB	Unclassified|multidrug
sW1GLCR2	GLCR	GLCR	adeC	multidrug	ADEC	Moraxellaceae	Moraxellaceae|adeC	Moraxellaceae|multidrug
sW1GLCR2	GLCR	GLCR	adeJ	multidrug	ADEJ	Moraxellaceae	Moraxellaceae|adeJ	Moraxellaceae|multidrug
sW1GLCR2	GLCR	GLCR	acrB	multidrug	ACRB	Burkholderiaceae	Burkholderiaceae|acrB	Burkholderiaceae|multidrug
sW1GLCS1	GLCS	GLCS	ceoB	multidrug	CEOB	Burkholderiaceae	Burkholderiaceae|ceoB	Burkholderiaceae|multidrug
sW1GLCS1	GLCS	GLCS	adeK	multidrug	ADEK	Moraxellaceae	Moraxellaceae|adeK	Moraxellaceae|multidrug
sW1GLCS1	GLCS	GLCS	adeJ	multidrug	ADEJ	Moraxellaceae	Moraxellaceae|adeJ	Moraxellaceae|multidrug
sW1GLCS1	GLCS	GLCS	adeS	multidrug	ADES	Moraxellaceae	Moraxellaceae|adeS	Moraxellaceae|multidrug
sW1GLCS1	GLCS	GLCS	mdtL	multidrug	MDTL	Moraxellaceae	Moraxellaceae|mdtL	Moraxellaceae|multidrug
sW1GLCS1	GLCS	GLCS	ompR	multidrug	OMPR	Moraxellaceae	Moraxellaceae|ompR	Moraxellaceae|multidrug
sW1GLCS1	GLCS	GLCS	mexE	multidrug	MEXE	Moraxellaceae	Moraxellaceae|mexE	Moraxellaceae|multidrug
sW1GLCS1	GLCS	GLCS	adeS	multidrug	ADES	Moraxellaceae	Moraxellaceae|adeS	Moraxellaceae|multidrug
sW1GLCS1	GLCS	GLCS	adeR	multidrug	ADER	Moraxellaceae	Moraxellaceae|adeR	Moraxellaceae|multidrug
sW1GLCS1	GLCS	GLCS	OXA-421	beta-lactam	OXA	Moraxellaceae	Moraxellaceae|OXA	Moraxellaceae|beta-lactam
sW1GLCS1	GLCS	GLCS	ceoB	multidrug	CEOB	Burkholderiaceae	Burkholderiaceae|ceoB	Burkholderiaceae|multidrug
sW1GLCS1	GLCS	GLCS	metallo-beta-lactamase	beta-lactam	METALLO-BETA-LACTAMASE	Caulobacteraceae	Caulobacteraceae|metallo-beta-lactamase	Caulobacteraceae|beta-lactam
sW1GLCS1	GLCS	GLCS	rosA	fosmidomycin	ROSA	Unclassified	Unclassified|rosA	Unclassified|fosmidomycin
sW1GLCS1	GLCS	GLCS	lsa	MLS	LSA	Paenibacillaceae	Paenibacillaceae|lsa	Paenibacillaceae|MLS
sW1GLCS1	GLCS	GLCS	acrB	multidrug	ACRB	Rhizobiaceae	Rhizobiaceae|acrB	Rhizobiaceae|multidrug
sW1GLCS1	GLCS	GLCS	ceoB	multidrug	CEOB	Burkholderiaceae	Burkholderiaceae|ceoB	Burkholderiaceae|multidrug
sW1GLCS1	GLCS	GLCS	mexB	multidrug	MEXB	Moraxellaceae	Moraxellaceae|mexB	Moraxellaceae|multidrug
sW1GLCS1	GLCS	GLCS	marR	multidrug	MARR	Moraxellaceae	Moraxellaceae|marR	Moraxellaceae|multidrug
sW1GLCS1	GLCS	GLCS	cat_chloramphenicol_acetyltransferase	phenicol	CAT	Planococcaceae	Planococcaceae|cat_chloramphenicol_acetyltransferase	Planococcaceae|phenicol
sW1GLCS1	GLCS	GLCS	mexT	multidrug	MEXT	Pseudomonadaceae	Pseudomonadaceae|mexT	Pseudomonadaceae|multidrug
sW1GLCS1	GLCS	GLCS	bacA	bacitracin	BACA	Pseudomonadaceae	Pseudomonadaceae|bacA	Pseudomonadaceae|bacitracin
sW1GLCS1	GLCS	GLCS	cat_chloramphenicol_acetyltransferase	phenicol	CAT	Rhizobiaceae	Rhizobiaceae|cat_chloramphenicol_acetyltransferase	Rhizobiaceae|phenicol
sW1GLCS1	GLCS	GLCS	multidrug_ABC_transporter	multidrug	ABC TRANSPORTER	Burkholderiaceae	Burkholderiaceae|multidrug_ABC_transporter	Burkholderiaceae|multidrug
sW1GLCS1	GLCS	GLCS	mexE	multidrug	MEXE	Burkholderiaceae	Burkholderiaceae|mexE	Burkholderiaceae|multidrug
sW1GLCS1	GLCS	GLCS	bacA	bacitracin	BACA	Burkholderiaceae	Burkholderiaceae|bacA	Burkholderiaceae|bacitracin
sW1GLCS1	GLCS	GLCS	bacA	bacitracin	BACA	Burkholderiaceae	Burkholderiaceae|bacA	Burkholderiaceae|bacitracin
sW1GLCS1	GLCS	GLCS	acrB	multidrug	ACRB	Alcaligenaceae	Alcaligenaceae|acrB	Alcaligenaceae|multidrug
sW1GLCS1	GLCS	GLCS	mdtB	multidrug	MDTB	Unclassified	Unclassified|mdtB	Unclassified|multidrug
sW1GLCS1	GLCS	GLCS	mexB	multidrug	MEXB	Burkholderiaceae	Burkholderiaceae|mexB	Burkholderiaceae|multidrug
sW1GLCS1	GLCS	GLCS	arnA	peptide	ARNA	Pseudomonadaceae	Pseudomonadaceae|arnA	Pseudomonadaceae|peptide
sW1GLCS1	GLCS	GLCS	adeF	multidrug	ADEF	Brucellaceae	Brucellaceae|adeF	Brucellaceae|multidrug
sW1GLCS1	GLCS	GLCS	mexI	multidrug	MEXI	Alcaligenaceae	Alcaligenaceae|mexI	Alcaligenaceae|multidrug
sW1GLCS1	GLCS	GLCS	bacA	bacitracin	BACA	Unclassified	Unclassified|bacA	Unclassified|bacitracin
sW1GLCS1	GLCS	GLCS	adeB	multidrug	ADEB	Moraxellaceae	Moraxellaceae|adeB	Moraxellaceae|multidrug
sW1GLCS1	GLCS	GLCS	oprM	multidrug	OPRM	Moraxellaceae	Moraxellaceae|oprM	Moraxellaceae|multidrug
sW1GLCS1	GLCS	GLCS	macA	MLS	MACA	Moraxellaceae	Moraxellaceae|macA	Moraxellaceae|MLS
sW1GLCS1	GLCS	GLCS	bacA	bacitracin	BACA	Phyllobacteriaceae	Phyllobacteriaceae|bacA	Phyllobacteriaceae|bacitracin
sW1GLCS1	GLCS	GLCS	mdtK	multidrug	MDTK	Moraxellaceae	Moraxellaceae|mdtK	Moraxellaceae|multidrug
sW1GLCS1	GLCS	GLCS	ADC-23	beta-lactam	ADC-23	Moraxellaceae	Moraxellaceae|ADC-23	Moraxellaceae|beta-lactam
sW1GLCS1	GLCS	GLCS	mexB	multidrug	MEXB	Pseudomonadaceae	Pseudomonadaceae|mexB	Pseudomonadaceae|multidrug
sW1GLCS1	GLCS	GLCS	multidrug_ABC_transporter	multidrug	ABC TRANSPORTER	Moraxellaceae	Moraxellaceae|multidrug_ABC_transporter	Moraxellaceae|multidrug
sW1GLCS1	GLCS	GLCS	bacA	bacitracin	BACA	Burkholderiaceae	Burkholderiaceae|bacA	Burkholderiaceae|bacitracin
sW1GLCS1	GLCS	GLCS	adeC	multidrug	ADEC	Moraxellaceae	Moraxellaceae|adeC	Moraxellaceae|multidrug
sW1GLCS1	GLCS	GLCS	ceoB	multidrug	CEOB	Burkholderiaceae	Burkholderiaceae|ceoB	Burkholderiaceae|multidrug
sW1GLCS1	GLCS	GLCS	carO	beta-lactam	CARO	Moraxellaceae	Moraxellaceae|carO	Moraxellaceae|beta-lactam
sW1GLCS1	GLCS	GLCS	tetA(48)	tetracycline	TETA(48)	Paenibacillaceae	Paenibacillaceae|tetA(48)	Paenibacillaceae|tetracycline
sW1GLCS1	GLCS	GLCS	bacA	bacitracin	BACA	Comamonadaceae	Comamonadaceae|bacA	Comamonadaceae|bacitracin
sW1GLCS1	GLCS	GLCS	emrB	multidrug	EMRB	Moraxellaceae	Moraxellaceae|emrB	Moraxellaceae|multidrug
sW1GLCS1	GLCS	GLCS	MvaT	multidrug	MVAT	Pseudomonadaceae	Pseudomonadaceae|MvaT	Pseudomonadaceae|multidrug
sW1GLCS1	GLCS	GLCS	ceoB	multidrug	CEOB	Burkholderiaceae	Burkholderiaceae|ceoB	Burkholderiaceae|multidrug
sW1GLCS1	GLCS	GLCS	mexF	multidrug	MEXF	Rhodanobacteraceae	Rhodanobacteraceae|mexF	Rhodanobacteraceae|multidrug
sW1GLCS1	GLCS	GLCS	OpmH	triclosan	OPMH	Pseudomonadaceae	Pseudomonadaceae|OpmH	Pseudomonadaceae|triclosan
sW1GLCS1	GLCS	GLCS	vanR	glycopeptide	VANR	Streptomycetaceae	Streptomycetaceae|vanR	Streptomycetaceae|glycopeptide
sW1GLCS1	GLCS	GLCS	mexF	multidrug	MEXF	Burkholderiaceae	Burkholderiaceae|mexF	Burkholderiaceae|multidrug
sW1GLCS1	GLCS	GLCS	mexA	multidrug	MEXA	Pseudomonadaceae	Pseudomonadaceae|mexA	Pseudomonadaceae|multidrug
sW1GLCS1	GLCS	GLCS	adeI	multidrug	ADEI	Moraxellaceae	Moraxellaceae|adeI	Moraxellaceae|multidrug
sW1GLCS1	GLCS	GLCS	rphB	rifamycin	RPHB	Bacillaceae	Bacillaceae|rphB	Bacillaceae|rifamycin
sW1GLCS1	GLCS	GLCS	adeJ	multidrug	ADEJ	Moraxellaceae	Moraxellaceae|adeJ	Moraxellaceae|multidrug
sW1GLCS1	GLCS	GLCS	adeI	multidrug	ADEI	Moraxellaceae	Moraxellaceae|adeI	Moraxellaceae|multidrug
sW1GLCS1	GLCS	GLCS	bpeF	multidrug	BPEF	Burkholderiaceae	Burkholderiaceae|bpeF	Burkholderiaceae|multidrug
sW1GLCS1	GLCS	GLCS	bpeF	multidrug	BPEF	Burkholderiaceae	Burkholderiaceae|bpeF	Burkholderiaceae|multidrug
sW1GLCS1	GLCS	GLCS	bacA	bacitracin	BACA	Burkholderiaceae	Burkholderiaceae|bacA	Burkholderiaceae|bacitracin
sW1GLCS1	GLCS	GLCS	mexB	multidrug	MEXB	Burkholderiaceae	Burkholderiaceae|mexB	Burkholderiaceae|multidrug
sW1GLCS1	GLCS	GLCS	adeJ	multidrug	ADEJ	Moraxellaceae	Moraxellaceae|adeJ	Moraxellaceae|multidrug
sW1GLCS1	GLCS	GLCS	bacA	bacitracin	BACA	Burkholderiaceae	Burkholderiaceae|bacA	Burkholderiaceae|bacitracin
sW1GLCS1	GLCS	GLCS	tetX	tetracycline	TETX	Unclassified	Unclassified|tetX	Unclassified|tetracycline
sW1GLCS1	GLCS	GLCS	ceoB	multidrug	CEOB	Burkholderiaceae	Burkholderiaceae|ceoB	Burkholderiaceae|multidrug
sW1GLCS1	GLCS	GLCS	rphB	rifamycin	RPHB	Paenibacillaceae	Paenibacillaceae|rphB	Paenibacillaceae|rifamycin
sW1GLCS1	GLCS	GLCS	mdfA	multidrug	MDFA	Moraxellaceae	Moraxellaceae|mdfA	Moraxellaceae|multidrug
sW1GLCS1	GLCS	GLCS	ceoB	multidrug	CEOB	Burkholderiaceae	Burkholderiaceae|ceoB	Burkholderiaceae|multidrug
sW1GLCS1	GLCS	GLCS	mexT	multidrug	MEXT	Moraxellaceae	Moraxellaceae|mexT	Moraxellaceae|multidrug
sW1GLCS1	GLCS	GLCS	adeH	multidrug	ADEH	Moraxellaceae	Moraxellaceae|adeH	Moraxellaceae|multidrug
sW1GLCS1	GLCS	GLCS	adeF	multidrug	ADEF	Moraxellaceae	Moraxellaceae|adeF	Moraxellaceae|multidrug
sW1GLCS1	GLCS	GLCS	mexE	multidrug	MEXE	Moraxellaceae	Moraxellaceae|mexE	Moraxellaceae|multidrug
sW1GLCS1	GLCS	GLCS	abeS	multidrug	ABES	Moraxellaceae	Moraxellaceae|abeS	Moraxellaceae|multidrug
sW1GLCS1	GLCS	GLCS	oqxB	multidrug	OQXB	Boseaceae	Boseaceae|oqxB	Boseaceae|multidrug
sW1GLCS1	GLCS	GLCS	mexB	multidrug	MEXB	Burkholderiaceae	Burkholderiaceae|mexB	Burkholderiaceae|multidrug
sW1GLCS1	GLCS	GLCS	acrB	multidrug	ACRB	Alcaligenaceae	Alcaligenaceae|acrB	Alcaligenaceae|multidrug
sW1GLCS1	GLCS	GLCS	mexE	multidrug	MEXE	Burkholderiaceae	Burkholderiaceae|mexE	Burkholderiaceae|multidrug
sW1GLCS1	GLCS	GLCS	bpeF	multidrug	BPEF	Burkholderiaceae	Burkholderiaceae|bpeF	Burkholderiaceae|multidrug
sW1GLCS1	GLCS	GLCS	mexB	multidrug	MEXB	Burkholderiaceae	Burkholderiaceae|mexB	Burkholderiaceae|multidrug
sW1GLCS1	GLCS	GLCS	adeF	multidrug	ADEF	Moraxellaceae	Moraxellaceae|adeF	Moraxellaceae|multidrug
sW1GLCS1	GLCS	GLCS	mexF	multidrug	MEXF	Xanthomonadaceae	Xanthomonadaceae|mexF	Xanthomonadaceae|multidrug
sW1GLCS1	GLCS	GLCS	cat_chloramphenicol_acetyltransferase	phenicol	CAT	Arcobacteraceae	Arcobacteraceae|cat_chloramphenicol_acetyltransferase	Arcobacteraceae|phenicol
sW1GLCS1	GLCS	GLCS	bpeF	multidrug	BPEF	Burkholderiaceae	Burkholderiaceae|bpeF	Burkholderiaceae|multidrug
sW1GLCS1	GLCS	GLCS	bpeF	multidrug	BPEF	Burkholderiaceae	Burkholderiaceae|bpeF	Burkholderiaceae|multidrug
sW1GLCS1	GLCS	GLCS	MuxB	multidrug	MUXB	Pseudomonadaceae	Pseudomonadaceae|MuxB	Pseudomonadaceae|multidrug
sW1GLCS1	GLCS	GLCS	MuxC	multidrug	MUXC	Pseudomonadaceae	Pseudomonadaceae|MuxC	Pseudomonadaceae|multidrug
sW1GLCS1	GLCS	GLCS	mexB	multidrug	MEXB	Moraxellaceae	Moraxellaceae|mexB	Moraxellaceae|multidrug
sW1GLCS1	GLCS	GLCS	bpeF	multidrug	BPEF	Burkholderiaceae	Burkholderiaceae|bpeF	Burkholderiaceae|multidrug
sW1GLCS1	GLCS	GLCS	mexE	multidrug	MEXE	Burkholderiaceae	Burkholderiaceae|mexE	Burkholderiaceae|multidrug
sW1GLCS1	GLCS	GLCS	macB	MLS	MACB	Enterobacteriaceae	Enterobacteriaceae|macB	Enterobacteriaceae|MLS
sW1GLCS1	GLCS	GLCS	MexK	multidrug	MEXK	Pseudomonadaceae	Pseudomonadaceae|MexK	Pseudomonadaceae|multidrug
sW1GLCS1	GLCS	GLCS	fosB	fosfomycin	FOSB	Paenibacillaceae	Paenibacillaceae|fosB	Paenibacillaceae|fosfomycin
sW1GLCS1	GLCS	GLCS	mdtB	multidrug	MDTB	Oxalobacteraceae	Oxalobacteraceae|mdtB	Oxalobacteraceae|multidrug
sW1GLCS1	GLCS	GLCS	bpeF	multidrug	BPEF	Burkholderiaceae	Burkholderiaceae|bpeF	Burkholderiaceae|multidrug
sW1GLCS1	GLCS	GLCS	mdtL	multidrug	MDTL	Moraxellaceae	Moraxellaceae|mdtL	Moraxellaceae|multidrug
sW1GLCS1	GLCS	GLCS	bpeF	multidrug	BPEF	Burkholderiaceae	Burkholderiaceae|bpeF	Burkholderiaceae|multidrug
sW1GLCS1	GLCS	GLCS	mdtB	multidrug	MDTB	Burkholderiaceae	Burkholderiaceae|mdtB	Burkholderiaceae|multidrug
sW1GLCS1	GLCS	GLCS	rosA	fosmidomycin	ROSA	Burkholderiaceae	Burkholderiaceae|rosA	Burkholderiaceae|fosmidomycin
sW1GLCS1	GLCS	GLCS	acrB	multidrug	ACRB	Alcaligenaceae	Alcaligenaceae|acrB	Alcaligenaceae|multidrug
sW1GLCS1	GLCS	GLCS	oprM	multidrug	OPRM	Moraxellaceae	Moraxellaceae|oprM	Moraxellaceae|multidrug
sW1GLCS1	GLCS	GLCS	bpeF	multidrug	BPEF	Burkholderiaceae	Burkholderiaceae|bpeF	Burkholderiaceae|multidrug
sW1GLCS1	GLCS	GLCS	bacA	bacitracin	BACA	Burkholderiaceae	Burkholderiaceae|bacA	Burkholderiaceae|bacitracin
sW1GLCS1	GLCS	GLCS	tetB(48)	tetracycline	TETB(48)	Paenibacillaceae	Paenibacillaceae|tetB(48)	Paenibacillaceae|tetracycline
sW1GLCS1	GLCS	GLCS	ADC-22	beta-lactam	ADC-22	Moraxellaceae	Moraxellaceae|ADC-22	Moraxellaceae|beta-lactam
sW1GLCS1	GLCS	GLCS	MexK	multidrug	MEXK	Xanthomonadaceae	Xanthomonadaceae|MexK	Xanthomonadaceae|multidrug
sW1GLCS1	GLCS	GLCS	ceoB	multidrug	CEOB	Burkholderiaceae	Burkholderiaceae|ceoB	Burkholderiaceae|multidrug
sW1GLCS1	GLCS	GLCS	bpeF	multidrug	BPEF	Burkholderiaceae	Burkholderiaceae|bpeF	Burkholderiaceae|multidrug
sW1GLCS1	GLCS	GLCS	ceoB	multidrug	CEOB	Oxalobacteraceae	Oxalobacteraceae|ceoB	Oxalobacteraceae|multidrug
sW1GLCS1	GLCS	GLCS	adeB	multidrug	ADEB	Moraxellaceae	Moraxellaceae|adeB	Moraxellaceae|multidrug
sW1GLCS1	GLCS	GLCS	adeB	multidrug	ADEB	Moraxellaceae	Moraxellaceae|adeB	Moraxellaceae|multidrug
sW1GLCS1	GLCS	GLCS	mexF	multidrug	MEXF	Rhodanobacteraceae	Rhodanobacteraceae|mexF	Rhodanobacteraceae|multidrug
sW1GLCS1	GLCS	GLCS	mdtL	multidrug	MDTL	Moraxellaceae	Moraxellaceae|mdtL	Moraxellaceae|multidrug
sW1GLCS1	GLCS	GLCS	rphB	rifamycin	RPHB	Paenibacillaceae	Paenibacillaceae|rphB	Paenibacillaceae|rifamycin
sW1GLCS1	GLCS	GLCS	oprM	multidrug	OPRM	Moraxellaceae	Moraxellaceae|oprM	Moraxellaceae|multidrug
sW1GLCS1	GLCS	GLCS	ANT(3'')-IIa	aminoglycoside	ANT(3'')-IIA	Moraxellaceae	Moraxellaceae|ANT(3'')-IIa	Moraxellaceae|aminoglycoside
sW1GLCS1	GLCS	GLCS	acrB	multidrug	ACRB	Unclassified	Unclassified|acrB	Unclassified|multidrug
sW1GLCS1	GLCS	GLCS	bacA	bacitracin	BACA	Burkholderiaceae	Burkholderiaceae|bacA	Burkholderiaceae|bacitracin
sW1GLCS1	GLCS	GLCS	tetR	tetracycline	TETR	Moraxellaceae	Moraxellaceae|tetR	Moraxellaceae|tetracycline
sW1GLCS1	GLCS	GLCS	rphA	rifamycin	RPHA	Pseudonocardiaceae	Pseudonocardiaceae|rphA	Pseudonocardiaceae|rifamycin
sW1GLCS1	GLCS	GLCS	mexN	multidrug	MEXN	Pseudomonadaceae	Pseudomonadaceae|mexN	Pseudomonadaceae|multidrug
sW1GLCS1	GLCS	GLCS	amrB	multidrug	AMRB	Burkholderiaceae	Burkholderiaceae|amrB	Burkholderiaceae|multidrug
sW1GLCS1	GLCS	GLCS	emrB	multidrug	EMRB	Moraxellaceae	Moraxellaceae|emrB	Moraxellaceae|multidrug
sW1GLCS1	GLCS	GLCS	ceoB	multidrug	CEOB	Burkholderiaceae	Burkholderiaceae|ceoB	Burkholderiaceae|multidrug
sW1GLCS1	GLCS	GLCS	rphB	rifamycin	RPHB	Paenibacillaceae	Paenibacillaceae|rphB	Paenibacillaceae|rifamycin
sW1GLCS1	GLCS	GLCS	adeJ	multidrug	ADEJ	Moraxellaceae	Moraxellaceae|adeJ	Moraxellaceae|multidrug
sW1GLCS1	GLCS	GLCS	ceoB	multidrug	CEOB	Burkholderiaceae	Burkholderiaceae|ceoB	Burkholderiaceae|multidrug
sW1GLCS1	GLCS	GLCS	mexE	multidrug	MEXE	Burkholderiaceae	Burkholderiaceae|mexE	Burkholderiaceae|multidrug
sW1GLCS1	GLCS	GLCS	mexF	multidrug	MEXF	Rhodospirillaceae	Rhodospirillaceae|mexF	Rhodospirillaceae|multidrug
sW1GLCS1	GLCS	GLCS	bpeF	multidrug	BPEF	Burkholderiaceae	Burkholderiaceae|bpeF	Burkholderiaceae|multidrug
sW1GLCS1	GLCS	GLCS	ceoB	multidrug	CEOB	Burkholderiaceae	Burkholderiaceae|ceoB	Burkholderiaceae|multidrug
sW1GLCS1	GLCS	GLCS	mexF	multidrug	MEXF	Unclassified	Unclassified|mexF	Unclassified|multidrug
sW1GLCS1	GLCS	GLCS	bpeF	multidrug	BPEF	Burkholderiaceae	Burkholderiaceae|bpeF	Burkholderiaceae|multidrug
sW1GLCS1	GLCS	GLCS	opcM	multidrug	OPCM	Burkholderiaceae	Burkholderiaceae|opcM	Burkholderiaceae|multidrug
sW1GLCS1	GLCS	GLCS	adeF	multidrug	ADEF	Burkholderiaceae	Burkholderiaceae|adeF	Burkholderiaceae|multidrug
sW1GLCS1	GLCS	GLCS	bacA	bacitracin	BACA	Burkholderiaceae	Burkholderiaceae|bacA	Burkholderiaceae|bacitracin
sW1GLCS1	GLCS	GLCS	major_facilitator_superfamily_transporter	multidrug	MFST	Moraxellaceae	Moraxellaceae|major_facilitator_superfamily_transporter	Moraxellaceae|multidrug
sW1GLCS1	GLCS	GLCS	aph(3')-I	aminoglycoside	APH(3')-I	Moraxellaceae	Moraxellaceae|aph(3')-I	Moraxellaceae|aminoglycoside
sW1GLCS1	GLCS	GLCS	bpeF	multidrug	BPEF	Burkholderiaceae	Burkholderiaceae|bpeF	Burkholderiaceae|multidrug
sW1GLCS1	GLCS	GLCS	abeM	multidrug	ABEM	Moraxellaceae	Moraxellaceae|abeM	Moraxellaceae|multidrug
sW1GLCS1	GLCS	GLCS	rphB	rifamycin	RPHB	Paenibacillaceae	Paenibacillaceae|rphB	Paenibacillaceae|rifamycin
sW1GLCS1	GLCS	GLCS	mdtB	multidrug	MDTB	Oxalobacteraceae	Oxalobacteraceae|mdtB	Oxalobacteraceae|multidrug
sW1GLCS1	GLCS	GLCS	ceoB	multidrug	CEOB	Burkholderiaceae	Burkholderiaceae|ceoB	Burkholderiaceae|multidrug
sW1GLCS1	GLCS	GLCS	acrB	multidrug	ACRB	Unclassified	Unclassified|acrB	Unclassified|multidrug
sW1GLCS1	GLCS	GLCS	macA	MLS	MACA	Moraxellaceae	Moraxellaceae|macA	Moraxellaceae|MLS
sW1GLCS1	GLCS	GLCS	mdfA	multidrug	MDFA	Moraxellaceae	Moraxellaceae|mdfA	Moraxellaceae|multidrug
sW1GLCS1	GLCS	GLCS	carO	beta-lactam	CARO	Moraxellaceae	Moraxellaceae|carO	Moraxellaceae|beta-lactam
sW1GLCS1	GLCS	GLCS	mexE	multidrug	MEXE	Pseudomonadaceae	Pseudomonadaceae|mexE	Pseudomonadaceae|multidrug
sW1GLCS1	GLCS	GLCS	TolC	multidrug	TOLC	Moraxellaceae	Moraxellaceae|TolC	Moraxellaceae|multidrug
sW1GLCS1	GLCS	GLCS	tetB(48)	tetracycline	TETB(48)	Paenibacillaceae	Paenibacillaceae|tetB(48)	Paenibacillaceae|tetracycline
sW1GLCS1	GLCS	GLCS	MuxB	multidrug	MUXB	Pseudomonadaceae	Pseudomonadaceae|MuxB	Pseudomonadaceae|multidrug
sW1GLCS1	GLCS	GLCS	sul2	sulfonamide	SUL2	Burkholderiaceae	Burkholderiaceae|sul2	Burkholderiaceae|sulfonamide
sW1GLCS1	GLCS	GLCS	tetB(48)	tetracycline	TETB(48)	Paenibacillaceae	Paenibacillaceae|tetB(48)	Paenibacillaceae|tetracycline
sW1GLCS1	GLCS	GLCS	bpeF	multidrug	BPEF	Alcaligenaceae	Alcaligenaceae|bpeF	Alcaligenaceae|multidrug
sW1GLCS1	GLCS	GLCS	ceoB	multidrug	CEOB	Burkholderiaceae	Burkholderiaceae|ceoB	Burkholderiaceae|multidrug
sW1GLCS1	GLCS	GLCS	mexB	multidrug	MEXB	Burkholderiaceae	Burkholderiaceae|mexB	Burkholderiaceae|multidrug
sW1GLCS1	GLCS	GLCS	tetB(48)	tetracycline	TETB(48)	Paenibacillaceae	Paenibacillaceae|tetB(48)	Paenibacillaceae|tetracycline
sW1GLCS1	GLCS	GLCS	mdtB	multidrug	MDTB	Burkholderiaceae	Burkholderiaceae|mdtB	Burkholderiaceae|multidrug
sW1GLCS1	GLCS	GLCS	mdtK	multidrug	MDTK	Enterobacteriaceae	Enterobacteriaceae|mdtK	Enterobacteriaceae|multidrug
sW1GLCS1	GLCS	GLCS	mexT	multidrug	MEXT	Moraxellaceae	Moraxellaceae|mexT	Moraxellaceae|multidrug
sW1GLCS1	GLCS	GLCS	mexB	multidrug	MEXB	Pseudomonadaceae	Pseudomonadaceae|mexB	Pseudomonadaceae|multidrug
sW1GLCS1	GLCS	GLCS	bacA	bacitracin	BACA	Paenibacillaceae	Paenibacillaceae|bacA	Paenibacillaceae|bacitracin
sW1GLCS1	GLCS	GLCS	MuxB	multidrug	MUXB	Yersiniaceae	Yersiniaceae|MuxB	Yersiniaceae|multidrug
sW1GLCS1	GLCS	GLCS	opcM	multidrug	OPCM	Burkholderiaceae	Burkholderiaceae|opcM	Burkholderiaceae|multidrug
sW1GLCS1	GLCS	GLCS	ceoB	multidrug	CEOB	Burkholderiaceae	Burkholderiaceae|ceoB	Burkholderiaceae|multidrug
sW1GLCS1	GLCS	GLCS	mexE	multidrug	MEXE	Burkholderiaceae	Burkholderiaceae|mexE	Burkholderiaceae|multidrug
sW1GLCS1	GLCS	GLCS	adeA	multidrug	ADEA	Moraxellaceae	Moraxellaceae|adeA	Moraxellaceae|multidrug
sW1GLCS1	GLCS	GLCS	vanR	glycopeptide	VANR	Unclassified	Unclassified|vanR	Unclassified|glycopeptide
sW1GLCS1	GLCS	GLCS	adeB	multidrug	ADEB	Moraxellaceae	Moraxellaceae|adeB	Moraxellaceae|multidrug
sW1GLCS1	GLCS	GLCS	adeF	multidrug	ADEF	Moraxellaceae	Moraxellaceae|adeF	Moraxellaceae|multidrug
sW1GLCS1	GLCS	GLCS	ceoB	multidrug	CEOB	Burkholderiaceae	Burkholderiaceae|ceoB	Burkholderiaceae|multidrug
sW1GLCS1	GLCS	GLCS	multidrug_ABC_transporter	multidrug	ABC TRANSPORTER	Burkholderiaceae	Burkholderiaceae|multidrug_ABC_transporter	Burkholderiaceae|multidrug
sW1GLCS1	GLCS	GLCS	mexB	multidrug	MEXB	Burkholderiaceae	Burkholderiaceae|mexB	Burkholderiaceae|multidrug
sW1GLCS1	GLCS	GLCS	rphB	rifamycin	RPHB	Paenibacillaceae	Paenibacillaceae|rphB	Paenibacillaceae|rifamycin
sW1GLCS1	GLCS	GLCS	mexX	multidrug	MEXX	Burkholderiaceae	Burkholderiaceae|mexX	Burkholderiaceae|multidrug
sW1GLCS1	GLCS	GLCS	amrB	multidrug	AMRB	Burkholderiaceae	Burkholderiaceae|amrB	Burkholderiaceae|multidrug
sW1GLCS1	GLCS	GLCS	bacA	bacitracin	BACA	Burkholderiaceae	Burkholderiaceae|bacA	Burkholderiaceae|bacitracin
sW1GLCS1	GLCS	GLCS	mexF	multidrug	MEXF	Rhodanobacteraceae	Rhodanobacteraceae|mexF	Rhodanobacteraceae|multidrug
sW1GLCS1	GLCS	GLCS	mexF	multidrug	MEXF	Rhodanobacteraceae	Rhodanobacteraceae|mexF	Rhodanobacteraceae|multidrug
sW1GLCS1	GLCS	GLCS	oprM	multidrug	OPRM	Pseudomonadaceae	Pseudomonadaceae|oprM	Pseudomonadaceae|multidrug
sW1GLCS1	GLCS	GLCS	mexB	multidrug	MEXB	Pseudomonadaceae	Pseudomonadaceae|mexB	Pseudomonadaceae|multidrug
sW1GLCS1	GLCS	GLCS	mexA	multidrug	MEXA	Pseudomonadaceae	Pseudomonadaceae|mexA	Pseudomonadaceae|multidrug
sW1GLCS1	GLCS	GLCS	tetA(48)	tetracycline	TETA(48)	Paenibacillaceae	Paenibacillaceae|tetA(48)	Paenibacillaceae|tetracycline
sW1GLCS2	GLCS	GLCS	mexB	multidrug	MEXB	Pseudomonadaceae	Pseudomonadaceae|mexB	Pseudomonadaceae|multidrug
sW1GLCS2	GLCS	GLCS	bpeF	multidrug	BPEF	Burkholderiaceae	Burkholderiaceae|bpeF	Burkholderiaceae|multidrug
sW1GLCS2	GLCS	GLCS	bacA	bacitracin	BACA	Paenibacillaceae	Paenibacillaceae|bacA	Paenibacillaceae|bacitracin
sW1GLCS2	GLCS	GLCS	ceoB	multidrug	CEOB	Alcaligenaceae	Alcaligenaceae|ceoB	Alcaligenaceae|multidrug
sW1GLCS2	GLCS	GLCS	multidrug_ABC_transporter	multidrug	ABC TRANSPORTER	Burkholderiaceae	Burkholderiaceae|multidrug_ABC_transporter	Burkholderiaceae|multidrug
sW1GLCS2	GLCS	GLCS	ceoB	multidrug	CEOB	Burkholderiaceae	Burkholderiaceae|ceoB	Burkholderiaceae|multidrug
sW1GLCS2	GLCS	GLCS	ompR	multidrug	OMPR	Moraxellaceae	Moraxellaceae|ompR	Moraxellaceae|multidrug
sW1GLCS2	GLCS	GLCS	bpeF	multidrug	BPEF	Burkholderiaceae	Burkholderiaceae|bpeF	Burkholderiaceae|multidrug
sW1GLCS2	GLCS	GLCS	mexN	multidrug	MEXN	Pseudomonadaceae	Pseudomonadaceae|mexN	Pseudomonadaceae|multidrug
sW1GLCS2	GLCS	GLCS	mexB	multidrug	MEXB	Moraxellaceae	Moraxellaceae|mexB	Moraxellaceae|multidrug
sW1GLCS2	GLCS	GLCS	mexB	multidrug	MEXB	Moraxellaceae	Moraxellaceae|mexB	Moraxellaceae|multidrug
sW1GLCS2	GLCS	GLCS	MuxB	multidrug	MUXB	Nitrobacteraceae	Nitrobacteraceae|MuxB	Nitrobacteraceae|multidrug
sW1GLCS2	GLCS	GLCS	MexK	multidrug	MEXK	Moraxellaceae	Moraxellaceae|MexK	Moraxellaceae|multidrug
sW1GLCS2	GLCS	GLCS	ceoB	multidrug	CEOB	Burkholderiaceae	Burkholderiaceae|ceoB	Burkholderiaceae|multidrug
sW1GLCS2	GLCS	GLCS	mexF	multidrug	MEXF	Rhodanobacteraceae	Rhodanobacteraceae|mexF	Rhodanobacteraceae|multidrug
sW1GLCS2	GLCS	GLCS	multidrug_ABC_transporter	multidrug	ABC TRANSPORTER	Moraxellaceae	Moraxellaceae|multidrug_ABC_transporter	Moraxellaceae|multidrug
sW1GLCS2	GLCS	GLCS	bacA	bacitracin	BACA	Burkholderiaceae	Burkholderiaceae|bacA	Burkholderiaceae|bacitracin
sW1GLCS2	GLCS	GLCS	adeS	multidrug	ADES	Moraxellaceae	Moraxellaceae|adeS	Moraxellaceae|multidrug
sW1GLCS2	GLCS	GLCS	adeR	multidrug	ADER	Moraxellaceae	Moraxellaceae|adeR	Moraxellaceae|multidrug
sW1GLCS2	GLCS	GLCS	adeA	multidrug	ADEA	Moraxellaceae	Moraxellaceae|adeA	Moraxellaceae|multidrug
sW1GLCS2	GLCS	GLCS	adeB	multidrug	ADEB	Moraxellaceae	Moraxellaceae|adeB	Moraxellaceae|multidrug
sW1GLCS2	GLCS	GLCS	adeC	multidrug	ADEC	Moraxellaceae	Moraxellaceae|adeC	Moraxellaceae|multidrug
sW1GLCS2	GLCS	GLCS	acrB	multidrug	ACRB	Unclassified	Unclassified|acrB	Unclassified|multidrug
sW1GLCS2	GLCS	GLCS	OXA-421	beta-lactam	OXA	Moraxellaceae	Moraxellaceae|OXA	Moraxellaceae|beta-lactam
sW1GLCS2	GLCS	GLCS	rphB	rifamycin	RPHB	Chitinophagaceae	Chitinophagaceae|rphB	Chitinophagaceae|rifamycin
sW1GLCS2	GLCS	GLCS	bpeF	multidrug	BPEF	Burkholderiaceae	Burkholderiaceae|bpeF	Burkholderiaceae|multidrug
sW1GLCS2	GLCS	GLCS	acrB	multidrug	ACRB	Caulobacteraceae	Caulobacteraceae|acrB	Caulobacteraceae|multidrug
sW1GLCS2	GLCS	GLCS	acrB	multidrug	ACRB	Burkholderiaceae	Burkholderiaceae|acrB	Burkholderiaceae|multidrug
sW1GLCS2	GLCS	GLCS	AxyY	multidrug	AXYY	Comamonadaceae	Comamonadaceae|AxyY	Comamonadaceae|multidrug
sW1GLCS2	GLCS	GLCS	acrB	multidrug	ACRB	Burkholderiaceae	Burkholderiaceae|acrB	Burkholderiaceae|multidrug
sW1GLCS2	GLCS	GLCS	MexK	multidrug	MEXK	Pseudomonadaceae	Pseudomonadaceae|MexK	Pseudomonadaceae|multidrug
sW1GLCS2	GLCS	GLCS	ceoB	multidrug	CEOB	Burkholderiaceae	Burkholderiaceae|ceoB	Burkholderiaceae|multidrug
sW1GLCS2	GLCS	GLCS	emrB	multidrug	EMRB	Moraxellaceae	Moraxellaceae|emrB	Moraxellaceae|multidrug
sW1GLCS2	GLCS	GLCS	mexB	multidrug	MEXB	Burkholderiaceae	Burkholderiaceae|mexB	Burkholderiaceae|multidrug
sW1GLCS2	GLCS	GLCS	bacA	bacitracin	BACA	Boseaceae	Boseaceae|bacA	Boseaceae|bacitracin
sW1GLCS2	GLCS	GLCS	opcM	multidrug	OPCM	Burkholderiaceae	Burkholderiaceae|opcM	Burkholderiaceae|multidrug
sW1GLCS2	GLCS	GLCS	ceoB	multidrug	CEOB	Burkholderiaceae	Burkholderiaceae|ceoB	Burkholderiaceae|multidrug
sW1GLCS2	GLCS	GLCS	mexE	multidrug	MEXE	Burkholderiaceae	Burkholderiaceae|mexE	Burkholderiaceae|multidrug
sW1GLCS2	GLCS	GLCS	mexT	multidrug	MEXT	Moraxellaceae	Moraxellaceae|mexT	Moraxellaceae|multidrug
sW1GLCS2	GLCS	GLCS	multidrug_ABC_transporter	multidrug	ABC TRANSPORTER	Burkholderiaceae	Burkholderiaceae|multidrug_ABC_transporter	Burkholderiaceae|multidrug
sW1GLCS2	GLCS	GLCS	mdtK	multidrug	MDTK	Moraxellaceae	Moraxellaceae|mdtK	Moraxellaceae|multidrug
sW1GLCS2	GLCS	GLCS	opcM	multidrug	OPCM	Burkholderiaceae	Burkholderiaceae|opcM	Burkholderiaceae|multidrug
sW1GLCS2	GLCS	GLCS	rosA	fosmidomycin	ROSA	Rhodanobacteraceae	Rhodanobacteraceae|rosA	Rhodanobacteraceae|fosmidomycin
sW1GLCS2	GLCS	GLCS	bacA	bacitracin	BACA	Phyllobacteriaceae	Phyllobacteriaceae|bacA	Phyllobacteriaceae|bacitracin
sW1GLCS2	GLCS	GLCS	mdfA	multidrug	MDFA	Moraxellaceae	Moraxellaceae|mdfA	Moraxellaceae|multidrug
sW1GLCS2	GLCS	GLCS	bacA	bacitracin	BACA	Comamonadaceae	Comamonadaceae|bacA	Comamonadaceae|bacitracin
sW1GLCS2	GLCS	GLCS	rpoB2	multidrug	RPOB2	Unclassified	Unclassified|rpoB2	Unclassified|multidrug
sW1GLCS2	GLCS	GLCS	ceoB	multidrug	CEOB	Burkholderiaceae	Burkholderiaceae|ceoB	Burkholderiaceae|multidrug
sW1GLCS2	GLCS	GLCS	rosA	fosmidomycin	ROSA	Burkholderiaceae	Burkholderiaceae|rosA	Burkholderiaceae|fosmidomycin
sW1GLCS2	GLCS	GLCS	mexX	multidrug	MEXX	Burkholderiaceae	Burkholderiaceae|mexX	Burkholderiaceae|multidrug
sW1GLCS2	GLCS	GLCS	amrB	multidrug	AMRB	Burkholderiaceae	Burkholderiaceae|amrB	Burkholderiaceae|multidrug
sW1GLCS2	GLCS	GLCS	ceoB	multidrug	CEOB	Burkholderiaceae	Burkholderiaceae|ceoB	Burkholderiaceae|multidrug
sW1GLCS2	GLCS	GLCS	acrB	multidrug	ACRB	Sphingomonadaceae	Sphingomonadaceae|acrB	Sphingomonadaceae|multidrug
sW1GLCS2	GLCS	GLCS	bacA	bacitracin	BACA	Burkholderiaceae	Burkholderiaceae|bacA	Burkholderiaceae|bacitracin
sW1GLCS2	GLCS	GLCS	marR	multidrug	MARR	Moraxellaceae	Moraxellaceae|marR	Moraxellaceae|multidrug
sW1GLCS2	GLCS	GLCS	marR	multidrug	MARR	Moraxellaceae	Moraxellaceae|marR	Moraxellaceae|multidrug
sW1GLCS2	GLCS	GLCS	mdfA	multidrug	MDFA	Moraxellaceae	Moraxellaceae|mdfA	Moraxellaceae|multidrug
sW1GLCS2	GLCS	GLCS	MexK	multidrug	MEXK	Moraxellaceae	Moraxellaceae|MexK	Moraxellaceae|multidrug
sW1GLCS2	GLCS	GLCS	MuxB	multidrug	MUXB	Pseudomonadaceae	Pseudomonadaceae|MuxB	Pseudomonadaceae|multidrug
sW1GLCS2	GLCS	GLCS	MuxC	multidrug	MUXC	Pseudomonadaceae	Pseudomonadaceae|MuxC	Pseudomonadaceae|multidrug
sW1GLCS2	GLCS	GLCS	mdtL	multidrug	MDTL	Moraxellaceae	Moraxellaceae|mdtL	Moraxellaceae|multidrug
sW1GLCS2	GLCS	GLCS	tetB(48)	tetracycline	TETB(48)	Paenibacillaceae	Paenibacillaceae|tetB(48)	Paenibacillaceae|tetracycline
sW1GLCS2	GLCS	GLCS	ceoB	multidrug	CEOB	Burkholderiaceae	Burkholderiaceae|ceoB	Burkholderiaceae|multidrug
sW1GLCS2	GLCS	GLCS	MvaT	multidrug	MVAT	Pseudomonadaceae	Pseudomonadaceae|MvaT	Pseudomonadaceae|multidrug
sW1GLCS2	GLCS	GLCS	mexW	multidrug	MEXW	Pseudomonadaceae	Pseudomonadaceae|mexW	Pseudomonadaceae|multidrug
sW1GLCS2	GLCS	GLCS	oqxB	multidrug	OQXB	Enterobacteriaceae	Enterobacteriaceae|oqxB	Enterobacteriaceae|multidrug
sW1GLCS2	GLCS	GLCS	smeB	multidrug	SMEB	Pseudomonadaceae	Pseudomonadaceae|smeB	Pseudomonadaceae|multidrug
sW1GLCS2	GLCS	GLCS	bacA	bacitracin	BACA	Alcaligenaceae	Alcaligenaceae|bacA	Alcaligenaceae|bacitracin
sW1GLCS2	GLCS	GLCS	major_facilitator_superfamily_transporter	multidrug	MFST	Moraxellaceae	Moraxellaceae|major_facilitator_superfamily_transporter	Moraxellaceae|multidrug
sW1GLCS2	GLCS	GLCS	aph(3')-I	aminoglycoside	APH(3')-I	Moraxellaceae	Moraxellaceae|aph(3')-I	Moraxellaceae|aminoglycoside
sW1GLCS2	GLCS	GLCS	vanR	glycopeptide	VANR	Microbacteriaceae	Microbacteriaceae|vanR	Microbacteriaceae|glycopeptide
sW1GLCS2	GLCS	GLCS	tcmA	tetracenomycin_C	TCMA	Streptomycetaceae	Streptomycetaceae|tcmA	Streptomycetaceae|tetracenomycin_C
sW1GLCS2	GLCS	GLCS	MexK	multidrug	MEXK	Xanthomonadaceae	Xanthomonadaceae|MexK	Xanthomonadaceae|multidrug
sW1GLCS2	GLCS	GLCS	mexF	multidrug	MEXF	Rhodanobacteraceae	Rhodanobacteraceae|mexF	Rhodanobacteraceae|multidrug
sW1GLCS2	GLCS	GLCS	mexF	multidrug	MEXF	Pseudomonadaceae	Pseudomonadaceae|mexF	Pseudomonadaceae|multidrug
sW1GLCS2	GLCS	GLCS	mdtB	multidrug	MDTB	Alcaligenaceae	Alcaligenaceae|mdtB	Alcaligenaceae|multidrug
sW1GLCS2	GLCS	GLCS	bacA	bacitracin	BACA	Burkholderiaceae	Burkholderiaceae|bacA	Burkholderiaceae|bacitracin
sW1GLCS2	GLCS	GLCS	bpeF	multidrug	BPEF	Burkholderiaceae	Burkholderiaceae|bpeF	Burkholderiaceae|multidrug
sW1GLCS2	GLCS	GLCS	mexE	multidrug	MEXE	Burkholderiaceae	Burkholderiaceae|mexE	Burkholderiaceae|multidrug
sW1GLCS2	GLCS	GLCS	tetB(48)	tetracycline	TETB(48)	Microbacteriaceae	Microbacteriaceae|tetB(48)	Microbacteriaceae|tetracycline
sW1GLCS2	GLCS	GLCS	bacA	bacitracin	BACA	Burkholderiaceae	Burkholderiaceae|bacA	Burkholderiaceae|bacitracin
sW1GLCS2	GLCS	GLCS	mdfA	multidrug	MDFA	Moraxellaceae	Moraxellaceae|mdfA	Moraxellaceae|multidrug
sW1GLCS2	GLCS	GLCS	ADC-22	beta-lactam	ADC-22	Moraxellaceae	Moraxellaceae|ADC-22	Moraxellaceae|beta-lactam
sW1GLCS2	GLCS	GLCS	mexT	multidrug	MEXT	Moraxellaceae	Moraxellaceae|mexT	Moraxellaceae|multidrug
sW1GLCS2	GLCS	GLCS	vanR	glycopeptide	VANR	Streptomycetaceae	Streptomycetaceae|vanR	Streptomycetaceae|glycopeptide
sW1GLCS2	GLCS	GLCS	mdtL	multidrug	MDTL	Moraxellaceae	Moraxellaceae|mdtL	Moraxellaceae|multidrug
sW1GLCS2	GLCS	GLCS	TolC	multidrug	TOLC	Moraxellaceae	Moraxellaceae|TolC	Moraxellaceae|multidrug
sW1GLCS2	GLCS	GLCS	TolC	multidrug	TOLC	Moraxellaceae	Moraxellaceae|TolC	Moraxellaceae|multidrug
sW1GLCS2	GLCS	GLCS	mtrA	multidrug	MTRA	Streptomycetaceae	Streptomycetaceae|mtrA	Streptomycetaceae|multidrug
sW1GLCS2	GLCS	GLCS	Brucella_suis_mprF	peptide	MPRF	Brucellaceae	Brucellaceae|Brucella_suis_mprF	Brucellaceae|peptide
sW1GLCS2	GLCS	GLCS	amrB	multidrug	AMRB	Comamonadaceae	Comamonadaceae|amrB	Comamonadaceae|multidrug
sW1GLCS2	GLCS	GLCS	tetA(48)	tetracycline	TETA(48)	Unclassified	Unclassified|tetA(48)	Unclassified|tetracycline
sW1GLCS2	GLCS	GLCS	rphB	rifamycin	RPHB	Paenibacillaceae	Paenibacillaceae|rphB	Paenibacillaceae|rifamycin
sW1GLCS2	GLCS	GLCS	rosA	fosmidomycin	ROSA	Burkholderiaceae	Burkholderiaceae|rosA	Burkholderiaceae|fosmidomycin
sW1GLCS2	GLCS	GLCS	lsa	MLS	LSA	Paenibacillaceae	Paenibacillaceae|lsa	Paenibacillaceae|MLS
sW1GLCS2	GLCS	GLCS	bpeF	multidrug	BPEF	Burkholderiaceae	Burkholderiaceae|bpeF	Burkholderiaceae|multidrug
sW1GLCS2	GLCS	GLCS	emrB	multidrug	EMRB	Moraxellaceae	Moraxellaceae|emrB	Moraxellaceae|multidrug
sW1GLCS2	GLCS	GLCS	ceoB	multidrug	CEOB	Burkholderiaceae	Burkholderiaceae|ceoB	Burkholderiaceae|multidrug
sW1GLCS2	GLCS	GLCS	mdtB	multidrug	MDTB	Comamonadaceae	Comamonadaceae|mdtB	Comamonadaceae|multidrug
sW1GLCS2	GLCS	GLCS	mexF	multidrug	MEXF	Rhodanobacteraceae	Rhodanobacteraceae|mexF	Rhodanobacteraceae|multidrug
sW1GLCS2	GLCS	GLCS	bpeF	multidrug	BPEF	Unclassified	Unclassified|bpeF	Unclassified|multidrug
sW1GLCS2	GLCS	GLCS	mexF	multidrug	MEXF	Unclassified	Unclassified|mexF	Unclassified|multidrug
sW1GLCS2	GLCS	GLCS	oprM	multidrug	OPRM	Moraxellaceae	Moraxellaceae|oprM	Moraxellaceae|multidrug
sW1GLCS2	GLCS	GLCS	macA	MLS	MACA	Moraxellaceae	Moraxellaceae|macA	Moraxellaceae|MLS
sW1GLCS2	GLCS	GLCS	mexB	multidrug	MEXB	Pseudomonadaceae	Pseudomonadaceae|mexB	Pseudomonadaceae|multidrug
sW1GLCS2	GLCS	GLCS	mexA	multidrug	MEXA	Pseudomonadaceae	Pseudomonadaceae|mexA	Pseudomonadaceae|multidrug
sW1GLCS2	GLCS	GLCS	tetR	tetracycline	TETR	Moraxellaceae	Moraxellaceae|tetR	Moraxellaceae|tetracycline
sW1GLCS2	GLCS	GLCS	abeM	multidrug	ABEM	Moraxellaceae	Moraxellaceae|abeM	Moraxellaceae|multidrug
sW1GLCS2	GLCS	GLCS	multidrug_ABC_transporter	multidrug	ABC TRANSPORTER	Burkholderiaceae	Burkholderiaceae|multidrug_ABC_transporter	Burkholderiaceae|multidrug
sW1GLCS2	GLCS	GLCS	mdtB	multidrug	MDTB	Pseudomonadaceae	Pseudomonadaceae|mdtB	Pseudomonadaceae|multidrug
sW1GLCS2	GLCS	GLCS	adeJ	multidrug	ADEJ	Moraxellaceae	Moraxellaceae|adeJ	Moraxellaceae|multidrug
sW1GLCS2	GLCS	GLCS	arnA	peptide	ARNA	Pseudomonadaceae	Pseudomonadaceae|arnA	Pseudomonadaceae|peptide
sW1GLCS2	GLCS	GLCS	tetR	tetracycline	TETR	Moraxellaceae	Moraxellaceae|tetR	Moraxellaceae|tetracycline
sW1GLCS2	GLCS	GLCS	mexF	multidrug	MEXF	Rhodanobacteraceae	Rhodanobacteraceae|mexF	Rhodanobacteraceae|multidrug
sW1GLCS2	GLCS	GLCS	mexF	multidrug	MEXF	Caulobacteraceae	Caulobacteraceae|mexF	Caulobacteraceae|multidrug
sW1GLCS2	GLCS	GLCS	rpoB2	multidrug	RPOB2	Streptomycetaceae	Streptomycetaceae|rpoB2	Streptomycetaceae|multidrug
sW1GLCS2	GLCS	GLCS	mexE	multidrug	MEXE	Moraxellaceae	Moraxellaceae|mexE	Moraxellaceae|multidrug
sW1GLCS2	GLCS	GLCS	abeS	multidrug	ABES	Moraxellaceae	Moraxellaceae|abeS	Moraxellaceae|multidrug
sW1GLCS2	GLCS	GLCS	mexT	multidrug	MEXT	Pseudomonadaceae	Pseudomonadaceae|mexT	Pseudomonadaceae|multidrug
sW1GLCS2	GLCS	GLCS	bacA	bacitracin	BACA	Pseudomonadaceae	Pseudomonadaceae|bacA	Pseudomonadaceae|bacitracin
sW1GLCS2	GLCS	GLCS	mexF	multidrug	MEXF	Rhodanobacteraceae	Rhodanobacteraceae|mexF	Rhodanobacteraceae|multidrug
sW1GLCS2	GLCS	GLCS	rpoB2	multidrug	RPOB2	Xanthomonadaceae	Xanthomonadaceae|rpoB2	Xanthomonadaceae|multidrug
sW1GLCS2	GLCS	GLCS	oprC	multidrug	OPRC	Burkholderiaceae	Burkholderiaceae|oprC	Burkholderiaceae|multidrug
sW1GLCS2	GLCS	GLCS	ompR	multidrug	OMPR	Moraxellaceae	Moraxellaceae|ompR	Moraxellaceae|multidrug
sW1GLCS2	GLCS	GLCS	ompR	multidrug	OMPR	Moraxellaceae	Moraxellaceae|ompR	Moraxellaceae|multidrug
sW1GLCS2	GLCS	GLCS	carO	beta-lactam	CARO	Moraxellaceae	Moraxellaceae|carO	Moraxellaceae|beta-lactam
sW1GLCS2	GLCS	GLCS	ceoB	multidrug	CEOB	Burkholderiaceae	Burkholderiaceae|ceoB	Burkholderiaceae|multidrug
sW1GLCS2	GLCS	GLCS	bacA	bacitracin	BACA	Paenibacillaceae	Paenibacillaceae|bacA	Paenibacillaceae|bacitracin
sW1GLCS2	GLCS	GLCS	bpeF	multidrug	BPEF	Burkholderiaceae	Burkholderiaceae|bpeF	Burkholderiaceae|multidrug
sW1GLCS2	GLCS	GLCS	rphB	rifamycin	RPHB	Paenibacillaceae	Paenibacillaceae|rphB	Paenibacillaceae|rifamycin
sW1GLCS2	GLCS	GLCS	rphA	rifamycin	RPHA	Streptomycetaceae	Streptomycetaceae|rphA	Streptomycetaceae|rifamycin
sW1GLCS2	GLCS	GLCS	rphB	rifamycin	RPHB	Paenibacillaceae	Paenibacillaceae|rphB	Paenibacillaceae|rifamycin
sW1GLCS2	GLCS	GLCS	rphB	rifamycin	RPHB	Thermoactinomycetaceae	Thermoactinomycetaceae|rphB	Thermoactinomycetaceae|rifamycin
sW1GLCS2	GLCS	GLCS	bpeF	multidrug	BPEF	Alcaligenaceae	Alcaligenaceae|bpeF	Alcaligenaceae|multidrug
sW1GLCS2	GLCS	GLCS	adeF	multidrug	ADEF	Moraxellaceae	Moraxellaceae|adeF	Moraxellaceae|multidrug
sW1GLCS2	GLCS	GLCS	ceoB	multidrug	CEOB	Boseaceae	Boseaceae|ceoB	Boseaceae|multidrug
sW1GLCS2	GLCS	GLCS	bpeF	multidrug	BPEF	Burkholderiaceae	Burkholderiaceae|bpeF	Burkholderiaceae|multidrug
sW1GLCS2	GLCS	GLCS	tetA(48)	tetracycline	TETA(48)	Paenibacillaceae	Paenibacillaceae|tetA(48)	Paenibacillaceae|tetracycline
sW1GLCS2	GLCS	GLCS	mdtK	multidrug	MDTK	Moraxellaceae	Moraxellaceae|mdtK	Moraxellaceae|multidrug
sW1GLCS2	GLCS	GLCS	bpeF	multidrug	BPEF	Burkholderiaceae	Burkholderiaceae|bpeF	Burkholderiaceae|multidrug
sW1GLCS2	GLCS	GLCS	mexE	multidrug	MEXE	Burkholderiaceae	Burkholderiaceae|mexE	Burkholderiaceae|multidrug
sW1GLCS2	GLCS	GLCS	ceoB	multidrug	CEOB	Burkholderiaceae	Burkholderiaceae|ceoB	Burkholderiaceae|multidrug
sW1GLCS2	GLCS	GLCS	acrB	multidrug	ACRB	Alcaligenaceae	Alcaligenaceae|acrB	Alcaligenaceae|multidrug
sW1GLCS2	GLCS	GLCS	adeJ	multidrug	ADEJ	Moraxellaceae	Moraxellaceae|adeJ	Moraxellaceae|multidrug
sW1GLCS2	GLCS	GLCS	bpeF	multidrug	BPEF	Burkholderiaceae	Burkholderiaceae|bpeF	Burkholderiaceae|multidrug
sW1GLCS2	GLCS	GLCS	tetR	tetracycline	TETR	Moraxellaceae	Moraxellaceae|tetR	Moraxellaceae|tetracycline
sW1GLCS2	GLCS	GLCS	MuxB	multidrug	MUXB	Pseudomonadaceae	Pseudomonadaceae|MuxB	Pseudomonadaceae|multidrug
sW1GLCS2	GLCS	GLCS	OXA-421	beta-lactam	OXA	Moraxellaceae	Moraxellaceae|OXA	Moraxellaceae|beta-lactam
sW1GLCS2	GLCS	GLCS	mexF	multidrug	MEXF	Unclassified	Unclassified|mexF	Unclassified|multidrug
sW1GLCS2	GLCS	GLCS	bacA	bacitracin	BACA	Burkholderiaceae	Burkholderiaceae|bacA	Burkholderiaceae|bacitracin
sW1GLCS2	GLCS	GLCS	mdtB	multidrug	MDTB	Alcaligenaceae	Alcaligenaceae|mdtB	Alcaligenaceae|multidrug
sW1GLCS2	GLCS	GLCS	mexF	multidrug	MEXF	Caulobacteraceae	Caulobacteraceae|mexF	Caulobacteraceae|multidrug
sW1GLCS2	GLCS	GLCS	aac(3)-VII	aminoglycoside	AAC(3)-VII	Streptomycetaceae	Streptomycetaceae|aac(3)-VII	Streptomycetaceae|aminoglycoside
sW1GLCS2	GLCS	GLCS	oprM	multidrug	OPRM	Pseudomonadaceae	Pseudomonadaceae|oprM	Pseudomonadaceae|multidrug
sW1GLCS2	GLCS	GLCS	mexB	multidrug	MEXB	Pseudomonadaceae	Pseudomonadaceae|mexB	Pseudomonadaceae|multidrug
sW1GLCS2	GLCS	GLCS	mexA	multidrug	MEXA	Pseudomonadaceae	Pseudomonadaceae|mexA	Pseudomonadaceae|multidrug
sW1GLCS2	GLCS	GLCS	acrB	multidrug	ACRB	Sphingomonadaceae	Sphingomonadaceae|acrB	Sphingomonadaceae|multidrug
sW1GLCS2	GLCS	GLCS	mexB	multidrug	MEXB	Unclassified	Unclassified|mexB	Unclassified|multidrug
sW1GLCS2	GLCS	GLCS	mdtB	multidrug	MDTB	Xanthomonadaceae	Xanthomonadaceae|mdtB	Xanthomonadaceae|multidrug
sW1GLCS2	GLCS	GLCS	mdtB	multidrug	MDTB	Oxalobacteraceae	Oxalobacteraceae|mdtB	Oxalobacteraceae|multidrug
sW1GLCS2	GLCS	GLCS	mdtB	multidrug	MDTB	Alcaligenaceae	Alcaligenaceae|mdtB	Alcaligenaceae|multidrug
sW1GLCS2	GLCS	GLCS	mexF	multidrug	MEXF	Rhodanobacteraceae	Rhodanobacteraceae|mexF	Rhodanobacteraceae|multidrug
sW1GLCS2	GLCS	GLCS	rphB	rifamycin	RPHB	Bacillaceae	Bacillaceae|rphB	Bacillaceae|rifamycin
sW1GLCS2	GLCS	GLCS	tetB(48)	tetracycline	TETB(48)	Microbacteriaceae	Microbacteriaceae|tetB(48)	Microbacteriaceae|tetracycline
sW1GLCS2	GLCS	GLCS	macA	MLS	MACA	Moraxellaceae	Moraxellaceae|macA	Moraxellaceae|MLS
sW1GLCS2	GLCS	GLCS	multidrug_ABC_transporter	multidrug	ABC TRANSPORTER	Burkholderiaceae	Burkholderiaceae|multidrug_ABC_transporter	Burkholderiaceae|multidrug
sW1GLCS2	GLCS	GLCS	bpeF	multidrug	BPEF	Burkholderiaceae	Burkholderiaceae|bpeF	Burkholderiaceae|multidrug
sW1GLCS2	GLCS	GLCS	ceoB	multidrug	CEOB	Burkholderiaceae	Burkholderiaceae|ceoB	Burkholderiaceae|multidrug
sW1GLCS2	GLCS	GLCS	adeH	multidrug	ADEH	Moraxellaceae	Moraxellaceae|adeH	Moraxellaceae|multidrug
sW1GLCS2	GLCS	GLCS	adeF	multidrug	ADEF	Moraxellaceae	Moraxellaceae|adeF	Moraxellaceae|multidrug
sW1GLCS2	GLCS	GLCS	mexE	multidrug	MEXE	Moraxellaceae	Moraxellaceae|mexE	Moraxellaceae|multidrug
sW1GLCS2	GLCS	GLCS	acrF	multidrug	ACRF	Phyllobacteriaceae	Phyllobacteriaceae|acrF	Phyllobacteriaceae|multidrug
sW1GLCS2	GLCS	GLCS	emrB	multidrug	EMRB	Moraxellaceae	Moraxellaceae|emrB	Moraxellaceae|multidrug
sW1GLCS2	GLCS	GLCS	mexE	multidrug	MEXE	Pseudomonadaceae	Pseudomonadaceae|mexE	Pseudomonadaceae|multidrug
sW1GLCS2	GLCS	GLCS	emrB	multidrug	EMRB	Moraxellaceae	Moraxellaceae|emrB	Moraxellaceae|multidrug
sW1GLCS2	GLCS	GLCS	rphB	rifamycin	RPHB	Bacillaceae	Bacillaceae|rphB	Bacillaceae|rifamycin
sW1GLCS2	GLCS	GLCS	vanX	glycopeptide	VANX	Streptomycetaceae	Streptomycetaceae|vanX	Streptomycetaceae|glycopeptide
sW1GLCS2	GLCS	GLCS	vanI	glycopeptide	VANI	Streptomycetaceae	Streptomycetaceae|vanI	Streptomycetaceae|glycopeptide
sW1GLCS2	GLCS	GLCS	MuxB	multidrug	MUXB	Burkholderiaceae	Burkholderiaceae|MuxB	Burkholderiaceae|multidrug
sW1GLCS2	GLCS	GLCS	rphB	rifamycin	RPHB	Paenibacillaceae	Paenibacillaceae|rphB	Paenibacillaceae|rifamycin
sW1GLCS2	GLCS	GLCS	tcmA	tetracenomycin_C	TCMA	Streptomycetaceae	Streptomycetaceae|tcmA	Streptomycetaceae|tetracenomycin_C
sW1GLCS2	GLCS	GLCS	bacA	bacitracin	BACA	Burkholderiaceae	Burkholderiaceae|bacA	Burkholderiaceae|bacitracin
sW1GLCS2	GLCS	GLCS	ANT(3'')-IIa	aminoglycoside	ANT(3'')-IIA	Moraxellaceae	Moraxellaceae|ANT(3'')-IIa	Moraxellaceae|aminoglycoside
sW1GLCS2	GLCS	GLCS	mexF	multidrug	MEXF	Rhodanobacteraceae	Rhodanobacteraceae|mexF	Rhodanobacteraceae|multidrug
sW1GLCS2	GLCS	GLCS	lsa	MLS	LSA	Paenibacillaceae	Paenibacillaceae|lsa	Paenibacillaceae|MLS
sW1GLCS2	GLCS	GLCS	oprM	multidrug	OPRM	Moraxellaceae	Moraxellaceae|oprM	Moraxellaceae|multidrug
sW1GLCS2	GLCS	GLCS	bpeF	multidrug	BPEF	Burkholderiaceae	Burkholderiaceae|bpeF	Burkholderiaceae|multidrug
sW1GLCS2	GLCS	GLCS	abeS	multidrug	ABES	Moraxellaceae	Moraxellaceae|abeS	Moraxellaceae|multidrug
sW1GLCS2	GLCS	GLCS	adeN	multidrug	ADEN	Moraxellaceae	Moraxellaceae|adeN	Moraxellaceae|multidrug
sW1GLCS2	GLCS	GLCS	mexB	multidrug	MEXB	Moraxellaceae	Moraxellaceae|mexB	Moraxellaceae|multidrug
sW1GLCS2	GLCS	GLCS	bacA	bacitracin	BACA	Burkholderiaceae	Burkholderiaceae|bacA	Burkholderiaceae|bacitracin
sW1GLCS2	GLCS	GLCS	mexF	multidrug	MEXF	Pseudomonadaceae	Pseudomonadaceae|mexF	Pseudomonadaceae|multidrug
sW1GLCS2	GLCS	GLCS	adeF	multidrug	ADEF	Moraxellaceae	Moraxellaceae|adeF	Moraxellaceae|multidrug
sW1GLCS2	GLCS	GLCS	mexE	multidrug	MEXE	Moraxellaceae	Moraxellaceae|mexE	Moraxellaceae|multidrug
sW1GLCS2	GLCS	GLCS	bacA	bacitracin	BACA	Pseudomonadaceae	Pseudomonadaceae|bacA	Pseudomonadaceae|bacitracin
sW1GLCS2	GLCS	GLCS	ADP-ribosylating_transferase_arr	rifamycin	ARR	Nitrobacteraceae	Nitrobacteraceae|ADP-ribosylating_transferase_arr	Nitrobacteraceae|rifamycin
sW1GLCS2	GLCS	GLCS	bpeF	multidrug	BPEF	Burkholderiaceae	Burkholderiaceae|bpeF	Burkholderiaceae|multidrug
sW1GLCS2	GLCS	GLCS	mexF	multidrug	MEXF	Pseudomonadaceae	Pseudomonadaceae|mexF	Pseudomonadaceae|multidrug
sW1GLCS2	GLCS	GLCS	acrB	multidrug	ACRB	Alteromonadaceae	Alteromonadaceae|acrB	Alteromonadaceae|multidrug
sW1GLCS2	GLCS	GLCS	mexF	multidrug	MEXF	Halomonadaceae	Halomonadaceae|mexF	Halomonadaceae|multidrug
sW1GLCS2	GLCS	GLCS	MexK	multidrug	MEXK	Moraxellaceae	Moraxellaceae|MexK	Moraxellaceae|multidrug
sW1GLCS2	GLCS	GLCS	ceoB	multidrug	CEOB	Burkholderiaceae	Burkholderiaceae|ceoB	Burkholderiaceae|multidrug
sW1GLCS2	GLCS	GLCS	oprM	multidrug	OPRM	Moraxellaceae	Moraxellaceae|oprM	Moraxellaceae|multidrug
sW1GLCS2	GLCS	GLCS	lsa	MLS	LSA	Paenibacillaceae	Paenibacillaceae|lsa	Paenibacillaceae|MLS
sW1GLCS2	GLCS	GLCS	ceoB	multidrug	CEOB	Burkholderiaceae	Burkholderiaceae|ceoB	Burkholderiaceae|multidrug
sW1GLCS2	GLCS	GLCS	emrA	multidrug	EMRA	Caulobacteraceae	Caulobacteraceae|emrA	Caulobacteraceae|multidrug
sW1GLCS2	GLCS	GLCS	multidrug_ABC_transporter	multidrug	ABC TRANSPORTER	Alcaligenaceae	Alcaligenaceae|multidrug_ABC_transporter	Alcaligenaceae|multidrug
sW1GLCS2	GLCS	GLCS	adeF	multidrug	ADEF	Moraxellaceae	Moraxellaceae|adeF	Moraxellaceae|multidrug
sW1GLCS2	GLCS	GLCS	adeH	multidrug	ADEH	Moraxellaceae	Moraxellaceae|adeH	Moraxellaceae|multidrug
sW1GLCS2	GLCS	GLCS	bpeF	multidrug	BPEF	Rhizobiaceae	Rhizobiaceae|bpeF	Rhizobiaceae|multidrug
sW1GLCS2	GLCS	GLCS	bacA	bacitracin	BACA	Burkholderiaceae	Burkholderiaceae|bacA	Burkholderiaceae|bacitracin
sW1GLCS2	GLCS	GLCS	rpoB2	multidrug	RPOB2	Devosiaceae	Devosiaceae|rpoB2	Devosiaceae|multidrug
sW1GLCS2	GLCS	GLCS	multidrug_ABC_transporter	multidrug	ABC TRANSPORTER	Alcaligenaceae	Alcaligenaceae|multidrug_ABC_transporter	Alcaligenaceae|multidrug
sW1GLCS2	GLCS	GLCS	major_facilitator_superfamily_transporter	multidrug	MFST	Moraxellaceae	Moraxellaceae|major_facilitator_superfamily_transporter	Moraxellaceae|multidrug
sW1GLCS2	GLCS	GLCS	OpmH	triclosan	OPMH	Pseudomonadaceae	Pseudomonadaceae|OpmH	Pseudomonadaceae|triclosan
sW1GLCS2	GLCS	GLCS	tetA(48)	tetracycline	TETA(48)	Microbacteriaceae	Microbacteriaceae|tetA(48)	Microbacteriaceae|tetracycline
sW1GLCS2	GLCS	GLCS	ceoB	multidrug	CEOB	Burkholderiaceae	Burkholderiaceae|ceoB	Burkholderiaceae|multidrug
sW1GLCS2	GLCS	GLCS	ceoB	multidrug	CEOB	Burkholderiaceae	Burkholderiaceae|ceoB	Burkholderiaceae|multidrug
sW1GLCS2	GLCS	GLCS	rosA	fosmidomycin	ROSA	Rhodanobacteraceae	Rhodanobacteraceae|rosA	Rhodanobacteraceae|fosmidomycin
sW1GLCS2	GLCS	GLCS	ADC-18	beta-lactam	ADC-18	Moraxellaceae	Moraxellaceae|ADC-18	Moraxellaceae|beta-lactam
sW1GLCS2	GLCS	GLCS	tetB(48)	tetracycline	TETB(48)	Paenibacillaceae	Paenibacillaceae|tetB(48)	Paenibacillaceae|tetracycline
sW1GLCS2	GLCS	GLCS	mdtB	multidrug	MDTB	Unclassified	Unclassified|mdtB	Unclassified|multidrug
sW1GLCS2	GLCS	GLCS	bacA	bacitracin	BACA	Sphaerotilaceae	Sphaerotilaceae|bacA	Sphaerotilaceae|bacitracin
sW1GLCS2	GLCS	GLCS	bpeF	multidrug	BPEF	Burkholderiaceae	Burkholderiaceae|bpeF	Burkholderiaceae|multidrug
sW1GLCS2	GLCS	GLCS	bacA	bacitracin	BACA	Burkholderiaceae	Burkholderiaceae|bacA	Burkholderiaceae|bacitracin
sW1GLCS2	GLCS	GLCS	major_facilitator_superfamily_transporter	multidrug	MFST	Moraxellaceae	Moraxellaceae|major_facilitator_superfamily_transporter	Moraxellaceae|multidrug
sW1GLCS2	GLCS	GLCS	MuxB	multidrug	MUXB	Nitrobacteraceae	Nitrobacteraceae|MuxB	Nitrobacteraceae|multidrug
sW1GLCS2	GLCS	GLCS	ompR	multidrug	OMPR	Moraxellaceae	Moraxellaceae|ompR	Moraxellaceae|multidrug
sW1GLCS2	GLCS	GLCS	LlmA_23S_ribosomal_RNA_methyltransferase	MLS	LLMA	Paenibacillaceae	Paenibacillaceae|LlmA_23S_ribosomal_RNA_methyltransferase	Paenibacillaceae|MLS
sW1GLCS2	GLCS	GLCS	mexE	multidrug	MEXE	Burkholderiaceae	Burkholderiaceae|mexE	Burkholderiaceae|multidrug
sW1GLCS2	GLCS	GLCS	mdtB	multidrug	MDTB	Alcaligenaceae	Alcaligenaceae|mdtB	Alcaligenaceae|multidrug
sW1GLCS2	GLCS	GLCS	mdtB	multidrug	MDTB	Alcaligenaceae	Alcaligenaceae|mdtB	Alcaligenaceae|multidrug
sW1GLCS2	GLCS	GLCS	tetB(48)	tetracycline	TETB(48)	Paenibacillaceae	Paenibacillaceae|tetB(48)	Paenibacillaceae|tetracycline
sW1GLCS2	GLCS	GLCS	adeI	multidrug	ADEI	Moraxellaceae	Moraxellaceae|adeI	Moraxellaceae|multidrug
sW1GLCS2	GLCS	GLCS	adeJ	multidrug	ADEJ	Moraxellaceae	Moraxellaceae|adeJ	Moraxellaceae|multidrug
sW1GLCS2	GLCS	GLCS	adeK	multidrug	ADEK	Moraxellaceae	Moraxellaceae|adeK	Moraxellaceae|multidrug
sW1GLCS2	GLCS	GLCS	opcM	multidrug	OPCM	Burkholderiaceae	Burkholderiaceae|opcM	Burkholderiaceae|multidrug
sW1GLCS2	GLCS	GLCS	mexI	multidrug	MEXI	Hyphomicrobiaceae	Hyphomicrobiaceae|mexI	Hyphomicrobiaceae|multidrug
sW1GLCS2	GLCS	GLCS	adeF	multidrug	ADEF	Moraxellaceae	Moraxellaceae|adeF	Moraxellaceae|multidrug
sW1GLCS2	GLCS	GLCS	macA	MLS	MACA	Moraxellaceae	Moraxellaceae|macA	Moraxellaceae|MLS
sW1GLCS2	GLCS	GLCS	bpeF	multidrug	BPEF	Unclassified	Unclassified|bpeF	Unclassified|multidrug
sW1GLCS2	GLCS	GLCS	mexB	multidrug	MEXB	Burkholderiaceae	Burkholderiaceae|mexB	Burkholderiaceae|multidrug
sW1GLCS2	GLCS	GLCS	rphB	rifamycin	RPHB	Clostridiaceae	Clostridiaceae|rphB	Clostridiaceae|rifamycin
sW1GLCS2	GLCS	GLCS	tetA(48)	tetracycline	TETA(48)	Paenibacillaceae	Paenibacillaceae|tetA(48)	Paenibacillaceae|tetracycline
sW1GLCS2	GLCS	GLCS	mexF	multidrug	MEXF	Xanthomonadaceae	Xanthomonadaceae|mexF	Xanthomonadaceae|multidrug
sW1GLCS2	GLCS	GLCS	mexF	multidrug	MEXF	Rhodanobacteraceae	Rhodanobacteraceae|mexF	Rhodanobacteraceae|multidrug
sW1GLCS2	GLCS	GLCS	mexF	multidrug	MEXF	Rhodanobacteraceae	Rhodanobacteraceae|mexF	Rhodanobacteraceae|multidrug
sW1GLCS2	GLCS	GLCS	mdtB	multidrug	MDTB	Comamonadaceae	Comamonadaceae|mdtB	Comamonadaceae|multidrug
sW1GLCS2	GLCS	GLCS	mexF	multidrug	MEXF	Rhodanobacteraceae	Rhodanobacteraceae|mexF	Rhodanobacteraceae|multidrug
sW1GLCS2	GLCS	GLCS	adeB	multidrug	ADEB	Moraxellaceae	Moraxellaceae|adeB	Moraxellaceae|multidrug
sW1GLT1R1	GLT1R	GLTR	mexN	multidrug	MEXN	Pseudomonadaceae	Pseudomonadaceae|mexN	Pseudomonadaceae|multidrug
sW1GLT1R1	GLT1R	GLTR	mdtB	multidrug	MDTB	Nitrobacteraceae	Nitrobacteraceae|mdtB	Nitrobacteraceae|multidrug
sW1GLT1R1	GLT1R	GLTR	mexB	multidrug	MEXB	Moraxellaceae	Moraxellaceae|mexB	Moraxellaceae|multidrug
sW1GLT1R1	GLT1R	GLTR	mexF	multidrug	MEXF	Xanthomonadaceae	Xanthomonadaceae|mexF	Xanthomonadaceae|multidrug
sW1GLT1R1	GLT1R	GLTR	rpoB2	multidrug	RPOB2	Microbacteriaceae	Microbacteriaceae|rpoB2	Microbacteriaceae|multidrug
sW1GLT1R1	GLT1R	GLTR	MuxB	multidrug	MUXB	Microbulbiferaceae	Microbulbiferaceae|MuxB	Microbulbiferaceae|multidrug
sW1GLT1R1	GLT1R	GLTR	ceoB	multidrug	CEOB	Burkholderiaceae	Burkholderiaceae|ceoB	Burkholderiaceae|multidrug
sW1GLT1R1	GLT1R	GLTR	TolC	multidrug	TOLC	Moraxellaceae	Moraxellaceae|TolC	Moraxellaceae|multidrug
sW1GLT1R1	GLT1R	GLTR	adeJ	multidrug	ADEJ	Moraxellaceae	Moraxellaceae|adeJ	Moraxellaceae|multidrug
sW1GLT1R1	GLT1R	GLTR	adeK	multidrug	ADEK	Moraxellaceae	Moraxellaceae|adeK	Moraxellaceae|multidrug
sW1GLT1R1	GLT1R	GLTR	abeM	multidrug	ABEM	Moraxellaceae	Moraxellaceae|abeM	Moraxellaceae|multidrug
sW1GLT1R1	GLT1R	GLTR	oprC	multidrug	OPRC	Burkholderiaceae	Burkholderiaceae|oprC	Burkholderiaceae|multidrug
sW1GLT1R1	GLT1R	GLTR	emrB	multidrug	EMRB	Moraxellaceae	Moraxellaceae|emrB	Moraxellaceae|multidrug
sW1GLT1R1	GLT1R	GLTR	multidrug_ABC_transporter	multidrug	ABC TRANSPORTER	Streptomycetaceae	Streptomycetaceae|multidrug_ABC_transporter	Streptomycetaceae|multidrug
sW1GLT1R1	GLT1R	GLTR	mexB	multidrug	MEXB	Moraxellaceae	Moraxellaceae|mexB	Moraxellaceae|multidrug
sW1GLT1R1	GLT1R	GLTR	bpeF	multidrug	BPEF	Burkholderiaceae	Burkholderiaceae|bpeF	Burkholderiaceae|multidrug
sW1GLT1R1	GLT1R	GLTR	OXA-421	beta-lactam	OXA	Moraxellaceae	Moraxellaceae|OXA	Moraxellaceae|beta-lactam
sW1GLT1R1	GLT1R	GLTR	bacA	bacitracin	BACA	Burkholderiaceae	Burkholderiaceae|bacA	Burkholderiaceae|bacitracin
sW1GLT1R1	GLT1R	GLTR	macA	MLS	MACA	Moraxellaceae	Moraxellaceae|macA	Moraxellaceae|MLS
sW1GLT1R1	GLT1R	GLTR	oprM	multidrug	OPRM	Moraxellaceae	Moraxellaceae|oprM	Moraxellaceae|multidrug
sW1GLT1R1	GLT1R	GLTR	metallo-beta-lactamase	beta-lactam	METALLO-BETA-LACTAMASE	Myxococcaceae	Myxococcaceae|metallo-beta-lactamase	Myxococcaceae|beta-lactam
sW1GLT1R1	GLT1R	GLTR	MuxB	multidrug	MUXB	Burkholderiaceae	Burkholderiaceae|MuxB	Burkholderiaceae|multidrug
sW1GLT1R1	GLT1R	GLTR	adeN	multidrug	ADEN	Moraxellaceae	Moraxellaceae|adeN	Moraxellaceae|multidrug
sW1GLT1R1	GLT1R	GLTR	adeN	multidrug	ADEN	Moraxellaceae	Moraxellaceae|adeN	Moraxellaceae|multidrug
sW1GLT1R1	GLT1R	GLTR	mdtB	multidrug	MDTB	Burkholderiaceae	Burkholderiaceae|mdtB	Burkholderiaceae|multidrug
sW1GLT1R1	GLT1R	GLTR	ceoB	multidrug	CEOB	Burkholderiaceae	Burkholderiaceae|ceoB	Burkholderiaceae|multidrug
sW1GLT1R1	GLT1R	GLTR	mexF	multidrug	MEXF	Unclassified	Unclassified|mexF	Unclassified|multidrug
sW1GLT1R1	GLT1R	GLTR	AxyY	multidrug	AXYY	Burkholderiaceae	Burkholderiaceae|AxyY	Burkholderiaceae|multidrug
sW1GLT1R1	GLT1R	GLTR	bacA	bacitracin	BACA	Burkholderiaceae	Burkholderiaceae|bacA	Burkholderiaceae|bacitracin
sW1GLT1R1	GLT1R	GLTR	mdfA	multidrug	MDFA	Moraxellaceae	Moraxellaceae|mdfA	Moraxellaceae|multidrug
sW1GLT1R1	GLT1R	GLTR	bacA	bacitracin	BACA	Burkholderiaceae	Burkholderiaceae|bacA	Burkholderiaceae|bacitracin
sW1GLT1R1	GLT1R	GLTR	mdtB	multidrug	MDTB	Pseudomonadaceae	Pseudomonadaceae|mdtB	Pseudomonadaceae|multidrug
sW1GLT1R1	GLT1R	GLTR	mdtB	multidrug	MDTB	Enterobacteriaceae	Enterobacteriaceae|mdtB	Enterobacteriaceae|multidrug
sW1GLT1R1	GLT1R	GLTR	mexB	multidrug	MEXB	Moraxellaceae	Moraxellaceae|mexB	Moraxellaceae|multidrug
sW1GLT1R1	GLT1R	GLTR	mexB	multidrug	MEXB	Moraxellaceae	Moraxellaceae|mexB	Moraxellaceae|multidrug
sW1GLT1R1	GLT1R	GLTR	mexB	multidrug	MEXB	Moraxellaceae	Moraxellaceae|mexB	Moraxellaceae|multidrug
sW1GLT1R1	GLT1R	GLTR	macA	MLS	MACA	Moraxellaceae	Moraxellaceae|macA	Moraxellaceae|MLS
sW1GLT1R1	GLT1R	GLTR	oprM	multidrug	OPRM	Moraxellaceae	Moraxellaceae|oprM	Moraxellaceae|multidrug
sW1GLT1R1	GLT1R	GLTR	adeB	multidrug	ADEB	Moraxellaceae	Moraxellaceae|adeB	Moraxellaceae|multidrug
sW1GLT1R1	GLT1R	GLTR	adeC	multidrug	ADEC	Moraxellaceae	Moraxellaceae|adeC	Moraxellaceae|multidrug
sW1GLT1R1	GLT1R	GLTR	mdtL	multidrug	MDTL	Moraxellaceae	Moraxellaceae|mdtL	Moraxellaceae|multidrug
sW1GLT1R1	GLT1R	GLTR	marR	multidrug	MARR	Moraxellaceae	Moraxellaceae|marR	Moraxellaceae|multidrug
sW1GLT1R1	GLT1R	GLTR	mdtB	multidrug	MDTB	Unclassified	Unclassified|mdtB	Unclassified|multidrug
sW1GLT1R1	GLT1R	GLTR	adeI	multidrug	ADEI	Moraxellaceae	Moraxellaceae|adeI	Moraxellaceae|multidrug
sW1GLT1R1	GLT1R	GLTR	bpeF	multidrug	BPEF	Pseudomonadaceae	Pseudomonadaceae|bpeF	Pseudomonadaceae|multidrug
sW1GLT1R1	GLT1R	GLTR	acrB	multidrug	ACRB	Streptomycetaceae	Streptomycetaceae|acrB	Streptomycetaceae|multidrug
sW1GLT1R1	GLT1R	GLTR	ceoB	multidrug	CEOB	Burkholderiaceae	Burkholderiaceae|ceoB	Burkholderiaceae|multidrug
sW1GLT1R1	GLT1R	GLTR	arnA	peptide	ARNA	Pseudomonadaceae	Pseudomonadaceae|arnA	Pseudomonadaceae|peptide
sW1GLT1R1	GLT1R	GLTR	adeI	multidrug	ADEI	Moraxellaceae	Moraxellaceae|adeI	Moraxellaceae|multidrug
sW1GLT1R1	GLT1R	GLTR	adeJ	multidrug	ADEJ	Moraxellaceae	Moraxellaceae|adeJ	Moraxellaceae|multidrug
sW1GLT1R1	GLT1R	GLTR	mexF	multidrug	MEXF	Pseudomonadaceae	Pseudomonadaceae|mexF	Pseudomonadaceae|multidrug
sW1GLT1R1	GLT1R	GLTR	mdtL	multidrug	MDTL	Moraxellaceae	Moraxellaceae|mdtL	Moraxellaceae|multidrug
sW1GLT1R1	GLT1R	GLTR	multidrug_ABC_transporter	multidrug	ABC TRANSPORTER	Streptomycetaceae	Streptomycetaceae|multidrug_ABC_transporter	Streptomycetaceae|multidrug
sW1GLT1R1	GLT1R	GLTR	rphB	rifamycin	RPHB	Chitinophagaceae	Chitinophagaceae|rphB	Chitinophagaceae|rifamycin
sW1GLT1R1	GLT1R	GLTR	bacA	bacitracin	BACA	Comamonadaceae	Comamonadaceae|bacA	Comamonadaceae|bacitracin
sW1GLT1R1	GLT1R	GLTR	adeJ	multidrug	ADEJ	Moraxellaceae	Moraxellaceae|adeJ	Moraxellaceae|multidrug
sW1GLT1R1	GLT1R	GLTR	ompR	multidrug	OMPR	Moraxellaceae	Moraxellaceae|ompR	Moraxellaceae|multidrug
sW1GLT1R1	GLT1R	GLTR	ompR	multidrug	OMPR	Moraxellaceae	Moraxellaceae|ompR	Moraxellaceae|multidrug
sW1GLT1R1	GLT1R	GLTR	oprM	multidrug	OPRM	Pseudomonadaceae	Pseudomonadaceae|oprM	Pseudomonadaceae|multidrug
sW1GLT1R1	GLT1R	GLTR	mexB	multidrug	MEXB	Pseudomonadaceae	Pseudomonadaceae|mexB	Pseudomonadaceae|multidrug
sW1GLT1R1	GLT1R	GLTR	mexA	multidrug	MEXA	Pseudomonadaceae	Pseudomonadaceae|mexA	Pseudomonadaceae|multidrug
sW1GLT1R1	GLT1R	GLTR	mexB	multidrug	MEXB	Moraxellaceae	Moraxellaceae|mexB	Moraxellaceae|multidrug
sW1GLT1R1	GLT1R	GLTR	ceoB	multidrug	CEOB	Burkholderiaceae	Burkholderiaceae|ceoB	Burkholderiaceae|multidrug
sW1GLT1R1	GLT1R	GLTR	adeF	multidrug	ADEF	Pseudomonadaceae	Pseudomonadaceae|adeF	Pseudomonadaceae|multidrug
sW1GLT1R1	GLT1R	GLTR	marR	multidrug	MARR	Moraxellaceae	Moraxellaceae|marR	Moraxellaceae|multidrug
sW1GLT1R1	GLT1R	GLTR	mexE	multidrug	MEXE	Moraxellaceae	Moraxellaceae|mexE	Moraxellaceae|multidrug
sW1GLT1R1	GLT1R	GLTR	bpeF	multidrug	BPEF	Burkholderiaceae	Burkholderiaceae|bpeF	Burkholderiaceae|multidrug
sW1GLT1R1	GLT1R	GLTR	acrB	multidrug	ACRB	Burkholderiaceae	Burkholderiaceae|acrB	Burkholderiaceae|multidrug
sW1GLT1R1	GLT1R	GLTR	aph(3')-I	aminoglycoside	APH(3')-I	Moraxellaceae	Moraxellaceae|aph(3')-I	Moraxellaceae|aminoglycoside
sW1GLT1R1	GLT1R	GLTR	major_facilitator_superfamily_transporter	multidrug	MFST	Moraxellaceae	Moraxellaceae|major_facilitator_superfamily_transporter	Moraxellaceae|multidrug
sW1GLT1R1	GLT1R	GLTR	emrB	multidrug	EMRB	Moraxellaceae	Moraxellaceae|emrB	Moraxellaceae|multidrug
sW1GLT1R1	GLT1R	GLTR	mdfA	multidrug	MDFA	Moraxellaceae	Moraxellaceae|mdfA	Moraxellaceae|multidrug
sW1GLT1R1	GLT1R	GLTR	bacA	bacitracin	BACA	Burkholderiaceae	Burkholderiaceae|bacA	Burkholderiaceae|bacitracin
sW1GLT1R1	GLT1R	GLTR	adeC	multidrug	ADEC	Moraxellaceae	Moraxellaceae|adeC	Moraxellaceae|multidrug
sW1GLT1R1	GLT1R	GLTR	mdtC	multidrug	MDTC	Pseudomonadaceae	Pseudomonadaceae|mdtC	Pseudomonadaceae|multidrug
sW1GLT1R1	GLT1R	GLTR	opcM	multidrug	OPCM	Burkholderiaceae	Burkholderiaceae|opcM	Burkholderiaceae|multidrug
sW1GLT1R1	GLT1R	GLTR	carO	beta-lactam	CARO	Moraxellaceae	Moraxellaceae|carO	Moraxellaceae|beta-lactam
sW1GLT1R1	GLT1R	GLTR	ANT(3'')-IIa	aminoglycoside	ANT(3'')-IIA	Moraxellaceae	Moraxellaceae|ANT(3'')-IIa	Moraxellaceae|aminoglycoside
sW1GLT1R1	GLT1R	GLTR	ADC-22	beta-lactam	ADC-22	Moraxellaceae	Moraxellaceae|ADC-22	Moraxellaceae|beta-lactam
sW1GLT1R1	GLT1R	GLTR	rphB	rifamycin	RPHB	Chitinophagaceae	Chitinophagaceae|rphB	Chitinophagaceae|rifamycin
sW1GLT1R1	GLT1R	GLTR	rphA	rifamycin	RPHA	Myxococcaceae	Myxococcaceae|rphA	Myxococcaceae|rifamycin
sW1GLT1R1	GLT1R	GLTR	vanX	glycopeptide	VANX	Streptomycetaceae	Streptomycetaceae|vanX	Streptomycetaceae|glycopeptide
sW1GLT1R1	GLT1R	GLTR	multidrug_ABC_transporter	multidrug	ABC TRANSPORTER	Streptomycetaceae	Streptomycetaceae|multidrug_ABC_transporter	Streptomycetaceae|multidrug
sW1GLT1R1	GLT1R	GLTR	mexF	multidrug	MEXF	Rhodanobacteraceae	Rhodanobacteraceae|mexF	Rhodanobacteraceae|multidrug
sW1GLT1R1	GLT1R	GLTR	ADC-18	beta-lactam	ADC-18	Moraxellaceae	Moraxellaceae|ADC-18	Moraxellaceae|beta-lactam
sW1GLT1R1	GLT1R	GLTR	MvaT	multidrug	MVAT	Pseudomonadaceae	Pseudomonadaceae|MvaT	Pseudomonadaceae|multidrug
sW1GLT1R1	GLT1R	GLTR	tetA(48)	tetracycline	TETA(48)	Microbacteriaceae	Microbacteriaceae|tetA(48)	Microbacteriaceae|tetracycline
sW1GLT1R1	GLT1R	GLTR	mexT	multidrug	MEXT	Moraxellaceae	Moraxellaceae|mexT	Moraxellaceae|multidrug
sW1GLT1R1	GLT1R	GLTR	adeK	multidrug	ADEK	Moraxellaceae	Moraxellaceae|adeK	Moraxellaceae|multidrug
sW1GLT1R1	GLT1R	GLTR	adeJ	multidrug	ADEJ	Moraxellaceae	Moraxellaceae|adeJ	Moraxellaceae|multidrug
sW1GLT1R1	GLT1R	GLTR	adeI	multidrug	ADEI	Moraxellaceae	Moraxellaceae|adeI	Moraxellaceae|multidrug
sW1GLT1R1	GLT1R	GLTR	rpoB2	multidrug	RPOB2	Kribbellaceae	Kribbellaceae|rpoB2	Kribbellaceae|multidrug
sW1GLT1R1	GLT1R	GLTR	marR	multidrug	MARR	Moraxellaceae	Moraxellaceae|marR	Moraxellaceae|multidrug
sW1GLT1R1	GLT1R	GLTR	rpoB2	multidrug	RPOB2	Rhizobiaceae	Rhizobiaceae|rpoB2	Rhizobiaceae|multidrug
sW1GLT1R1	GLT1R	GLTR	carO	beta-lactam	CARO	Moraxellaceae	Moraxellaceae|carO	Moraxellaceae|beta-lactam
sW1GLT1R1	GLT1R	GLTR	tcmA	tetracenomycin_C	TCMA	Streptomycetaceae	Streptomycetaceae|tcmA	Streptomycetaceae|tetracenomycin_C
sW1GLT1R1	GLT1R	GLTR	mexW	multidrug	MEXW	Pseudomonadaceae	Pseudomonadaceae|mexW	Pseudomonadaceae|multidrug
sW1GLT1R1	GLT1R	GLTR	adeJ	multidrug	ADEJ	Moraxellaceae	Moraxellaceae|adeJ	Moraxellaceae|multidrug
sW1GLT1R1	GLT1R	GLTR	ceoB	multidrug	CEOB	Burkholderiaceae	Burkholderiaceae|ceoB	Burkholderiaceae|multidrug
sW1GLT1R1	GLT1R	GLTR	ompR	multidrug	OMPR	Moraxellaceae	Moraxellaceae|ompR	Moraxellaceae|multidrug
sW1GLT1R1	GLT1R	GLTR	bpeF	multidrug	BPEF	Burkholderiaceae	Burkholderiaceae|bpeF	Burkholderiaceae|multidrug
sW1GLT1R1	GLT1R	GLTR	mexT	multidrug	MEXT	Pseudomonadaceae	Pseudomonadaceae|mexT	Pseudomonadaceae|multidrug
sW1GLT1R1	GLT1R	GLTR	bacA	bacitracin	BACA	Pseudomonadaceae	Pseudomonadaceae|bacA	Pseudomonadaceae|bacitracin
sW1GLT1R1	GLT1R	GLTR	abeS	multidrug	ABES	Moraxellaceae	Moraxellaceae|abeS	Moraxellaceae|multidrug
sW1GLT1R1	GLT1R	GLTR	abeS	multidrug	ABES	Moraxellaceae	Moraxellaceae|abeS	Moraxellaceae|multidrug
sW1GLT1R1	GLT1R	GLTR	rpoB2	multidrug	RPOB2	Mycobacteriaceae	Mycobacteriaceae|rpoB2	Mycobacteriaceae|multidrug
sW1GLT1R1	GLT1R	GLTR	amrB	multidrug	AMRB	Oxalobacteraceae	Oxalobacteraceae|amrB	Oxalobacteraceae|multidrug
sW1GLT1R1	GLT1R	GLTR	ceoB	multidrug	CEOB	Burkholderiaceae	Burkholderiaceae|ceoB	Burkholderiaceae|multidrug
sW1GLT1R1	GLT1R	GLTR	mexA	multidrug	MEXA	Pseudomonadaceae	Pseudomonadaceae|mexA	Pseudomonadaceae|multidrug
sW1GLT1R1	GLT1R	GLTR	mexB	multidrug	MEXB	Pseudomonadaceae	Pseudomonadaceae|mexB	Pseudomonadaceae|multidrug
sW1GLT1R1	GLT1R	GLTR	OXA-62	beta-lactam	OXA	Burkholderiaceae	Burkholderiaceae|OXA	Burkholderiaceae|beta-lactam
sW1GLT1R1	GLT1R	GLTR	adeS	multidrug	ADES	Moraxellaceae	Moraxellaceae|adeS	Moraxellaceae|multidrug
sW1GLT1R1	GLT1R	GLTR	adeR	multidrug	ADER	Moraxellaceae	Moraxellaceae|adeR	Moraxellaceae|multidrug
sW1GLT1R1	GLT1R	GLTR	adeA	multidrug	ADEA	Moraxellaceae	Moraxellaceae|adeA	Moraxellaceae|multidrug
sW1GLT1R1	GLT1R	GLTR	adeB	multidrug	ADEB	Moraxellaceae	Moraxellaceae|adeB	Moraxellaceae|multidrug
sW1GLT1R1	GLT1R	GLTR	adeC	multidrug	ADEC	Moraxellaceae	Moraxellaceae|adeC	Moraxellaceae|multidrug
sW1GLT1R1	GLT1R	GLTR	MexK	multidrug	MEXK	Moraxellaceae	Moraxellaceae|MexK	Moraxellaceae|multidrug
sW1GLT1R1	GLT1R	GLTR	mexE	multidrug	MEXE	Moraxellaceae	Moraxellaceae|mexE	Moraxellaceae|multidrug
sW1GLT1R1	GLT1R	GLTR	adeF	multidrug	ADEF	Oxalobacteraceae	Oxalobacteraceae|adeF	Oxalobacteraceae|multidrug
sW1GLT1R1	GLT1R	GLTR	mdtB	multidrug	MDTB	Comamonadaceae	Comamonadaceae|mdtB	Comamonadaceae|multidrug
sW1GLT1R1	GLT1R	GLTR	adeF	multidrug	ADEF	Comamonadaceae	Comamonadaceae|adeF	Comamonadaceae|multidrug
sW1GLT1R1	GLT1R	GLTR	ceoB	multidrug	CEOB	Alcaligenaceae	Alcaligenaceae|ceoB	Alcaligenaceae|multidrug
sW1GLT1R1	GLT1R	GLTR	mdfA	multidrug	MDFA	Moraxellaceae	Moraxellaceae|mdfA	Moraxellaceae|multidrug
sW1GLT1R1	GLT1R	GLTR	mexE	multidrug	MEXE	Pseudomonadaceae	Pseudomonadaceae|mexE	Pseudomonadaceae|multidrug
sW1GLT1R1	GLT1R	GLTR	mexF	multidrug	MEXF	Pseudomonadaceae	Pseudomonadaceae|mexF	Pseudomonadaceae|multidrug
sW1GLT1R1	GLT1R	GLTR	adeI	multidrug	ADEI	Moraxellaceae	Moraxellaceae|adeI	Moraxellaceae|multidrug
sW1GLT1R1	GLT1R	GLTR	adeF	multidrug	ADEF	Moraxellaceae	Moraxellaceae|adeF	Moraxellaceae|multidrug
sW1GLT1R1	GLT1R	GLTR	adeH	multidrug	ADEH	Moraxellaceae	Moraxellaceae|adeH	Moraxellaceae|multidrug
sW1GLT1R1	GLT1R	GLTR	mdtK	multidrug	MDTK	Moraxellaceae	Moraxellaceae|mdtK	Moraxellaceae|multidrug
sW1GLT1R1	GLT1R	GLTR	adeB	multidrug	ADEB	Moraxellaceae	Moraxellaceae|adeB	Moraxellaceae|multidrug
sW1GLT1R1	GLT1R	GLTR	bpeF	multidrug	BPEF	Burkholderiaceae	Burkholderiaceae|bpeF	Burkholderiaceae|multidrug
sW1GLT1R1	GLT1R	GLTR	mdtB	multidrug	MDTB	Nitrobacteraceae	Nitrobacteraceae|mdtB	Nitrobacteraceae|multidrug
sW1GLT1R1	GLT1R	GLTR	multidrug_ABC_transporter	multidrug	ABC TRANSPORTER	Streptomycetaceae	Streptomycetaceae|multidrug_ABC_transporter	Streptomycetaceae|multidrug
sW1GLT1R1	GLT1R	GLTR	ceoB	multidrug	CEOB	Unclassified	Unclassified|ceoB	Unclassified|multidrug
sW1GLT1R1	GLT1R	GLTR	OXA-62	beta-lactam	OXA	Burkholderiaceae	Burkholderiaceae|OXA	Burkholderiaceae|beta-lactam
sW1GLT1R1	GLT1R	GLTR	adeF	multidrug	ADEF	Moraxellaceae	Moraxellaceae|adeF	Moraxellaceae|multidrug
sW1GLT1R1	GLT1R	GLTR	mexE	multidrug	MEXE	Moraxellaceae	Moraxellaceae|mexE	Moraxellaceae|multidrug
sW1GLT1R1	GLT1R	GLTR	adeI	multidrug	ADEI	Moraxellaceae	Moraxellaceae|adeI	Moraxellaceae|multidrug
sW1GLT1R1	GLT1R	GLTR	MuxB	multidrug	MUXB	Comamonadaceae	Comamonadaceae|MuxB	Comamonadaceae|multidrug
sW1GLT1R1	GLT1R	GLTR	adeI	multidrug	ADEI	Moraxellaceae	Moraxellaceae|adeI	Moraxellaceae|multidrug
sW1GLT1R1	GLT1R	GLTR	MexK	multidrug	MEXK	Pseudomonadaceae	Pseudomonadaceae|MexK	Pseudomonadaceae|multidrug
sW1GLT1R1	GLT1R	GLTR	oprM	multidrug	OPRM	Burkholderiaceae	Burkholderiaceae|oprM	Burkholderiaceae|multidrug
sW1GLT1R1	GLT1R	GLTR	mexT	multidrug	MEXT	Moraxellaceae	Moraxellaceae|mexT	Moraxellaceae|multidrug
sW1GLT1R1	GLT1R	GLTR	ompR	multidrug	OMPR	Moraxellaceae	Moraxellaceae|ompR	Moraxellaceae|multidrug
sW1GLT1R1	GLT1R	GLTR	mdfA	multidrug	MDFA	Moraxellaceae	Moraxellaceae|mdfA	Moraxellaceae|multidrug
sW1GLT1R1	GLT1R	GLTR	vanR	glycopeptide	VANR	Streptomycetaceae	Streptomycetaceae|vanR	Streptomycetaceae|glycopeptide
sW1GLT1R1	GLT1R	GLTR	acrF	multidrug	ACRF	Burkholderiaceae	Burkholderiaceae|acrF	Burkholderiaceae|multidrug
sW1GLT1R1	GLT1R	GLTR	bpeF	multidrug	BPEF	Burkholderiaceae	Burkholderiaceae|bpeF	Burkholderiaceae|multidrug
sW1GLT1R1	GLT1R	GLTR	adeR	multidrug	ADER	Moraxellaceae	Moraxellaceae|adeR	Moraxellaceae|multidrug
sW1GLT1R1	GLT1R	GLTR	adeF	multidrug	ADEF	Oxalobacteraceae	Oxalobacteraceae|adeF	Oxalobacteraceae|multidrug
sW1GLT1R1	GLT1R	GLTR	marR	multidrug	MARR	Moraxellaceae	Moraxellaceae|marR	Moraxellaceae|multidrug
sW1GLT1R1	GLT1R	GLTR	adeF	multidrug	ADEF	Rhizobiaceae	Rhizobiaceae|adeF	Rhizobiaceae|multidrug
sW1GLT1R1	GLT1R	GLTR	tcmA	tetracenomycin_C	TCMA	Streptomycetaceae	Streptomycetaceae|tcmA	Streptomycetaceae|tetracenomycin_C
sW1GLT1R1	GLT1R	GLTR	bpeF	multidrug	BPEF	Burkholderiaceae	Burkholderiaceae|bpeF	Burkholderiaceae|multidrug
sW1GLT1R1	GLT1R	GLTR	bpeF	multidrug	BPEF	Burkholderiaceae	Burkholderiaceae|bpeF	Burkholderiaceae|multidrug
sW1GLT1R1	GLT1R	GLTR	ceoB	multidrug	CEOB	Burkholderiaceae	Burkholderiaceae|ceoB	Burkholderiaceae|multidrug
sW1GLT1R1	GLT1R	GLTR	acrB	multidrug	ACRB	Pseudomonadaceae	Pseudomonadaceae|acrB	Pseudomonadaceae|multidrug
sW1GLT1R1	GLT1R	GLTR	mexE	multidrug	MEXE	Burkholderiaceae	Burkholderiaceae|mexE	Burkholderiaceae|multidrug
sW1GLT1R1	GLT1R	GLTR	mexB	multidrug	MEXB	Moraxellaceae	Moraxellaceae|mexB	Moraxellaceae|multidrug
sW1GLT1R1	GLT1R	GLTR	bpeF	multidrug	BPEF	Burkholderiaceae	Burkholderiaceae|bpeF	Burkholderiaceae|multidrug
sW1GLT1R1	GLT1R	GLTR	bpeF	multidrug	BPEF	Burkholderiaceae	Burkholderiaceae|bpeF	Burkholderiaceae|multidrug
sW1GLT1R1	GLT1R	GLTR	adeC	multidrug	ADEC	Moraxellaceae	Moraxellaceae|adeC	Moraxellaceae|multidrug
sW1GLT1R1	GLT1R	GLTR	OXA-421	beta-lactam	OXA	Moraxellaceae	Moraxellaceae|OXA	Moraxellaceae|beta-lactam
sW1GLT1R1	GLT1R	GLTR	bpeF	multidrug	BPEF	Burkholderiaceae	Burkholderiaceae|bpeF	Burkholderiaceae|multidrug
sW1GLT1R1	GLT1R	GLTR	mexE	multidrug	MEXE	Burkholderiaceae	Burkholderiaceae|mexE	Burkholderiaceae|multidrug
sW1GLT1R1	GLT1R	GLTR	MuxB	multidrug	MUXB	Burkholderiaceae	Burkholderiaceae|MuxB	Burkholderiaceae|multidrug
sW1GLT1R1	GLT1R	GLTR	rpoB2	multidrug	RPOB2	Streptomycetaceae	Streptomycetaceae|rpoB2	Streptomycetaceae|multidrug
sW1GLT1R1	GLT1R	GLTR	ceoB	multidrug	CEOB	Burkholderiaceae	Burkholderiaceae|ceoB	Burkholderiaceae|multidrug
sW1GLT1R1	GLT1R	GLTR	OpmH	triclosan	OPMH	Pseudomonadaceae	Pseudomonadaceae|OpmH	Pseudomonadaceae|triclosan
sW1GLT1R1	GLT1R	GLTR	mtrA	multidrug	MTRA	Micrococcaceae	Micrococcaceae|mtrA	Micrococcaceae|multidrug
sW1GLT1R1	GLT1R	GLTR	vanR	glycopeptide	VANR	Streptomycetaceae	Streptomycetaceae|vanR	Streptomycetaceae|glycopeptide
sW1GLT1R1	GLT1R	GLTR	mexE	multidrug	MEXE	Burkholderiaceae	Burkholderiaceae|mexE	Burkholderiaceae|multidrug
sW1GLT1R1	GLT1R	GLTR	rphA	rifamycin	RPHA	Streptomycetaceae	Streptomycetaceae|rphA	Streptomycetaceae|rifamycin
sW1GLT1R1	GLT1R	GLTR	adeB	multidrug	ADEB	Moraxellaceae	Moraxellaceae|adeB	Moraxellaceae|multidrug
sW1GLT1R1	GLT1R	GLTR	rphB	rifamycin	RPHB	Bacillaceae	Bacillaceae|rphB	Bacillaceae|rifamycin
sW1GLT1R1	GLT1R	GLTR	rphB	rifamycin	RPHB	Thermoactinomycetaceae	Thermoactinomycetaceae|rphB	Thermoactinomycetaceae|rifamycin
sW1GLT1R1	GLT1R	GLTR	ceoB	multidrug	CEOB	Burkholderiaceae	Burkholderiaceae|ceoB	Burkholderiaceae|multidrug
sW1GLT1R1	GLT1R	GLTR	mdfA	multidrug	MDFA	Moraxellaceae	Moraxellaceae|mdfA	Moraxellaceae|multidrug
sW1GLT1R1	GLT1R	GLTR	mexY	multidrug	MEXY	Burkholderiaceae	Burkholderiaceae|mexY	Burkholderiaceae|multidrug
sW1GLT1R1	GLT1R	GLTR	mdtK	multidrug	MDTK	Moraxellaceae	Moraxellaceae|mdtK	Moraxellaceae|multidrug
sW1GLT1R1	GLT1R	GLTR	OXA-352	beta-lactam	OXA	Moraxellaceae	Moraxellaceae|OXA	Moraxellaceae|beta-lactam
sW1GLT1R1	GLT1R	GLTR	rpoB2	multidrug	RPOB2	Micromonosporaceae	Micromonosporaceae|rpoB2	Micromonosporaceae|multidrug
sW1GLT1R1	GLT1R	GLTR	ceoB	multidrug	CEOB	Burkholderiaceae	Burkholderiaceae|ceoB	Burkholderiaceae|multidrug
sW1GLT1R1	GLT1R	GLTR	bpeF	multidrug	BPEF	Burkholderiaceae	Burkholderiaceae|bpeF	Burkholderiaceae|multidrug
sW1GLT1R1	GLT1R	GLTR	MuxB	multidrug	MUXB	Pseudomonadaceae	Pseudomonadaceae|MuxB	Pseudomonadaceae|multidrug
sW1GLT1R1	GLT1R	GLTR	MuxC	multidrug	MUXC	Pseudomonadaceae	Pseudomonadaceae|MuxC	Pseudomonadaceae|multidrug
sW1GLT1R1	GLT1R	GLTR	bpeF	multidrug	BPEF	Burkholderiaceae	Burkholderiaceae|bpeF	Burkholderiaceae|multidrug
sW1GLT1R1	GLT1R	GLTR	ceoB	multidrug	CEOB	Oxalobacteraceae	Oxalobacteraceae|ceoB	Oxalobacteraceae|multidrug
sW1GLT1R1	GLT1R	GLTR	ceoB	multidrug	CEOB	Burkholderiaceae	Burkholderiaceae|ceoB	Burkholderiaceae|multidrug
sW1GLT1R1	GLT1R	GLTR	ceoB	multidrug	CEOB	Burkholderiaceae	Burkholderiaceae|ceoB	Burkholderiaceae|multidrug
sW1GLT1R1	GLT1R	GLTR	tetR	tetracycline	TETR	Moraxellaceae	Moraxellaceae|tetR	Moraxellaceae|tetracycline
sW1GLT1R1	GLT1R	GLTR	opcM	multidrug	OPCM	Burkholderiaceae	Burkholderiaceae|opcM	Burkholderiaceae|multidrug
sW1GLT1R1	GLT1R	GLTR	ceoB	multidrug	CEOB	Burkholderiaceae	Burkholderiaceae|ceoB	Burkholderiaceae|multidrug
sW1GLT1R1	GLT1R	GLTR	mexE	multidrug	MEXE	Burkholderiaceae	Burkholderiaceae|mexE	Burkholderiaceae|multidrug
sW1GLT1R1	GLT1R	GLTR	tetR	tetracycline	TETR	Moraxellaceae	Moraxellaceae|tetR	Moraxellaceae|tetracycline
sW1GLT1R1	GLT1R	GLTR	ceoB	multidrug	CEOB	Burkholderiaceae	Burkholderiaceae|ceoB	Burkholderiaceae|multidrug
sW1GLT1R1	GLT1R	GLTR	acrB	multidrug	ACRB	Sphingomonadaceae	Sphingomonadaceae|acrB	Sphingomonadaceae|multidrug
sW1GLT1R1	GLT1R	GLTR	mexB	multidrug	MEXB	Moraxellaceae	Moraxellaceae|mexB	Moraxellaceae|multidrug
sW1GLT1R1	GLT1R	GLTR	mexE	multidrug	MEXE	Moraxellaceae	Moraxellaceae|mexE	Moraxellaceae|multidrug
sW1GLT1R1	GLT1R	GLTR	multidrug_ABC_transporter	multidrug	ABC TRANSPORTER	Moraxellaceae	Moraxellaceae|multidrug_ABC_transporter	Moraxellaceae|multidrug
sW1GLT1R1	GLT1R	GLTR	rosA	fosmidomycin	ROSA	Rhodanobacteraceae	Rhodanobacteraceae|rosA	Rhodanobacteraceae|fosmidomycin
sW1GLT1R1	GLT1R	GLTR	mexE	multidrug	MEXE	Burkholderiaceae	Burkholderiaceae|mexE	Burkholderiaceae|multidrug
sW1GLT1R1	GLT1R	GLTR	vanX	glycopeptide	VANX	Streptomycetaceae	Streptomycetaceae|vanX	Streptomycetaceae|glycopeptide
sW1GLT1R1	GLT1R	GLTR	bpeF	multidrug	BPEF	Burkholderiaceae	Burkholderiaceae|bpeF	Burkholderiaceae|multidrug
sW1GLT1R1	GLT1R	GLTR	oqxB	multidrug	OQXB	Unclassified	Unclassified|oqxB	Unclassified|multidrug
sW1GLT1R1	GLT1R	GLTR	mexF	multidrug	MEXF	Xanthomonadaceae	Xanthomonadaceae|mexF	Xanthomonadaceae|multidrug
sW1GLT1R1	GLT1R	GLTR	ceoB	multidrug	CEOB	Burkholderiaceae	Burkholderiaceae|ceoB	Burkholderiaceae|multidrug
sW1GLT1R1	GLT1R	GLTR	tetR	tetracycline	TETR	Moraxellaceae	Moraxellaceae|tetR	Moraxellaceae|tetracycline
sW1GLT1R1	GLT1R	GLTR	mtrA	multidrug	MTRA	Streptomycetaceae	Streptomycetaceae|mtrA	Streptomycetaceae|multidrug
sW1GLT1R1	GLT1R	GLTR	vanR	glycopeptide	VANR	Unclassified	Unclassified|vanR	Unclassified|glycopeptide
sW1GLT1R1	GLT1R	GLTR	MuxB	multidrug	MUXB	Comamonadaceae	Comamonadaceae|MuxB	Comamonadaceae|multidrug
sW1GLT1R1	GLT1R	GLTR	adeH	multidrug	ADEH	Moraxellaceae	Moraxellaceae|adeH	Moraxellaceae|multidrug
sW1GLT1R1	GLT1R	GLTR	adeF	multidrug	ADEF	Moraxellaceae	Moraxellaceae|adeF	Moraxellaceae|multidrug
sW1GLT1R1	GLT1R	GLTR	bacA	bacitracin	BACA	Burkholderiaceae	Burkholderiaceae|bacA	Burkholderiaceae|bacitracin
sW1GLT1R1	GLT1R	GLTR	opcM	multidrug	OPCM	Burkholderiaceae	Burkholderiaceae|opcM	Burkholderiaceae|multidrug
sW1GLT1R1	GLT1R	GLTR	adeA	multidrug	ADEA	Moraxellaceae	Moraxellaceae|adeA	Moraxellaceae|multidrug
sW1GLT1R1	GLT1R	GLTR	adeB	multidrug	ADEB	Moraxellaceae	Moraxellaceae|adeB	Moraxellaceae|multidrug
sW1GLT1R1	GLT1R	GLTR	mexB	multidrug	MEXB	Pseudomonadaceae	Pseudomonadaceae|mexB	Pseudomonadaceae|multidrug
sW1GLT1R1	GLT1R	GLTR	mexF	multidrug	MEXF	Rhodanobacteraceae	Rhodanobacteraceae|mexF	Rhodanobacteraceae|multidrug
sW1GLT1R1	GLT1R	GLTR	ceoB	multidrug	CEOB	Burkholderiaceae	Burkholderiaceae|ceoB	Burkholderiaceae|multidrug
sW1GLT1R1	GLT1R	GLTR	bpeF	multidrug	BPEF	Burkholderiaceae	Burkholderiaceae|bpeF	Burkholderiaceae|multidrug
sW1GLT1R1	GLT1R	GLTR	mexF	multidrug	MEXF	Rhodanobacteraceae	Rhodanobacteraceae|mexF	Rhodanobacteraceae|multidrug
sW1GLT1R1	GLT1R	GLTR	amrB	multidrug	AMRB	Burkholderiaceae	Burkholderiaceae|amrB	Burkholderiaceae|multidrug
sW1GLT1R1	GLT1R	GLTR	mexX	multidrug	MEXX	Burkholderiaceae	Burkholderiaceae|mexX	Burkholderiaceae|multidrug
sW1GLT1R1	GLT1R	GLTR	aac(3)-VII	aminoglycoside	AAC(3)-VII	Streptomycetaceae	Streptomycetaceae|aac(3)-VII	Streptomycetaceae|aminoglycoside
sW1GLT1R1	GLT1R	GLTR	tetA(48)	tetracycline	TETA(48)	Streptomycetaceae	Streptomycetaceae|tetA(48)	Streptomycetaceae|tetracycline
sW1GLT1R1	GLT1R	GLTR	bacA	bacitracin	BACA	Burkholderiaceae	Burkholderiaceae|bacA	Burkholderiaceae|bacitracin
sW1GLT1R1	GLT1R	GLTR	oqxB	multidrug	OQXB	Enterobacteriaceae	Enterobacteriaceae|oqxB	Enterobacteriaceae|multidrug
sW1GLT1R1	GLT1R	GLTR	mexB	multidrug	MEXB	Moraxellaceae	Moraxellaceae|mexB	Moraxellaceae|multidrug
sW1GLT1R1	GLT1R	GLTR	rpoB2	multidrug	RPOB2	Unclassified	Unclassified|rpoB2	Unclassified|multidrug
sW1GLT1R1	GLT1R	GLTR	rphB	rifamycin	RPHB	Microbacteriaceae	Microbacteriaceae|rphB	Microbacteriaceae|rifamycin
sW1GLT1R1	GLT1R	GLTR	adeB	multidrug	ADEB	Moraxellaceae	Moraxellaceae|adeB	Moraxellaceae|multidrug
sW1GLT1R1	GLT1R	GLTR	opcM	multidrug	OPCM	Burkholderiaceae	Burkholderiaceae|opcM	Burkholderiaceae|multidrug
sW1GLT1R2	GLT1R	GLTR	emrB	multidrug	EMRB	Moraxellaceae	Moraxellaceae|emrB	Moraxellaceae|multidrug
sW1GLT1R2	GLT1R	GLTR	adeJ	multidrug	ADEJ	Moraxellaceae	Moraxellaceae|adeJ	Moraxellaceae|multidrug
sW1GLT1R2	GLT1R	GLTR	multidrug_ABC_transporter	multidrug	ABC TRANSPORTER	Streptomycetaceae	Streptomycetaceae|multidrug_ABC_transporter	Streptomycetaceae|multidrug
sW1GLT1R2	GLT1R	GLTR	OXA-421	beta-lactam	OXA	Moraxellaceae	Moraxellaceae|OXA	Moraxellaceae|beta-lactam
sW1GLT1R2	GLT1R	GLTR	ADC-18	beta-lactam	ADC-18	Moraxellaceae	Moraxellaceae|ADC-18	Moraxellaceae|beta-lactam
sW1GLT1R2	GLT1R	GLTR	MuxB	multidrug	MUXB	Pseudomonadaceae	Pseudomonadaceae|MuxB	Pseudomonadaceae|multidrug
sW1GLT1R2	GLT1R	GLTR	MuxC	multidrug	MUXC	Pseudomonadaceae	Pseudomonadaceae|MuxC	Pseudomonadaceae|multidrug
sW1GLT1R2	GLT1R	GLTR	mexF	multidrug	MEXF	Rhodanobacteraceae	Rhodanobacteraceae|mexF	Rhodanobacteraceae|multidrug
sW1GLT1R2	GLT1R	GLTR	bpeF	multidrug	BPEF	Alcaligenaceae	Alcaligenaceae|bpeF	Alcaligenaceae|multidrug
sW1GLT1R2	GLT1R	GLTR	rphB	rifamycin	RPHB	Paenibacillaceae	Paenibacillaceae|rphB	Paenibacillaceae|rifamycin
sW1GLT1R2	GLT1R	GLTR	bacA	bacitracin	BACA	Comamonadaceae	Comamonadaceae|bacA	Comamonadaceae|bacitracin
sW1GLT1R2	GLT1R	GLTR	rpoB2	multidrug	RPOB2	Nocardioidaceae	Nocardioidaceae|rpoB2	Nocardioidaceae|multidrug
sW1GLT1R2	GLT1R	GLTR	tetB(48)	tetracycline	TETB(48)	Paenibacillaceae	Paenibacillaceae|tetB(48)	Paenibacillaceae|tetracycline
sW1GLT1R2	GLT1R	GLTR	vanR	glycopeptide	VANR	Unclassified	Unclassified|vanR	Unclassified|glycopeptide
sW1GLT1R2	GLT1R	GLTR	mexE	multidrug	MEXE	Pseudomonadaceae	Pseudomonadaceae|mexE	Pseudomonadaceae|multidrug
sW1GLT1R2	GLT1R	GLTR	mexF	multidrug	MEXF	Pseudomonadaceae	Pseudomonadaceae|mexF	Pseudomonadaceae|multidrug
sW1GLT1R2	GLT1R	GLTR	bacA	bacitracin	BACA	Burkholderiaceae	Burkholderiaceae|bacA	Burkholderiaceae|bacitracin
sW1GLT1R2	GLT1R	GLTR	mexT	multidrug	MEXT	Moraxellaceae	Moraxellaceae|mexT	Moraxellaceae|multidrug
sW1GLT1R2	GLT1R	GLTR	oprM	multidrug	OPRM	Pseudomonadaceae	Pseudomonadaceae|oprM	Pseudomonadaceae|multidrug
sW1GLT1R2	GLT1R	GLTR	mexB	multidrug	MEXB	Pseudomonadaceae	Pseudomonadaceae|mexB	Pseudomonadaceae|multidrug
sW1GLT1R2	GLT1R	GLTR	mexA	multidrug	MEXA	Pseudomonadaceae	Pseudomonadaceae|mexA	Pseudomonadaceae|multidrug
sW1GLT1R2	GLT1R	GLTR	tetA(48)	tetracycline	TETA(48)	Microbacteriaceae	Microbacteriaceae|tetA(48)	Microbacteriaceae|tetracycline
sW1GLT1R2	GLT1R	GLTR	metallo-beta-lactamase	beta-lactam	METALLO-BETA-LACTAMASE	Caulobacteraceae	Caulobacteraceae|metallo-beta-lactamase	Caulobacteraceae|beta-lactam
sW1GLT1R2	GLT1R	GLTR	mexT	multidrug	MEXT	Moraxellaceae	Moraxellaceae|mexT	Moraxellaceae|multidrug
sW1GLT1R2	GLT1R	GLTR	marR	multidrug	MARR	Moraxellaceae	Moraxellaceae|marR	Moraxellaceae|multidrug
sW1GLT1R2	GLT1R	GLTR	abeS	multidrug	ABES	Moraxellaceae	Moraxellaceae|abeS	Moraxellaceae|multidrug
sW1GLT1R2	GLT1R	GLTR	mexE	multidrug	MEXE	Moraxellaceae	Moraxellaceae|mexE	Moraxellaceae|multidrug
sW1GLT1R2	GLT1R	GLTR	arnA	peptide	ARNA	Pseudomonadaceae	Pseudomonadaceae|arnA	Pseudomonadaceae|peptide
sW1GLT1R2	GLT1R	GLTR	MvaT	multidrug	MVAT	Pseudomonadaceae	Pseudomonadaceae|MvaT	Pseudomonadaceae|multidrug
sW1GLT1R2	GLT1R	GLTR	mexW	multidrug	MEXW	Pseudomonadaceae	Pseudomonadaceae|mexW	Pseudomonadaceae|multidrug
sW1GLT1R2	GLT1R	GLTR	mdtB	multidrug	MDTB	Burkholderiaceae	Burkholderiaceae|mdtB	Burkholderiaceae|multidrug
sW1GLT1R2	GLT1R	GLTR	mexB	multidrug	MEXB	Pseudomonadaceae	Pseudomonadaceae|mexB	Pseudomonadaceae|multidrug
sW1GLT1R2	GLT1R	GLTR	mexA	multidrug	MEXA	Pseudomonadaceae	Pseudomonadaceae|mexA	Pseudomonadaceae|multidrug
sW1GLT1R2	GLT1R	GLTR	oprM	multidrug	OPRM	Moraxellaceae	Moraxellaceae|oprM	Moraxellaceae|multidrug
sW1GLT1R2	GLT1R	GLTR	acrB	multidrug	ACRB	Burkholderiaceae	Burkholderiaceae|acrB	Burkholderiaceae|multidrug
sW1GLT1R2	GLT1R	GLTR	opcM	multidrug	OPCM	Burkholderiaceae	Burkholderiaceae|opcM	Burkholderiaceae|multidrug
sW1GLT1R2	GLT1R	GLTR	ceoB	multidrug	CEOB	Burkholderiaceae	Burkholderiaceae|ceoB	Burkholderiaceae|multidrug
sW1GLT1R2	GLT1R	GLTR	mexE	multidrug	MEXE	Burkholderiaceae	Burkholderiaceae|mexE	Burkholderiaceae|multidrug
sW1GLT1R2	GLT1R	GLTR	mexE	multidrug	MEXE	Burkholderiaceae	Burkholderiaceae|mexE	Burkholderiaceae|multidrug
sW1GLT1R2	GLT1R	GLTR	mdtB	multidrug	MDTB	Enterobacteriaceae	Enterobacteriaceae|mdtB	Enterobacteriaceae|multidrug
sW1GLT1R2	GLT1R	GLTR	bacA	bacitracin	BACA	Pseudomonadaceae	Pseudomonadaceae|bacA	Pseudomonadaceae|bacitracin
sW1GLT1R2	GLT1R	GLTR	MexK	multidrug	MEXK	Comamonadaceae	Comamonadaceae|MexK	Comamonadaceae|multidrug
sW1GLT1R2	GLT1R	GLTR	adeI	multidrug	ADEI	Moraxellaceae	Moraxellaceae|adeI	Moraxellaceae|multidrug
sW1GLT1R2	GLT1R	GLTR	adeJ	multidrug	ADEJ	Moraxellaceae	Moraxellaceae|adeJ	Moraxellaceae|multidrug
sW1GLT1R2	GLT1R	GLTR	adeK	multidrug	ADEK	Moraxellaceae	Moraxellaceae|adeK	Moraxellaceae|multidrug
sW1GLT1R2	GLT1R	GLTR	ceoB	multidrug	CEOB	Sphingomonadaceae	Sphingomonadaceae|ceoB	Sphingomonadaceae|multidrug
sW1GLT1R2	GLT1R	GLTR	bacA	bacitracin	BACA	Comamonadaceae	Comamonadaceae|bacA	Comamonadaceae|bacitracin
sW1GLT1R2	GLT1R	GLTR	aph(3')-I	aminoglycoside	APH(3')-I	Moraxellaceae	Moraxellaceae|aph(3')-I	Moraxellaceae|aminoglycoside
sW1GLT1R2	GLT1R	GLTR	bacA	bacitracin	BACA	Burkholderiaceae	Burkholderiaceae|bacA	Burkholderiaceae|bacitracin
sW1GLT1R2	GLT1R	GLTR	mexE	multidrug	MEXE	Burkholderiaceae	Burkholderiaceae|mexE	Burkholderiaceae|multidrug
sW1GLT1R2	GLT1R	GLTR	OpmH	triclosan	OPMH	Pseudomonadaceae	Pseudomonadaceae|OpmH	Pseudomonadaceae|triclosan
sW1GLT1R2	GLT1R	GLTR	mexB	multidrug	MEXB	Moraxellaceae	Moraxellaceae|mexB	Moraxellaceae|multidrug
sW1GLT1R2	GLT1R	GLTR	mdtB	multidrug	MDTB	Alcaligenaceae	Alcaligenaceae|mdtB	Alcaligenaceae|multidrug
sW1GLT1R2	GLT1R	GLTR	multidrug_ABC_transporter	multidrug	ABC TRANSPORTER	Burkholderiaceae	Burkholderiaceae|multidrug_ABC_transporter	Burkholderiaceae|multidrug
sW1GLT1R2	GLT1R	GLTR	mdfA	multidrug	MDFA	Moraxellaceae	Moraxellaceae|mdfA	Moraxellaceae|multidrug
sW1GLT1R2	GLT1R	GLTR	bpeF	multidrug	BPEF	Burkholderiaceae	Burkholderiaceae|bpeF	Burkholderiaceae|multidrug
sW1GLT1R2	GLT1R	GLTR	bpeF	multidrug	BPEF	Burkholderiaceae	Burkholderiaceae|bpeF	Burkholderiaceae|multidrug
sW1GLT1R2	GLT1R	GLTR	mexF	multidrug	MEXF	Rhodanobacteraceae	Rhodanobacteraceae|mexF	Rhodanobacteraceae|multidrug
sW1GLT1R2	GLT1R	GLTR	bpeF	multidrug	BPEF	Pseudomonadaceae	Pseudomonadaceae|bpeF	Pseudomonadaceae|multidrug
sW1GLT1R2	GLT1R	GLTR	major_facilitator_superfamily_transporter	multidrug	MFST	Moraxellaceae	Moraxellaceae|major_facilitator_superfamily_transporter	Moraxellaceae|multidrug
sW1GLT1R2	GLT1R	GLTR	bacA	bacitracin	BACA	Burkholderiaceae	Burkholderiaceae|bacA	Burkholderiaceae|bacitracin
sW1GLT1R2	GLT1R	GLTR	ceoB	multidrug	CEOB	Alcaligenaceae	Alcaligenaceae|ceoB	Alcaligenaceae|multidrug
sW1GLT1R2	GLT1R	GLTR	mexF	multidrug	MEXF	Acidiferrobacteraceae	Acidiferrobacteraceae|mexF	Acidiferrobacteraceae|multidrug
sW1GLT1R2	GLT1R	GLTR	bacA	bacitracin	BACA	Burkholderiaceae	Burkholderiaceae|bacA	Burkholderiaceae|bacitracin
sW1GLT1R2	GLT1R	GLTR	adeF	multidrug	ADEF	Oxalobacteraceae	Oxalobacteraceae|adeF	Oxalobacteraceae|multidrug
sW1GLT1R2	GLT1R	GLTR	multidrug_ABC_transporter	multidrug	ABC TRANSPORTER	Moraxellaceae	Moraxellaceae|multidrug_ABC_transporter	Moraxellaceae|multidrug
sW1GLT1R2	GLT1R	GLTR	mexE	multidrug	MEXE	Moraxellaceae	Moraxellaceae|mexE	Moraxellaceae|multidrug
sW1GLT1R2	GLT1R	GLTR	rpoB2	multidrug	RPOB2	Streptomycetaceae	Streptomycetaceae|rpoB2	Streptomycetaceae|multidrug
sW1GLT1R2	GLT1R	GLTR	TolC	multidrug	TOLC	Moraxellaceae	Moraxellaceae|TolC	Moraxellaceae|multidrug
sW1GLT1R2	GLT1R	GLTR	mdfA	multidrug	MDFA	Moraxellaceae	Moraxellaceae|mdfA	Moraxellaceae|multidrug
sW1GLT1R2	GLT1R	GLTR	mexB	multidrug	MEXB	Pseudomonadaceae	Pseudomonadaceae|mexB	Pseudomonadaceae|multidrug
sW1GLT1R2	GLT1R	GLTR	adeJ	multidrug	ADEJ	Moraxellaceae	Moraxellaceae|adeJ	Moraxellaceae|multidrug
sW1GLT1R2	GLT1R	GLTR	multidrug_ABC_transporter	multidrug	ABC TRANSPORTER	Moraxellaceae	Moraxellaceae|multidrug_ABC_transporter	Moraxellaceae|multidrug
sW1GLT1R2	GLT1R	GLTR	mexI	multidrug	MEXI	Alcaligenaceae	Alcaligenaceae|mexI	Alcaligenaceae|multidrug
sW1GLT1R2	GLT1R	GLTR	rphB	rifamycin	RPHB	Paenibacillaceae	Paenibacillaceae|rphB	Paenibacillaceae|rifamycin
sW1GLT1R2	GLT1R	GLTR	bpeF	multidrug	BPEF	Burkholderiaceae	Burkholderiaceae|bpeF	Burkholderiaceae|multidrug
sW1GLT1R2	GLT1R	GLTR	mexB	multidrug	MEXB	Moraxellaceae	Moraxellaceae|mexB	Moraxellaceae|multidrug
sW1GLT1R2	GLT1R	GLTR	bacA	bacitracin	BACA	Burkholderiaceae	Burkholderiaceae|bacA	Burkholderiaceae|bacitracin
sW1GLT1R2	GLT1R	GLTR	mdtB	multidrug	MDTB	Unclassified	Unclassified|mdtB	Unclassified|multidrug
sW1GLT1R2	GLT1R	GLTR	rphA	rifamycin	RPHA	Unclassified	Unclassified|rphA	Unclassified|rifamycin
sW1GLT1R2	GLT1R	GLTR	mexB	multidrug	MEXB	Burkholderiaceae	Burkholderiaceae|mexB	Burkholderiaceae|multidrug
sW1GLT1R2	GLT1R	GLTR	ompR	multidrug	OMPR	Moraxellaceae	Moraxellaceae|ompR	Moraxellaceae|multidrug
sW1GLT1R2	GLT1R	GLTR	ceoB	multidrug	CEOB	Burkholderiaceae	Burkholderiaceae|ceoB	Burkholderiaceae|multidrug
sW1GLT1R2	GLT1R	GLTR	oprM	multidrug	OPRM	Moraxellaceae	Moraxellaceae|oprM	Moraxellaceae|multidrug
sW1GLT1R2	GLT1R	GLTR	tetR	tetracycline	TETR	Moraxellaceae	Moraxellaceae|tetR	Moraxellaceae|tetracycline
sW1GLT1R2	GLT1R	GLTR	mdfA	multidrug	MDFA	Moraxellaceae	Moraxellaceae|mdfA	Moraxellaceae|multidrug
sW1GLT1R2	GLT1R	GLTR	mdtC	multidrug	MDTC	Unclassified	Unclassified|mdtC	Unclassified|multidrug
sW1GLT1R2	GLT1R	GLTR	adeF	multidrug	ADEF	Burkholderiaceae	Burkholderiaceae|adeF	Burkholderiaceae|multidrug
sW1GLT1R2	GLT1R	GLTR	mexT	multidrug	MEXT	Moraxellaceae	Moraxellaceae|mexT	Moraxellaceae|multidrug
sW1GLT1R2	GLT1R	GLTR	adeJ	multidrug	ADEJ	Moraxellaceae	Moraxellaceae|adeJ	Moraxellaceae|multidrug
sW1GLT1R2	GLT1R	GLTR	carO	beta-lactam	CARO	Moraxellaceae	Moraxellaceae|carO	Moraxellaceae|beta-lactam
sW1GLT1R2	GLT1R	GLTR	bacA	bacitracin	BACA	Alcaligenaceae	Alcaligenaceae|bacA	Alcaligenaceae|bacitracin
sW1GLT1R2	GLT1R	GLTR	oqxB	multidrug	OQXB	Pseudomonadaceae	Pseudomonadaceae|oqxB	Pseudomonadaceae|multidrug
sW1GLT1R2	GLT1R	GLTR	tetR	tetracycline	TETR	Moraxellaceae	Moraxellaceae|tetR	Moraxellaceae|tetracycline
sW1GLT1R2	GLT1R	GLTR	bacA	bacitracin	BACA	Burkholderiaceae	Burkholderiaceae|bacA	Burkholderiaceae|bacitracin
sW1GLT1R2	GLT1R	GLTR	mexB	multidrug	MEXB	Pseudomonadaceae	Pseudomonadaceae|mexB	Pseudomonadaceae|multidrug
sW1GLT1R2	GLT1R	GLTR	adeF	multidrug	ADEF	Moraxellaceae	Moraxellaceae|adeF	Moraxellaceae|multidrug
sW1GLT1R2	GLT1R	GLTR	adeH	multidrug	ADEH	Moraxellaceae	Moraxellaceae|adeH	Moraxellaceae|multidrug
sW1GLT1R2	GLT1R	GLTR	mexT	multidrug	MEXT	Pseudomonadaceae	Pseudomonadaceae|mexT	Pseudomonadaceae|multidrug
sW1GLT1R2	GLT1R	GLTR	mexF	multidrug	MEXF	Rhodanobacteraceae	Rhodanobacteraceae|mexF	Rhodanobacteraceae|multidrug
sW1GLT1R2	GLT1R	GLTR	ompR	multidrug	OMPR	Moraxellaceae	Moraxellaceae|ompR	Moraxellaceae|multidrug
sW1GLT1R2	GLT1R	GLTR	ceoB	multidrug	CEOB	Burkholderiaceae	Burkholderiaceae|ceoB	Burkholderiaceae|multidrug
sW1GLT1R2	GLT1R	GLTR	mexF	multidrug	MEXF	Oxalobacteraceae	Oxalobacteraceae|mexF	Oxalobacteraceae|multidrug
sW1GLT1R2	GLT1R	GLTR	bpeF	multidrug	BPEF	Burkholderiaceae	Burkholderiaceae|bpeF	Burkholderiaceae|multidrug
sW1GLT1R2	GLT1R	GLTR	adeC	multidrug	ADEC	Moraxellaceae	Moraxellaceae|adeC	Moraxellaceae|multidrug
sW1GLT1R2	GLT1R	GLTR	adeF	multidrug	ADEF	Moraxellaceae	Moraxellaceae|adeF	Moraxellaceae|multidrug
sW1GLT1R2	GLT1R	GLTR	adeH	multidrug	ADEH	Moraxellaceae	Moraxellaceae|adeH	Moraxellaceae|multidrug
sW1GLT1R2	GLT1R	GLTR	ceoB	multidrug	CEOB	Burkholderiaceae	Burkholderiaceae|ceoB	Burkholderiaceae|multidrug
sW1GLT1R2	GLT1R	GLTR	mdtL	multidrug	MDTL	Moraxellaceae	Moraxellaceae|mdtL	Moraxellaceae|multidrug
sW1GLT1R2	GLT1R	GLTR	mexF	multidrug	MEXF	Rhodanobacteraceae	Rhodanobacteraceae|mexF	Rhodanobacteraceae|multidrug
sW1GLT1R2	GLT1R	GLTR	adeJ	multidrug	ADEJ	Moraxellaceae	Moraxellaceae|adeJ	Moraxellaceae|multidrug
sW1GLT1R2	GLT1R	GLTR	ompR	multidrug	OMPR	Moraxellaceae	Moraxellaceae|ompR	Moraxellaceae|multidrug
sW1GLT1R2	GLT1R	GLTR	fosB	fosfomycin	FOSB	Paenibacillaceae	Paenibacillaceae|fosB	Paenibacillaceae|fosfomycin
sW1GLT1R2	GLT1R	GLTR	ceoB	multidrug	CEOB	Burkholderiaceae	Burkholderiaceae|ceoB	Burkholderiaceae|multidrug
sW1GLT1R2	GLT1R	GLTR	mexB	multidrug	MEXB	Burkholderiaceae	Burkholderiaceae|mexB	Burkholderiaceae|multidrug
sW1GLT1R2	GLT1R	GLTR	mexF	multidrug	MEXF	Rhodanobacteraceae	Rhodanobacteraceae|mexF	Rhodanobacteraceae|multidrug
sW1GLT1R2	GLT1R	GLTR	cat_chloramphenicol_acetyltransferase	phenicol	CAT	Unclassified	Unclassified|cat_chloramphenicol_acetyltransferase	Unclassified|phenicol
sW1GLT1R2	GLT1R	GLTR	adeJ	multidrug	ADEJ	Moraxellaceae	Moraxellaceae|adeJ	Moraxellaceae|multidrug
sW1GLT1R2	GLT1R	GLTR	adeJ	multidrug	ADEJ	Moraxellaceae	Moraxellaceae|adeJ	Moraxellaceae|multidrug
sW1GLT1R2	GLT1R	GLTR	ceoB	multidrug	CEOB	Burkholderiaceae	Burkholderiaceae|ceoB	Burkholderiaceae|multidrug
sW1GLT1R2	GLT1R	GLTR	acrB	multidrug	ACRB	Burkholderiaceae	Burkholderiaceae|acrB	Burkholderiaceae|multidrug
sW1GLT1R2	GLT1R	GLTR	adeN	multidrug	ADEN	Moraxellaceae	Moraxellaceae|adeN	Moraxellaceae|multidrug
sW1GLT1R2	GLT1R	GLTR	adeN	multidrug	ADEN	Moraxellaceae	Moraxellaceae|adeN	Moraxellaceae|multidrug
sW1GLT1R2	GLT1R	GLTR	rpoB2	multidrug	RPOB2	Streptomycetaceae	Streptomycetaceae|rpoB2	Streptomycetaceae|multidrug
sW1GLT1R2	GLT1R	GLTR	mexB	multidrug	MEXB	Pseudomonadaceae	Pseudomonadaceae|mexB	Pseudomonadaceae|multidrug
sW1GLT1R2	GLT1R	GLTR	major_facilitator_superfamily_transporter	multidrug	MFST	Moraxellaceae	Moraxellaceae|major_facilitator_superfamily_transporter	Moraxellaceae|multidrug
sW1GLT1R2	GLT1R	GLTR	mexF	multidrug	MEXF	Alcaligenaceae	Alcaligenaceae|mexF	Alcaligenaceae|multidrug
sW1GLT1R2	GLT1R	GLTR	vanR	glycopeptide	VANR	Unclassified	Unclassified|vanR	Unclassified|glycopeptide
sW1GLT1R2	GLT1R	GLTR	mtrA	multidrug	MTRA	Streptomycetaceae	Streptomycetaceae|mtrA	Streptomycetaceae|multidrug
sW1GLT1R2	GLT1R	GLTR	bacA	bacitracin	BACA	Burkholderiaceae	Burkholderiaceae|bacA	Burkholderiaceae|bacitracin
sW1GLT1R2	GLT1R	GLTR	mexE	multidrug	MEXE	Moraxellaceae	Moraxellaceae|mexE	Moraxellaceae|multidrug
sW1GLT1R2	GLT1R	GLTR	abeM	multidrug	ABEM	Moraxellaceae	Moraxellaceae|abeM	Moraxellaceae|multidrug
sW1GLT1R2	GLT1R	GLTR	rpoB2	multidrug	RPOB2	Sinobacteraceae	Sinobacteraceae|rpoB2	Sinobacteraceae|multidrug
sW1GLT1R2	GLT1R	GLTR	adeJ	multidrug	ADEJ	Moraxellaceae	Moraxellaceae|adeJ	Moraxellaceae|multidrug
sW1GLT1R2	GLT1R	GLTR	oleC	MLS	OLEC	Streptomycetaceae	Streptomycetaceae|oleC	Streptomycetaceae|MLS
sW1GLT1R2	GLT1R	GLTR	rosA	fosmidomycin	ROSA	Burkholderiaceae	Burkholderiaceae|rosA	Burkholderiaceae|fosmidomycin
sW1GLT1R2	GLT1R	GLTR	adeS	multidrug	ADES	Moraxellaceae	Moraxellaceae|adeS	Moraxellaceae|multidrug
sW1GLT1R2	GLT1R	GLTR	adeR	multidrug	ADER	Moraxellaceae	Moraxellaceae|adeR	Moraxellaceae|multidrug
sW1GLT1R2	GLT1R	GLTR	adeA	multidrug	ADEA	Moraxellaceae	Moraxellaceae|adeA	Moraxellaceae|multidrug
sW1GLT1R2	GLT1R	GLTR	adeB	multidrug	ADEB	Moraxellaceae	Moraxellaceae|adeB	Moraxellaceae|multidrug
sW1GLT1R2	GLT1R	GLTR	adeC	multidrug	ADEC	Moraxellaceae	Moraxellaceae|adeC	Moraxellaceae|multidrug
sW1GLT1R2	GLT1R	GLTR	mexE	multidrug	MEXE	Burkholderiaceae	Burkholderiaceae|mexE	Burkholderiaceae|multidrug
sW1GLT1R2	GLT1R	GLTR	abeM	multidrug	ABEM	Moraxellaceae	Moraxellaceae|abeM	Moraxellaceae|multidrug
sW1GLT1R2	GLT1R	GLTR	MexK	multidrug	MEXK	Pseudomonadaceae	Pseudomonadaceae|MexK	Pseudomonadaceae|multidrug
sW1GLT1R2	GLT1R	GLTR	tetA(48)	tetracycline	TETA(48)	Paenibacillaceae	Paenibacillaceae|tetA(48)	Paenibacillaceae|tetracycline
sW1GLT1R2	GLT1R	GLTR	OXA-421	beta-lactam	OXA	Moraxellaceae	Moraxellaceae|OXA	Moraxellaceae|beta-lactam
sW1GLT1R2	GLT1R	GLTR	bacA	bacitracin	BACA	Burkholderiaceae	Burkholderiaceae|bacA	Burkholderiaceae|bacitracin
sW1GLT1R2	GLT1R	GLTR	bpeF	multidrug	BPEF	Burkholderiaceae	Burkholderiaceae|bpeF	Burkholderiaceae|multidrug
sW1GLT1R2	GLT1R	GLTR	ceoB	multidrug	CEOB	Burkholderiaceae	Burkholderiaceae|ceoB	Burkholderiaceae|multidrug
sW1GLT1R2	GLT1R	GLTR	bacA	bacitracin	BACA	Burkholderiaceae	Burkholderiaceae|bacA	Burkholderiaceae|bacitracin
sW1GLT1R2	GLT1R	GLTR	mexB	multidrug	MEXB	Moraxellaceae	Moraxellaceae|mexB	Moraxellaceae|multidrug
sW1GLT1R2	GLT1R	GLTR	mexB	multidrug	MEXB	Moraxellaceae	Moraxellaceae|mexB	Moraxellaceae|multidrug
sW1GLT1R2	GLT1R	GLTR	smeB	multidrug	SMEB	Sphingomonadaceae	Sphingomonadaceae|smeB	Sphingomonadaceae|multidrug
sW1GLT1R2	GLT1R	GLTR	mexF	multidrug	MEXF	Rhodanobacteraceae	Rhodanobacteraceae|mexF	Rhodanobacteraceae|multidrug
sW1GLT1R2	GLT1R	GLTR	adeK	multidrug	ADEK	Moraxellaceae	Moraxellaceae|adeK	Moraxellaceae|multidrug
sW1GLT1R2	GLT1R	GLTR	adeJ	multidrug	ADEJ	Moraxellaceae	Moraxellaceae|adeJ	Moraxellaceae|multidrug
sW1GLT1R2	GLT1R	GLTR	ADC-22	beta-lactam	ADC-22	Moraxellaceae	Moraxellaceae|ADC-22	Moraxellaceae|beta-lactam
sW1GLT1R2	GLT1R	GLTR	macA	MLS	MACA	Moraxellaceae	Moraxellaceae|macA	Moraxellaceae|MLS
sW1GLT1R2	GLT1R	GLTR	macA	MLS	MACA	Moraxellaceae	Moraxellaceae|macA	Moraxellaceae|MLS
sW1GLT1R2	GLT1R	GLTR	macA	MLS	MACA	Moraxellaceae	Moraxellaceae|macA	Moraxellaceae|MLS
sW1GLT1R2	GLT1R	GLTR	mdtB	multidrug	MDTB	Oxalobacteraceae	Oxalobacteraceae|mdtB	Oxalobacteraceae|multidrug
sW1GLT1R2	GLT1R	GLTR	ceoB	multidrug	CEOB	Burkholderiaceae	Burkholderiaceae|ceoB	Burkholderiaceae|multidrug
sW1GLT1R2	GLT1R	GLTR	lsa	MLS	LSA	Paenibacillaceae	Paenibacillaceae|lsa	Paenibacillaceae|MLS
sW1GLT1R2	GLT1R	GLTR	ceoB	multidrug	CEOB	Burkholderiaceae	Burkholderiaceae|ceoB	Burkholderiaceae|multidrug
sW1GLT1R2	GLT1R	GLTR	adeJ	multidrug	ADEJ	Moraxellaceae	Moraxellaceae|adeJ	Moraxellaceae|multidrug
sW1GLT1R2	GLT1R	GLTR	adeJ	multidrug	ADEJ	Moraxellaceae	Moraxellaceae|adeJ	Moraxellaceae|multidrug
sW1GLT1R2	GLT1R	GLTR	macA	MLS	MACA	Moraxellaceae	Moraxellaceae|macA	Moraxellaceae|MLS
sW1GLT1R2	GLT1R	GLTR	ceoB	multidrug	CEOB	Burkholderiaceae	Burkholderiaceae|ceoB	Burkholderiaceae|multidrug
sW1GLT1R2	GLT1R	GLTR	bpeF	multidrug	BPEF	Burkholderiaceae	Burkholderiaceae|bpeF	Burkholderiaceae|multidrug
sW1GLT1R2	GLT1R	GLTR	bpeF	multidrug	BPEF	Burkholderiaceae	Burkholderiaceae|bpeF	Burkholderiaceae|multidrug
sW1GLT1R2	GLT1R	GLTR	vanX	glycopeptide	VANX	Streptomycetaceae	Streptomycetaceae|vanX	Streptomycetaceae|glycopeptide
sW1GLT1R2	GLT1R	GLTR	ceoB	multidrug	CEOB	Burkholderiaceae	Burkholderiaceae|ceoB	Burkholderiaceae|multidrug
sW1GLT1R2	GLT1R	GLTR	mexB	multidrug	MEXB	Moraxellaceae	Moraxellaceae|mexB	Moraxellaceae|multidrug
sW1GLT1R2	GLT1R	GLTR	ANT(3'')-IIa	aminoglycoside	ANT(3'')-IIA	Moraxellaceae	Moraxellaceae|ANT(3'')-IIa	Moraxellaceae|aminoglycoside
sW1GLT1R2	GLT1R	GLTR	ceoB	multidrug	CEOB	Burkholderiaceae	Burkholderiaceae|ceoB	Burkholderiaceae|multidrug
sW1GLT1R2	GLT1R	GLTR	adeF	multidrug	ADEF	Oxalobacteraceae	Oxalobacteraceae|adeF	Oxalobacteraceae|multidrug
sW1GLT1R2	GLT1R	GLTR	adeF	multidrug	ADEF	Alcaligenaceae	Alcaligenaceae|adeF	Alcaligenaceae|multidrug
sW1GLT1R2	GLT1R	GLTR	vanR	glycopeptide	VANR	Paenibacillaceae	Paenibacillaceae|vanR	Paenibacillaceae|glycopeptide
sW1GLT1R2	GLT1R	GLTR	adeN	multidrug	ADEN	Moraxellaceae	Moraxellaceae|adeN	Moraxellaceae|multidrug
sW1GLT1R2	GLT1R	GLTR	adeB	multidrug	ADEB	Moraxellaceae	Moraxellaceae|adeB	Moraxellaceae|multidrug
sW1GLT1R2	GLT1R	GLTR	adeB	multidrug	ADEB	Moraxellaceae	Moraxellaceae|adeB	Moraxellaceae|multidrug
sW1GLT1R2	GLT1R	GLTR	bacA	bacitracin	BACA	Burkholderiaceae	Burkholderiaceae|bacA	Burkholderiaceae|bacitracin
sW1GLT1R2	GLT1R	GLTR	bpeF	multidrug	BPEF	Burkholderiaceae	Burkholderiaceae|bpeF	Burkholderiaceae|multidrug
sW1GLT1R2	GLT1R	GLTR	mexN	multidrug	MEXN	Pseudomonadaceae	Pseudomonadaceae|mexN	Pseudomonadaceae|multidrug
sW1GLT1R2	GLT1R	GLTR	rphB	rifamycin	RPHB	Paenibacillaceae	Paenibacillaceae|rphB	Paenibacillaceae|rifamycin
sW1GLT1R2	GLT1R	GLTR	oqxB	multidrug	OQXB	Burkholderiaceae	Burkholderiaceae|oqxB	Burkholderiaceae|multidrug
sW1GLT1R2	GLT1R	GLTR	ceoB	multidrug	CEOB	Burkholderiaceae	Burkholderiaceae|ceoB	Burkholderiaceae|multidrug
sW1GLT1R2	GLT1R	GLTR	adeJ	multidrug	ADEJ	Moraxellaceae	Moraxellaceae|adeJ	Moraxellaceae|multidrug
sW1GLT1R2	GLT1R	GLTR	emrB	multidrug	EMRB	Moraxellaceae	Moraxellaceae|emrB	Moraxellaceae|multidrug
sW1GLT1R2	GLT1R	GLTR	mexX	multidrug	MEXX	Burkholderiaceae	Burkholderiaceae|mexX	Burkholderiaceae|multidrug
sW1GLT1R2	GLT1R	GLTR	amrB	multidrug	AMRB	Burkholderiaceae	Burkholderiaceae|amrB	Burkholderiaceae|multidrug
sW1GLT1R2	GLT1R	GLTR	rosA	fosmidomycin	ROSA	Rhodanobacteraceae	Rhodanobacteraceae|rosA	Rhodanobacteraceae|fosmidomycin
sW1GLT1R2	GLT1R	GLTR	bpeF	multidrug	BPEF	Burkholderiaceae	Burkholderiaceae|bpeF	Burkholderiaceae|multidrug
sW1GLT1R2	GLT1R	GLTR	mexE	multidrug	MEXE	Burkholderiaceae	Burkholderiaceae|mexE	Burkholderiaceae|multidrug
sW1GLT1R2	GLT1R	GLTR	bpeF	multidrug	BPEF	Burkholderiaceae	Burkholderiaceae|bpeF	Burkholderiaceae|multidrug
sW1GLT1R2	GLT1R	GLTR	mdtL	multidrug	MDTL	Moraxellaceae	Moraxellaceae|mdtL	Moraxellaceae|multidrug
sW1GLT1R2	GLT1R	GLTR	rosA	fosmidomycin	ROSA	Rhodanobacteraceae	Rhodanobacteraceae|rosA	Rhodanobacteraceae|fosmidomycin
sW1GLT1R2	GLT1R	GLTR	abeS	multidrug	ABES	Moraxellaceae	Moraxellaceae|abeS	Moraxellaceae|multidrug
sW1GLT1R2	GLT1R	GLTR	mexB	multidrug	MEXB	Moraxellaceae	Moraxellaceae|mexB	Moraxellaceae|multidrug
sW1GLT1R2	GLT1R	GLTR	mexF	multidrug	MEXF	Rhodanobacteraceae	Rhodanobacteraceae|mexF	Rhodanobacteraceae|multidrug
sW1GLT1R2	GLT1R	GLTR	mexF	multidrug	MEXF	Rhodanobacteraceae	Rhodanobacteraceae|mexF	Rhodanobacteraceae|multidrug
sW1GLT1R2	GLT1R	GLTR	mexE	multidrug	MEXE	Burkholderiaceae	Burkholderiaceae|mexE	Burkholderiaceae|multidrug
sW1GLT1R2	GLT1R	GLTR	bpeF	multidrug	BPEF	Burkholderiaceae	Burkholderiaceae|bpeF	Burkholderiaceae|multidrug
sW1GLT1R2	GLT1R	GLTR	mexF	multidrug	MEXF	Alcaligenaceae	Alcaligenaceae|mexF	Alcaligenaceae|multidrug
sW1GLT1R2	GLT1R	GLTR	mdtB	multidrug	MDTB	Unclassified	Unclassified|mdtB	Unclassified|multidrug
sW1GLT1R2	GLT1R	GLTR	ompR	multidrug	OMPR	Moraxellaceae	Moraxellaceae|ompR	Moraxellaceae|multidrug
sW1GLT1R2	GLT1R	GLTR	rosA	fosmidomycin	ROSA	Comamonadaceae	Comamonadaceae|rosA	Comamonadaceae|fosmidomycin
sW1GLT1R2	GLT1R	GLTR	abeS	multidrug	ABES	Moraxellaceae	Moraxellaceae|abeS	Moraxellaceae|multidrug
sW1GLT1R2	GLT1R	GLTR	marR	multidrug	MARR	Moraxellaceae	Moraxellaceae|marR	Moraxellaceae|multidrug
sW1GLT1R2	GLT1R	GLTR	adeI	multidrug	ADEI	Moraxellaceae	Moraxellaceae|adeI	Moraxellaceae|multidrug
sW1GLT1R2	GLT1R	GLTR	adeJ	multidrug	ADEJ	Moraxellaceae	Moraxellaceae|adeJ	Moraxellaceae|multidrug
sW1GLT1R2	GLT1R	GLTR	macA	MLS	MACA	Moraxellaceae	Moraxellaceae|macA	Moraxellaceae|MLS
sW1GLT1R2	GLT1R	GLTR	multidrug_ABC_transporter	multidrug	ABC TRANSPORTER	Streptomycetaceae	Streptomycetaceae|multidrug_ABC_transporter	Streptomycetaceae|multidrug
sW1GLT1R2	GLT1R	GLTR	adeJ	multidrug	ADEJ	Moraxellaceae	Moraxellaceae|adeJ	Moraxellaceae|multidrug
sW1GLT1R2	GLT1R	GLTR	adeJ	multidrug	ADEJ	Moraxellaceae	Moraxellaceae|adeJ	Moraxellaceae|multidrug
sW1GLT1R2	GLT1R	GLTR	marR	multidrug	MARR	Moraxellaceae	Moraxellaceae|marR	Moraxellaceae|multidrug
sW1GLT1R2	GLT1R	GLTR	mdfA	multidrug	MDFA	Moraxellaceae	Moraxellaceae|mdfA	Moraxellaceae|multidrug
sW1GLT1R2	GLT1R	GLTR	major_facilitator_superfamily_transporter	multidrug	MFST	Nitrobacteraceae	Nitrobacteraceae|major_facilitator_superfamily_transporter	Nitrobacteraceae|multidrug
sW1GLT1R2	GLT1R	GLTR	MuxB	multidrug	MUXB	Burkholderiaceae	Burkholderiaceae|MuxB	Burkholderiaceae|multidrug
sW1GLT1R2	GLT1R	GLTR	acrB	multidrug	ACRB	Sphingomonadaceae	Sphingomonadaceae|acrB	Sphingomonadaceae|multidrug
sW1GLT1R2	GLT1R	GLTR	ceoB	multidrug	CEOB	Burkholderiaceae	Burkholderiaceae|ceoB	Burkholderiaceae|multidrug
sW1GLT1R2	GLT1R	GLTR	mexW	multidrug	MEXW	Nitrobacteraceae	Nitrobacteraceae|mexW	Nitrobacteraceae|multidrug
sW1GLT1R2	GLT1R	GLTR	mdtK	multidrug	MDTK	Moraxellaceae	Moraxellaceae|mdtK	Moraxellaceae|multidrug
sW1GLT1R2	GLT1R	GLTR	ceoB	multidrug	CEOB	Burkholderiaceae	Burkholderiaceae|ceoB	Burkholderiaceae|multidrug
sW1GLT1S1	GLT1S	GLTS	oprC	multidrug	OPRC	Burkholderiaceae	Burkholderiaceae|oprC	Burkholderiaceae|multidrug
sW1GLT1S1	GLT1S	GLTS	mexB	multidrug	MEXB	Pseudomonadaceae	Pseudomonadaceae|mexB	Pseudomonadaceae|multidrug
sW1GLT1S1	GLT1S	GLTS	bpeF	multidrug	BPEF	Burkholderiaceae	Burkholderiaceae|bpeF	Burkholderiaceae|multidrug
sW1GLT1S1	GLT1S	GLTS	bacA	bacitracin	BACA	Pseudomonadaceae	Pseudomonadaceae|bacA	Pseudomonadaceae|bacitracin
sW1GLT1S1	GLT1S	GLTS	mexT	multidrug	MEXT	Pseudomonadaceae	Pseudomonadaceae|mexT	Pseudomonadaceae|multidrug
sW1GLT1S1	GLT1S	GLTS	mexF	multidrug	MEXF	Rhodanobacteraceae	Rhodanobacteraceae|mexF	Rhodanobacteraceae|multidrug
sW1GLT1S1	GLT1S	GLTS	rphB	rifamycin	RPHB	Unclassified	Unclassified|rphB	Unclassified|rifamycin
sW1GLT1S1	GLT1S	GLTS	oprC	multidrug	OPRC	Burkholderiaceae	Burkholderiaceae|oprC	Burkholderiaceae|multidrug
sW1GLT1S1	GLT1S	GLTS	bacA	bacitracin	BACA	Burkholderiaceae	Burkholderiaceae|bacA	Burkholderiaceae|bacitracin
sW1GLT1S1	GLT1S	GLTS	opcM	multidrug	OPCM	Burkholderiaceae	Burkholderiaceae|opcM	Burkholderiaceae|multidrug
sW1GLT1S1	GLT1S	GLTS	ceoB	multidrug	CEOB	Burkholderiaceae	Burkholderiaceae|ceoB	Burkholderiaceae|multidrug
sW1GLT1S1	GLT1S	GLTS	mexE	multidrug	MEXE	Burkholderiaceae	Burkholderiaceae|mexE	Burkholderiaceae|multidrug
sW1GLT1S1	GLT1S	GLTS	ANT(3'')-IIa	aminoglycoside	ANT(3'')-IIA	Moraxellaceae	Moraxellaceae|ANT(3'')-IIa	Moraxellaceae|aminoglycoside
sW1GLT1S1	GLT1S	GLTS	adeF	multidrug	ADEF	Alcaligenaceae	Alcaligenaceae|adeF	Alcaligenaceae|multidrug
sW1GLT1S1	GLT1S	GLTS	mdtB	multidrug	MDTB	Nitrobacteraceae	Nitrobacteraceae|mdtB	Nitrobacteraceae|multidrug
sW1GLT1S1	GLT1S	GLTS	mexT	multidrug	MEXT	Moraxellaceae	Moraxellaceae|mexT	Moraxellaceae|multidrug
sW1GLT1S1	GLT1S	GLTS	emrB	multidrug	EMRB	Moraxellaceae	Moraxellaceae|emrB	Moraxellaceae|multidrug
sW1GLT1S1	GLT1S	GLTS	bpeF	multidrug	BPEF	Burkholderiaceae	Burkholderiaceae|bpeF	Burkholderiaceae|multidrug
sW1GLT1S1	GLT1S	GLTS	bacA	bacitracin	BACA	Burkholderiaceae	Burkholderiaceae|bacA	Burkholderiaceae|bacitracin
sW1GLT1S1	GLT1S	GLTS	ceoB	multidrug	CEOB	Burkholderiaceae	Burkholderiaceae|ceoB	Burkholderiaceae|multidrug
sW1GLT1S1	GLT1S	GLTS	mexE	multidrug	MEXE	Burkholderiaceae	Burkholderiaceae|mexE	Burkholderiaceae|multidrug
sW1GLT1S1	GLT1S	GLTS	mdtB	multidrug	MDTB	Oxalobacteraceae	Oxalobacteraceae|mdtB	Oxalobacteraceae|multidrug
sW1GLT1S1	GLT1S	GLTS	adeF	multidrug	ADEF	Alcaligenaceae	Alcaligenaceae|adeF	Alcaligenaceae|multidrug
sW1GLT1S1	GLT1S	GLTS	arnA	peptide	ARNA	Pseudomonadaceae	Pseudomonadaceae|arnA	Pseudomonadaceae|peptide
sW1GLT1S1	GLT1S	GLTS	mexT	multidrug	MEXT	Pseudomonadaceae	Pseudomonadaceae|mexT	Pseudomonadaceae|multidrug
sW1GLT1S1	GLT1S	GLTS	aadK	aminoglycoside	AADK	Paenibacillaceae	Paenibacillaceae|aadK	Paenibacillaceae|aminoglycoside
sW1GLT1S1	GLT1S	GLTS	mexN	multidrug	MEXN	Pseudomonadaceae	Pseudomonadaceae|mexN	Pseudomonadaceae|multidrug
sW1GLT1S1	GLT1S	GLTS	mexF	multidrug	MEXF	Rhodanobacteraceae	Rhodanobacteraceae|mexF	Rhodanobacteraceae|multidrug
sW1GLT1S1	GLT1S	GLTS	cat_chloramphenicol_acetyltransferase	phenicol	CAT	Paenibacillaceae	Paenibacillaceae|cat_chloramphenicol_acetyltransferase	Paenibacillaceae|phenicol
sW1GLT1S1	GLT1S	GLTS	mexB	multidrug	MEXB	Burkholderiaceae	Burkholderiaceae|mexB	Burkholderiaceae|multidrug
sW1GLT1S1	GLT1S	GLTS	mdtB	multidrug	MDTB	Comamonadaceae	Comamonadaceae|mdtB	Comamonadaceae|multidrug
sW1GLT1S1	GLT1S	GLTS	bacA	bacitracin	BACA	Alcaligenaceae	Alcaligenaceae|bacA	Alcaligenaceae|bacitracin
sW1GLT1S1	GLT1S	GLTS	bpeF	multidrug	BPEF	Burkholderiaceae	Burkholderiaceae|bpeF	Burkholderiaceae|multidrug
sW1GLT1S1	GLT1S	GLTS	mexB	multidrug	MEXB	Pseudomonadaceae	Pseudomonadaceae|mexB	Pseudomonadaceae|multidrug
sW1GLT1S1	GLT1S	GLTS	ceoB	multidrug	CEOB	Burkholderiaceae	Burkholderiaceae|ceoB	Burkholderiaceae|multidrug
sW1GLT1S1	GLT1S	GLTS	marR	multidrug	MARR	Moraxellaceae	Moraxellaceae|marR	Moraxellaceae|multidrug
sW1GLT1S1	GLT1S	GLTS	adeC	multidrug	ADEC	Moraxellaceae	Moraxellaceae|adeC	Moraxellaceae|multidrug
sW1GLT1S1	GLT1S	GLTS	adeB	multidrug	ADEB	Moraxellaceae	Moraxellaceae|adeB	Moraxellaceae|multidrug
sW1GLT1S1	GLT1S	GLTS	adeA	multidrug	ADEA	Moraxellaceae	Moraxellaceae|adeA	Moraxellaceae|multidrug
sW1GLT1S1	GLT1S	GLTS	adeR	multidrug	ADER	Moraxellaceae	Moraxellaceae|adeR	Moraxellaceae|multidrug
sW1GLT1S1	GLT1S	GLTS	adeS	multidrug	ADES	Moraxellaceae	Moraxellaceae|adeS	Moraxellaceae|multidrug
sW1GLT1S1	GLT1S	GLTS	opcM	multidrug	OPCM	Burkholderiaceae	Burkholderiaceae|opcM	Burkholderiaceae|multidrug
sW1GLT1S1	GLT1S	GLTS	adeF	multidrug	ADEF	Alcaligenaceae	Alcaligenaceae|adeF	Alcaligenaceae|multidrug
sW1GLT1S1	GLT1S	GLTS	rpoB2	multidrug	RPOB2	Oxalobacteraceae	Oxalobacteraceae|rpoB2	Oxalobacteraceae|multidrug
sW1GLT1S1	GLT1S	GLTS	bpeF	multidrug	BPEF	Burkholderiaceae	Burkholderiaceae|bpeF	Burkholderiaceae|multidrug
sW1GLT1S1	GLT1S	GLTS	ceoB	multidrug	CEOB	Burkholderiaceae	Burkholderiaceae|ceoB	Burkholderiaceae|multidrug
sW1GLT1S1	GLT1S	GLTS	tetR	tetracycline	TETR	Moraxellaceae	Moraxellaceae|tetR	Moraxellaceae|tetracycline
sW1GLT1S1	GLT1S	GLTS	OXA-421	beta-lactam	OXA	Moraxellaceae	Moraxellaceae|OXA	Moraxellaceae|beta-lactam
sW1GLT1S1	GLT1S	GLTS	ceoB	multidrug	CEOB	Burkholderiaceae	Burkholderiaceae|ceoB	Burkholderiaceae|multidrug
sW1GLT1S1	GLT1S	GLTS	bacA	bacitracin	BACA	Pseudomonadaceae	Pseudomonadaceae|bacA	Pseudomonadaceae|bacitracin
sW1GLT1S1	GLT1S	GLTS	adeJ	multidrug	ADEJ	Moraxellaceae	Moraxellaceae|adeJ	Moraxellaceae|multidrug
sW1GLT1S1	GLT1S	GLTS	mexI	multidrug	MEXI	Sphingomonadaceae	Sphingomonadaceae|mexI	Sphingomonadaceae|multidrug
sW1GLT1S1	GLT1S	GLTS	rphB	rifamycin	RPHB	Sphingobacteriaceae	Sphingobacteriaceae|rphB	Sphingobacteriaceae|rifamycin
sW1GLT1S1	GLT1S	GLTS	vanR	glycopeptide	VANR	Paenibacillaceae	Paenibacillaceae|vanR	Paenibacillaceae|glycopeptide
sW1GLT1S1	GLT1S	GLTS	bpeF	multidrug	BPEF	Burkholderiaceae	Burkholderiaceae|bpeF	Burkholderiaceae|multidrug
sW1GLT1S1	GLT1S	GLTS	bpeF	multidrug	BPEF	Rhodanobacteraceae	Rhodanobacteraceae|bpeF	Rhodanobacteraceae|multidrug
sW1GLT1S1	GLT1S	GLTS	mexF	multidrug	MEXF	Rhodanobacteraceae	Rhodanobacteraceae|mexF	Rhodanobacteraceae|multidrug
sW1GLT1S1	GLT1S	GLTS	bacA	bacitracin	BACA	Burkholderiaceae	Burkholderiaceae|bacA	Burkholderiaceae|bacitracin
sW1GLT1S1	GLT1S	GLTS	rphB	rifamycin	RPHB	Bacillaceae	Bacillaceae|rphB	Bacillaceae|rifamycin
sW1GLT1S1	GLT1S	GLTS	ceoB	multidrug	CEOB	Burkholderiaceae	Burkholderiaceae|ceoB	Burkholderiaceae|multidrug
sW1GLT1S1	GLT1S	GLTS	bacA	bacitracin	BACA	Burkholderiaceae	Burkholderiaceae|bacA	Burkholderiaceae|bacitracin
sW1GLT1S1	GLT1S	GLTS	vanS	glycopeptide	VANS	Paenibacillaceae	Paenibacillaceae|vanS	Paenibacillaceae|glycopeptide
sW1GLT1S1	GLT1S	GLTS	multidrug_ABC_transporter	multidrug	ABC TRANSPORTER	Moraxellaceae	Moraxellaceae|multidrug_ABC_transporter	Moraxellaceae|multidrug
sW1GLT1S1	GLT1S	GLTS	mexB	multidrug	MEXB	Pseudomonadaceae	Pseudomonadaceae|mexB	Pseudomonadaceae|multidrug
sW1GLT1S1	GLT1S	GLTS	mexA	multidrug	MEXA	Pseudomonadaceae	Pseudomonadaceae|mexA	Pseudomonadaceae|multidrug
sW1GLT1S1	GLT1S	GLTS	lsa	MLS	LSA	Paenibacillaceae	Paenibacillaceae|lsa	Paenibacillaceae|MLS
sW1GLT1S1	GLT1S	GLTS	MexK	multidrug	MEXK	Pseudomonadaceae	Pseudomonadaceae|MexK	Pseudomonadaceae|multidrug
sW1GLT1S1	GLT1S	GLTS	ceoB	multidrug	CEOB	Burkholderiaceae	Burkholderiaceae|ceoB	Burkholderiaceae|multidrug
sW1GLT1S1	GLT1S	GLTS	MuxB	multidrug	MUXB	Pseudomonadaceae	Pseudomonadaceae|MuxB	Pseudomonadaceae|multidrug
sW1GLT1S1	GLT1S	GLTS	ompR	multidrug	OMPR	Moraxellaceae	Moraxellaceae|ompR	Moraxellaceae|multidrug
sW1GLT1S1	GLT1S	GLTS	adeI	multidrug	ADEI	Moraxellaceae	Moraxellaceae|adeI	Moraxellaceae|multidrug
sW1GLT1S1	GLT1S	GLTS	rosA	fosmidomycin	ROSA	Burkholderiaceae	Burkholderiaceae|rosA	Burkholderiaceae|fosmidomycin
sW1GLT1S1	GLT1S	GLTS	vanR	glycopeptide	VANR	Pseudonocardiaceae	Pseudonocardiaceae|vanR	Pseudonocardiaceae|glycopeptide
sW1GLT1S1	GLT1S	GLTS	mexW	multidrug	MEXW	Pseudomonadaceae	Pseudomonadaceae|mexW	Pseudomonadaceae|multidrug
sW1GLT1S1	GLT1S	GLTS	major_facilitator_superfamily_transporter	multidrug	MFST	Moraxellaceae	Moraxellaceae|major_facilitator_superfamily_transporter	Moraxellaceae|multidrug
sW1GLT1S1	GLT1S	GLTS	aph(3')-I	aminoglycoside	APH(3')-I	Moraxellaceae	Moraxellaceae|aph(3')-I	Moraxellaceae|aminoglycoside
sW1GLT1S1	GLT1S	GLTS	TolC	multidrug	TOLC	Moraxellaceae	Moraxellaceae|TolC	Moraxellaceae|multidrug
sW1GLT1S1	GLT1S	GLTS	mexE	multidrug	MEXE	Burkholderiaceae	Burkholderiaceae|mexE	Burkholderiaceae|multidrug
sW1GLT1S1	GLT1S	GLTS	ceoB	multidrug	CEOB	Burkholderiaceae	Burkholderiaceae|ceoB	Burkholderiaceae|multidrug
sW1GLT1S1	GLT1S	GLTS	mexE	multidrug	MEXE	Pseudomonadaceae	Pseudomonadaceae|mexE	Pseudomonadaceae|multidrug
sW1GLT1S1	GLT1S	GLTS	mexF	multidrug	MEXF	Pseudomonadaceae	Pseudomonadaceae|mexF	Pseudomonadaceae|multidrug
sW1GLT1S1	GLT1S	GLTS	MuxB	multidrug	MUXB	Burkholderiaceae	Burkholderiaceae|MuxB	Burkholderiaceae|multidrug
sW1GLT1S1	GLT1S	GLTS	mexE	multidrug	MEXE	Burkholderiaceae	Burkholderiaceae|mexE	Burkholderiaceae|multidrug
sW1GLT1S1	GLT1S	GLTS	bpeF	multidrug	BPEF	Burkholderiaceae	Burkholderiaceae|bpeF	Burkholderiaceae|multidrug
sW1GLT1S1	GLT1S	GLTS	rphB	rifamycin	RPHB	Thermoactinomycetaceae	Thermoactinomycetaceae|rphB	Thermoactinomycetaceae|rifamycin
sW1GLT1S1	GLT1S	GLTS	bacA	bacitracin	BACA	Comamonadaceae	Comamonadaceae|bacA	Comamonadaceae|bacitracin
sW1GLT1S1	GLT1S	GLTS	emrA	multidrug	EMRA	Rhodospirillaceae	Rhodospirillaceae|emrA	Rhodospirillaceae|multidrug
sW1GLT1S1	GLT1S	GLTS	tetA(48)	tetracycline	TETA(48)	Microbacteriaceae	Microbacteriaceae|tetA(48)	Microbacteriaceae|tetracycline
sW1GLT1S1	GLT1S	GLTS	mexW	multidrug	MEXW	Pseudomonadaceae	Pseudomonadaceae|mexW	Pseudomonadaceae|multidrug
sW1GLT1S1	GLT1S	GLTS	MvaT	multidrug	MVAT	Pseudomonadaceae	Pseudomonadaceae|MvaT	Pseudomonadaceae|multidrug
sW1GLT1S1	GLT1S	GLTS	adeI	multidrug	ADEI	Moraxellaceae	Moraxellaceae|adeI	Moraxellaceae|multidrug
sW1GLT1S1	GLT1S	GLTS	adeJ	multidrug	ADEJ	Moraxellaceae	Moraxellaceae|adeJ	Moraxellaceae|multidrug
sW1GLT1S1	GLT1S	GLTS	adeK	multidrug	ADEK	Moraxellaceae	Moraxellaceae|adeK	Moraxellaceae|multidrug
sW1GLT1S1	GLT1S	GLTS	ompR	multidrug	OMPR	Moraxellaceae	Moraxellaceae|ompR	Moraxellaceae|multidrug
sW1GLT1S1	GLT1S	GLTS	bpeF	multidrug	BPEF	Burkholderiaceae	Burkholderiaceae|bpeF	Burkholderiaceae|multidrug
sW1GLT1S1	GLT1S	GLTS	mexE	multidrug	MEXE	Burkholderiaceae	Burkholderiaceae|mexE	Burkholderiaceae|multidrug
sW1GLT1S1	GLT1S	GLTS	mexT	multidrug	MEXT	Pseudomonadaceae	Pseudomonadaceae|mexT	Pseudomonadaceae|multidrug
sW1GLT1S1	GLT1S	GLTS	mexE	multidrug	MEXE	Burkholderiaceae	Burkholderiaceae|mexE	Burkholderiaceae|multidrug
sW1GLT1S1	GLT1S	GLTS	rphB	rifamycin	RPHB	Paenibacillaceae	Paenibacillaceae|rphB	Paenibacillaceae|rifamycin
sW1GLT1S1	GLT1S	GLTS	mdtL	multidrug	MDTL	Moraxellaceae	Moraxellaceae|mdtL	Moraxellaceae|multidrug
sW1GLT1S1	GLT1S	GLTS	abeS	multidrug	ABES	Moraxellaceae	Moraxellaceae|abeS	Moraxellaceae|multidrug
sW1GLT1S1	GLT1S	GLTS	mexE	multidrug	MEXE	Moraxellaceae	Moraxellaceae|mexE	Moraxellaceae|multidrug
sW1GLT1S1	GLT1S	GLTS	adeF	multidrug	ADEF	Moraxellaceae	Moraxellaceae|adeF	Moraxellaceae|multidrug
sW1GLT1S1	GLT1S	GLTS	adeH	multidrug	ADEH	Moraxellaceae	Moraxellaceae|adeH	Moraxellaceae|multidrug
sW1GLT1S1	GLT1S	GLTS	ADC-18	beta-lactam	ADC-18	Moraxellaceae	Moraxellaceae|ADC-18	Moraxellaceae|beta-lactam
sW1GLT1S1	GLT1S	GLTS	carO	beta-lactam	CARO	Moraxellaceae	Moraxellaceae|carO	Moraxellaceae|beta-lactam
sW1GLT1S1	GLT1S	GLTS	mexB	multidrug	MEXB	Moraxellaceae	Moraxellaceae|mexB	Moraxellaceae|multidrug
sW1GLT1S1	GLT1S	GLTS	MexK	multidrug	MEXK	Pseudomonadaceae	Pseudomonadaceae|MexK	Pseudomonadaceae|multidrug
sW1GLT1S1	GLT1S	GLTS	bpeF	multidrug	BPEF	Burkholderiaceae	Burkholderiaceae|bpeF	Burkholderiaceae|multidrug
sW1GLT1S1	GLT1S	GLTS	mexE	multidrug	MEXE	Burkholderiaceae	Burkholderiaceae|mexE	Burkholderiaceae|multidrug
sW1GLT1S1	GLT1S	GLTS	rphB	rifamycin	RPHB	Paenibacillaceae	Paenibacillaceae|rphB	Paenibacillaceae|rifamycin
sW1GLT1S1	GLT1S	GLTS	major_facilitator_superfamily_transporter	multidrug	MFST	Moraxellaceae	Moraxellaceae|major_facilitator_superfamily_transporter	Moraxellaceae|multidrug
sW1GLT1S1	GLT1S	GLTS	mexF	multidrug	MEXF	Oxalobacteraceae	Oxalobacteraceae|mexF	Oxalobacteraceae|multidrug
sW1GLT1S1	GLT1S	GLTS	mdfA	multidrug	MDFA	Moraxellaceae	Moraxellaceae|mdfA	Moraxellaceae|multidrug
sW1GLT1S1	GLT1S	GLTS	oprM	multidrug	OPRM	Pseudomonadaceae	Pseudomonadaceae|oprM	Pseudomonadaceae|multidrug
sW1GLT1S1	GLT1S	GLTS	mexB	multidrug	MEXB	Pseudomonadaceae	Pseudomonadaceae|mexB	Pseudomonadaceae|multidrug
sW1GLT1S1	GLT1S	GLTS	mexA	multidrug	MEXA	Pseudomonadaceae	Pseudomonadaceae|mexA	Pseudomonadaceae|multidrug
sW1GLT1S1	GLT1S	GLTS	lsa	MLS	LSA	Paenibacillaceae	Paenibacillaceae|lsa	Paenibacillaceae|MLS
sW1GLT1S1	GLT1S	GLTS	multidrug_ABC_transporter	multidrug	ABC TRANSPORTER	Moraxellaceae	Moraxellaceae|multidrug_ABC_transporter	Moraxellaceae|multidrug
sW1GLT1S1	GLT1S	GLTS	mexW	multidrug	MEXW	Pseudomonadaceae	Pseudomonadaceae|mexW	Pseudomonadaceae|multidrug
sW1GLT1S1	GLT1S	GLTS	bacA	bacitracin	BACA	Comamonadaceae	Comamonadaceae|bacA	Comamonadaceae|bacitracin
sW1GLT1S1	GLT1S	GLTS	adeJ	multidrug	ADEJ	Moraxellaceae	Moraxellaceae|adeJ	Moraxellaceae|multidrug
sW1GLT1S1	GLT1S	GLTS	bacA	bacitracin	BACA	Comamonadaceae	Comamonadaceae|bacA	Comamonadaceae|bacitracin
sW1GLT1S1	GLT1S	GLTS	acrB	multidrug	ACRB	Alcaligenaceae	Alcaligenaceae|acrB	Alcaligenaceae|multidrug
sW1GLT1S1	GLT1S	GLTS	mdtB	multidrug	MDTB	Oxalobacteraceae	Oxalobacteraceae|mdtB	Oxalobacteraceae|multidrug
sW1GLT1S1	GLT1S	GLTS	rphB	rifamycin	RPHB	Chitinophagaceae	Chitinophagaceae|rphB	Chitinophagaceae|rifamycin
sW1GLT1S1	GLT1S	GLTS	arnA	peptide	ARNA	Pseudomonadaceae	Pseudomonadaceae|arnA	Pseudomonadaceae|peptide
sW1GLT1S1	GLT1S	GLTS	smeB	multidrug	SMEB	Phyllobacteriaceae	Phyllobacteriaceae|smeB	Phyllobacteriaceae|multidrug
sW1GLT1S1	GLT1S	GLTS	mexF	multidrug	MEXF	Pseudomonadaceae	Pseudomonadaceae|mexF	Pseudomonadaceae|multidrug
sW1GLT1S1	GLT1S	GLTS	MuxC	multidrug	MUXC	Pseudomonadaceae	Pseudomonadaceae|MuxC	Pseudomonadaceae|multidrug
sW1GLT1S1	GLT1S	GLTS	MuxB	multidrug	MUXB	Pseudomonadaceae	Pseudomonadaceae|MuxB	Pseudomonadaceae|multidrug
sW1GLT1S1	GLT1S	GLTS	ADC-19	beta-lactam	ADC-19	Moraxellaceae	Moraxellaceae|ADC-19	Moraxellaceae|beta-lactam
sW1GLT1S1	GLT1S	GLTS	metallo-beta-lactamase	beta-lactam	METALLO-BETA-LACTAMASE	Caulobacteraceae	Caulobacteraceae|metallo-beta-lactamase	Caulobacteraceae|beta-lactam
sW1GLT1S1	GLT1S	GLTS	mexT	multidrug	MEXT	Pseudomonadaceae	Pseudomonadaceae|mexT	Pseudomonadaceae|multidrug
sW1GLT1S1	GLT1S	GLTS	bacA	bacitracin	BACA	Pseudomonadaceae	Pseudomonadaceae|bacA	Pseudomonadaceae|bacitracin
sW1GLT1S1	GLT1S	GLTS	MexK	multidrug	MEXK	Pseudomonadaceae	Pseudomonadaceae|MexK	Pseudomonadaceae|multidrug
sW1GLT1S1	GLT1S	GLTS	adeK	multidrug	ADEK	Moraxellaceae	Moraxellaceae|adeK	Moraxellaceae|multidrug
sW1GLT1S1	GLT1S	GLTS	adeJ	multidrug	ADEJ	Moraxellaceae	Moraxellaceae|adeJ	Moraxellaceae|multidrug
sW1GLT1S1	GLT1S	GLTS	acrB	multidrug	ACRB	Alcaligenaceae	Alcaligenaceae|acrB	Alcaligenaceae|multidrug
sW1GLT1S1	GLT1S	GLTS	oprC	multidrug	OPRC	Burkholderiaceae	Burkholderiaceae|oprC	Burkholderiaceae|multidrug
sW1GLT1S1	GLT1S	GLTS	mexX	multidrug	MEXX	Burkholderiaceae	Burkholderiaceae|mexX	Burkholderiaceae|multidrug
sW1GLT1S1	GLT1S	GLTS	amrB	multidrug	AMRB	Burkholderiaceae	Burkholderiaceae|amrB	Burkholderiaceae|multidrug
sW1GLT1S1	GLT1S	GLTS	bacA	bacitracin	BACA	Paenibacillaceae	Paenibacillaceae|bacA	Paenibacillaceae|bacitracin
sW1GLT1S1	GLT1S	GLTS	adeF	multidrug	ADEF	Comamonadaceae	Comamonadaceae|adeF	Comamonadaceae|multidrug
sW1GLT1S1	GLT1S	GLTS	OpmH	triclosan	OPMH	Pseudomonadaceae	Pseudomonadaceae|OpmH	Pseudomonadaceae|triclosan
sW1GLT1S1	GLT1S	GLTS	adeJ	multidrug	ADEJ	Moraxellaceae	Moraxellaceae|adeJ	Moraxellaceae|multidrug
sW1GLT1S1	GLT1S	GLTS	mexW	multidrug	MEXW	Pseudomonadaceae	Pseudomonadaceae|mexW	Pseudomonadaceae|multidrug
sW1GLT1S1	GLT1S	GLTS	abeM	multidrug	ABEM	Moraxellaceae	Moraxellaceae|abeM	Moraxellaceae|multidrug
sW1GLT1S1	GLT1S	GLTS	oprM	multidrug	OPRM	Moraxellaceae	Moraxellaceae|oprM	Moraxellaceae|multidrug
sW1GLT1S1	GLT1S	GLTS	macA	MLS	MACA	Moraxellaceae	Moraxellaceae|macA	Moraxellaceae|MLS
sW1GLT1S1	GLT1S	GLTS	bpeF	multidrug	BPEF	Burkholderiaceae	Burkholderiaceae|bpeF	Burkholderiaceae|multidrug
sW1GLT1S1	GLT1S	GLTS	AxyY	multidrug	AXYY	Oxalobacteraceae	Oxalobacteraceae|AxyY	Oxalobacteraceae|multidrug
sW1GLT1S1	GLT1S	GLTS	oprM	multidrug	OPRM	Moraxellaceae	Moraxellaceae|oprM	Moraxellaceae|multidrug
sW1GLT1S1	GLT1S	GLTS	adeB	multidrug	ADEB	Moraxellaceae	Moraxellaceae|adeB	Moraxellaceae|multidrug
sW1GLT1S1	GLT1S	GLTS	TriC	triclosan	TRIC	Pseudomonadaceae	Pseudomonadaceae|TriC	Pseudomonadaceae|triclosan
sW1GLT1S1	GLT1S	GLTS	ceoB	multidrug	CEOB	Burkholderiaceae	Burkholderiaceae|ceoB	Burkholderiaceae|multidrug
sW1GLT1S1	GLT1S	GLTS	bpeF	multidrug	BPEF	Burkholderiaceae	Burkholderiaceae|bpeF	Burkholderiaceae|multidrug
sW1GLT1S1	GLT1S	GLTS	ceoB	multidrug	CEOB	Burkholderiaceae	Burkholderiaceae|ceoB	Burkholderiaceae|multidrug
sW1GLT1S1	GLT1S	GLTS	bacA	bacitracin	BACA	Alcaligenaceae	Alcaligenaceae|bacA	Alcaligenaceae|bacitracin
sW1GLT1S1	GLT1S	GLTS	MuxB	multidrug	MUXB	Burkholderiaceae	Burkholderiaceae|MuxB	Burkholderiaceae|multidrug
sW1GLT1S1	GLT1S	GLTS	mexF	multidrug	MEXF	Pseudomonadaceae	Pseudomonadaceae|mexF	Pseudomonadaceae|multidrug
sW1GLT1S1	GLT1S	GLTS	bpeF	multidrug	BPEF	Burkholderiaceae	Burkholderiaceae|bpeF	Burkholderiaceae|multidrug
sW1GLT1S1	GLT1S	GLTS	bpeF	multidrug	BPEF	Burkholderiaceae	Burkholderiaceae|bpeF	Burkholderiaceae|multidrug
sW1GLT1S1	GLT1S	GLTS	ceoB	multidrug	CEOB	Burkholderiaceae	Burkholderiaceae|ceoB	Burkholderiaceae|multidrug
sW1GLT1S1	GLT1S	GLTS	mexE	multidrug	MEXE	Burkholderiaceae	Burkholderiaceae|mexE	Burkholderiaceae|multidrug
sW1GLT1S1	GLT1S	GLTS	fosB	fosfomycin	FOSB	Paenibacillaceae	Paenibacillaceae|fosB	Paenibacillaceae|fosfomycin
sW1GLT1S1	GLT1S	GLTS	rphB	rifamycin	RPHB	Unclassified	Unclassified|rphB	Unclassified|rifamycin
sW1GLT1S1	GLT1S	GLTS	rphB	rifamycin	RPHB	Bacillaceae	Bacillaceae|rphB	Bacillaceae|rifamycin
sW1GLT1S1	GLT1S	GLTS	mexT	multidrug	MEXT	Moraxellaceae	Moraxellaceae|mexT	Moraxellaceae|multidrug
sW1GLT1S1	GLT1S	GLTS	lsa	MLS	LSA	Paenibacillaceae	Paenibacillaceae|lsa	Paenibacillaceae|MLS
sW1GLT1S1	GLT1S	GLTS	oprC	multidrug	OPRC	Burkholderiaceae	Burkholderiaceae|oprC	Burkholderiaceae|multidrug
sW1GLT1S1	GLT1S	GLTS	adeB	multidrug	ADEB	Moraxellaceae	Moraxellaceae|adeB	Moraxellaceae|multidrug
sW1GLT1S1	GLT1S	GLTS	bpeF	multidrug	BPEF	Burkholderiaceae	Burkholderiaceae|bpeF	Burkholderiaceae|multidrug
sW1GLT1S1	GLT1S	GLTS	tetA(48)	tetracycline	TETA(48)	Paenibacillaceae	Paenibacillaceae|tetA(48)	Paenibacillaceae|tetracycline
sW1GLT1S1	GLT1S	GLTS	MuxB	multidrug	MUXB	Pseudomonadaceae	Pseudomonadaceae|MuxB	Pseudomonadaceae|multidrug
sW1GLT1S1	GLT1S	GLTS	adeB	multidrug	ADEB	Moraxellaceae	Moraxellaceae|adeB	Moraxellaceae|multidrug
sW1GLT1S1	GLT1S	GLTS	adeB	multidrug	ADEB	Moraxellaceae	Moraxellaceae|adeB	Moraxellaceae|multidrug
sW1GLT1S1	GLT1S	GLTS	vanX	glycopeptide	VANX	Paenibacillaceae	Paenibacillaceae|vanX	Paenibacillaceae|glycopeptide
sW1GLT1S1	GLT1S	GLTS	mexE	multidrug	MEXE	Burkholderiaceae	Burkholderiaceae|mexE	Burkholderiaceae|multidrug
sW1GLT1S1	GLT1S	GLTS	mexW	multidrug	MEXW	Pseudomonadaceae	Pseudomonadaceae|mexW	Pseudomonadaceae|multidrug
sW1GLT1S1	GLT1S	GLTS	MuxB	multidrug	MUXB	Alcaligenaceae	Alcaligenaceae|MuxB	Alcaligenaceae|multidrug
sW1GLT1S1	GLT1S	GLTS	adeF	multidrug	ADEF	Unclassified	Unclassified|adeF	Unclassified|multidrug
sW1GLT1S1	GLT1S	GLTS	tetB(48)	tetracycline	TETB(48)	Paenibacillaceae	Paenibacillaceae|tetB(48)	Paenibacillaceae|tetracycline
sW1GLT1S1	GLT1S	GLTS	adeJ	multidrug	ADEJ	Moraxellaceae	Moraxellaceae|adeJ	Moraxellaceae|multidrug
sW1GLT1S1	GLT1S	GLTS	mexF	multidrug	MEXF	Rhodanobacteraceae	Rhodanobacteraceae|mexF	Rhodanobacteraceae|multidrug
sW1GLT1S1	GLT1S	GLTS	multidrug_ABC_transporter	multidrug	ABC TRANSPORTER	Oxalobacteraceae	Oxalobacteraceae|multidrug_ABC_transporter	Oxalobacteraceae|multidrug
sW1GLT1S1	GLT1S	GLTS	lsa	MLS	LSA	Paenibacillaceae	Paenibacillaceae|lsa	Paenibacillaceae|MLS
sW1GLT1S1	GLT1S	GLTS	bacA	bacitracin	BACA	Burkholderiaceae	Burkholderiaceae|bacA	Burkholderiaceae|bacitracin
sW1GLT1S1	GLT1S	GLTS	acrB	multidrug	ACRB	Alcaligenaceae	Alcaligenaceae|acrB	Alcaligenaceae|multidrug
sW1GLT1S1	GLT1S	GLTS	TriC	triclosan	TRIC	Pseudomonadaceae	Pseudomonadaceae|TriC	Pseudomonadaceae|triclosan
sW1GLT1S1	GLT1S	GLTS	ceoB	multidrug	CEOB	Burkholderiaceae	Burkholderiaceae|ceoB	Burkholderiaceae|multidrug
sW1GLT1S1	GLT1S	GLTS	mexW	multidrug	MEXW	Pseudomonadaceae	Pseudomonadaceae|mexW	Pseudomonadaceae|multidrug
sW1GLT1S1	GLT1S	GLTS	rpoB2	multidrug	RPOB2	Sphingomonadaceae	Sphingomonadaceae|rpoB2	Sphingomonadaceae|multidrug
sW1GLT1S1	GLT1S	GLTS	TriC	triclosan	TRIC	Pseudomonadaceae	Pseudomonadaceae|TriC	Pseudomonadaceae|triclosan
sW1GLT1S1	GLT1S	GLTS	mexF	multidrug	MEXF	Rhodanobacteraceae	Rhodanobacteraceae|mexF	Rhodanobacteraceae|multidrug
sW1GLT1S1	GLT1S	GLTS	adeA	multidrug	ADEA	Moraxellaceae	Moraxellaceae|adeA	Moraxellaceae|multidrug
sW1GLT1S1	GLT1S	GLTS	bacA	bacitracin	BACA	Burkholderiaceae	Burkholderiaceae|bacA	Burkholderiaceae|bacitracin
sW1GLT1S2	GLT1S	GLTS	tetB(48)	tetracycline	TETB(48)	Mycobacteriaceae	Mycobacteriaceae|tetB(48)	Mycobacteriaceae|tetracycline
sW1GLT1S2	GLT1S	GLTS	tetA(48)	tetracycline	TETA(48)	Mycobacteriaceae	Mycobacteriaceae|tetA(48)	Mycobacteriaceae|tetracycline
sW1GLT1S2	GLT1S	GLTS	multidrug_ABC_transporter	multidrug	ABC TRANSPORTER	Burkholderiaceae	Burkholderiaceae|multidrug_ABC_transporter	Burkholderiaceae|multidrug
sW1GLT1S2	GLT1S	GLTS	bacA	bacitracin	BACA	Burkholderiaceae	Burkholderiaceae|bacA	Burkholderiaceae|bacitracin
sW1GLT1S2	GLT1S	GLTS	rphB	rifamycin	RPHB	Paenibacillaceae	Paenibacillaceae|rphB	Paenibacillaceae|rifamycin
sW1GLT1S2	GLT1S	GLTS	MexK	multidrug	MEXK	Pseudomonadaceae	Pseudomonadaceae|MexK	Pseudomonadaceae|multidrug
sW1GLT1S2	GLT1S	GLTS	rosA	fosmidomycin	ROSA	Burkholderiaceae	Burkholderiaceae|rosA	Burkholderiaceae|fosmidomycin
sW1GLT1S2	GLT1S	GLTS	cat_chloramphenicol_acetyltransferase	phenicol	CAT	Paenibacillaceae	Paenibacillaceae|cat_chloramphenicol_acetyltransferase	Paenibacillaceae|phenicol
sW1GLT1S2	GLT1S	GLTS	multidrug_ABC_transporter	multidrug	ABC TRANSPORTER	Moraxellaceae	Moraxellaceae|multidrug_ABC_transporter	Moraxellaceae|multidrug
sW1GLT1S2	GLT1S	GLTS	adeH	multidrug	ADEH	Moraxellaceae	Moraxellaceae|adeH	Moraxellaceae|multidrug
sW1GLT1S2	GLT1S	GLTS	mdtN	multidrug	MDTN	Burkholderiaceae	Burkholderiaceae|mdtN	Burkholderiaceae|multidrug
sW1GLT1S2	GLT1S	GLTS	bpeF	multidrug	BPEF	Burkholderiaceae	Burkholderiaceae|bpeF	Burkholderiaceae|multidrug
sW1GLT1S2	GLT1S	GLTS	acrB	multidrug	ACRB	Alcaligenaceae	Alcaligenaceae|acrB	Alcaligenaceae|multidrug
sW1GLT1S2	GLT1S	GLTS	bacA	bacitracin	BACA	Alcaligenaceae	Alcaligenaceae|bacA	Alcaligenaceae|bacitracin
sW1GLT1S2	GLT1S	GLTS	mdtL	multidrug	MDTL	Moraxellaceae	Moraxellaceae|mdtL	Moraxellaceae|multidrug
sW1GLT1S2	GLT1S	GLTS	bpeF	multidrug	BPEF	Burkholderiaceae	Burkholderiaceae|bpeF	Burkholderiaceae|multidrug
sW1GLT1S2	GLT1S	GLTS	MuxB	multidrug	MUXB	Pseudomonadaceae	Pseudomonadaceae|MuxB	Pseudomonadaceae|multidrug
sW1GLT1S2	GLT1S	GLTS	MuxC	multidrug	MUXC	Pseudomonadaceae	Pseudomonadaceae|MuxC	Pseudomonadaceae|multidrug
sW1GLT1S2	GLT1S	GLTS	OpmH	triclosan	OPMH	Pseudomonadaceae	Pseudomonadaceae|OpmH	Pseudomonadaceae|triclosan
sW1GLT1S2	GLT1S	GLTS	bacA	bacitracin	BACA	Burkholderiaceae	Burkholderiaceae|bacA	Burkholderiaceae|bacitracin
sW1GLT1S2	GLT1S	GLTS	bacA	bacitracin	BACA	Burkholderiaceae	Burkholderiaceae|bacA	Burkholderiaceae|bacitracin
sW1GLT1S2	GLT1S	GLTS	OpmH	triclosan	OPMH	Pseudomonadaceae	Pseudomonadaceae|OpmH	Pseudomonadaceae|triclosan
sW1GLT1S2	GLT1S	GLTS	ceoB	multidrug	CEOB	Alcaligenaceae	Alcaligenaceae|ceoB	Alcaligenaceae|multidrug
sW1GLT1S2	GLT1S	GLTS	bacA	bacitracin	BACA	Burkholderiaceae	Burkholderiaceae|bacA	Burkholderiaceae|bacitracin
sW1GLT1S2	GLT1S	GLTS	arnA	peptide	ARNA	Pseudomonadaceae	Pseudomonadaceae|arnA	Pseudomonadaceae|peptide
sW1GLT1S2	GLT1S	GLTS	bacA	bacitracin	BACA	Pseudomonadaceae	Pseudomonadaceae|bacA	Pseudomonadaceae|bacitracin
sW1GLT1S2	GLT1S	GLTS	mdfA	multidrug	MDFA	Moraxellaceae	Moraxellaceae|mdfA	Moraxellaceae|multidrug
sW1GLT1S2	GLT1S	GLTS	ceoB	multidrug	CEOB	Burkholderiaceae	Burkholderiaceae|ceoB	Burkholderiaceae|multidrug
sW1GLT1S2	GLT1S	GLTS	rphB	rifamycin	RPHB	Paenibacillaceae	Paenibacillaceae|rphB	Paenibacillaceae|rifamycin
sW1GLT1S2	GLT1S	GLTS	acrB	multidrug	ACRB	Alcaligenaceae	Alcaligenaceae|acrB	Alcaligenaceae|multidrug
sW1GLT1S2	GLT1S	GLTS	mexE	multidrug	MEXE	Moraxellaceae	Moraxellaceae|mexE	Moraxellaceae|multidrug
sW1GLT1S2	GLT1S	GLTS	adeF	multidrug	ADEF	Moraxellaceae	Moraxellaceae|adeF	Moraxellaceae|multidrug
sW1GLT1S2	GLT1S	GLTS	adeH	multidrug	ADEH	Moraxellaceae	Moraxellaceae|adeH	Moraxellaceae|multidrug
sW1GLT1S2	GLT1S	GLTS	ADC-22	beta-lactam	ADC-22	Moraxellaceae	Moraxellaceae|ADC-22	Moraxellaceae|beta-lactam
sW1GLT1S2	GLT1S	GLTS	ceoB	multidrug	CEOB	Burkholderiaceae	Burkholderiaceae|ceoB	Burkholderiaceae|multidrug
sW1GLT1S2	GLT1S	GLTS	amrB	multidrug	AMRB	Burkholderiaceae	Burkholderiaceae|amrB	Burkholderiaceae|multidrug
sW1GLT1S2	GLT1S	GLTS	mexX	multidrug	MEXX	Burkholderiaceae	Burkholderiaceae|mexX	Burkholderiaceae|multidrug
sW1GLT1S2	GLT1S	GLTS	abeM	multidrug	ABEM	Moraxellaceae	Moraxellaceae|abeM	Moraxellaceae|multidrug
sW1GLT1S2	GLT1S	GLTS	OXA-421	beta-lactam	OXA	Moraxellaceae	Moraxellaceae|OXA	Moraxellaceae|beta-lactam
sW1GLT1S2	GLT1S	GLTS	adeI	multidrug	ADEI	Moraxellaceae	Moraxellaceae|adeI	Moraxellaceae|multidrug
sW1GLT1S2	GLT1S	GLTS	adeJ	multidrug	ADEJ	Moraxellaceae	Moraxellaceae|adeJ	Moraxellaceae|multidrug
sW1GLT1S2	GLT1S	GLTS	adeK	multidrug	ADEK	Moraxellaceae	Moraxellaceae|adeK	Moraxellaceae|multidrug
sW1GLT1S2	GLT1S	GLTS	multidrug_ABC_transporter	multidrug	ABC TRANSPORTER	Alcaligenaceae	Alcaligenaceae|multidrug_ABC_transporter	Alcaligenaceae|multidrug
sW1GLT1S2	GLT1S	GLTS	bacA	bacitracin	BACA	Burkholderiaceae	Burkholderiaceae|bacA	Burkholderiaceae|bacitracin
sW1GLT1S2	GLT1S	GLTS	tetR	tetracycline	TETR	Moraxellaceae	Moraxellaceae|tetR	Moraxellaceae|tetracycline
sW1GLT1S2	GLT1S	GLTS	adeC	multidrug	ADEC	Moraxellaceae	Moraxellaceae|adeC	Moraxellaceae|multidrug
sW1GLT1S2	GLT1S	GLTS	mexE	multidrug	MEXE	Burkholderiaceae	Burkholderiaceae|mexE	Burkholderiaceae|multidrug
sW1GLT1S2	GLT1S	GLTS	multidrug_ABC_transporter	multidrug	ABC TRANSPORTER	Burkholderiaceae	Burkholderiaceae|multidrug_ABC_transporter	Burkholderiaceae|multidrug
sW1GLT1S2	GLT1S	GLTS	mexB	multidrug	MEXB	Moraxellaceae	Moraxellaceae|mexB	Moraxellaceae|multidrug
sW1GLT1S2	GLT1S	GLTS	ceoB	multidrug	CEOB	Burkholderiaceae	Burkholderiaceae|ceoB	Burkholderiaceae|multidrug
sW1GLT1S2	GLT1S	GLTS	adeF	multidrug	ADEF	Burkholderiaceae	Burkholderiaceae|adeF	Burkholderiaceae|multidrug
sW1GLT1S2	GLT1S	GLTS	bacA	bacitracin	BACA	Paenibacillaceae	Paenibacillaceae|bacA	Paenibacillaceae|bacitracin
sW1GLT1S2	GLT1S	GLTS	ceoB	multidrug	CEOB	Rhizobiaceae	Rhizobiaceae|ceoB	Rhizobiaceae|multidrug
sW1GLT1S2	GLT1S	GLTS	adeC	multidrug	ADEC	Moraxellaceae	Moraxellaceae|adeC	Moraxellaceae|multidrug
sW1GLT1S2	GLT1S	GLTS	adeB	multidrug	ADEB	Moraxellaceae	Moraxellaceae|adeB	Moraxellaceae|multidrug
sW1GLT1S2	GLT1S	GLTS	AxyY	multidrug	AXYY	Burkholderiaceae	Burkholderiaceae|AxyY	Burkholderiaceae|multidrug
sW1GLT1S2	GLT1S	GLTS	mexE	multidrug	MEXE	Burkholderiaceae	Burkholderiaceae|mexE	Burkholderiaceae|multidrug
sW1GLT1S2	GLT1S	GLTS	multidrug_ABC_transporter	multidrug	ABC TRANSPORTER	Alcaligenaceae	Alcaligenaceae|multidrug_ABC_transporter	Alcaligenaceae|multidrug
sW1GLT1S2	GLT1S	GLTS	tet43	tetracycline	TET43	Microbacteriaceae	Microbacteriaceae|tet43	Microbacteriaceae|tetracycline
sW1GLT1S2	GLT1S	GLTS	oprM	multidrug	OPRM	Pseudomonadaceae	Pseudomonadaceae|oprM	Pseudomonadaceae|multidrug
sW1GLT1S2	GLT1S	GLTS	ceoB	multidrug	CEOB	Burkholderiaceae	Burkholderiaceae|ceoB	Burkholderiaceae|multidrug
sW1GLT1S2	GLT1S	GLTS	ceoB	multidrug	CEOB	Burkholderiaceae	Burkholderiaceae|ceoB	Burkholderiaceae|multidrug
sW1GLT1S2	GLT1S	GLTS	tetB(48)	tetracycline	TETB(48)	Paenibacillaceae	Paenibacillaceae|tetB(48)	Paenibacillaceae|tetracycline
sW1GLT1S2	GLT1S	GLTS	tetB(48)	tetracycline	TETB(48)	Microbacteriaceae	Microbacteriaceae|tetB(48)	Microbacteriaceae|tetracycline
sW1GLT1S2	GLT1S	GLTS	rosA	fosmidomycin	ROSA	Burkholderiaceae	Burkholderiaceae|rosA	Burkholderiaceae|fosmidomycin
sW1GLT1S2	GLT1S	GLTS	MexK	multidrug	MEXK	Pseudomonadaceae	Pseudomonadaceae|MexK	Pseudomonadaceae|multidrug
sW1GLT1S2	GLT1S	GLTS	mexB	multidrug	MEXB	Pectobacteriaceae	Pectobacteriaceae|mexB	Pectobacteriaceae|multidrug
sW1GLT1S2	GLT1S	GLTS	bpeF	multidrug	BPEF	Burkholderiaceae	Burkholderiaceae|bpeF	Burkholderiaceae|multidrug
sW1GLT1S2	GLT1S	GLTS	mexE	multidrug	MEXE	Burkholderiaceae	Burkholderiaceae|mexE	Burkholderiaceae|multidrug
sW1GLT1S2	GLT1S	GLTS	mdtK	multidrug	MDTK	Moraxellaceae	Moraxellaceae|mdtK	Moraxellaceae|multidrug
sW1GLT1S2	GLT1S	GLTS	tetB(48)	tetracycline	TETB(48)	Microbacteriaceae	Microbacteriaceae|tetB(48)	Microbacteriaceae|tetracycline
sW1GLT1S2	GLT1S	GLTS	bpeF	multidrug	BPEF	Alcaligenaceae	Alcaligenaceae|bpeF	Alcaligenaceae|multidrug
sW1GLT1S2	GLT1S	GLTS	tetA(48)	tetracycline	TETA(48)	Paenibacillaceae	Paenibacillaceae|tetA(48)	Paenibacillaceae|tetracycline
sW1GLT1S2	GLT1S	GLTS	rphB	rifamycin	RPHB	Paenibacillaceae	Paenibacillaceae|rphB	Paenibacillaceae|rifamycin
sW1GLT1S2	GLT1S	GLTS	mexA	multidrug	MEXA	Pseudomonadaceae	Pseudomonadaceae|mexA	Pseudomonadaceae|multidrug
sW1GLT1S2	GLT1S	GLTS	mexB	multidrug	MEXB	Pseudomonadaceae	Pseudomonadaceae|mexB	Pseudomonadaceae|multidrug
sW1GLT1S2	GLT1S	GLTS	bacA	bacitracin	BACA	Unclassified	Unclassified|bacA	Unclassified|bacitracin
sW1GLT1S2	GLT1S	GLTS	LlmA_23S_ribosomal_RNA_methyltransferase	MLS	LLMA	Paenibacillaceae	Paenibacillaceae|LlmA_23S_ribosomal_RNA_methyltransferase	Paenibacillaceae|MLS
sW1GLT1S2	GLT1S	GLTS	ANT(3'')-IIa	aminoglycoside	ANT(3'')-IIA	Moraxellaceae	Moraxellaceae|ANT(3'')-IIa	Moraxellaceae|aminoglycoside
sW1GLT1S2	GLT1S	GLTS	mdtK	multidrug	MDTK	Moraxellaceae	Moraxellaceae|mdtK	Moraxellaceae|multidrug
sW1GLT1S2	GLT1S	GLTS	emrB	multidrug	EMRB	Moraxellaceae	Moraxellaceae|emrB	Moraxellaceae|multidrug
sW1GLT1S2	GLT1S	GLTS	lsa	MLS	LSA	Paenibacillaceae	Paenibacillaceae|lsa	Paenibacillaceae|MLS
sW1GLT1S2	GLT1S	GLTS	bpeF	multidrug	BPEF	Burkholderiaceae	Burkholderiaceae|bpeF	Burkholderiaceae|multidrug
sW1GLT1S2	GLT1S	GLTS	adeF	multidrug	ADEF	Alcaligenaceae	Alcaligenaceae|adeF	Alcaligenaceae|multidrug
sW1GLT1S2	GLT1S	GLTS	mdtB	multidrug	MDTB	Burkholderiaceae	Burkholderiaceae|mdtB	Burkholderiaceae|multidrug
sW1GLT1S2	GLT1S	GLTS	LlmA_23S_ribosomal_RNA_methyltransferase	MLS	LLMA	Paenibacillaceae	Paenibacillaceae|LlmA_23S_ribosomal_RNA_methyltransferase	Paenibacillaceae|MLS
sW1GLT1S2	GLT1S	GLTS	mexT	multidrug	MEXT	Pseudomonadaceae	Pseudomonadaceae|mexT	Pseudomonadaceae|multidrug
sW1GLT1S2	GLT1S	GLTS	rphB	rifamycin	RPHB	Bacillaceae	Bacillaceae|rphB	Bacillaceae|rifamycin
sW1GLT1S2	GLT1S	GLTS	bpeF	multidrug	BPEF	Burkholderiaceae	Burkholderiaceae|bpeF	Burkholderiaceae|multidrug
sW1GLT1S2	GLT1S	GLTS	adeR	multidrug	ADER	Moraxellaceae	Moraxellaceae|adeR	Moraxellaceae|multidrug
sW1GLT1S2	GLT1S	GLTS	ceoB	multidrug	CEOB	Burkholderiaceae	Burkholderiaceae|ceoB	Burkholderiaceae|multidrug
sW1GLT1S2	GLT1S	GLTS	bacA	bacitracin	BACA	Comamonadaceae	Comamonadaceae|bacA	Comamonadaceae|bacitracin
sW1GLT1S2	GLT1S	GLTS	bacA	bacitracin	BACA	Burkholderiaceae	Burkholderiaceae|bacA	Burkholderiaceae|bacitracin
sW1GLT1S2	GLT1S	GLTS	bpeF	multidrug	BPEF	Burkholderiaceae	Burkholderiaceae|bpeF	Burkholderiaceae|multidrug
sW1GLT1S2	GLT1S	GLTS	sul1	sulfonamide	SUL1	Sphingomonadaceae	Sphingomonadaceae|sul1	Sphingomonadaceae|sulfonamide
sW1GLT1S2	GLT1S	GLTS	bacA	bacitracin	BACA	Burkholderiaceae	Burkholderiaceae|bacA	Burkholderiaceae|bacitracin
sW1GLT1S2	GLT1S	GLTS	bacA	bacitracin	BACA	Oxalobacteraceae	Oxalobacteraceae|bacA	Oxalobacteraceae|bacitracin
sW1GLT1S2	GLT1S	GLTS	bacA	bacitracin	BACA	Oxalobacteraceae	Oxalobacteraceae|bacA	Oxalobacteraceae|bacitracin
sW1GLT1S2	GLT1S	GLTS	bpeF	multidrug	BPEF	Burkholderiaceae	Burkholderiaceae|bpeF	Burkholderiaceae|multidrug
sW1GLT1S2	GLT1S	GLTS	OXA-421	beta-lactam	OXA	Moraxellaceae	Moraxellaceae|OXA	Moraxellaceae|beta-lactam
sW1GLT1S2	GLT1S	GLTS	mexN	multidrug	MEXN	Pseudomonadaceae	Pseudomonadaceae|mexN	Pseudomonadaceae|multidrug
sW1GLT1S2	GLT1S	GLTS	mexB	multidrug	MEXB	Burkholderiaceae	Burkholderiaceae|mexB	Burkholderiaceae|multidrug
sW1GLT1S2	GLT1S	GLTS	bacA	bacitracin	BACA	Alcaligenaceae	Alcaligenaceae|bacA	Alcaligenaceae|bacitracin
sW1GLT1S2	GLT1S	GLTS	opcM	multidrug	OPCM	Burkholderiaceae	Burkholderiaceae|opcM	Burkholderiaceae|multidrug
sW1GLT1S2	GLT1S	GLTS	ceoB	multidrug	CEOB	Burkholderiaceae	Burkholderiaceae|ceoB	Burkholderiaceae|multidrug
sW1GLT1S2	GLT1S	GLTS	mexE	multidrug	MEXE	Burkholderiaceae	Burkholderiaceae|mexE	Burkholderiaceae|multidrug
sW1GLT1S2	GLT1S	GLTS	tetB(48)	tetracycline	TETB(48)	Paenibacillaceae	Paenibacillaceae|tetB(48)	Paenibacillaceae|tetracycline
sW1GLT1S2	GLT1S	GLTS	oprM	multidrug	OPRM	Moraxellaceae	Moraxellaceae|oprM	Moraxellaceae|multidrug
sW1GLT1S2	GLT1S	GLTS	ompR	multidrug	OMPR	Moraxellaceae	Moraxellaceae|ompR	Moraxellaceae|multidrug
sW1GLT1S2	GLT1S	GLTS	MvaT	multidrug	MVAT	Pseudomonadaceae	Pseudomonadaceae|MvaT	Pseudomonadaceae|multidrug
sW1GLT1S2	GLT1S	GLTS	MvaT	multidrug	MVAT	Pseudomonadaceae	Pseudomonadaceae|MvaT	Pseudomonadaceae|multidrug
sW1GLT1S2	GLT1S	GLTS	mexE	multidrug	MEXE	Pseudomonadaceae	Pseudomonadaceae|mexE	Pseudomonadaceae|multidrug
sW1GLT1S2	GLT1S	GLTS	mexF	multidrug	MEXF	Pseudomonadaceae	Pseudomonadaceae|mexF	Pseudomonadaceae|multidrug
sW1GLT1S2	GLT1S	GLTS	bpeF	multidrug	BPEF	Burkholderiaceae	Burkholderiaceae|bpeF	Burkholderiaceae|multidrug
sW1GLT1S2	GLT1S	GLTS	bacA	bacitracin	BACA	Pseudomonadaceae	Pseudomonadaceae|bacA	Pseudomonadaceae|bacitracin
sW1GLT1S2	GLT1S	GLTS	TolC	multidrug	TOLC	Moraxellaceae	Moraxellaceae|TolC	Moraxellaceae|multidrug
sW1GLT1S2	GLT1S	GLTS	tetA(48)	tetracycline	TETA(48)	Paenibacillaceae	Paenibacillaceae|tetA(48)	Paenibacillaceae|tetracycline
sW1GLT1S2	GLT1S	GLTS	rphB	rifamycin	RPHB	Bacillaceae	Bacillaceae|rphB	Bacillaceae|rifamycin
sW1GLT1S2	GLT1S	GLTS	tetB(48)	tetracycline	TETB(48)	Microbacteriaceae	Microbacteriaceae|tetB(48)	Microbacteriaceae|tetracycline
sW1GLT1S2	GLT1S	GLTS	bacA	bacitracin	BACA	Burkholderiaceae	Burkholderiaceae|bacA	Burkholderiaceae|bacitracin
sW1GLT1S2	GLT1S	GLTS	rphB	rifamycin	RPHB	Bacillaceae	Bacillaceae|rphB	Bacillaceae|rifamycin
sW1GLT1S2	GLT1S	GLTS	ceoB	multidrug	CEOB	Burkholderiaceae	Burkholderiaceae|ceoB	Burkholderiaceae|multidrug
sW1GLT1S2	GLT1S	GLTS	lsa	MLS	LSA	Paenibacillaceae	Paenibacillaceae|lsa	Paenibacillaceae|MLS
sW1GLT1S2	GLT1S	GLTS	bacA	bacitracin	BACA	Boseaceae	Boseaceae|bacA	Boseaceae|bacitracin
sW1GLT1S2	GLT1S	GLTS	ceoB	multidrug	CEOB	Burkholderiaceae	Burkholderiaceae|ceoB	Burkholderiaceae|multidrug
sW1GLT1S2	GLT1S	GLTS	aph(3')-I	aminoglycoside	APH(3')-I	Moraxellaceae	Moraxellaceae|aph(3')-I	Moraxellaceae|aminoglycoside
sW1GLT1S2	GLT1S	GLTS	major_facilitator_superfamily_transporter	multidrug	MFST	Moraxellaceae	Moraxellaceae|major_facilitator_superfamily_transporter	Moraxellaceae|multidrug
sW1GLT1S2	GLT1S	GLTS	rphB	rifamycin	RPHB	Paenibacillaceae	Paenibacillaceae|rphB	Paenibacillaceae|rifamycin
sW1GLT1S2	GLT1S	GLTS	mexB	multidrug	MEXB	Burkholderiaceae	Burkholderiaceae|mexB	Burkholderiaceae|multidrug
sW1GLT1S2	GLT1S	GLTS	bacA	bacitracin	BACA	Paenibacillaceae	Paenibacillaceae|bacA	Paenibacillaceae|bacitracin
sW1GLT1S2	GLT1S	GLTS	ceoB	multidrug	CEOB	Burkholderiaceae	Burkholderiaceae|ceoB	Burkholderiaceae|multidrug
sW1GLT1S2	GLT1S	GLTS	MexK	multidrug	MEXK	Pseudomonadaceae	Pseudomonadaceae|MexK	Pseudomonadaceae|multidrug
sW1GLT1S2	GLT1S	GLTS	adeS	multidrug	ADES	Moraxellaceae	Moraxellaceae|adeS	Moraxellaceae|multidrug
sW1GLT1S2	GLT1S	GLTS	mdtB	multidrug	MDTB	Burkholderiaceae	Burkholderiaceae|mdtB	Burkholderiaceae|multidrug
sW1GLT1S2	GLT1S	GLTS	metallo-beta-lactamase	beta-lactam	METALLO-BETA-LACTAMASE	Caulobacteraceae	Caulobacteraceae|metallo-beta-lactamase	Caulobacteraceae|beta-lactam
sW1GLT1S2	GLT1S	GLTS	adeF	multidrug	ADEF	Oxalobacteraceae	Oxalobacteraceae|adeF	Oxalobacteraceae|multidrug
sW1GLT1S2	GLT1S	GLTS	rosA	fosmidomycin	ROSA	Burkholderiaceae	Burkholderiaceae|rosA	Burkholderiaceae|fosmidomycin
sW1GLT1S2	GLT1S	GLTS	mexT	multidrug	MEXT	Moraxellaceae	Moraxellaceae|mexT	Moraxellaceae|multidrug
sW1GLT1S2	GLT1S	GLTS	adeN	multidrug	ADEN	Moraxellaceae	Moraxellaceae|adeN	Moraxellaceae|multidrug
sW1GLT1S2	GLT1S	GLTS	multidrug_ABC_transporter	multidrug	ABC TRANSPORTER	Burkholderiaceae	Burkholderiaceae|multidrug_ABC_transporter	Burkholderiaceae|multidrug
sW1GLT1S2	GLT1S	GLTS	mdtL	multidrug	MDTL	Moraxellaceae	Moraxellaceae|mdtL	Moraxellaceae|multidrug
sW1GLT1S2	GLT1S	GLTS	bacA	bacitracin	BACA	Unclassified	Unclassified|bacA	Unclassified|bacitracin
sW1GLT1S2	GLT1S	GLTS	rosA	fosmidomycin	ROSA	Burkholderiaceae	Burkholderiaceae|rosA	Burkholderiaceae|fosmidomycin
sW1GLT1S2	GLT1S	GLTS	adeB	multidrug	ADEB	Moraxellaceae	Moraxellaceae|adeB	Moraxellaceae|multidrug
sW1GLT1S2	GLT1S	GLTS	mdtB	multidrug	MDTB	Burkholderiaceae	Burkholderiaceae|mdtB	Burkholderiaceae|multidrug
sW1GLT1S2	GLT1S	GLTS	mexB	multidrug	MEXB	Moraxellaceae	Moraxellaceae|mexB	Moraxellaceae|multidrug
sW1GLT1S2	GLT1S	GLTS	adeA	multidrug	ADEA	Moraxellaceae	Moraxellaceae|adeA	Moraxellaceae|multidrug
sW1GLT1S2	GLT1S	GLTS	adeR	multidrug	ADER	Moraxellaceae	Moraxellaceae|adeR	Moraxellaceae|multidrug
sW1GLT1S2	GLT1S	GLTS	bpeF	multidrug	BPEF	Burkholderiaceae	Burkholderiaceae|bpeF	Burkholderiaceae|multidrug
sW1GLT1S2	GLT1S	GLTS	tetA(48)	tetracycline	TETA(48)	Paenibacillaceae	Paenibacillaceae|tetA(48)	Paenibacillaceae|tetracycline
sW1GLT1S2	GLT1S	GLTS	mexE	multidrug	MEXE	Moraxellaceae	Moraxellaceae|mexE	Moraxellaceae|multidrug
sW1GLT1S2	GLT1S	GLTS	abeS	multidrug	ABES	Moraxellaceae	Moraxellaceae|abeS	Moraxellaceae|multidrug
sW1GLT1S2	GLT1S	GLTS	marR	multidrug	MARR	Moraxellaceae	Moraxellaceae|marR	Moraxellaceae|multidrug
sW1GLT1S2	GLT1S	GLTS	ceoB	multidrug	CEOB	Burkholderiaceae	Burkholderiaceae|ceoB	Burkholderiaceae|multidrug
sW1GLT1S2	GLT1S	GLTS	tetB(48)	tetracycline	TETB(48)	Paenibacillaceae	Paenibacillaceae|tetB(48)	Paenibacillaceae|tetracycline
sW1GLT1S2	GLT1S	GLTS	tetA(48)	tetracycline	TETA(48)	Paenibacillaceae	Paenibacillaceae|tetA(48)	Paenibacillaceae|tetracycline
sW1GLT1S2	GLT1S	GLTS	tetB(48)	tetracycline	TETB(48)	Paenibacillaceae	Paenibacillaceae|tetB(48)	Paenibacillaceae|tetracycline
sW1GLT1S2	GLT1S	GLTS	mdtL	multidrug	MDTL	Moraxellaceae	Moraxellaceae|mdtL	Moraxellaceae|multidrug
sW1GLT1S2	GLT1S	GLTS	acrB	multidrug	ACRB	Alcaligenaceae	Alcaligenaceae|acrB	Alcaligenaceae|multidrug
sW1GLT1S2	GLT1S	GLTS	oprM	multidrug	OPRM	Moraxellaceae	Moraxellaceae|oprM	Moraxellaceae|multidrug
sW1GLT1S2	GLT1S	GLTS	mexA	multidrug	MEXA	Pseudomonadaceae	Pseudomonadaceae|mexA	Pseudomonadaceae|multidrug
sW1GLT1S2	GLT1S	GLTS	mexB	multidrug	MEXB	Pseudomonadaceae	Pseudomonadaceae|mexB	Pseudomonadaceae|multidrug
sW1GLT1S2	GLT1S	GLTS	oprM	multidrug	OPRM	Pseudomonadaceae	Pseudomonadaceae|oprM	Pseudomonadaceae|multidrug
sW1GLT1S2	GLT1S	GLTS	adeB	multidrug	ADEB	Moraxellaceae	Moraxellaceae|adeB	Moraxellaceae|multidrug
sW1GLT1S2	GLT1S	GLTS	mexW	multidrug	MEXW	Pseudomonadaceae	Pseudomonadaceae|mexW	Pseudomonadaceae|multidrug
sW1GLT1S2	GLT1S	GLTS	mexT	multidrug	MEXT	Pseudomonadaceae	Pseudomonadaceae|mexT	Pseudomonadaceae|multidrug
sW1GLT1S2	GLT1S	GLTS	ADC-23	beta-lactam	ADC-23	Moraxellaceae	Moraxellaceae|ADC-23	Moraxellaceae|beta-lactam
sW1GLT1S2	GLT1S	GLTS	tetA(48)	tetracycline	TETA(48)	Paenibacillaceae	Paenibacillaceae|tetA(48)	Paenibacillaceae|tetracycline
sW1GLT1S2	GLT1S	GLTS	mexN	multidrug	MEXN	Pseudomonadaceae	Pseudomonadaceae|mexN	Pseudomonadaceae|multidrug
sW1GLT1S2	GLT1S	GLTS	bacA	bacitracin	BACA	Alcaligenaceae	Alcaligenaceae|bacA	Alcaligenaceae|bacitracin
sW1GLT1S2	GLT1S	GLTS	emrB	multidrug	EMRB	Sphingomonadaceae	Sphingomonadaceae|emrB	Sphingomonadaceae|multidrug
sW1GLT1S2	GLT1S	GLTS	tetA(48)	tetracycline	TETA(48)	Paenibacillaceae	Paenibacillaceae|tetA(48)	Paenibacillaceae|tetracycline
sW1GLT1S2	GLT1S	GLTS	MexK	multidrug	MEXK	Xanthomonadaceae	Xanthomonadaceae|MexK	Xanthomonadaceae|multidrug
sW1GLT1S2	GLT1S	GLTS	macA	MLS	MACA	Moraxellaceae	Moraxellaceae|macA	Moraxellaceae|MLS
sW1GLT1S2	GLT1S	GLTS	oprM	multidrug	OPRM	Moraxellaceae	Moraxellaceae|oprM	Moraxellaceae|multidrug
sW1GLT1S2	GLT1S	GLTS	bpeF	multidrug	BPEF	Burkholderiaceae	Burkholderiaceae|bpeF	Burkholderiaceae|multidrug
sW1GLT1S2	GLT1S	GLTS	bacA	bacitracin	BACA	Pseudomonadaceae	Pseudomonadaceae|bacA	Pseudomonadaceae|bacitracin
sW1GLT1S2	GLT1S	GLTS	bacA	bacitracin	BACA	Alcaligenaceae	Alcaligenaceae|bacA	Alcaligenaceae|bacitracin
sW1GLT1S2	GLT1S	GLTS	carO	beta-lactam	CARO	Moraxellaceae	Moraxellaceae|carO	Moraxellaceae|beta-lactam
sW1GLT1S2	GLT1S	GLTS	mexF	multidrug	MEXF	Rhodanobacteraceae	Rhodanobacteraceae|mexF	Rhodanobacteraceae|multidrug
sW1GLT1S2	GLT1S	GLTS	mexF	multidrug	MEXF	Rhodanobacteraceae	Rhodanobacteraceae|mexF	Rhodanobacteraceae|multidrug
sW1GLT1S2	GLT1S	GLTS	mexE	multidrug	MEXE	Burkholderiaceae	Burkholderiaceae|mexE	Burkholderiaceae|multidrug
sW1GLT1S2	GLT1S	GLTS	bpeF	multidrug	BPEF	Burkholderiaceae	Burkholderiaceae|bpeF	Burkholderiaceae|multidrug
sW1GLT1S2	GLT1S	GLTS	ceoB	multidrug	CEOB	Burkholderiaceae	Burkholderiaceae|ceoB	Burkholderiaceae|multidrug
sW1GLT1S2	GLT1S	GLTS	oprM	multidrug	OPRM	Moraxellaceae	Moraxellaceae|oprM	Moraxellaceae|multidrug
sW1GLT1S2	GLT1S	GLTS	adeB	multidrug	ADEB	Moraxellaceae	Moraxellaceae|adeB	Moraxellaceae|multidrug
sW1GLT1S2	GLT1S	GLTS	multidrug_ABC_transporter	multidrug	ABC TRANSPORTER	Alcaligenaceae	Alcaligenaceae|multidrug_ABC_transporter	Alcaligenaceae|multidrug
sW1GLT1S2	GLT1S	GLTS	mexB	multidrug	MEXB	Burkholderiaceae	Burkholderiaceae|mexB	Burkholderiaceae|multidrug
sW1GLT1S2	GLT1S	GLTS	vanB	glycopeptide	VANB	Paenibacillaceae	Paenibacillaceae|vanB	Paenibacillaceae|glycopeptide
sW1GLT1S2	GLT1S	GLTS	mexE	multidrug	MEXE	Burkholderiaceae	Burkholderiaceae|mexE	Burkholderiaceae|multidrug
sW1GLT1S2	GLT1S	GLTS	bpeF	multidrug	BPEF	Burkholderiaceae	Burkholderiaceae|bpeF	Burkholderiaceae|multidrug
sW1GLT1S2	GLT1S	GLTS	bpeF	multidrug	BPEF	Burkholderiaceae	Burkholderiaceae|bpeF	Burkholderiaceae|multidrug
sW1GLT1S2	GLT1S	GLTS	ADC-18	beta-lactam	ADC-18	Moraxellaceae	Moraxellaceae|ADC-18	Moraxellaceae|beta-lactam
sW1GLT1S2	GLT1S	GLTS	ADC-23	beta-lactam	ADC-23	Moraxellaceae	Moraxellaceae|ADC-23	Moraxellaceae|beta-lactam
sW1GLT1S2	GLT1S	GLTS	mexF	multidrug	MEXF	Nitrobacteraceae	Nitrobacteraceae|mexF	Nitrobacteraceae|multidrug
sW1GLT1S2	GLT1S	GLTS	rphB	rifamycin	RPHB	Paenibacillaceae	Paenibacillaceae|rphB	Paenibacillaceae|rifamycin
sW1GLT1S2	GLT1S	GLTS	bpeF	multidrug	BPEF	Burkholderiaceae	Burkholderiaceae|bpeF	Burkholderiaceae|multidrug
sW1GLT1S2	GLT1S	GLTS	major_facilitator_superfamily_transporter	multidrug	MFST	Moraxellaceae	Moraxellaceae|major_facilitator_superfamily_transporter	Moraxellaceae|multidrug
sW1GLT1S2	GLT1S	GLTS	bacA	bacitracin	BACA	Burkholderiaceae	Burkholderiaceae|bacA	Burkholderiaceae|bacitracin
sW1GLT1S2	GLT1S	GLTS	rosA	fosmidomycin	ROSA	Burkholderiaceae	Burkholderiaceae|rosA	Burkholderiaceae|fosmidomycin
sW1GLT1S2	GLT1S	GLTS	adeB	multidrug	ADEB	Moraxellaceae	Moraxellaceae|adeB	Moraxellaceae|multidrug
sW1GLT2R1	GLT2R	GLTR	mtrA	multidrug	MTRA	Microbacteriaceae	Microbacteriaceae|mtrA	Microbacteriaceae|multidrug
sW1GLT2R1	GLT2R	GLTR	adeJ	multidrug	ADEJ	Moraxellaceae	Moraxellaceae|adeJ	Moraxellaceae|multidrug
sW1GLT2R1	GLT2R	GLTR	BJP-1	beta-lactam	BJP-1	Nitrobacteraceae	Nitrobacteraceae|BJP-1	Nitrobacteraceae|beta-lactam
sW1GLT2R1	GLT2R	GLTR	macA	MLS	MACA	Moraxellaceae	Moraxellaceae|macA	Moraxellaceae|MLS
sW1GLT2R1	GLT2R	GLTR	mexE	multidrug	MEXE	Burkholderiaceae	Burkholderiaceae|mexE	Burkholderiaceae|multidrug
sW1GLT2R1	GLT2R	GLTR	bpeF	multidrug	BPEF	Burkholderiaceae	Burkholderiaceae|bpeF	Burkholderiaceae|multidrug
sW1GLT2R1	GLT2R	GLTR	ADC-22	beta-lactam	ADC-22	Moraxellaceae	Moraxellaceae|ADC-22	Moraxellaceae|beta-lactam
sW1GLT2R1	GLT2R	GLTR	mexF	multidrug	MEXF	Rhodanobacteraceae	Rhodanobacteraceae|mexF	Rhodanobacteraceae|multidrug
sW1GLT2R1	GLT2R	GLTR	mexF	multidrug	MEXF	Rhodanobacteraceae	Rhodanobacteraceae|mexF	Rhodanobacteraceae|multidrug
sW1GLT2R1	GLT2R	GLTR	bpeF	multidrug	BPEF	Burkholderiaceae	Burkholderiaceae|bpeF	Burkholderiaceae|multidrug
sW1GLT2R1	GLT2R	GLTR	mexF	multidrug	MEXF	Rhodanobacteraceae	Rhodanobacteraceae|mexF	Rhodanobacteraceae|multidrug
sW1GLT2R1	GLT2R	GLTR	acrB	multidrug	ACRB	Burkholderiaceae	Burkholderiaceae|acrB	Burkholderiaceae|multidrug
sW1GLT2R1	GLT2R	GLTR	mdtB	multidrug	MDTB	Oxalobacteraceae	Oxalobacteraceae|mdtB	Oxalobacteraceae|multidrug
sW1GLT2R1	GLT2R	GLTR	adeA	multidrug	ADEA	Moraxellaceae	Moraxellaceae|adeA	Moraxellaceae|multidrug
sW1GLT2R1	GLT2R	GLTR	adeB	multidrug	ADEB	Moraxellaceae	Moraxellaceae|adeB	Moraxellaceae|multidrug
sW1GLT2R1	GLT2R	GLTR	mexF	multidrug	MEXF	Aurantimonadaceae	Aurantimonadaceae|mexF	Aurantimonadaceae|multidrug
sW1GLT2R1	GLT2R	GLTR	vanR	glycopeptide	VANR	Streptomycetaceae	Streptomycetaceae|vanR	Streptomycetaceae|glycopeptide
sW1GLT2R1	GLT2R	GLTR	oqxB	multidrug	OQXB	Xanthomonadaceae	Xanthomonadaceae|oqxB	Xanthomonadaceae|multidrug
sW1GLT2R1	GLT2R	GLTR	rpoB2	multidrug	RPOB2	Sphingomonadaceae	Sphingomonadaceae|rpoB2	Sphingomonadaceae|multidrug
sW1GLT2R1	GLT2R	GLTR	ANT(3'')-IIa	aminoglycoside	ANT(3'')-IIA	Moraxellaceae	Moraxellaceae|ANT(3'')-IIa	Moraxellaceae|aminoglycoside
sW1GLT2R1	GLT2R	GLTR	bpeF	multidrug	BPEF	Burkholderiaceae	Burkholderiaceae|bpeF	Burkholderiaceae|multidrug
sW1GLT2R1	GLT2R	GLTR	mexB	multidrug	MEXB	Moraxellaceae	Moraxellaceae|mexB	Moraxellaceae|multidrug
sW1GLT2R1	GLT2R	GLTR	otrA	tetracycline	OTRA	Streptomycetaceae	Streptomycetaceae|otrA	Streptomycetaceae|tetracycline
sW1GLT2R1	GLT2R	GLTR	mexF	multidrug	MEXF	Pseudomonadaceae	Pseudomonadaceae|mexF	Pseudomonadaceae|multidrug
sW1GLT2R1	GLT2R	GLTR	mexE	multidrug	MEXE	Moraxellaceae	Moraxellaceae|mexE	Moraxellaceae|multidrug
sW1GLT2R1	GLT2R	GLTR	adeF	multidrug	ADEF	Moraxellaceae	Moraxellaceae|adeF	Moraxellaceae|multidrug
sW1GLT2R1	GLT2R	GLTR	adeH	multidrug	ADEH	Moraxellaceae	Moraxellaceae|adeH	Moraxellaceae|multidrug
sW1GLT2R1	GLT2R	GLTR	mdtL	multidrug	MDTL	Moraxellaceae	Moraxellaceae|mdtL	Moraxellaceae|multidrug
sW1GLT2R1	GLT2R	GLTR	rphB	rifamycin	RPHB	Chitinophagaceae	Chitinophagaceae|rphB	Chitinophagaceae|rifamycin
sW1GLT2R1	GLT2R	GLTR	mexF	multidrug	MEXF	Rhodanobacteraceae	Rhodanobacteraceae|mexF	Rhodanobacteraceae|multidrug
sW1GLT2R1	GLT2R	GLTR	bpeF	multidrug	BPEF	Oxalobacteraceae	Oxalobacteraceae|bpeF	Oxalobacteraceae|multidrug
sW1GLT2R1	GLT2R	GLTR	mexE	multidrug	MEXE	Burkholderiaceae	Burkholderiaceae|mexE	Burkholderiaceae|multidrug
sW1GLT2R1	GLT2R	GLTR	mexB	multidrug	MEXB	Moraxellaceae	Moraxellaceae|mexB	Moraxellaceae|multidrug
sW1GLT2R1	GLT2R	GLTR	oprM	multidrug	OPRM	Moraxellaceae	Moraxellaceae|oprM	Moraxellaceae|multidrug
sW1GLT2R1	GLT2R	GLTR	adeH	multidrug	ADEH	Moraxellaceae	Moraxellaceae|adeH	Moraxellaceae|multidrug
sW1GLT2R1	GLT2R	GLTR	AxyY	multidrug	AXYY	Burkholderiaceae	Burkholderiaceae|AxyY	Burkholderiaceae|multidrug
sW1GLT2R1	GLT2R	GLTR	aph(3')-I	aminoglycoside	APH(3')-I	Moraxellaceae	Moraxellaceae|aph(3')-I	Moraxellaceae|aminoglycoside
sW1GLT2R1	GLT2R	GLTR	ceoB	multidrug	CEOB	Unclassified	Unclassified|ceoB	Unclassified|multidrug
sW1GLT2R1	GLT2R	GLTR	mexF	multidrug	MEXF	Pseudomonadaceae	Pseudomonadaceae|mexF	Pseudomonadaceae|multidrug
sW1GLT2R1	GLT2R	GLTR	mdtL	multidrug	MDTL	Moraxellaceae	Moraxellaceae|mdtL	Moraxellaceae|multidrug
sW1GLT2R1	GLT2R	GLTR	rphB	rifamycin	RPHB	Unclassified	Unclassified|rphB	Unclassified|rifamycin
sW1GLT2R1	GLT2R	GLTR	MuxB	multidrug	MUXB	Nitrobacteraceae	Nitrobacteraceae|MuxB	Nitrobacteraceae|multidrug
sW1GLT2R1	GLT2R	GLTR	adeF	multidrug	ADEF	Pseudomonadaceae	Pseudomonadaceae|adeF	Pseudomonadaceae|multidrug
sW1GLT2R1	GLT2R	GLTR	mdtB	multidrug	MDTB	Oxalobacteraceae	Oxalobacteraceae|mdtB	Oxalobacteraceae|multidrug
sW1GLT2R1	GLT2R	GLTR	acrB	multidrug	ACRB	Oxalobacteraceae	Oxalobacteraceae|acrB	Oxalobacteraceae|multidrug
sW1GLT2R1	GLT2R	GLTR	OXA-421	beta-lactam	OXA	Moraxellaceae	Moraxellaceae|OXA	Moraxellaceae|beta-lactam
sW1GLT2R1	GLT2R	GLTR	multidrug_ABC_transporter	multidrug	ABC TRANSPORTER	Comamonadaceae	Comamonadaceae|multidrug_ABC_transporter	Comamonadaceae|multidrug
sW1GLT2R1	GLT2R	GLTR	oprC	multidrug	OPRC	Pseudomonadaceae	Pseudomonadaceae|oprC	Pseudomonadaceae|multidrug
sW1GLT2R1	GLT2R	GLTR	major_facilitator_superfamily_transporter	multidrug	MFST	Moraxellaceae	Moraxellaceae|major_facilitator_superfamily_transporter	Moraxellaceae|multidrug
sW1GLT2R1	GLT2R	GLTR	ceoB	multidrug	CEOB	Unclassified	Unclassified|ceoB	Unclassified|multidrug
sW1GLT2R1	GLT2R	GLTR	mdtB	multidrug	MDTB	Rhodanobacteraceae	Rhodanobacteraceae|mdtB	Rhodanobacteraceae|multidrug
sW1GLT2R1	GLT2R	GLTR	bacA	bacitracin	BACA	Burkholderiaceae	Burkholderiaceae|bacA	Burkholderiaceae|bacitracin
sW1GLT2R1	GLT2R	GLTR	arnA	peptide	ARNA	Pseudomonadaceae	Pseudomonadaceae|arnA	Pseudomonadaceae|peptide
sW1GLT2R1	GLT2R	GLTR	adeJ	multidrug	ADEJ	Moraxellaceae	Moraxellaceae|adeJ	Moraxellaceae|multidrug
sW1GLT2R1	GLT2R	GLTR	mexB	multidrug	MEXB	Moraxellaceae	Moraxellaceae|mexB	Moraxellaceae|multidrug
sW1GLT2R1	GLT2R	GLTR	acrB	multidrug	ACRB	Burkholderiaceae	Burkholderiaceae|acrB	Burkholderiaceae|multidrug
sW1GLT2R1	GLT2R	GLTR	rphB	rifamycin	RPHB	Chitinophagaceae	Chitinophagaceae|rphB	Chitinophagaceae|rifamycin
sW1GLT2R1	GLT2R	GLTR	oprM	multidrug	OPRM	Moraxellaceae	Moraxellaceae|oprM	Moraxellaceae|multidrug
sW1GLT2R1	GLT2R	GLTR	mdtB	multidrug	MDTB	Burkholderiaceae	Burkholderiaceae|mdtB	Burkholderiaceae|multidrug
sW1GLT2R1	GLT2R	GLTR	abeS	multidrug	ABES	Moraxellaceae	Moraxellaceae|abeS	Moraxellaceae|multidrug
sW1GLT2R1	GLT2R	GLTR	rpoB2	multidrug	RPOB2	Demequinaceae	Demequinaceae|rpoB2	Demequinaceae|multidrug
sW1GLT2R1	GLT2R	GLTR	tcmA	tetracenomycin_C	TCMA	Streptomycetaceae	Streptomycetaceae|tcmA	Streptomycetaceae|tetracenomycin_C
sW1GLT2R1	GLT2R	GLTR	carO	beta-lactam	CARO	Moraxellaceae	Moraxellaceae|carO	Moraxellaceae|beta-lactam
sW1GLT2R1	GLT2R	GLTR	rpoB2	multidrug	RPOB2	Streptomycetaceae	Streptomycetaceae|rpoB2	Streptomycetaceae|multidrug
sW1GLT2R1	GLT2R	GLTR	rpoB2	multidrug	RPOB2	Streptomycetaceae	Streptomycetaceae|rpoB2	Streptomycetaceae|multidrug
sW1GLT2R1	GLT2R	GLTR	vanR	glycopeptide	VANR	Streptomycetaceae	Streptomycetaceae|vanR	Streptomycetaceae|glycopeptide
sW1GLT2R1	GLT2R	GLTR	bpeF	multidrug	BPEF	Unclassified	Unclassified|bpeF	Unclassified|multidrug
sW1GLT2R1	GLT2R	GLTR	adeF	multidrug	ADEF	Enterobacteriaceae	Enterobacteriaceae|adeF	Enterobacteriaceae|multidrug
sW1GLT2R1	GLT2R	GLTR	mdtL	multidrug	MDTL	Moraxellaceae	Moraxellaceae|mdtL	Moraxellaceae|multidrug
sW1GLT2R1	GLT2R	GLTR	vanR	glycopeptide	VANR	Streptomycetaceae	Streptomycetaceae|vanR	Streptomycetaceae|glycopeptide
sW1GLT2R1	GLT2R	GLTR	macA	MLS	MACA	Moraxellaceae	Moraxellaceae|macA	Moraxellaceae|MLS
sW1GLT2R1	GLT2R	GLTR	adeB	multidrug	ADEB	Moraxellaceae	Moraxellaceae|adeB	Moraxellaceae|multidrug
sW1GLT2R1	GLT2R	GLTR	adeC	multidrug	ADEC	Moraxellaceae	Moraxellaceae|adeC	Moraxellaceae|multidrug
sW1GLT2R1	GLT2R	GLTR	bacA	bacitracin	BACA	Burkholderiaceae	Burkholderiaceae|bacA	Burkholderiaceae|bacitracin
sW1GLT2R1	GLT2R	GLTR	mdtB	multidrug	MDTB	Oxalobacteraceae	Oxalobacteraceae|mdtB	Oxalobacteraceae|multidrug
sW1GLT2R1	GLT2R	GLTR	opcM	multidrug	OPCM	Burkholderiaceae	Burkholderiaceae|opcM	Burkholderiaceae|multidrug
sW1GLT2R1	GLT2R	GLTR	mdtB	multidrug	MDTB	Erwiniaceae	Erwiniaceae|mdtB	Erwiniaceae|multidrug
sW1GLT2R1	GLT2R	GLTR	TolC	multidrug	TOLC	Moraxellaceae	Moraxellaceae|TolC	Moraxellaceae|multidrug
sW1GLT2R1	GLT2R	GLTR	adeF	multidrug	ADEF	Oxalobacteraceae	Oxalobacteraceae|adeF	Oxalobacteraceae|multidrug
sW1GLT2R1	GLT2R	GLTR	adeB	multidrug	ADEB	Moraxellaceae	Moraxellaceae|adeB	Moraxellaceae|multidrug
sW1GLT2R1	GLT2R	GLTR	adeB	multidrug	ADEB	Moraxellaceae	Moraxellaceae|adeB	Moraxellaceae|multidrug
sW1GLT2R1	GLT2R	GLTR	MuxB	multidrug	MUXB	Unclassified	Unclassified|MuxB	Unclassified|multidrug
sW1GLT2R1	GLT2R	GLTR	mexF	multidrug	MEXF	Comamonadaceae	Comamonadaceae|mexF	Comamonadaceae|multidrug
sW1GLT2R1	GLT2R	GLTR	ADC-18	beta-lactam	ADC-18	Moraxellaceae	Moraxellaceae|ADC-18	Moraxellaceae|beta-lactam
sW1GLT2R1	GLT2R	GLTR	mexT	multidrug	MEXT	Moraxellaceae	Moraxellaceae|mexT	Moraxellaceae|multidrug
sW1GLT2R1	GLT2R	GLTR	oqxB	multidrug	OQXB	Xanthomonadaceae	Xanthomonadaceae|oqxB	Xanthomonadaceae|multidrug
sW1GLT2R1	GLT2R	GLTR	mdtB	multidrug	MDTB	Beijerinckiaceae	Beijerinckiaceae|mdtB	Beijerinckiaceae|multidrug
sW1GLT2R1	GLT2R	GLTR	bpeF	multidrug	BPEF	Burkholderiaceae	Burkholderiaceae|bpeF	Burkholderiaceae|multidrug
sW1GLT2R1	GLT2R	GLTR	oqxB	multidrug	OQXB	Xanthomonadaceae	Xanthomonadaceae|oqxB	Xanthomonadaceae|multidrug
sW1GLT2R1	GLT2R	GLTR	mexF	multidrug	MEXF	Rhodanobacteraceae	Rhodanobacteraceae|mexF	Rhodanobacteraceae|multidrug
sW1GLT2R1	GLT2R	GLTR	MuxB	multidrug	MUXB	Burkholderiaceae	Burkholderiaceae|MuxB	Burkholderiaceae|multidrug
sW1GLT2R1	GLT2R	GLTR	multidrug_ABC_transporter	multidrug	ABC TRANSPORTER	Unclassified	Unclassified|multidrug_ABC_transporter	Unclassified|multidrug
sW1GLT2R1	GLT2R	GLTR	mexT	multidrug	MEXT	Moraxellaceae	Moraxellaceae|mexT	Moraxellaceae|multidrug
sW1GLT2R1	GLT2R	GLTR	mdtK	multidrug	MDTK	Moraxellaceae	Moraxellaceae|mdtK	Moraxellaceae|multidrug
sW1GLT2R1	GLT2R	GLTR	adeF	multidrug	ADEF	Rhizobiaceae	Rhizobiaceae|adeF	Rhizobiaceae|multidrug
sW1GLT2R1	GLT2R	GLTR	oprM	multidrug	OPRM	Moraxellaceae	Moraxellaceae|oprM	Moraxellaceae|multidrug
sW1GLT2R1	GLT2R	GLTR	abeS	multidrug	ABES	Moraxellaceae	Moraxellaceae|abeS	Moraxellaceae|multidrug
sW1GLT2R1	GLT2R	GLTR	ceoB	multidrug	CEOB	Burkholderiaceae	Burkholderiaceae|ceoB	Burkholderiaceae|multidrug
sW1GLT2R1	GLT2R	GLTR	tetB(48)	tetracycline	TETB(48)	Microbacteriaceae	Microbacteriaceae|tetB(48)	Microbacteriaceae|tetracycline
sW1GLT2R1	GLT2R	GLTR	adeC	multidrug	ADEC	Moraxellaceae	Moraxellaceae|adeC	Moraxellaceae|multidrug
sW1GLT2R1	GLT2R	GLTR	rpoB2	multidrug	RPOB2	Micromonosporaceae	Micromonosporaceae|rpoB2	Micromonosporaceae|multidrug
sW1GLT2R1	GLT2R	GLTR	abeM	multidrug	ABEM	Moraxellaceae	Moraxellaceae|abeM	Moraxellaceae|multidrug
sW1GLT2R1	GLT2R	GLTR	mdtL	multidrug	MDTL	Moraxellaceae	Moraxellaceae|mdtL	Moraxellaceae|multidrug
sW1GLT2R1	GLT2R	GLTR	mdtL	multidrug	MDTL	Moraxellaceae	Moraxellaceae|mdtL	Moraxellaceae|multidrug
sW1GLT2R1	GLT2R	GLTR	marR	multidrug	MARR	Moraxellaceae	Moraxellaceae|marR	Moraxellaceae|multidrug
sW1GLT2R1	GLT2R	GLTR	adeH	multidrug	ADEH	Moraxellaceae	Moraxellaceae|adeH	Moraxellaceae|multidrug
sW1GLT2R1	GLT2R	GLTR	adeJ	multidrug	ADEJ	Moraxellaceae	Moraxellaceae|adeJ	Moraxellaceae|multidrug
sW1GLT2R1	GLT2R	GLTR	adeK	multidrug	ADEK	Moraxellaceae	Moraxellaceae|adeK	Moraxellaceae|multidrug
sW1GLT2R1	GLT2R	GLTR	vanR	glycopeptide	VANR	Streptomycetaceae	Streptomycetaceae|vanR	Streptomycetaceae|glycopeptide
sW1GLT2R1	GLT2R	GLTR	mtrA	multidrug	MTRA	Micromonosporaceae	Micromonosporaceae|mtrA	Micromonosporaceae|multidrug
sW1GLT2R1	GLT2R	GLTR	oqxB	multidrug	OQXB	Burkholderiaceae	Burkholderiaceae|oqxB	Burkholderiaceae|multidrug
sW1GLT2R1	GLT2R	GLTR	major_facilitator_superfamily_transporter	multidrug	MFST	Moraxellaceae	Moraxellaceae|major_facilitator_superfamily_transporter	Moraxellaceae|multidrug
sW1GLT2R1	GLT2R	GLTR	bacA	bacitracin	BACA	Burkholderiaceae	Burkholderiaceae|bacA	Burkholderiaceae|bacitracin
sW1GLT2R1	GLT2R	GLTR	mexX	multidrug	MEXX	Burkholderiaceae	Burkholderiaceae|mexX	Burkholderiaceae|multidrug
sW1GLT2R1	GLT2R	GLTR	amrB	multidrug	AMRB	Burkholderiaceae	Burkholderiaceae|amrB	Burkholderiaceae|multidrug
sW1GLT2R1	GLT2R	GLTR	mexB	multidrug	MEXB	Sphingomonadaceae	Sphingomonadaceae|mexB	Sphingomonadaceae|multidrug
sW1GLT2R1	GLT2R	GLTR	tetA(48)	tetracycline	TETA(48)	Microbacteriaceae	Microbacteriaceae|tetA(48)	Microbacteriaceae|tetracycline
sW1GLT2R1	GLT2R	GLTR	multidrug_ABC_transporter	multidrug	ABC TRANSPORTER	Burkholderiaceae	Burkholderiaceae|multidrug_ABC_transporter	Burkholderiaceae|multidrug
sW1GLT2R1	GLT2R	GLTR	mdtB	multidrug	MDTB	Chromobacteriaceae	Chromobacteriaceae|mdtB	Chromobacteriaceae|multidrug
sW1GLT2R1	GLT2R	GLTR	oqxB	multidrug	OQXB	Xanthomonadaceae	Xanthomonadaceae|oqxB	Xanthomonadaceae|multidrug
sW1GLT2R1	GLT2R	GLTR	mexT	multidrug	MEXT	Pseudomonadaceae	Pseudomonadaceae|mexT	Pseudomonadaceae|multidrug
sW1GLT2R1	GLT2R	GLTR	bacA	bacitracin	BACA	Pseudomonadaceae	Pseudomonadaceae|bacA	Pseudomonadaceae|bacitracin
sW1GLT2R1	GLT2R	GLTR	mdtC	multidrug	MDTC	Burkholderiaceae	Burkholderiaceae|mdtC	Burkholderiaceae|multidrug
sW1GLT2R1	GLT2R	GLTR	BJP-1	beta-lactam	BJP-1	Nitrobacteraceae	Nitrobacteraceae|BJP-1	Nitrobacteraceae|beta-lactam
sW1GLT2R1	GLT2R	GLTR	mexE	multidrug	MEXE	Moraxellaceae	Moraxellaceae|mexE	Moraxellaceae|multidrug
sW1GLT2R1	GLT2R	GLTR	acrB	multidrug	ACRB	Hyphomicrobiaceae	Hyphomicrobiaceae|acrB	Hyphomicrobiaceae|multidrug
sW1GLT2R1	GLT2R	GLTR	bpeF	multidrug	BPEF	Burkholderiaceae	Burkholderiaceae|bpeF	Burkholderiaceae|multidrug
sW1GLT2R1	GLT2R	GLTR	bpeF	multidrug	BPEF	Burkholderiaceae	Burkholderiaceae|bpeF	Burkholderiaceae|multidrug
sW1GLT2R1	GLT2R	GLTR	mexA	multidrug	MEXA	Pseudomonadaceae	Pseudomonadaceae|mexA	Pseudomonadaceae|multidrug
sW1GLT2R1	GLT2R	GLTR	mexB	multidrug	MEXB	Pseudomonadaceae	Pseudomonadaceae|mexB	Pseudomonadaceae|multidrug
sW1GLT2R1	GLT2R	GLTR	oprM	multidrug	OPRM	Pseudomonadaceae	Pseudomonadaceae|oprM	Pseudomonadaceae|multidrug
sW1GLT2R1	GLT2R	GLTR	major_facilitator_superfamily_transporter	multidrug	MFST	Moraxellaceae	Moraxellaceae|major_facilitator_superfamily_transporter	Moraxellaceae|multidrug
sW1GLT2R1	GLT2R	GLTR	MexK	multidrug	MEXK	Xanthomonadaceae	Xanthomonadaceae|MexK	Xanthomonadaceae|multidrug
sW1GLT2R1	GLT2R	GLTR	emrB	multidrug	EMRB	Moraxellaceae	Moraxellaceae|emrB	Moraxellaceae|multidrug
sW1GLT2R1	GLT2R	GLTR	ompR	multidrug	OMPR	Moraxellaceae	Moraxellaceae|ompR	Moraxellaceae|multidrug
sW1GLT2R1	GLT2R	GLTR	multidrug_ABC_transporter	multidrug	ABC TRANSPORTER	Streptomycetaceae	Streptomycetaceae|multidrug_ABC_transporter	Streptomycetaceae|multidrug
sW1GLT2R1	GLT2R	GLTR	mdfA	multidrug	MDFA	Moraxellaceae	Moraxellaceae|mdfA	Moraxellaceae|multidrug
sW1GLT2R1	GLT2R	GLTR	rpoB2	multidrug	RPOB2	Nocardioidaceae	Nocardioidaceae|rpoB2	Nocardioidaceae|multidrug
sW1GLT2R1	GLT2R	GLTR	bpeF	multidrug	BPEF	Burkholderiaceae	Burkholderiaceae|bpeF	Burkholderiaceae|multidrug
sW1GLT2R1	GLT2R	GLTR	oleC	MLS	OLEC	Streptomycetaceae	Streptomycetaceae|oleC	Streptomycetaceae|MLS
sW1GLT2R1	GLT2R	GLTR	emrB	multidrug	EMRB	Moraxellaceae	Moraxellaceae|emrB	Moraxellaceae|multidrug
sW1GLT2R1	GLT2R	GLTR	ceoB	multidrug	CEOB	Burkholderiaceae	Burkholderiaceae|ceoB	Burkholderiaceae|multidrug
sW1GLT2R1	GLT2R	GLTR	mdtB	multidrug	MDTB	Pseudomonadaceae	Pseudomonadaceae|mdtB	Pseudomonadaceae|multidrug
sW1GLT2R1	GLT2R	GLTR	oprM	multidrug	OPRM	Moraxellaceae	Moraxellaceae|oprM	Moraxellaceae|multidrug
sW1GLT2R1	GLT2R	GLTR	mdtB	multidrug	MDTB	Acetobacteraceae	Acetobacteraceae|mdtB	Acetobacteraceae|multidrug
sW1GLT2R1	GLT2R	GLTR	opcM	multidrug	OPCM	Burkholderiaceae	Burkholderiaceae|opcM	Burkholderiaceae|multidrug
sW1GLT2R1	GLT2R	GLTR	ceoB	multidrug	CEOB	Burkholderiaceae	Burkholderiaceae|ceoB	Burkholderiaceae|multidrug
sW1GLT2R1	GLT2R	GLTR	mexE	multidrug	MEXE	Burkholderiaceae	Burkholderiaceae|mexE	Burkholderiaceae|multidrug
sW1GLT2R1	GLT2R	GLTR	adeC	multidrug	ADEC	Moraxellaceae	Moraxellaceae|adeC	Moraxellaceae|multidrug
sW1GLT2R1	GLT2R	GLTR	ceoB	multidrug	CEOB	Burkholderiaceae	Burkholderiaceae|ceoB	Burkholderiaceae|multidrug
sW1GLT2R1	GLT2R	GLTR	adeF	multidrug	ADEF	Oxalobacteraceae	Oxalobacteraceae|adeF	Oxalobacteraceae|multidrug
sW1GLT2R1	GLT2R	GLTR	mexN	multidrug	MEXN	Pseudomonadaceae	Pseudomonadaceae|mexN	Pseudomonadaceae|multidrug
sW1GLT2R1	GLT2R	GLTR	multidrug_ABC_transporter	multidrug	ABC TRANSPORTER	Burkholderiaceae	Burkholderiaceae|multidrug_ABC_transporter	Burkholderiaceae|multidrug
sW1GLT2R1	GLT2R	GLTR	mexF	multidrug	MEXF	Pseudomonadaceae	Pseudomonadaceae|mexF	Pseudomonadaceae|multidrug
sW1GLT2R1	GLT2R	GLTR	mexE	multidrug	MEXE	Pseudomonadaceae	Pseudomonadaceae|mexE	Pseudomonadaceae|multidrug
sW1GLT2R1	GLT2R	GLTR	mexF	multidrug	MEXF	Caulobacteraceae	Caulobacteraceae|mexF	Caulobacteraceae|multidrug
sW1GLT2R1	GLT2R	GLTR	vanX	glycopeptide	VANX	Streptomycetaceae	Streptomycetaceae|vanX	Streptomycetaceae|glycopeptide
sW1GLT2R1	GLT2R	GLTR	mexF	multidrug	MEXF	Pseudomonadaceae	Pseudomonadaceae|mexF	Pseudomonadaceae|multidrug
sW1GLT2R1	GLT2R	GLTR	oprM	multidrug	OPRM	Moraxellaceae	Moraxellaceae|oprM	Moraxellaceae|multidrug
sW1GLT2R1	GLT2R	GLTR	mexF	multidrug	MEXF	Rhodanobacteraceae	Rhodanobacteraceae|mexF	Rhodanobacteraceae|multidrug
sW1GLT2R1	GLT2R	GLTR	smeE	multidrug	SMEE	Aeromonadaceae	Aeromonadaceae|smeE	Aeromonadaceae|multidrug
sW1GLT2R1	GLT2R	GLTR	ANT(3'')-IIa	aminoglycoside	ANT(3'')-IIA	Moraxellaceae	Moraxellaceae|ANT(3'')-IIa	Moraxellaceae|aminoglycoside
sW1GLT2R1	GLT2R	GLTR	adeB	multidrug	ADEB	Moraxellaceae	Moraxellaceae|adeB	Moraxellaceae|multidrug
sW1GLT2R1	GLT2R	GLTR	adeA	multidrug	ADEA	Moraxellaceae	Moraxellaceae|adeA	Moraxellaceae|multidrug
sW1GLT2R1	GLT2R	GLTR	adeR	multidrug	ADER	Moraxellaceae	Moraxellaceae|adeR	Moraxellaceae|multidrug
sW1GLT2R1	GLT2R	GLTR	adeS	multidrug	ADES	Moraxellaceae	Moraxellaceae|adeS	Moraxellaceae|multidrug
sW1GLT2R1	GLT2R	GLTR	multidrug_ABC_transporter	multidrug	ABC TRANSPORTER	Streptomycetaceae	Streptomycetaceae|multidrug_ABC_transporter	Streptomycetaceae|multidrug
sW1GLT2R1	GLT2R	GLTR	mdfA	multidrug	MDFA	Moraxellaceae	Moraxellaceae|mdfA	Moraxellaceae|multidrug
sW1GLT2R1	GLT2R	GLTR	ADC-22	beta-lactam	ADC-22	Moraxellaceae	Moraxellaceae|ADC-22	Moraxellaceae|beta-lactam
sW1GLT2R1	GLT2R	GLTR	oprC	multidrug	OPRC	Burkholderiaceae	Burkholderiaceae|oprC	Burkholderiaceae|multidrug
sW1GLT2R1	GLT2R	GLTR	MuxB	multidrug	MUXB	Burkholderiaceae	Burkholderiaceae|MuxB	Burkholderiaceae|multidrug
sW1GLT2R1	GLT2R	GLTR	vanX	glycopeptide	VANX	Streptomycetaceae	Streptomycetaceae|vanX	Streptomycetaceae|glycopeptide
sW1GLT2R1	GLT2R	GLTR	mexF	multidrug	MEXF	Nitrobacteraceae	Nitrobacteraceae|mexF	Nitrobacteraceae|multidrug
sW1GLT2R1	GLT2R	GLTR	tetB(48)	tetracycline	TETB(48)	Unclassified	Unclassified|tetB(48)	Unclassified|tetracycline
sW1GLT2R1	GLT2R	GLTR	bacA	bacitracin	BACA	Burkholderiaceae	Burkholderiaceae|bacA	Burkholderiaceae|bacitracin
sW1GLT2R1	GLT2R	GLTR	MuxB	multidrug	MUXB	Pseudomonadaceae	Pseudomonadaceae|MuxB	Pseudomonadaceae|multidrug
sW1GLT2R1	GLT2R	GLTR	MuxC	multidrug	MUXC	Pseudomonadaceae	Pseudomonadaceae|MuxC	Pseudomonadaceae|multidrug
sW1GLT2R1	GLT2R	GLTR	multidrug_ABC_transporter	multidrug	ABC TRANSPORTER	Streptomycetaceae	Streptomycetaceae|multidrug_ABC_transporter	Streptomycetaceae|multidrug
sW1GLT2R1	GLT2R	GLTR	mexF	multidrug	MEXF	Oxalobacteraceae	Oxalobacteraceae|mexF	Oxalobacteraceae|multidrug
sW1GLT2R1	GLT2R	GLTR	tetR	tetracycline	TETR	Moraxellaceae	Moraxellaceae|tetR	Moraxellaceae|tetracycline
sW1GLT2R1	GLT2R	GLTR	OXA-421	beta-lactam	OXA	Moraxellaceae	Moraxellaceae|OXA	Moraxellaceae|beta-lactam
sW1GLT2R1	GLT2R	GLTR	vanX	glycopeptide	VANX	Unclassified	Unclassified|vanX	Unclassified|glycopeptide
sW1GLT2R1	GLT2R	GLTR	macA	MLS	MACA	Moraxellaceae	Moraxellaceae|macA	Moraxellaceae|MLS
sW1GLT2R1	GLT2R	GLTR	oqxB	multidrug	OQXB	Xanthomonadaceae	Xanthomonadaceae|oqxB	Xanthomonadaceae|multidrug
sW1GLT2R1	GLT2R	GLTR	marR	multidrug	MARR	Moraxellaceae	Moraxellaceae|marR	Moraxellaceae|multidrug
sW1GLT2R1	GLT2R	GLTR	tcmA	tetracenomycin_C	TCMA	Streptomycetaceae	Streptomycetaceae|tcmA	Streptomycetaceae|tetracenomycin_C
sW1GLT2R1	GLT2R	GLTR	adeI	multidrug	ADEI	Moraxellaceae	Moraxellaceae|adeI	Moraxellaceae|multidrug
sW1GLT2R1	GLT2R	GLTR	ceoB	multidrug	CEOB	Burkholderiaceae	Burkholderiaceae|ceoB	Burkholderiaceae|multidrug
sW1GLT2R1	GLT2R	GLTR	mexE	multidrug	MEXE	Burkholderiaceae	Burkholderiaceae|mexE	Burkholderiaceae|multidrug
sW1GLT2R1	GLT2R	GLTR	adeI	multidrug	ADEI	Moraxellaceae	Moraxellaceae|adeI	Moraxellaceae|multidrug
sW1GLT2R1	GLT2R	GLTR	adeJ	multidrug	ADEJ	Moraxellaceae	Moraxellaceae|adeJ	Moraxellaceae|multidrug
sW1GLT2R1	GLT2R	GLTR	vanA	glycopeptide	VANA	Micromonosporaceae	Micromonosporaceae|vanA	Micromonosporaceae|glycopeptide
sW1GLT2R1	GLT2R	GLTR	ceoB	multidrug	CEOB	Burkholderiaceae	Burkholderiaceae|ceoB	Burkholderiaceae|multidrug
sW1GLT2R1	GLT2R	GLTR	mdtB	multidrug	MDTB	Oxalobacteraceae	Oxalobacteraceae|mdtB	Oxalobacteraceae|multidrug
sW1GLT2R1	GLT2R	GLTR	mexF	multidrug	MEXF	Pseudomonadaceae	Pseudomonadaceae|mexF	Pseudomonadaceae|multidrug
sW1GLT2R1	GLT2R	GLTR	MexK	multidrug	MEXK	Pseudomonadaceae	Pseudomonadaceae|MexK	Pseudomonadaceae|multidrug
sW1GLT2R1	GLT2R	GLTR	carO	beta-lactam	CARO	Moraxellaceae	Moraxellaceae|carO	Moraxellaceae|beta-lactam
sW1GLT2R1	GLT2R	GLTR	opcM	multidrug	OPCM	Burkholderiaceae	Burkholderiaceae|opcM	Burkholderiaceae|multidrug
sW1GLT2R1	GLT2R	GLTR	adeH	multidrug	ADEH	Moraxellaceae	Moraxellaceae|adeH	Moraxellaceae|multidrug
sW1GLT2R1	GLT2R	GLTR	adeJ	multidrug	ADEJ	Moraxellaceae	Moraxellaceae|adeJ	Moraxellaceae|multidrug
sW1GLT2R1	GLT2R	GLTR	adeC	multidrug	ADEC	Moraxellaceae	Moraxellaceae|adeC	Moraxellaceae|multidrug
sW1GLT2R1	GLT2R	GLTR	bacA	bacitracin	BACA	Comamonadaceae	Comamonadaceae|bacA	Comamonadaceae|bacitracin
sW1GLT2R1	GLT2R	GLTR	mexW	multidrug	MEXW	Pseudomonadaceae	Pseudomonadaceae|mexW	Pseudomonadaceae|multidrug
sW1GLT2R1	GLT2R	GLTR	MvaT	multidrug	MVAT	Pseudomonadaceae	Pseudomonadaceae|MvaT	Pseudomonadaceae|multidrug
sW1GLT2R1	GLT2R	GLTR	mexB	multidrug	MEXB	Pseudomonadaceae	Pseudomonadaceae|mexB	Pseudomonadaceae|multidrug
sW1GLT2R1	GLT2R	GLTR	mexA	multidrug	MEXA	Pseudomonadaceae	Pseudomonadaceae|mexA	Pseudomonadaceae|multidrug
sW1GLT2R1	GLT2R	GLTR	OpmH	triclosan	OPMH	Pseudomonadaceae	Pseudomonadaceae|OpmH	Pseudomonadaceae|triclosan
sW1GLT2R1	GLT2R	GLTR	mdtK	multidrug	MDTK	Moraxellaceae	Moraxellaceae|mdtK	Moraxellaceae|multidrug
sW1GLT2R1	GLT2R	GLTR	adeJ	multidrug	ADEJ	Moraxellaceae	Moraxellaceae|adeJ	Moraxellaceae|multidrug
sW1GLT2R2	GLT2R	GLTR	macA	MLS	MACA	Moraxellaceae	Moraxellaceae|macA	Moraxellaceae|MLS
sW1GLT2R2	GLT2R	GLTR	oprM	multidrug	OPRM	Moraxellaceae	Moraxellaceae|oprM	Moraxellaceae|multidrug
sW1GLT2R2	GLT2R	GLTR	oprC	multidrug	OPRC	Burkholderiaceae	Burkholderiaceae|oprC	Burkholderiaceae|multidrug
sW1GLT2R2	GLT2R	GLTR	mexF	multidrug	MEXF	Rhodanobacteraceae	Rhodanobacteraceae|mexF	Rhodanobacteraceae|multidrug
sW1GLT2R2	GLT2R	GLTR	rphB	rifamycin	RPHB	Bacillaceae	Bacillaceae|rphB	Bacillaceae|rifamycin
sW1GLT2R2	GLT2R	GLTR	bpeF	multidrug	BPEF	Burkholderiaceae	Burkholderiaceae|bpeF	Burkholderiaceae|multidrug
sW1GLT2R2	GLT2R	GLTR	ceoB	multidrug	CEOB	Burkholderiaceae	Burkholderiaceae|ceoB	Burkholderiaceae|multidrug
sW1GLT2R2	GLT2R	GLTR	ceoB	multidrug	CEOB	Burkholderiaceae	Burkholderiaceae|ceoB	Burkholderiaceae|multidrug
sW1GLT2R2	GLT2R	GLTR	abeM	multidrug	ABEM	Moraxellaceae	Moraxellaceae|abeM	Moraxellaceae|multidrug
sW1GLT2R2	GLT2R	GLTR	ANT(3'')-IIa	aminoglycoside	ANT(3'')-IIA	Moraxellaceae	Moraxellaceae|ANT(3'')-IIa	Moraxellaceae|aminoglycoside
sW1GLT2R2	GLT2R	GLTR	mexF	multidrug	MEXF	Rhodanobacteraceae	Rhodanobacteraceae|mexF	Rhodanobacteraceae|multidrug
sW1GLT2R2	GLT2R	GLTR	MuxB	multidrug	MUXB	Burkholderiaceae	Burkholderiaceae|MuxB	Burkholderiaceae|multidrug
sW1GLT2R2	GLT2R	GLTR	bacA	bacitracin	BACA	Devosiaceae	Devosiaceae|bacA	Devosiaceae|bacitracin
sW1GLT2R2	GLT2R	GLTR	oqxB	multidrug	OQXB	Xanthomonadaceae	Xanthomonadaceae|oqxB	Xanthomonadaceae|multidrug
sW1GLT2R2	GLT2R	GLTR	adeH	multidrug	ADEH	Moraxellaceae	Moraxellaceae|adeH	Moraxellaceae|multidrug
sW1GLT2R2	GLT2R	GLTR	mexB	multidrug	MEXB	Moraxellaceae	Moraxellaceae|mexB	Moraxellaceae|multidrug
sW1GLT2R2	GLT2R	GLTR	mdtK	multidrug	MDTK	Moraxellaceae	Moraxellaceae|mdtK	Moraxellaceae|multidrug
sW1GLT2R2	GLT2R	GLTR	AcrF	multidrug	ACRF	Burkholderiaceae	Burkholderiaceae|AcrF	Burkholderiaceae|multidrug
sW1GLT2R2	GLT2R	GLTR	adeS	multidrug	ADES	Moraxellaceae	Moraxellaceae|adeS	Moraxellaceae|multidrug
sW1GLT2R2	GLT2R	GLTR	adeH	multidrug	ADEH	Moraxellaceae	Moraxellaceae|adeH	Moraxellaceae|multidrug
sW1GLT2R2	GLT2R	GLTR	mexT	multidrug	MEXT	Moraxellaceae	Moraxellaceae|mexT	Moraxellaceae|multidrug
sW1GLT2R2	GLT2R	GLTR	BJP-1	beta-lactam	BJP-1	Nitrobacteraceae	Nitrobacteraceae|BJP-1	Nitrobacteraceae|beta-lactam
sW1GLT2R2	GLT2R	GLTR	ADC-22	beta-lactam	ADC-22	Moraxellaceae	Moraxellaceae|ADC-22	Moraxellaceae|beta-lactam
sW1GLT2R2	GLT2R	GLTR	MvaT	multidrug	MVAT	Pseudomonadaceae	Pseudomonadaceae|MvaT	Pseudomonadaceae|multidrug
sW1GLT2R2	GLT2R	GLTR	mexW	multidrug	MEXW	Pseudomonadaceae	Pseudomonadaceae|mexW	Pseudomonadaceae|multidrug
sW1GLT2R2	GLT2R	GLTR	mexB	multidrug	MEXB	Burkholderiaceae	Burkholderiaceae|mexB	Burkholderiaceae|multidrug
sW1GLT2R2	GLT2R	GLTR	ceoB	multidrug	CEOB	Burkholderiaceae	Burkholderiaceae|ceoB	Burkholderiaceae|multidrug
sW1GLT2R2	GLT2R	GLTR	vanR	glycopeptide	VANR	Streptomycetaceae	Streptomycetaceae|vanR	Streptomycetaceae|glycopeptide
sW1GLT2R2	GLT2R	GLTR	mexN	multidrug	MEXN	Pseudomonadaceae	Pseudomonadaceae|mexN	Pseudomonadaceae|multidrug
sW1GLT2R2	GLT2R	GLTR	aac(3)-VII	aminoglycoside	AAC(3)-VII	Streptomycetaceae	Streptomycetaceae|aac(3)-VII	Streptomycetaceae|aminoglycoside
sW1GLT2R2	GLT2R	GLTR	mdtB	multidrug	MDTB	Phyllobacteriaceae	Phyllobacteriaceae|mdtB	Phyllobacteriaceae|multidrug
sW1GLT2R2	GLT2R	GLTR	rpoB2	multidrug	RPOB2	Micromonosporaceae	Micromonosporaceae|rpoB2	Micromonosporaceae|multidrug
sW1GLT2R2	GLT2R	GLTR	MuxB	multidrug	MUXB	Pseudomonadaceae	Pseudomonadaceae|MuxB	Pseudomonadaceae|multidrug
sW1GLT2R2	GLT2R	GLTR	MuxC	multidrug	MUXC	Pseudomonadaceae	Pseudomonadaceae|MuxC	Pseudomonadaceae|multidrug
sW1GLT2R2	GLT2R	GLTR	ADC-22	beta-lactam	ADC-22	Moraxellaceae	Moraxellaceae|ADC-22	Moraxellaceae|beta-lactam
sW1GLT2R2	GLT2R	GLTR	adeK	multidrug	ADEK	Moraxellaceae	Moraxellaceae|adeK	Moraxellaceae|multidrug
sW1GLT2R2	GLT2R	GLTR	adeJ	multidrug	ADEJ	Moraxellaceae	Moraxellaceae|adeJ	Moraxellaceae|multidrug
sW1GLT2R2	GLT2R	GLTR	adeI	multidrug	ADEI	Moraxellaceae	Moraxellaceae|adeI	Moraxellaceae|multidrug
sW1GLT2R2	GLT2R	GLTR	ceoB	multidrug	CEOB	Burkholderiaceae	Burkholderiaceae|ceoB	Burkholderiaceae|multidrug
sW1GLT2R2	GLT2R	GLTR	abeS	multidrug	ABES	Moraxellaceae	Moraxellaceae|abeS	Moraxellaceae|multidrug
sW1GLT2R2	GLT2R	GLTR	bacA	bacitracin	BACA	Burkholderiaceae	Burkholderiaceae|bacA	Burkholderiaceae|bacitracin
sW1GLT2R2	GLT2R	GLTR	ceoB	multidrug	CEOB	Burkholderiaceae	Burkholderiaceae|ceoB	Burkholderiaceae|multidrug
sW1GLT2R2	GLT2R	GLTR	rpoB2	multidrug	RPOB2	Caulobacteraceae	Caulobacteraceae|rpoB2	Caulobacteraceae|multidrug
sW1GLT2R2	GLT2R	GLTR	adeH	multidrug	ADEH	Moraxellaceae	Moraxellaceae|adeH	Moraxellaceae|multidrug
sW1GLT2R2	GLT2R	GLTR	oprM	multidrug	OPRM	Moraxellaceae	Moraxellaceae|oprM	Moraxellaceae|multidrug
sW1GLT2R2	GLT2R	GLTR	mdtB	multidrug	MDTB	Comamonadaceae	Comamonadaceae|mdtB	Comamonadaceae|multidrug
sW1GLT2R2	GLT2R	GLTR	ADC-44	beta-lactam	ADC-44	Moraxellaceae	Moraxellaceae|ADC-44	Moraxellaceae|beta-lactam
sW1GLT2R2	GLT2R	GLTR	bacA	bacitracin	BACA	Burkholderiaceae	Burkholderiaceae|bacA	Burkholderiaceae|bacitracin
sW1GLT2R2	GLT2R	GLTR	ceoB	multidrug	CEOB	Burkholderiaceae	Burkholderiaceae|ceoB	Burkholderiaceae|multidrug
sW1GLT2R2	GLT2R	GLTR	rpoB2	multidrug	RPOB2	Unclassified	Unclassified|rpoB2	Unclassified|multidrug
sW1GLT2R2	GLT2R	GLTR	mexF	multidrug	MEXF	Pseudomonadaceae	Pseudomonadaceae|mexF	Pseudomonadaceae|multidrug
sW1GLT2R2	GLT2R	GLTR	oprM	multidrug	OPRM	Moraxellaceae	Moraxellaceae|oprM	Moraxellaceae|multidrug
sW1GLT2R2	GLT2R	GLTR	adeH	multidrug	ADEH	Moraxellaceae	Moraxellaceae|adeH	Moraxellaceae|multidrug
sW1GLT2R2	GLT2R	GLTR	mdfA	multidrug	MDFA	Moraxellaceae	Moraxellaceae|mdfA	Moraxellaceae|multidrug
sW1GLT2R2	GLT2R	GLTR	vanR	glycopeptide	VANR	Streptomycetaceae	Streptomycetaceae|vanR	Streptomycetaceae|glycopeptide
sW1GLT2R2	GLT2R	GLTR	mexF	multidrug	MEXF	Rhodanobacteraceae	Rhodanobacteraceae|mexF	Rhodanobacteraceae|multidrug
sW1GLT2R2	GLT2R	GLTR	mexE	multidrug	MEXE	Pseudomonadaceae	Pseudomonadaceae|mexE	Pseudomonadaceae|multidrug
sW1GLT2R2	GLT2R	GLTR	mexF	multidrug	MEXF	Pseudomonadaceae	Pseudomonadaceae|mexF	Pseudomonadaceae|multidrug
sW1GLT2R2	GLT2R	GLTR	adeR	multidrug	ADER	Moraxellaceae	Moraxellaceae|adeR	Moraxellaceae|multidrug
sW1GLT2R2	GLT2R	GLTR	adeS	multidrug	ADES	Moraxellaceae	Moraxellaceae|adeS	Moraxellaceae|multidrug
sW1GLT2R2	GLT2R	GLTR	mdtK	multidrug	MDTK	Moraxellaceae	Moraxellaceae|mdtK	Moraxellaceae|multidrug
sW1GLT2R2	GLT2R	GLTR	bpeF	multidrug	BPEF	Burkholderiaceae	Burkholderiaceae|bpeF	Burkholderiaceae|multidrug
sW1GLT2R2	GLT2R	GLTR	mdtB	multidrug	MDTB	Acetobacteraceae	Acetobacteraceae|mdtB	Acetobacteraceae|multidrug
sW1GLT2R2	GLT2R	GLTR	MuxB	multidrug	MUXB	Burkholderiaceae	Burkholderiaceae|MuxB	Burkholderiaceae|multidrug
sW1GLT2R2	GLT2R	GLTR	mexE	multidrug	MEXE	Burkholderiaceae	Burkholderiaceae|mexE	Burkholderiaceae|multidrug
sW1GLT2R2	GLT2R	GLTR	ADC-23	beta-lactam	ADC-23	Moraxellaceae	Moraxellaceae|ADC-23	Moraxellaceae|beta-lactam
sW1GLT2R2	GLT2R	GLTR	arnA	peptide	ARNA	Pseudomonadaceae	Pseudomonadaceae|arnA	Pseudomonadaceae|peptide
sW1GLT2R2	GLT2R	GLTR	acrB	multidrug	ACRB	Burkholderiaceae	Burkholderiaceae|acrB	Burkholderiaceae|multidrug
sW1GLT2R2	GLT2R	GLTR	amrB	multidrug	AMRB	Burkholderiaceae	Burkholderiaceae|amrB	Burkholderiaceae|multidrug
sW1GLT2R2	GLT2R	GLTR	mexB	multidrug	MEXB	Moraxellaceae	Moraxellaceae|mexB	Moraxellaceae|multidrug
sW1GLT2R2	GLT2R	GLTR	rpoB2	multidrug	RPOB2	Micromonosporaceae	Micromonosporaceae|rpoB2	Micromonosporaceae|multidrug
sW1GLT2R2	GLT2R	GLTR	abeS	multidrug	ABES	Moraxellaceae	Moraxellaceae|abeS	Moraxellaceae|multidrug
sW1GLT2R2	GLT2R	GLTR	bacA	bacitracin	BACA	Phyllobacteriaceae	Phyllobacteriaceae|bacA	Phyllobacteriaceae|bacitracin
sW1GLT2R2	GLT2R	GLTR	oprC	multidrug	OPRC	Burkholderiaceae	Burkholderiaceae|oprC	Burkholderiaceae|multidrug
sW1GLT2R2	GLT2R	GLTR	amrB	multidrug	AMRB	Burkholderiaceae	Burkholderiaceae|amrB	Burkholderiaceae|multidrug
sW1GLT2R2	GLT2R	GLTR	rpoB2	multidrug	RPOB2	Thermomonosporaceae	Thermomonosporaceae|rpoB2	Thermomonosporaceae|multidrug
sW1GLT2R2	GLT2R	GLTR	vanR	glycopeptide	VANR	Streptomycetaceae	Streptomycetaceae|vanR	Streptomycetaceae|glycopeptide
sW1GLT2R2	GLT2R	GLTR	smeE	multidrug	SMEE	Desulfobacteraceae	Desulfobacteraceae|smeE	Desulfobacteraceae|multidrug
sW1GLT2R2	GLT2R	GLTR	mexF	multidrug	MEXF	Pseudomonadaceae	Pseudomonadaceae|mexF	Pseudomonadaceae|multidrug
sW1GLT2R2	GLT2R	GLTR	emrB	multidrug	EMRB	Moraxellaceae	Moraxellaceae|emrB	Moraxellaceae|multidrug
sW1GLT2R2	GLT2R	GLTR	mdtL	multidrug	MDTL	Moraxellaceae	Moraxellaceae|mdtL	Moraxellaceae|multidrug
sW1GLT2R2	GLT2R	GLTR	mexB	multidrug	MEXB	Moraxellaceae	Moraxellaceae|mexB	Moraxellaceae|multidrug
sW1GLT2R2	GLT2R	GLTR	rosA	fosmidomycin	ROSA	Burkholderiaceae	Burkholderiaceae|rosA	Burkholderiaceae|fosmidomycin
sW1GLT2R2	GLT2R	GLTR	mexF	multidrug	MEXF	Xanthomonadaceae	Xanthomonadaceae|mexF	Xanthomonadaceae|multidrug
sW1GLT2R2	GLT2R	GLTR	multidrug_ABC_transporter	multidrug	ABC TRANSPORTER	Moraxellaceae	Moraxellaceae|multidrug_ABC_transporter	Moraxellaceae|multidrug
sW1GLT2R2	GLT2R	GLTR	marR	multidrug	MARR	Moraxellaceae	Moraxellaceae|marR	Moraxellaceae|multidrug
sW1GLT2R2	GLT2R	GLTR	adeC	multidrug	ADEC	Moraxellaceae	Moraxellaceae|adeC	Moraxellaceae|multidrug
sW1GLT2R2	GLT2R	GLTR	adeC	multidrug	ADEC	Moraxellaceae	Moraxellaceae|adeC	Moraxellaceae|multidrug
sW1GLT2R2	GLT2R	GLTR	bpeF	multidrug	BPEF	Burkholderiaceae	Burkholderiaceae|bpeF	Burkholderiaceae|multidrug
sW1GLT2R2	GLT2R	GLTR	ADP-ribosylating_transferase_arr	rifamycin	ARR	Microbacteriaceae	Microbacteriaceae|ADP-ribosylating_transferase_arr	Microbacteriaceae|rifamycin
sW1GLT2R2	GLT2R	GLTR	OpmH	triclosan	OPMH	Pseudomonadaceae	Pseudomonadaceae|OpmH	Pseudomonadaceae|triclosan
sW1GLT2R2	GLT2R	GLTR	bpeF	multidrug	BPEF	Burkholderiaceae	Burkholderiaceae|bpeF	Burkholderiaceae|multidrug
sW1GLT2R2	GLT2R	GLTR	mexW	multidrug	MEXW	Nitrobacteraceae	Nitrobacteraceae|mexW	Nitrobacteraceae|multidrug
sW1GLT2R2	GLT2R	GLTR	adeB	multidrug	ADEB	Moraxellaceae	Moraxellaceae|adeB	Moraxellaceae|multidrug
sW1GLT2R2	GLT2R	GLTR	ANT(3'')-IIa	aminoglycoside	ANT(3'')-IIA	Moraxellaceae	Moraxellaceae|ANT(3'')-IIa	Moraxellaceae|aminoglycoside
sW1GLT2R2	GLT2R	GLTR	mexE	multidrug	MEXE	Burkholderiaceae	Burkholderiaceae|mexE	Burkholderiaceae|multidrug
sW1GLT2R2	GLT2R	GLTR	bpeF	multidrug	BPEF	Burkholderiaceae	Burkholderiaceae|bpeF	Burkholderiaceae|multidrug
sW1GLT2R2	GLT2R	GLTR	MuxB	multidrug	MUXB	Pseudomonadaceae	Pseudomonadaceae|MuxB	Pseudomonadaceae|multidrug
sW1GLT2R2	GLT2R	GLTR	oprM	multidrug	OPRM	Pseudomonadaceae	Pseudomonadaceae|oprM	Pseudomonadaceae|multidrug
sW1GLT2R2	GLT2R	GLTR	mexB	multidrug	MEXB	Pseudomonadaceae	Pseudomonadaceae|mexB	Pseudomonadaceae|multidrug
sW1GLT2R2	GLT2R	GLTR	mexA	multidrug	MEXA	Pseudomonadaceae	Pseudomonadaceae|mexA	Pseudomonadaceae|multidrug
[truncated: 30,657 more rows]
