# Supplementary material for: Temporal Dynamics Dominates Microbiome and Resistome Assembly Despite Tetracycline Pressure in a Germfree Lettuce Model
Source: Research Square preprint supplement (doi:10.21203/rs.3.rs-8401048/v1), 2025-12-24
Supplement: Supplementary file 2 [file dcf3296e3d79a4c1da5c7b6d.xlsx]

## Sheet: DF_Taxa
feature	metadata	value	coef	stderr	N.not.0	pval	qval	sample_type
Rhizobiaceae	Germfree	Germfree	0.736645	0.0486015	96	1.25576e-26	2.18502e-23	Soils
Methylophilaceae	Germfree	Germfree	1.41819	0.0971062	96	1.39009e-25	1.20938e-22	Soils
Pseudomonadaceae	Germfree	Germfree	1.76523	0.0917397	96	9.47464e-23	5.49529e-20	Soils
Ferrimonadaceae	Germfree	Germfree	0.239267	0.0196918	95	9.37424e-21	4.0778e-18	Soils
Kofleriaceae	Germfree	Germfree	-0.593755	0.0388884	96	5.67174e-19	1.97377e-16	Soils
Alcaligenaceae	Germfree	Germfree	1.11007	0.0738518	96	1.00222e-18	2.70932e-16	Soils
Spongiibacteraceae	Germfree	Germfree	0.325482	0.029216	95	1.08996e-18	2.70932e-16	Soils
Desulfobulbaceae	Germfree	Germfree	-0.136967	0.00918062	96	1.31374e-18	2.85739e-16	Soils
Caulobacteraceae	Germfree	Germfree	0.962374	0.0726013	96	8.71422e-17	1.51627e-14	Soils
Hymenobacteraceae	Germfree	Germfree	0.577539	0.043462	96	7.99794e-17	1.51627e-14	Soils
Boseaceae	Germfree	Germfree	0.653913	0.0672829	96	9.87968e-16	1.43255e-13	Soils
Sphingobacteriaceae	Germfree	Germfree	0.911108	0.0737833	96	9.87744e-16	1.43255e-13	Soils
Cellvibrionaceae	Germfree	Germfree	0.229178	0.0187542	95	1.40412e-15	1.87936e-13	Soils
Endozoicomonadaceae	Germfree	Germfree	0.22358	0.0234267	95	2.29647e-15	2.85418e-13	Soils
Saprospiraceae	Germfree	Germfree	0.398319	0.0335084	96	3.53222e-15	4.09738e-13	Soils
Comamonadaceae	Germfree	Germfree	0.585396	0.0493555	96	3.8021e-15	4.13478e-13	Soils
Burkholderiaceae	Germfree	Germfree	1.15922	0.101007	96	1.12323e-14	1.14966e-12	Soils
Moritellaceae	Germfree	Germfree	0.310936	0.0342091	95	2.05432e-14	1.98584e-12	Soils
Muribaculaceae	Germfree	Germfree	0.335522	0.0298679	95	2.2519e-14	2.06226e-12	Soils
Schleiferiaceae	Germfree	Germfree	0.379248	0.0340958	95	3.09704e-14	2.69443e-12	Soils
Moraxellaceae	Weeks	Weeks	-2.05316	0.185198	96	3.4439e-14	2.85351e-12	Soils
Ichthyobacteriaceae	Germfree	Germfree	0.866394	0.078715	95	4.33807e-14	3.43102e-12	Soils
Halomonadaceae	Germfree	Germfree	0.177518	0.016314	96	6.25181e-14	4.72963e-12	Soils
Colwelliaceae	Germfree	Germfree	0.390921	0.0361573	96	7.66477e-14	5.55696e-12	Soils
Reichenbachiellaceae	Germfree	Germfree	0.363768	0.0356555	95	4.68353e-13	3.25974e-11	Soils
Sphingomonadaceae	Germfree	Germfree	0.75105	0.074625	96	7.10339e-13	4.7538e-11	Soils
Oxalobacteraceae	Germfree	Germfree	1.40461	0.140216	96	8.1875e-13	5.27639e-11	Soils
Sphaerotilaceae	Germfree	Germfree	0.562198	0.0571404	96	1.41006e-12	8.76249e-11	Soils
Spirosomaceae	Germfree	Germfree	0.509937	0.0526873	96	2.30512e-12	1.38307e-10	Soils
Miltoncostaeaceae	Germfree	Germfree	-0.34711	0.0368774	95	5.24689e-12	3.0432e-10	Soils
Sinobacteraceae	Germfree	Germfree	0.670138	0.0717995	95	6.71093e-12	3.76678e-10	Soils
Fulvivirgaceae	Germfree	Germfree	0.372694	0.0407318	96	1.19161e-11	6.47936e-10	Soils
Gloeomargaritaceae	Germfree	Germfree	0.291088	0.032045	95	1.46734e-11	7.53782e-10	Soils
Sandaracinaceae	Germfree	Germfree	-0.465066	0.0512045	96	1.47291e-11	7.53782e-10	Soils
Halobacteriovoraceae	Germfree	Germfree	0.349602	0.0453958	95	1.58459e-11	7.8777e-10	Soils
Methylophilaceae	Weeks	Weeks	-0.92136	0.120581	96	2.10691e-11	1.01834e-09	Soils
Alteromonadaceae	Germfree	Germfree	0.243526	0.0273475	96	2.5812e-11	1.21386e-09	Soils
Bruguierivoracaceae	Germfree	Germfree	0.208494	0.0240375	95	5.38443e-11	2.4655e-09	Soils
Pelagibacteraceae	Germfree	Germfree	0.335473	0.0389378	96	6.48408e-11	2.8681e-09	Soils
Shewanellaceae	Germfree	Germfree	0.179691	0.0208692	96	6.59334e-11	2.8681e-09	Soils
Paenibacillaceae	Germfree	Germfree	1.20692	0.140653	96	7.24767e-11	3.07584e-09	Soils
Beijerinckiaceae	Germfree	Germfree	-0.52975	0.0620762	96	8.42541e-11	3.33187e-09	Soils
Pseudoalteromonadaceae	Germfree	Germfree	0.245457	0.0287396	96	8.24269e-11	3.33187e-09	Soils
Syntrophobacteraceae	Germfree	Germfree	-0.328518	0.0384577	95	8.19978e-11	3.33187e-09	Soils
Mariprofundaceae	Germfree	Germfree	-0.211886	0.0289541	96	9.64667e-11	3.73005e-09	Soils
Oceanospirillaceae	Germfree	Germfree	0.218221	0.0302036	96	1.4909e-10	5.6395e-09	Soils
Dermatophilaceae	Germfree	Germfree	-0.166067	0.0231405	95	1.87031e-10	6.92411e-09	Soils
Kribbellaceae	Germfree	Germfree	-0.933194	0.114008	96	2.59435e-10	9.40451e-09	Soils
Piscirickettsiaceae	Germfree	Germfree	0.190394	0.0234104	96	3.07603e-10	1.0923e-08	Soils
Cyclobacteriaceae	Germfree	Germfree	0.291926	0.0361091	96	3.59928e-10	1.25255e-08	Soils
Rickettsiaceae	Germfree	Germfree	0.401106	0.0498268	96	4.02761e-10	1.37413e-08	Soils
Erythrobacteraceae	Germfree	Germfree	0.407058	0.0508852	96	4.74769e-10	1.58865e-08	Soils
Haliscomenobacteraceae	Germfree	Germfree	0.256606	0.0321832	95	5.17239e-10	1.69811e-08	Soils
Desulfohalobiaceae	Germfree	Germfree	-0.211446	0.030494	96	5.77029e-10	1.85932e-08	Soils
Phototrophicaceae	Germfree	Germfree	-0.464899	0.0590346	95	7.13118e-10	2.25605e-08	Soils
Thermotogaceae	Germfree	Germfree	-0.255295	0.0371591	95	7.74422e-10	2.40624e-08	Soils
Geminocystaceae	Germfree	Germfree	0.521571	0.06771	96	1.25375e-09	3.82724e-08	Soils
Thermosynechococcaceae	Germfree	Germfree	-0.219356	0.0326262	95	1.52294e-09	4.56883e-08	Soils
Acidothermaceae	Germfree	Germfree	-0.282333	0.0375855	95	2.35448e-09	6.94372e-08	Soils
Candidatus_Nanosynbacteraceae	Germfree	Germfree	-1.0525	0.140452	95	2.49959e-09	7.01497e-08	Soils
Morganellaceae	Germfree	Germfree	0.335703	0.0447896	96	2.48745e-09	7.01497e-08	Soils
Thermomonosporaceae	Germfree	Germfree	-0.74292	0.0991088	96	2.48013e-09	7.01497e-08	Soils
Candidatus_Deianiraeaceae	Germfree	Germfree	0.689785	0.0925449	93	2.85399e-09	7.88245e-08	Soils
Granulosicoccaceae	Germfree	Germfree	0.166621	0.022508	95	3.37588e-09	9.17818e-08	Soils
Azonexaceae	Germfree	Germfree	0.155096	0.0209962	95	3.55847e-09	9.42775e-08	Soils
Usitatibacteraceae	Germfree	Germfree	-0.279081	0.0377884	96	3.57604e-09	9.42775e-08	Soils
Marivirgaceae	Germfree	Germfree	0.284264	0.038901	96	4.6303e-09	1.2025e-07	Soils
Polyangiaceae	Germfree	Germfree	-0.445124	0.0610915	96	4.96763e-09	1.27113e-07	Soils
Cytophagaceae	Germfree	Germfree	0.698065	0.0966625	96	6.15388e-09	1.55185e-07	Soils
Fimbriimonadaceae	Weeks	Weeks	0.472436	0.0662167	95	8.21681e-09	2.04247e-07	Soils
Acidimicrobiaceae	Germfree	Germfree	-0.277389	0.038958	95	8.62244e-09	2.1131e-07	Soils
Marinobacteraceae	Germfree	Germfree	0.12764	0.0181236	95	1.11588e-08	2.6967e-07	Soils
Vibrionaceae	Germfree	Germfree	0.171707	0.0244183	96	1.15712e-08	2.75806e-07	Soils
Yersiniaceae	Germfree	Germfree	0.184287	0.0264185	96	1.3954e-08	3.28107e-07	Soils
Caldilineaceae	Germfree	Germfree	-0.27058	0.0389925	95	1.57559e-08	3.60727e-07	Soils
Persicobacteraceae	Germfree	Germfree	0.290373	0.0418228	96	1.55647e-08	3.60727e-07	Soils
Conexibacteraceae	Germfree	Germfree	-0.368352	0.053185	95	1.64767e-08	3.7233e-07	Soils
Budviciaceae	Germfree	Germfree	0.146654	0.021416	95	2.13777e-08	4.7085e-07	Soils
Chloroflexaceae	Germfree	Germfree	-0.217918	0.0318075	95	2.1144e-08	4.7085e-07	Soils
Fluviibacteraceae	Weeks	Weeks	-0.220184	0.0360491	95	2.4537e-08	5.33681e-07	Soils
Thiotrichaceae	Germfree	Germfree	0.110576	0.0181444	95	2.60698e-08	5.53189e-07	Soils
Zooshikellaceae	Germfree	Germfree	0.429508	0.0632469	96	2.58532e-08	5.53189e-07	Soils
Labilitrichaceae	Germfree	Germfree	-0.640202	0.0956419	96	3.57875e-08	7.50244e-07	Soils
Bryobacteraceae	Germfree	Germfree	-0.740728	0.111114	96	3.92162e-08	8.12335e-07	Soils
Syntrophotaleaceae	Germfree	Germfree	-0.194862	0.0292961	95	4.12231e-08	8.43862e-07	Soils
Neisseriaceae	Germfree	Germfree	0.153136	0.0231906	96	4.84251e-08	9.79764e-07	Soils
Endozoicomonadaceae	Weeks	Weeks	-0.172702	0.0290899	95	5.22319e-08	1.03277e-06	Soils
Heliobacteriaceae	Germfree	Germfree	-0.163719	0.0275703	95	5.19061e-08	1.03277e-06	Soils
Pectobacteriaceae	Germfree	Germfree	0.132452	0.0201533	95	5.37483e-08	1.05081e-06	Soils
Zoogloeaceae	Germfree	Germfree	0.139309	0.0212187	95	5.49893e-08	1.06313e-06	Soils
Vicinamibacteraceae	Germfree	Germfree	-0.455675	0.0700301	96	6.69056e-08	1.27929e-06	Soils
Xanthobacteraceae	Germfree	Germfree	-0.495019	0.0763128	96	7.15741e-08	1.35368e-06	Soils
Sphingosinicellaceae	Germfree	Germfree	0.365572	0.0568024	96	8.48676e-08	1.58784e-06	Soils
Ardenticatenaceae	Germfree	Germfree	-0.179206	0.0279114	95	8.9338e-08	1.6537e-06	Soils
Tichowtungiaceae	Germfree	Germfree	-0.238416	0.037253	95	9.57353e-08	1.75347e-06	Soils
Thermoanaerobacteraceae	Germfree	Germfree	-0.112816	0.0195231	96	1.04277e-07	1.89002e-06	Soils
Trueperaceae	Germfree	Germfree	-0.222929	0.0350059	95	1.06423e-07	1.90903e-06	Soils
Nitrobacteraceae	Germfree	Germfree	-0.54316	0.0856462	96	1.16278e-07	2.06452e-06	Soils
Microbulbiferaceae	Germfree	Germfree	0.208347	0.0330636	96	1.33178e-07	2.3407e-06	Soils
Francisellaceae	Germfree	Germfree	0.313322	0.0500974	96	1.55981e-07	2.71408e-06	Soils
Opitutaceae	Germfree	Germfree	-0.876448	0.141016	96	1.77762e-07	3.06243e-06	Soils
Thiovulaceae	Weeks	Weeks	-0.160332	0.0260084	96	2.10648e-07	3.59341e-06	Soils
Prevotellaceae	Germfree	Germfree	0.152904	0.0248522	96	2.19359e-07	3.70568e-06	Soils
Roseiflexaceae	Germfree	Germfree	-0.238151	0.0388006	95	2.30426e-07	3.85521e-06	Soils
Simkaniaceae	Germfree	Germfree	0.590502	0.09657	95	2.48948e-07	4.12542e-06	Soils
Nitrospiraceae	Germfree	Germfree	-0.248625	0.0407761	95	2.63934e-07	4.3325e-06	Soils
Halieaceae	Germfree	Germfree	0.0996207	0.0164201	95	2.92151e-07	4.70688e-06	Soils
Iamiaceae	Weeks	Weeks	0.593245	0.0977584	96	2.90703e-07	4.70688e-06	Soils
Candidatus_Saccharimonadaceae	Germfree	Germfree	-0.975225	0.160999	95	3.0176e-07	4.81709e-06	Soils
Bacillales_Family_X._Incertae_Sedis	Germfree	Germfree	-0.257643	0.0427118	95	3.28353e-07	5.19395e-06	Soils
Syntrophaceae	Weeks	Weeks	-0.185558	0.0309334	95	3.6733e-07	5.75814e-06	Soils
Oxalobacteraceae	Weeks	Weeks	-1.04184	0.174112	96	3.86128e-07	5.99878e-06	Soils
Flavobacteriaceae	Germfree	Germfree	0.21733	0.0365359	96	4.34612e-07	6.69226e-06	Soils
Rikenellaceae	Germfree	Germfree	0.181015	0.0304846	95	4.50102e-07	6.86998e-06	Soils
Anaplasmataceae	Germfree	Germfree	0.365226	0.0616841	96	4.76464e-07	7.2091e-06	Soils
Capillimicrobiaceae	Germfree	Germfree	-0.263877	0.0445874	95	4.8084e-07	7.21261e-06	Soils
Dysgonomonadaceae	Weeks	Weeks	-0.29003	0.0491818	95	5.15997e-07	7.67381e-06	Soils
Vulgatibacteraceae	Germfree	Germfree	-0.278245	0.047534	95	5.96812e-07	8.80045e-06	Soils
Rubrobacteraceae	Germfree	Germfree	-0.139722	0.0239517	95	6.38302e-07	9.33315e-06	Soils
Porphyromonadaceae	Germfree	Germfree	0.162632	0.0304264	95	6.6505e-07	9.64323e-06	Soils
Baekduiaceae	Weeks	Weeks	0.56436	0.0976237	95	7.6082e-07	1.09407e-05	Soils
Fimbriimonadaceae	Germfree	Germfree	-0.306995	0.0533256	95	8.24247e-07	1.17557e-05	Soils
Mangrovivirgaceae	Weeks	Weeks	-0.336896	0.0588603	95	9.21344e-07	1.30336e-05	Soils
Sphaerochaetaceae	Germfree	Germfree	-0.247569	0.0433858	95	9.7654e-07	1.37031e-05	Soils
Chlorobiaceae	Germfree	Germfree	-0.126918	0.0222612	95	9.92758e-07	1.37095e-05	Soils
Metamycoplasmataceae	Germfree	Germfree	0.424427	0.0744258	96	9.88172e-07	1.37095e-05	Soils
Marivirgaceae	Weeks	Weeks	-0.274608	0.048305	96	1.04865e-06	1.43673e-05	Soils
Leptospiraceae	Germfree	Germfree	0.4741	0.0834906	96	1.07128e-06	1.45628e-05	Soils
Desulfosudaceae	Germfree	Germfree	-0.183868	0.0325185	95	1.16142e-06	1.56657e-05	Soils
Erwiniaceae	Germfree	Germfree	0.226371	0.0435844	96	1.24978e-06	1.67278e-05	Soils
Anaerolineaceae	Germfree	Germfree	-0.197803	0.035175	95	1.28738e-06	1.70995e-05	Soils
Paraconexibacteraceae	Germfree	Germfree	-0.314226	0.0565685	95	1.61785e-06	2.13262e-05	Soils
Tannerellaceae	Germfree	Germfree	0.200427	0.0362617	96	1.77329e-06	2.31995e-05	Soils
Shewanellaceae	Weeks	Weeks	-0.14293	0.0259141	96	1.84368e-06	2.39404e-05	Soils
Koleobacteraceae	Germfree	Germfree	-0.291438	0.0530965	95	2.01477e-06	2.58125e-05	Soils
Streptomycetaceae	Germfree	Germfree	-0.252103	0.0496498	96	2.01753e-06	2.58125e-05	Soils
Salinisphaeraceae	Germfree	Germfree	0.116112	0.0211859	95	2.07059e-06	2.6298e-05	Soils
Desulfobacteraceae	Germfree	Germfree	-0.114847	0.0210131	96	2.17742e-06	2.74545e-05	Soils
Gloeobacteraceae	Germfree	Germfree	-0.159692	0.0292338	96	2.19857e-06	2.75216e-05	Soils
Acidithiobacillaceae	Germfree	Germfree	-0.126721	0.0232899	96	2.36155e-06	2.93507e-05	Soils
Tepidisphaeraceae	Weeks	Weeks	0.51753	0.0961932	95	2.89082e-06	3.56739e-05	Soils
Lawsonellaceae	Germfree	Germfree	-0.187189	0.0348448	95	2.96884e-06	3.62856e-05	Soils
Persicobacteraceae	Weeks	Weeks	-0.278919	0.0519332	96	2.98209e-06	3.62856e-05	Soils
Puniceicoccaceae	Germfree	Germfree	-0.425007	0.0793002	95	3.09556e-06	3.74047e-05	Soils
Arcobacteraceae	Germfree	Germfree	0.37163	0.0694479	96	3.18148e-06	3.81778e-05	Soils
Desulfuromonadaceae	Germfree	Germfree	-0.162287	0.0304037	95	3.3267e-06	3.9647e-05	Soils
Chrysiogenaceae	Germfree	Germfree	-0.257711	0.0483626	95	3.42729e-06	4.05679e-05	Soils
Staphylococcaceae	Germfree	Germfree	0.312284	0.0586455	96	3.47075e-06	4.08047e-05	Soils
Paraconexibacteraceae	Weeks	Weeks	0.373464	0.0702436	95	3.56672e-06	4.16516e-05	Soils
Nitrosomonadaceae	Germfree	Germfree	-0.4159	0.0783082	96	3.63374e-06	4.21514e-05	Soils
Silvanigrellaceae	Germfree	Germfree	0.25914	0.0488155	96	3.66401e-06	4.22211e-05	Soils
Microbacteriaceae	Germfree	Germfree	0.239118	0.045215	96	3.91586e-06	4.48263e-05	Soils
Caedimonadaceae	Germfree	Germfree	0.327214	0.0622591	94	4.36431e-06	4.96333e-05	Soils
Jatrophihabitantaceae	Germfree	Germfree	-0.276937	0.0530585	95	4.91889e-06	5.5577e-05	Soils
Bradymonadaceae	Germfree	Germfree	-0.194054	0.0372881	95	5.17333e-06	5.80748e-05	Soils
Egibacteraceae	Germfree	Germfree	-0.13904	0.026767	95	5.34179e-06	5.95816e-05	Soils
Ktedonosporobacteraceae	Germfree	Germfree	-0.541652	0.104344	95	5.40295e-06	5.98798e-05	Soils
Phycisphaeraceae	Weeks	Weeks	0.252903	0.0489624	96	5.88184e-06	6.47747e-05	Soils
Planococcaceae	Germfree	Germfree	0.174217	0.0340478	96	6.89791e-06	7.54865e-05	Soils
Paenibacillaceae	Weeks	Weeks	-0.891615	0.174655	96	7.17156e-06	7.79907e-05	Soils
Candidatus_Brocadiaceae	Germfree	Germfree	-0.208207	0.040891	95	7.49085e-06	8.0957e-05	Soils
Sphaerobacteraceae	Germfree	Germfree	-0.155481	0.0305495	95	7.54724e-06	8.1063e-05	Soils
Kosmotogaceae	Germfree	Germfree	0.176806	0.0347597	95	7.62128e-06	8.1356e-05	Soils
Kiritimatiellaceae	Germfree	Germfree	-0.317608	0.0626125	95	7.97789e-06	8.46434e-05	Soils
Christensenellaceae	Germfree	Germfree	-0.122789	0.0243414	95	8.75021e-06	9.2275e-05	Soils
Anaerohalosphaeraceae	Weeks	Weeks	-0.243089	0.0482582	95	8.95922e-06	9.39099e-05	Soils
Oscillatoriaceae	Germfree	Germfree	-0.237152	0.0504565	96	9.19814e-06	9.58369e-05	Soils
Acholeplasmataceae	Germfree	Germfree	0.543873	0.10838	96	9.53594e-06	9.87651e-05	Soils
Nautiliaceae	Germfree	Germfree	0.208866	0.0445864	95	9.78108e-06	0.000100705	Soils
Pseudomonadaceae	Weeks	Weeks	-0.570527	0.113917	96	9.85235e-06	0.000100842	Soils
Other	Germfree	Germfree	0.114164	0.0229742	96	1.1195e-05	0.000113914	Soils
Chroococcidiopsidaceae	Germfree	Germfree	-0.293363	0.0595317	96	1.28164e-05	0.000129654	Soils
Beutenbergiaceae	Germfree	Germfree	-0.125824	0.0255651	95	1.30758e-05	0.000131514	Soils
Chitinophagaceae	Weeks	Weeks	-0.395948	0.0808666	96	1.42054e-05	0.000142054	Soils
Mangrovivirgaceae	Germfree	Germfree	0.231912	0.0474013	95	1.43821e-05	0.000142894	Soils
Parachlamydiaceae	Germfree	Germfree	0.640223	0.130898	95	1.44536e-05	0.000142894	Soils
Pseudoalteromonadaceae	Weeks	Weeks	-0.173446	0.0356873	96	1.59807e-05	0.000157099	Soils
Anaeromyxobacteraceae	Germfree	Germfree	-0.316814	0.0656384	96	1.78221e-05	0.000174216	Soils
Alicyclobacillaceae	Germfree	Germfree	-0.0784897	0.0162756	96	1.80615e-05	0.00017557	Soils
Dermacoccaceae	Germfree	Germfree	-0.0777602	0.0161328	96	1.82115e-05	0.000176045	Soils
Gemmataceae	Weeks	Weeks	0.348059	0.0770887	96	1.89147e-05	0.000181832	Soils
Desulfocapsaceae	Germfree	Germfree	-0.12769	0.0265918	95	1.93177e-05	0.000184686	Soils
Blastochloridaceae	Germfree	Germfree	-0.284132	0.0592584	96	1.97645e-05	0.000187756	Soils
Listeriaceae	Germfree	Germfree	-0.413324	0.0862277	96	1.98546e-05	0.000187756	Soils
Methylocystaceae	Germfree	Germfree	-0.266409	0.0556673	96	2.03543e-05	0.00019144	Soils
Candidatus_Babeliaceae	Germfree	Germfree	0.44846	0.0939116	95	2.10523e-05	0.000196941	Soils
Magnetococcaceae	Weeks	Weeks	-0.161008	0.033806	95	2.19319e-05	0.000204072	Soils
Gemmatimonadaceae	Germfree	Germfree	-0.305329	0.0642191	96	2.25249e-05	0.000208475	Soils
Candidatus_Brocadiaceae	Weeks	Weeks	-0.240489	0.0507761	95	2.3893e-05	0.000219967	Soils
Cellvibrionaceae	Weeks	Weeks	-0.109951	0.0232879	95	2.50724e-05	0.000229611	Soils
Candidatus_Babeliaceae	Weeks	Weeks	0.546873	0.116614	95	2.77835e-05	0.000253106	Soils
Zhaonellaceae	Germfree	Germfree	-0.253419	0.0540826	94	2.81271e-05	0.000254902	Soils
Turicibacteraceae	Germfree	Germfree	0.310802	0.0664621	93	2.89937e-05	0.000261394	Soils
Prolixibacteraceae	Weeks	Weeks	-0.291504	0.0624841	96	3.00544e-05	0.00026956	Soils
Odoribacteraceae	Weeks	Weeks	-0.224424	0.0482052	95	3.10039e-05	0.000276651	Soils
Bacteroidaceae	Weeks	Weeks	-0.181911	0.0391899	96	3.24135e-05	0.000287753	Soils
Magnetococcaceae	Germfree	Germfree	0.12515	0.0272246	95	3.74424e-05	0.00033071	Soils
Sterolibacteriaceae	Germfree	Germfree	0.0952681	0.0209872	95	4.50382e-05	0.00039579	Soils
Flammeovirgaceae	Germfree	Germfree	0.262718	0.0579304	96	4.56592e-05	0.000399231	Soils
Alcanivoracaceae	Germfree	Germfree	0.177903	0.0392492	96	4.60117e-05	0.000400302	Soils
Spiroplasmataceae	Germfree	Germfree	0.510665	0.11304	96	4.82843e-05	0.000417983	Soils
Flavobacteriaceae	Weeks	Weeks	-0.204703	0.0453683	96	4.91479e-05	0.000423353	Soils
Entomoplasmataceae	Germfree	Germfree	0.569613	0.126371	89	4.98707e-05	0.000427463	Soils
Bacteroidaceae	Germfree	Germfree	0.141605	0.0315604	96	5.32713e-05	0.000454373	Soils
Holosporaceae	Germfree	Germfree	0.220362	0.0492305	95	5.51155e-05	0.00046781	Soils
Methylobacteriaceae	Weeks	Weeks	0.131437	0.0295056	96	5.90227e-05	0.000498541	Soils
Symbiobacteriaceae	Germfree	Germfree	-0.10125	0.0227602	95	6.01763e-05	0.00050583	Soils
Tepidiformaceae	Germfree	Germfree	-0.205528	0.0463497	95	6.29669e-05	0.000526743	Soils
Chromobacteriaceae	Germfree	Germfree	0.23979	0.0542695	96	6.62081e-05	0.000551206	Soils
Sulfuricellaceae	Weeks	Weeks	-0.123439	0.0279942	95	6.8144e-05	0.000564622	Soils
Devosiaceae	Germfree	Germfree	0.345585	0.0784094	96	6.8574e-05	0.000565492	Soils
Aerococcaceae	Germfree	Germfree	0.165762	0.0376238	96	6.89405e-05	0.000565832	Soils
Candidatus_Paracaedibacteraceae	Germfree	Germfree	0.320309	0.073093	94	7.42853e-05	0.000606838	Soils
Ichthyobacteriaceae	Weeks	Weeks	-0.427401	0.0977439	95	7.65683e-05	0.000619669	Soils
Phyllobacteriaceae	Germfree	Germfree	-0.299459	0.0684695	96	7.63373e-05	0.000619669	Soils
Haliscomenobacteraceae	Weeks	Weeks	-0.174232	0.0399632	95	7.9748e-05	0.000642414	Soils
Weeksellaceae	Germfree	Germfree	0.419835	0.096369	96	8.0576e-05	0.000646093	Soils
Borreliaceae	Germfree	Germfree	0.345388	0.0794248	96	8.26182e-05	0.00065943	Soils
Coxiellaceae	Weeks	Weeks	0.241238	0.055838	96	9.03425e-05	0.00071779	Soils
Tissierellaceae	Germfree	Germfree	0.293381	0.068245	96	9.66388e-05	0.000764325	Soils
Schleiferiaceae	Weeks	Weeks	-0.181218	0.0423383	95	0.000102498	0.000806999	Soils
Vallitaleaceae	Weeks	Weeks	-0.288218	0.0674827	96	0.000105527	0.000827104	Soils
Desulfomicrobiaceae	Germfree	Germfree	-0.129238	0.0304274	95	0.000113631	0.00088663	Soils
Hapalosiphonaceae	Germfree	Germfree	-0.280541	0.0663677	96	0.000121119	0.000940836	Soils
Demequinaceae	Germfree	Germfree	-0.187198	0.0443108	95	0.000122032	0.000943715	Soils
Actinopolymorphaceae	Germfree	Germfree	-0.105103	0.0248905	96	0.000122822	0.000944587	Soils
Mycoplasmataceae	Germfree	Germfree	0.3539	0.0838318	96	0.000123231	0.000944587	Soils
Marinifilaceae	Weeks	Weeks	-0.348962	0.0830531	96	0.00013114	0.0010008	Soils
Clostridiales_Family_XVII._Incertae_Sedis	Germfree	Germfree	-0.096196	0.0229669	95	0.000136669	0.00103393	Soils
Moraxellaceae	Germfree	Germfree	-0.624813	0.149143	96	0.000136286	0.00103393	Soils
Selenomonadaceae	Germfree	Germfree	-0.101904	0.0245741	95	0.000155621	0.00117221	Soils
Stellaceae	Weeks	Weeks	0.237069	0.0575418	96	0.000169175	0.00126881	Soils
Hyphomonadaceae	Weeks	Weeks	0.20124	0.0488726	95	0.000170388	0.00127242	Soils
Dehalococcoidaceae	Germfree	Germfree	-0.236128	0.0575449	96	0.000178107	0.00132439	Soils
Capillimicrobiaceae	Weeks	Weeks	0.225462	0.0553661	95	0.000196159	0.00145241	Soils
Devosiaceae	Weeks	Weeks	0.394148	0.0973643	96	0.000211283	0.00155776	Soils
Eubacteriales_Family_XIII._Incertae_Sedis	Weeks	Weeks	-0.185642	0.0458744	96	0.000212216	0.00155804	Soils
Cyclobacteriaceae	Weeks	Weeks	-0.181372	0.0448382	96	0.000213347	0.00155976	Soils
Bacteriovoracaceae	Germfree	Germfree	0.279686	0.0691862	96	0.000215002	0.00156529	Soils
Cellulomonadaceae	Germfree	Germfree	-0.174016	0.0430644	95	0.000216127	0.00156692	Soils
Nitrobacteraceae	Weeks	Weeks	0.428286	0.106351	96	0.000225463	0.00162782	Soils
Thermodesulfobacteriaceae	Germfree	Germfree	-0.136123	0.0338548	96	0.000229898	0.00165299	Soils
Kaistiaceae	Weeks	Weeks	0.369456	0.0931293	96	0.000271098	0.0019412	Soils
Phycisphaeraceae	Germfree	Germfree	-0.156342	0.0394303	96	0.000272854	0.00194576	Soils
Microvenatoraceae	Germfree	Germfree	-0.159457	0.0403178	95	0.00028135	0.00199816	Soils
Gomontiellaceae	Germfree	Germfree	-0.235135	0.0623552	96	0.000288928	0.00204364	Soils
Prochlorotrichaceae	Weeks	Weeks	0.207809	0.0551564	95	0.000292219	0.00205855	Soils
Thalassobaculaceae	Weeks	Weeks	0.219512	0.0558297	95	0.000302035	0.00211911	Soils
Verrucomicrobiaceae	Weeks	Weeks	0.329941	0.0842693	96	0.000317624	0.00221954	Soils
Thiotrichaceae	Weeks	Weeks	-0.0840547	0.0225307	95	0.000331952	0.00231039	Soils
Kaistiaceae	Germfree	Germfree	0.292347	0.0749988	96	0.000334816	0.00232103	Soils
Tannerellaceae	Weeks	Weeks	-0.174938	0.0450278	96	0.000348218	0.00240436	Soils
Melioribacteraceae	Germfree	Germfree	-0.278824	0.0719123	95	0.00035661	0.00245257	Soils
Leptolyngbyaceae	Germfree	Germfree	-0.103499	0.0267372	96	0.000363508	0.00249017	Soils
Clostridiaceae	Germfree	Germfree	0.294733	0.0768234	96	0.000403554	0.00275366	Soils
Desulfobulbaceae	Weeks	Weeks	-0.0436056	0.0114	96	0.000417755	0.00283943	Soils
Reichenbachiellaceae	Weeks	Weeks	-0.169273	0.0442749	95	0.000420092	0.0028442	Soils
Hydrogenimonaceae	Germfree	Germfree	-0.278121	0.0734686	95	0.000470593	0.00317377	Soils
Neisseriaceae	Weeks	Weeks	-0.106677	0.0287968	96	0.000600053	0.00403125	Soils
Lichenihabitantaceae	Germfree	Germfree	-0.156426	0.0424025	95	0.000628264	0.00420454	Soils
Thermoactinomycetaceae	Weeks	Weeks	-0.124764	0.0338434	96	0.000633075	0.0042205	Soils
Archangiaceae	Germfree	Germfree	0.580893	0.158208	96	0.000661614	0.00438503	Soils
Spongiibacteraceae	Weeks	Weeks	-0.127921	0.0362787	95	0.000662795	0.00438503	Soils
Brachyspiraceae	Germfree	Germfree	0.349194	0.095573	96	0.000697965	0.00458286	Soils
Brucellaceae	Germfree	Germfree	0.252334	0.0690517	95	0.000696757	0.00458286	Soils
Nannocystaceae	Germfree	Germfree	-0.166084	0.0455514	96	0.000713912	0.00466995	Soils
Leptotrichiaceae	Germfree	Germfree	0.225801	0.0620321	96	0.000726728	0.00473598	Soils
Candidatus_Chromulinivoraceae	Weeks	Weeks	0.622659	0.171468	92	0.000745745	0.00484178	Soils
Endomicrobiaceae	Germfree	Germfree	-0.165422	0.0456561	95	0.0007639	0.00494121	Soils
Desulfitobacteriaceae	Weeks	Weeks	-0.151863	0.0422956	95	0.000841268	0.0054215	Soils
Segniliparaceae	Germfree	Germfree	-0.113373	0.0316009	95	0.000848404	0.00544731	Soils
Selenomonadaceae	Weeks	Weeks	-0.108908	0.0305148	95	0.000896195	0.00573301	Soils
Myxococcaceae	Germfree	Germfree	0.478281	0.134159	96	0.000906773	0.00577943	Soils
Opitutaceae	Weeks	Weeks	0.622182	0.175105	96	0.000938809	0.00596178	Soils
Phyllobacteriaceae	Weeks	Weeks	0.301522	0.0850216	96	0.00095763	0.00605919	Soils
Eubacteriaceae	Weeks	Weeks	-0.160933	0.0455752	96	0.00100137	0.00631296	Soils
Aerococcaceae	Weeks	Weeks	0.163741	0.0467192	96	0.00108153	0.0067937	Soils
Lacipirellulaceae	Germfree	Germfree	-0.167981	0.0481673	95	0.0011375	0.00711958	Soils
Alicyclobacillaceae	Weeks	Weeks	-0.0703174	0.0202101	96	0.0011647	0.00723779	Soils
Sporomusaceae	Germfree	Germfree	0.084229	0.0242074	96	0.00116417	0.00723779	Soils
Hyphomicrobiaceae	Weeks	Weeks	0.319627	0.0921913	96	0.00120713	0.00747476	Soils
Chloroherpetonaceae	Weeks	Weeks	-0.167686	0.0484518	95	0.00122868	0.00758124	Soils
Bernardetiaceae	Weeks	Weeks	-0.236107	0.068355	96	0.00125297	0.0077038	Soils
Spirochaetaceae	Germfree	Germfree	-0.171873	0.0497998	96	0.00126341	0.00774062	Soils
Candidatus_Nanopelagicaceae	Germfree	Germfree	0.115871	0.0340541	95	0.0014541	0.00882325	Soils
Paludibacteraceae	Weeks	Weeks	-0.227682	0.0668918	95	0.00144919	0.00882325	Soils
Sphingobacteriaceae	Weeks	Weeks	-0.311715	0.09162	96	0.00145533	0.00882325	Soils
Jonesiaceae	Germfree	Germfree	-0.186194	0.0547483	96	0.00146099	0.00882682	Soils
Legionellaceae	TET_density	TET_density	2.75389	0.81081	96	0.00147978	0.00890939	Soils
Elioraeaceae	Weeks	Weeks	0.187189	0.0553648	95	0.00154694	0.00928165	Soils
Sporichthyaceae	Germfree	Germfree	-0.11503	0.0340463	95	0.00155751	0.00931293	Soils
Bartonellaceae	Germfree	Germfree	0.0792001	0.0234515	96	0.00156397	0.00931953	Soils
Conexibacteraceae	Weeks	Weeks	0.221688	0.0660421	95	0.0016581	0.00984672	Soils
Celerinatantimonadaceae	Germfree	Germfree	0.139237	0.0415706	95	0.00169339	0.0100221	Soils
Desulfallaceae	Germfree	Germfree	0.145072	0.0436166	95	0.00180984	0.0106389	Soils
Legionellaceae	TET_density_Weeks	TET_density_Weeks	-2.75776	0.828946	96	0.00180597	0.0106389	Soils
Thioalkalispiraceae	Weeks	Weeks	0.105307	0.0316726	95	0.00181606	0.0106396	Soils
Kangiellaceae	Germfree	Germfree	0.193739	0.0587789	96	0.00197088	0.0115078	Soils
Rhizobiaceae	Weeks	Weeks	0.191461	0.0603506	96	0.00206132	0.0119956	Soils
Fusobacteriaceae	Germfree	Germfree	0.208851	0.0636936	96	0.00206849	0.0119972	Soils
Desulfovibrionaceae	Germfree	Germfree	-0.0680788	0.0207948	95	0.00209886	0.0121329	Soils
Tepidanaerobacteraceae	Germfree	Germfree	0.111985	0.0343207	95	0.00216462	0.0124716	Soils
Archangiaceae	Weeks	Weeks	0.640461	0.196454	96	0.00218182	0.012488	Soils
Colwelliaceae	Weeks	Weeks	-0.146421	0.0448981	96	0.00217522	0.012488	Soils
Azonexaceae	Weeks	Weeks	-0.0849491	0.0260719	95	0.00219317	0.0125119	Soils
Desulfocapsaceae	Weeks	Weeks	-0.107195	0.0330202	95	0.0022681	0.0128133	Soils
Marinilabiliaceae	Weeks	Weeks	-0.262394	0.0808177	95	0.00226551	0.0128133	Soils
Rhodospirillaceae	Weeks	Weeks	0.255297	0.0786042	96	0.00225827	0.0128133	Soils
Weeksellaceae	Weeks	Weeks	-0.388214	0.119666	96	0.00228205	0.0128504	Soils
Pleomorphomonadaceae	Weeks	Weeks	0.197271	0.0608885	96	0.00230975	0.0129644	Soils
Tenuifilaceae	Germfree	Germfree	-0.237666	0.0741195	95	0.00253616	0.0141894	Soils
Planococcaceae	Weeks	Weeks	-0.135333	0.0422787	96	0.00257588	0.0143655	Soils
Coriobacteriaceae	Germfree	Germfree	-0.0914936	0.0287577	95	0.00271946	0.0151178	Soils
Marinobacteraceae	Weeks	Weeks	-0.0713756	0.0225048	95	0.00279602	0.0154939	Soils
Planctomycetaceae	Weeks	Weeks	0.24427	0.0773291	96	0.00289677	0.0160012	Soils
Rickettsiaceae	Weeks	Weeks	-0.194909	0.0618722	96	0.0029671	0.0163378	Soils
Hydrogenophilaceae	Germfree	Germfree	-0.116772	0.0371098	95	0.00299609	0.0164454	Soils
Treponemataceae	Weeks	Weeks	-0.109377	0.0348106	96	0.00303468	0.0166049	Soils
Xanthomonadaceae	Germfree	Germfree	-0.130983	0.0430209	96	0.0030463	0.0166162	Soils
Lawsonellaceae	Weeks	Weeks	0.135788	0.0432684	95	0.00306678	0.0166756	Soils
Breoghaniaceae	Weeks	Weeks	0.170631	0.0547396	95	0.00325126	0.0176237	Soils
Candidatus_Chromulinivoraceae	Germfree	Germfree	0.429901	0.138086	92	0.00328608	0.0177571	Soils
Psychromonadaceae	Weeks	Weeks	-0.143354	0.0460823	95	0.00330835	0.0178221	Soils
Streptococcaceae	Germfree	Germfree	0.141101	0.0454447	96	0.00336286	0.0180598	Soils
Rhabdochlamydiaceae	Germfree	Germfree	0.539343	0.174494	89	0.0034949	0.0187112	Soils
Burkholderiaceae	Weeks	Weeks	-0.386967	0.125425	96	0.0035495	0.0189452	Soils
Tepidiformaceae	Weeks	Weeks	0.177499	0.0575544	95	0.00356148	0.018951	Soils
Miltoncostaeaceae	Weeks	Weeks	0.141078	0.0457923	95	0.00359297	0.0190603	Soils
Coxiellaceae	TET_density	TET_density	1.39758	0.454116	96	0.00362496	0.0190668	Soils
Lacipirellulaceae	Weeks	Weeks	0.184097	0.0598115	95	0.00362124	0.0190668	Soils
Melioribacteraceae	Weeks	Weeks	-0.274799	0.0892966	95	0.00362707	0.0190668	Soils
Idiomarinaceae	Weeks	Weeks	-0.11494	0.0374489	96	0.00370861	0.0194367	Soils
Parvibaculaceae	Weeks	Weeks	0.267221	0.0871005	96	0.00372177	0.0194471	Soils
Orbaceae	Germfree	Germfree	0.157819	0.051649	96	0.00384965	0.0200551	Soils
Amoebophilaceae	Germfree	Germfree	0.237604	0.0779125	95	0.00391316	0.0203251	Soils
Thalassospiraceae	Weeks	Weeks	0.121083	0.0397347	95	0.00393825	0.0203945	Soils
Coxiellaceae	TET_density_Weeks	TET_density_Weeks	-1.41352	0.464273	96	0.00396732	0.0204235	Soils
Legionellaceae	Weeks	Weeks	0.303573	0.0996971	96	0.00396339	0.0204235	Soils
Vallitaleaceae	Germfree	Germfree	0.16451	0.0543451	96	0.00416042	0.0213544	Soils
Marinilabiliaceae	Germfree	Germfree	-0.196889	0.065084	95	0.00418299	0.0214071	Soils
Fervidobacteriaceae	Germfree	Germfree	0.127037	0.0420194	95	0.00420402	0.0214516	Soils
Kiloniellaceae	Weeks	Weeks	0.129684	0.0429529	95	0.0042511	0.0216284	Soils
Atopobiaceae	Germfree	Germfree	-0.0842301	0.027935	95	0.00429734	0.0217999	Soils
Kordiimonadaceae	Germfree	Germfree	0.0801552	0.0267133	95	0.00447138	0.0226169	Soils
Egicoccaceae	Germfree	Germfree	-0.0844579	0.0282102	95	0.00455309	0.0229634	Soils
Lichenihabitantaceae	Weeks	Weeks	0.156868	0.052653	95	0.00473634	0.0238186	Soils
Akkermansiaceae	Weeks	Weeks	0.161358	0.0543361	95	0.0048611	0.0243756	Soils
Campylobacteraceae	Germfree	Germfree	0.171163	0.057678	96	0.00488811	0.0244406	Soils
Usitatibacteraceae	Weeks	Weeks	0.138928	0.0469236	96	0.00497889	0.0248231	Soils
Myxococcaceae	Weeks	Weeks	0.493003	0.166591	96	0.00499734	0.0248439	Soils
Gordoniaceae	Germfree	Germfree	-0.0576524	0.0195099	95	0.00505582	0.025063	Soils
Barnesiellaceae	Weeks	Weeks	-0.127185	0.0445069	96	0.00528942	0.0261465	Soils
Syntrophomonadaceae	Weeks	Weeks	-0.136224	0.046406	95	0.00532806	0.0262629	Soils
Fulvivirgaceae	Weeks	Weeks	-0.148413	0.0505784	96	0.00534444	0.0262693	Soils
Sulfurovaceae	Germfree	Germfree	-0.065842	0.023144	95	0.00548774	0.0268976	Soils
Hahellaceae	Germfree	Germfree	0.0606621	0.0207949	95	0.00559524	0.0273475	Soils
Beijerinckiaceae	Weeks	Weeks	0.224229	0.0770827	96	0.00571941	0.0278761	Soils
Halanaerobiaceae	Weeks	Weeks	-0.190183	0.0654583	96	0.00577335	0.0280604	Soils
Fervidobacteriaceae	Weeks	Weeks	-0.151204	0.0521773	95	0.00589005	0.0284686	Soils
Pseudomonadaceae	TET_density	TET_density	2.68525	0.926458	96	0.00588215	0.0284686	Soils
Tenuifilaceae	Weeks	Weeks	-0.266579	0.0920374	95	0.0059132	0.0285013	Soils
Moritellaceae	Weeks	Weeks	-0.119441	0.0424789	95	0.00603409	0.0290036	Soils
Amorphaceae	Weeks	Weeks	0.146372	0.0507402	96	0.00609968	0.0292381	Soils
Aeromonadaceae	Germfree	Germfree	0.117195	0.0407514	96	0.00624488	0.0298519	Soils
Gallionellaceae	Weeks	Weeks	-0.120581	0.041997	95	0.00632275	0.0301413	Soils
Flammeovirgaceae	Weeks	Weeks	-0.205981	0.0719347	96	0.00645338	0.03068	Soils
Mycobacteriaceae	Germfree	Germfree	-0.146803	0.0516818	96	0.00685583	0.0325045	Soils
Prevotellaceae	Weeks	Weeks	-0.0875473	0.0308601	96	0.0069211	0.0327247	Soils
Pseudanabaenaceae	Germfree	Germfree	-0.187461	0.0662468	96	0.00705271	0.0332567	Soils
Propionibacteriaceae	Germfree	Germfree	-0.0563953	0.020102	95	0.00751612	0.0352128	Soils
Steroidobacteraceae	Weeks	Weeks	0.221994	0.0791468	95	0.00752826	0.0352128	Soils
Thermodesulfobacteriaceae	Weeks	Weeks	0.117923	0.042039	96	0.00752323	0.0352128	Soils
Saprospiraceae	Weeks	Weeks	-0.116473	0.0416088	96	0.00763956	0.0356376	Soils
Frankiaceae	Germfree	Germfree	-0.0543396	0.019442	96	0.00772528	0.0359411	Soils
Carnobacteriaceae	Weeks	Weeks	-0.189247	0.0681316	96	0.00808111	0.0374963	Soils
Pseudomonadaceae	TET_density_Weeks	TET_density_Weeks	-2.62801	0.947181	96	0.00814664	0.0375999	Soils
Saccharospirillaceae	Germfree	Germfree	0.0566754	0.020426	95	0.00814453	0.0375999	Soils
Actinomycetaceae	Germfree	Germfree	-0.033572	0.0121142	96	0.00821626	0.0376268	Soils
Caulobacteraceae	Weeks	Weeks	0.249833	0.0901522	96	0.00821734	0.0376268	Soils
Sporomusaceae	Weeks	Weeks	-0.0833212	0.0300594	96	0.00820342	0.0376268	Soils
Vibrionaceae	Weeks	Weeks	-0.0838162	0.0303213	96	0.00836742	0.0382134	Soils
Chroococcaceae	Germfree	Germfree	0.243146	0.0891784	96	0.00922516	0.0420204	Soils
Treponemataceae	Germfree	Germfree	-0.0762756	0.0280337	96	0.00936048	0.0425254	Soils
Sanguibacteraceae	Germfree	Germfree	-0.078322	0.0288275	95	0.00945575	0.0428464	Soils
Chelatococcaceae	Weeks	Weeks	0.122695	0.0453319	95	0.00970971	0.0438828	Soils
Caedimonadaceae	Weeks	Weeks	0.20749	0.0773098	94	0.0102913	0.0463908	Soils
Nakamurellaceae	Germfree	Germfree	-0.0591447	0.0220696	95	0.0103957	0.04662	Soils
Peptococcaceae	Weeks	Weeks	-0.0925415	0.0345284	96	0.0103893	0.04662	Soils
Zymomonadaceae	Weeks	Weeks	0.158919	0.0597484	95	0.0109419	0.0489432	Soils
Lachnospiraceae	Weeks	Weeks	-0.138227	0.0523084	96	0.011432	0.0510045	Soils
Thermoguttaceae	Weeks	Weeks	0.122489	0.0464228	95	0.0115476	0.0513885	Soils
Odoribacteraceae	TET_density	TET_density	1.03095	0.39204	95	0.0118088	0.0524167	Soils
Parvicellaceae	TET_density	TET_density	1.28094	0.488733	95	0.0120729	0.0533167	Soils
Spirosomaceae	Weeks	Weeks	-0.171537	0.0654242	96	0.0120431	0.0533167	Soils
Ilumatobacteraceae	Weeks	Weeks	0.139551	0.0533685	95	0.0122593	0.0539406	Soils
Peptoniphilaceae	Germfree	Germfree	0.100016	0.0382571	96	0.0122761	0.0539406	Soils
Brucellaceae	Weeks	Weeks	0.224001	0.0857445	95	0.012335	0.0540627	Soils
Intrasporangiaceae	Germfree	Germfree	-0.063855	0.0244728	95	0.0124347	0.0542263	Soils
Schleiferiaceae	TET_density	TET_density	0.898505	0.344326	95	0.0124271	0.0542263	Soils
Erwiniaceae	Weeks	Weeks	-0.137934	0.0541207	96	0.0124895	0.0543295	Soils
Prevotellaceae	TET_density	TET_density	0.653643	0.250977	96	0.0125864	0.0545887	Soils
Syntrophomonadaceae	Germfree	Germfree	0.0973005	0.0373717	95	0.0126119	0.0545887	Soils
Clostridiales_Family_XVI._Incertae_Sedis	Germfree	Germfree	0.10284	0.0397407	95	0.0131217	0.0566545	Soils
Legionellaceae	Germfree	Germfree	0.206935	0.080288	96	0.0134668	0.0580005	Soils
Nitrosomonadaceae	Weeks	Weeks	-0.250354	0.0972387	96	0.0135605	0.0582598	Soils
Barnesiellaceae	TET_density	TET_density	0.909849	0.361962	96	0.0137072	0.058745	Soils
Ignavibacteriaceae	Germfree	Germfree	-0.160144	0.0625394	96	0.0140398	0.0600228	Soils
Candidatus_Babeliaceae	TET_density	TET_density	2.4238	0.948392	95	0.0142153	0.0606242	Soils
Sulfurospirillaceae	Weeks	Weeks	-0.175923	0.0689685	95	0.0143902	0.06122	Soils
Dermabacteraceae	Germfree	Germfree	-0.0523586	0.020645	95	0.014922	0.0633275	Soils
Atopobiaceae	Weeks	Weeks	0.0876573	0.0346881	95	0.0152627	0.064616	Soils
Methylacidiphilaceae	Weeks	Weeks	-0.117325	0.0475673	95	0.0155164	0.0655304	Soils
Cohaesibacteraceae	Weeks	Weeks	0.162437	0.064683	95	0.0158669	0.0668483	Soils
Acidiferrobacteraceae	Germfree	Germfree	-0.0680411	0.0271267	95	0.0159848	0.0671826	Soils
Coleofasciculaceae	Germfree	Germfree	0.0547189	0.0218563	95	0.0161705	0.0677994	Soils
Ferrimonadaceae	Weeks	Weeks	-0.0598532	0.0244522	95	0.0162932	0.0681495	Soils
Candidatus_Babeliaceae	TET_density_Weeks	TET_density_Weeks	-2.42317	0.969605	95	0.0163481	0.0682152	Soils
Pectobacteriaceae	Weeks	Weeks	-0.0624949	0.0250252	95	0.0164224	0.0683612	Soils
Aurantimonadaceae	Weeks	Weeks	0.165087	0.0665556	96	0.0171141	0.0710705	Soils
Immundisolibacteraceae	Germfree	Germfree	0.0646252	0.0260697	95	0.017177	0.0711618	Soils
Fluviibacteraceae	TET_density	TET_density	-0.706083	0.293178	95	0.0180398	0.0745588	Soils
Sphingosinicellaceae	Weeks	Weeks	0.173079	0.070534	96	0.0182609	0.0752936	Soils
Parvicellaceae	Germfree	Germfree	0.118295	0.0483953	95	0.0186861	0.076865	Soils
Parvularculaceae	Weeks	Weeks	0.116614	0.0477933	96	0.0188857	0.0773201	Soils
Thermaceae	Weeks	Weeks	0.0578682	0.0237101	95	0.0188544	0.0773201	Soils
Salinivirgaceae	Weeks	Weeks	-0.141634	0.0581174	95	0.0190206	0.0776896	Soils
Desulfobulbaceae	TET_density	TET_density	-0.225705	0.092713	96	0.0191402	0.077813	Soils
Pelagibacteraceae	TET_density	TET_density	0.95755	0.393224	96	0.0191088	0.077813	Soils
Amoebophilaceae	Weeks	Weeks	-0.235108	0.0967474	95	0.0193416	0.0784485	Soils
Azospirillaceae	Weeks	Weeks	0.146277	0.0602709	96	0.0194886	0.0788332	Soils
Piscirickettsiaceae	Weeks	Weeks	-0.0705281	0.0290697	96	0.0195271	0.0788332	Soils
Azospirillaceae	Germfree	Germfree	0.117239	0.0485373	96	0.0200393	0.0807139	Soils
Parvicellaceae	TET_density_Weeks	TET_density_Weeks	-1.20556	0.499665	95	0.0201694	0.0810503	Soils
Comamonadaceae	Weeks	Weeks	0.147691	0.0612869	96	0.0203116	0.08136	Soils
Sedimentisphaeraceae	Germfree	Germfree	-0.0706969	0.0299387	95	0.02034	0.08136	Soils
Stappiaceae	Weeks	Weeks	0.157106	0.0653475	96	0.0205902	0.0821719	Soils
Thermostichaceae	Weeks	Weeks	0.180316	0.075201	95	0.0209082	0.0832499	Soils
Parvibaculaceae	Germfree	Germfree	-0.16804	0.0701437	96	0.0210155	0.0834862	Soils
Synechococcaceae	Germfree	Germfree	-0.0748826	0.031322	96	0.0212642	0.0842818	Soils
Bryobacteraceae	Weeks	Weeks	0.329177	0.137975	96	0.0215184	0.0850956	Soils
Halanaerobiaceae	Germfree	Germfree	0.125418	0.0527148	96	0.0218601	0.0862507	Soils
Odoribacteraceae	TET_density_Weeks	TET_density_Weeks	-0.952861	0.400809	95	0.0219563	0.0864344	Soils
Oceanospirillaceae	Weeks	Weeks	-0.0865609	0.0375051	96	0.0232673	0.0913884	Soils
Casimicrobiaceae	Germfree	Germfree	-0.060614	0.0257949	95	0.0234415	0.0918652	Soils
Muribaculaceae	TET_density	TET_density	0.707244	0.301629	95	0.0237265	0.0927734	Soils
Eubacteriales_Family_XIII._Incertae_Sedis	Germfree	Germfree	-0.0865506	0.0369435	96	0.023837	0.0929965	Soils
Paludibacteraceae	TET_density	TET_density	1.26957	0.544013	95	0.024354	0.0948007	Soils
Maricaulaceae	Weeks	Weeks	0.119019	0.0512727	96	0.0250785	0.0974031	Soils
Acidobacteriaceae	Weeks	Weeks	-0.194438	0.0838523	96	0.0252246	0.0977523	Soils
Schleiferiaceae	TET_density_Weeks	TET_density_Weeks	-0.815135	0.352028	95	0.0254201	0.0982909	Soils
Barnesiellaceae	TET_density_Weeks	TET_density_Weeks	-0.830883	0.370059	96	0.0271727	0.104835	Soils
Myxococcaceae	TET_density	TET_density	3.08761	1.35484	96	0.0276948	0.106613	Soils
Archangiaceae	TET_density	TET_density	3.6094	1.59771	96	0.0290021	0.111399	Soils
Cohaesibacteraceae	Germfree	Germfree	-0.117604	0.0520905	95	0.0290983	0.111522	Soils
Myxococcaceae	TET_density_Weeks	TET_density_Weeks	-3.12133	1.38515	96	0.0293866	0.112351	Soils
Pseudonocardiaceae	Weeks	Weeks	0.0897138	0.040551	96	0.0294437	0.112351	Soils
Archangiaceae	TET_density_Weeks	TET_density_Weeks	-3.67173	1.63345	96	0.0297687	0.113309	Soils
Kiritimatiellaceae	Weeks	Weeks	0.174703	0.0777487	95	0.029825	0.113309	Soils
Actinopolysporaceae	Germfree	Germfree	-0.0542167	0.0242571	95	0.0306588	0.116223	Soils
Immundisolibacteraceae	Weeks	Weeks	-0.0723136	0.0323719	95	0.0307468	0.116303	Soils
Calditrichaceae	TET_density	TET_density	0.72451	0.325669	95	0.031402	0.118524	Soils
Chrysiogenaceae	Weeks	Weeks	0.133478	0.0600539	95	0.03155	0.118677	Soils
Jonesiaceae	Weeks	Weeks	-0.151011	0.0679834	96	0.0316472	0.118677	Soils
Other	Weeks	Weeks	0.0633891	0.028528	96	0.0315967	0.118677	Soils
Pelagibacteraceae	TET_density_Weeks	TET_density_Weeks	-0.89101	0.40202	96	0.0320098	0.119779	Soils
Desulfomicrobiaceae	Weeks	Weeks	0.0836646	0.037783	95	0.0321562	0.120068	Soils
Porphyromonadaceae	TET_density	TET_density	0.666094	0.307269	95	0.0327849	0.122154	Soils
Zymomonadaceae	Germfree	Germfree	0.105984	0.0481165	95	0.0330286	0.122799	Soils
Zooshikellaceae	TET_density	TET_density	1.40383	0.638715	96	0.03339	0.123878	Soils
Bdellovibrionaceae	Germfree	Germfree	0.224295	0.102229	96	0.0336847	0.124705	Soils
Dietziaceae	Weeks	Weeks	0.0739749	0.0337338	95	0.0337721	0.124763	Soils
Alcaligenaceae	Weeks	Weeks	-0.200408	0.091705	96	0.0343575	0.126657	Soils
Leptotrichiaceae	Weeks	Weeks	-0.167683	0.077028	96	0.035024	0.128841	Soils
Anaerohalosphaeraceae	TET_density	TET_density	-0.852093	0.392471	95	0.0354887	0.129185	Soils
Fluviibacteraceae	TET_density_Weeks	TET_density_Weeks	0.640708	0.299736	95	0.0352319	0.129185	Soils
Paludibacteraceae	TET_density_Weeks	TET_density_Weeks	-1.20895	0.556181	95	0.0352828	0.129185	Soils
Saccharospirillaceae	Weeks	Weeks	-0.0550801	0.0253639	95	0.0354486	0.129185	Soils
Veillonellaceae	Germfree	Germfree	-0.0488111	0.0224683	96	0.0353801	0.129185	Soils
Pirellulaceae	Weeks	Weeks	0.171871	0.0794076	96	0.0360301	0.130882	Soils
Desulfobulbaceae	TET_density_Weeks	TET_density_Weeks	0.204511	0.0947868	96	0.0365899	0.132363	Soils
Methylococcaceae	Weeks	Weeks	-0.048466	0.0224625	95	0.0365861	0.132363	Soils
Enterobacteriaceae	Weeks	Weeks	0.0814746	0.0378592	96	0.0370512	0.133753	Soils
Methylacidiphilaceae	Germfree	Germfree	0.0807303	0.0383069	95	0.0378279	0.136274	Soils
Anaerohalosphaeraceae	Germfree	Germfree	0.0828819	0.0388633	95	0.0387032	0.13914	Soils
Prevotellaceae	TET_density_Weeks	TET_density_Weeks	-0.546353	0.256591	96	0.0389977	0.139739	Soils
Zooshikellaceae	TET_density_Weeks	TET_density_Weeks	-1.39018	0.653002	96	0.0390304	0.139739	Soils
Phreatobacteraceae	Weeks	Weeks	0.154309	0.0726264	96	0.0393997	0.140771	Soils
Alteromonadaceae	Weeks	Weeks	-0.0719998	0.0339585	96	0.0397959	0.141605	Soils
Koleobacteraceae	Weeks	Weeks	-0.13983	0.0659322	95	0.0397434	0.141605	Soils
Leptospiraceae	Weeks	Weeks	0.21866	0.103674	96	0.0407964	0.144869	Soils
Syntrophaceae	Germfree	Germfree	-0.0523048	0.0249113	95	0.0416655	0.147654	Soils
Breoghaniaceae	Germfree	Germfree	-0.0922169	0.0440828	95	0.0423882	0.149909	Soils
Francisellaceae	TET_density	TET_density	1.05704	0.505922	96	0.0426299	0.150217	Soils
Glycomycetaceae	Germfree	Germfree	-0.0535869	0.0256501	95	0.0426478	0.150217	Soils
Oculatellaceae	Germfree	Germfree	-0.0830058	0.0404253	11	0.0429128	0.150845	Soils
Sphingomonadaceae	Weeks	Weeks	0.193121	0.0926652	96	0.0431301	0.151303	Soils
Kineosporiaceae	Germfree	Germfree	0.0409028	0.0196482	95	0.0433518	0.151775	Soils
Emcibacteraceae	Germfree	Germfree	0.0703615	0.0338149	95	0.0434451	0.151796	Soils
Calditrichaceae	TET_density_Weeks	TET_density_Weeks	-0.690221	0.332954	95	0.0441969	0.154113	Soils
Calditrichaceae	Weeks	Weeks	-0.0820348	0.0400443	95	0.0466364	0.162295	Soils
Boseaceae	TET_density	TET_density	1.36953	0.679474	96	0.0467951	0.162522	Soils
Cardiobacteriaceae	Weeks	Weeks	0.074572	0.0364895	95	0.0471441	0.163408	Soils
Halieaceae	Weeks	Weeks	0.0415567	0.0203896	95	0.0477173	0.164646	Soils
Ilumatobacteraceae	Germfree	Germfree	-0.0875296	0.0429787	95	0.0478797	0.164646	Soils
Ruaniaceae	Germfree	Germfree	-0.0434817	0.021339	95	0.0477661	0.164646	Soils
Wenzhouxiangellaceae	Germfree	Germfree	-0.0596304	0.029277	95	0.0478605	0.164646	Soils
Acanthopleuribacteraceae	Weeks	Weeks	0.061018	0.0299878	96	0.0480702	0.164974	Soils
Thioalkalibacteraceae	Germfree	Germfree	-0.0647545	0.0319702	95	0.049055	0.168023	Soils
Nakamurellaceae	Weeks	Weeks	0.0554735	0.0274048	95	0.0491877	0.168146	Soils
Microbacteriaceae	Weeks	Weeks	-0.113261	0.0561455	96	0.0499367	0.170039	Soils
Oleiphilaceae	Weeks	Weeks	-0.0870196	0.0437915	95	0.0499146	0.170039	Soils
Entomoplasmataceae	Weeks	Weeks	-0.316311	0.156921	89	0.0501036	0.170274	Soils
Puniceicoccaceae	Weeks	Weeks	0.198349	0.0984705	95	0.0502611	0.170476	Soils
Mariprofundaceae	Weeks	Weeks	-0.0709897	0.0359535	96	0.0513586	0.173522	Soils
Rubrobacteraceae	Weeks	Weeks	0.0596252	0.0297419	95	0.0513118	0.173522	Soils
Peptococcaceae	Germfree	Germfree	0.0555411	0.0278064	96	0.0521316	0.175452	Soils
Sinobacteraceae	Weeks	Weeks	-0.178144	0.0891565	95	0.0520545	0.175452	Soils
Jatrophihabitantaceae	Weeks	Weeks	0.131165	0.0658851	95	0.0528813	0.177632	Soils
Anaerohalosphaeraceae	TET_density_Weeks	TET_density_Weeks	0.797175	0.40125	95	0.053348	0.178855	Soils
Colwelliaceae	TET_density	TET_density	0.721943	0.365144	96	0.0544594	0.182229	Soils
Blattabacteriaceae	Weeks	Weeks	-0.131315	0.0665837	96	0.0550422	0.183826	Soils
Salinivirgaceae	TET_density	TET_density	0.931653	0.472653	95	0.0551688	0.183896	Soils
Francisellaceae	TET_density_Weeks	TET_density_Weeks	-1.01589	0.517239	96	0.0560068	0.186125	Soils
Glycomycetaceae	Weeks	Weeks	0.0625204	0.0318509	95	0.0561464	0.186125	Soils
Nitrosomonadaceae	TET_density	TET_density	-1.55222	0.790816	96	0.0561584	0.186125	Soils
Comamonadaceae	TET_density_Weeks	TET_density_Weeks	-0.997599	0.509579	96	0.056776	0.187814	Soils
Muribaculaceae	TET_density_Weeks	TET_density_Weeks	-0.603306	0.308376	95	0.0569332	0.187977	Soils
Nocardioidaceae	Germfree	Germfree	-0.0877314	0.0449541	95	0.0575213	0.189559	Soils
Emcibacteraceae	Weeks	Weeks	0.0818549	0.0419894	95	0.0577871	0.190075	Soils
Bernardetiaceae	Germfree	Germfree	0.107221	0.0550476	96	0.0579886	0.190378	Soils
Cardiobacteriaceae	Germfree	Germfree	0.0571619	0.0293857	95	0.0583045	0.191054	Soils
Acholeplasmataceae	Weeks	Weeks	-0.261541	0.13458	96	0.0585334	0.191444	Soils
Orbaceae	TET_density	TET_density	1.0114	0.521591	96	0.0590726	0.192845	Soils
Isosphaeraceae	Weeks	Weeks	0.300661	0.155615	96	0.0599548	0.195358	Soils
Psychromonadaceae	Germfree	Germfree	0.0715079	0.037111	95	0.0606211	0.19716	Soils
Sporolactobacillaceae	Germfree	Germfree	-0.087891	0.0456601	96	0.0608737	0.197612	Soils
Comamonadaceae	TET_density	TET_density	0.958469	0.49843	96	0.0611219	0.198049	Soils
Marinilabiliaceae	TET_density	TET_density	1.26009	0.657269	95	0.0618768	0.200122	Soils
Streptomycetaceae	Weeks	Weeks	-0.116385	0.0616523	96	0.0622437	0.200935	Soils
Bacteroidaceae	TET_density	TET_density	0.60958	0.318721	96	0.062477	0.201315	Soils
Thermoactinomycetaceae	TET_density	TET_density	-0.525492	0.27524	96	0.0629216	0.202373	Soils
Hyphomonadaceae	Germfree	Germfree	0.0747223	0.0393581	95	0.0643511	0.206208	Soils
Oleiphilaceae	Germfree	Germfree	0.0660571	0.0352661	95	0.0642645	0.206208	Soils
Ichthyobacteriaceae	TET_density	TET_density	1.50204	0.794925	95	0.0655751	0.209744	Soils
Orbaceae	TET_density_Weeks	TET_density_Weeks	-1.00386	0.533258	96	0.0665463	0.21246	Soils
Saccharospirillaceae	TET_density	TET_density	-0.386825	0.206278	95	0.0675579	0.215295	Soils
Chelatococcaceae	Germfree	Germfree	-0.0681405	0.0365067	95	0.0687971	0.218444	Soils
Coxiellaceae	Germfree	Germfree	0.0839553	0.0449674	96	0.0687254	0.218444	Soils
Chthonomonadaceae	Weeks	Weeks	0.110415	0.0592822	95	0.0693686	0.219857	Soils
Chamaesiphonaceae	Germfree	Germfree	-0.0944442	0.0507602	96	0.0696484	0.220342	Soils
Cellulomonadaceae	Weeks	Weeks	-0.0991625	0.0534749	95	0.070552	0.222392	Soils
Iamiaceae	Germfree	Germfree	0.146001	0.0787267	96	0.0705288	0.222392	Soils
Stellaceae	Germfree	Germfree	0.0857382	0.0463395	96	0.0711608	0.223906	Soils
Caulobacteraceae	TET_density	TET_density	1.35182	0.733183	96	0.0721155	0.226252	Soils
Methylocystaceae	Weeks	Weeks	0.127426	0.0691245	96	0.0721667	0.226252	Soils
Marinifilaceae	Germfree	Germfree	-0.123172	0.0668843	96	0.0724421	0.226707	Soils
Roseobacteraceae	Germfree	Germfree	0.0960838	0.0523244	96	0.0732315	0.228766	Soils
Eggerthellaceae	Germfree	Germfree	-0.0401469	0.0219004	95	0.0737077	0.229841	Soils
Sterolibacteriaceae	Weeks	Weeks	-0.0477039	0.0260608	95	0.0741136	0.230694	Soils
Candidatus_Deianiraeaceae	Weeks	Weeks	-0.210148	0.114917	93	0.0743874	0.231132	Soils
Hyphomonadaceae	TET_density	TET_density	-0.7255	0.397468	95	0.0749062	0.232329	Soils
Magnetococcaceae	TET_density	TET_density	-0.501408	0.274935	95	0.0751475	0.232608	Soils
Thermoactinomycetaceae	TET_density_Weeks	TET_density_Weeks	0.51298	0.281396	96	0.0752632	0.232608	Soils
Dysgonomonadaceae	TET_density	TET_density	0.727555	0.399982	95	0.0758849	0.233286	Soils
Rhodocyclaceae	Germfree	Germfree	0.092316	0.0507364	96	0.0757984	0.233286	Soils
Sedimentisphaeraceae	Weeks	Weeks	0.0667635	0.0371762	95	0.0758346	0.233286	Soils
Nitrosomonadaceae	TET_density_Weeks	TET_density_Weeks	1.466	0.808505	96	0.0767816	0.235626	Soils
Porphyromonadaceae	TET_density_Weeks	TET_density_Weeks	-0.558069	0.314142	95	0.078995	0.241992	Soils
Chlamydiaceae	Germfree	Germfree	0.200745	0.111716	94	0.079373	0.242657	Soils
Ktedonosporobacteraceae	TET_density	TET_density	-1.89274	1.05375	95	0.0794911	0.242657	Soils
Maricaulaceae	Germfree	Germfree	0.0739603	0.0412909	96	0.0803011	0.2447	Soils
Colwelliaceae	TET_density_Weeks	TET_density_Weeks	-0.667238	0.373312	96	0.0809309	0.246189	Soils
Geovibrionaceae	Germfree	Germfree	-0.0503145	0.028525	95	0.0811099	0.246302	Soils
Aquificaceae	Weeks	Weeks	-0.395768	0.0509021	96	1.11622e-11	9.73345e-09	Leaves
Geminocystaceae	Weeks	Weeks	-0.322166	0.0371576	96	5.44428e-11	1.82992e-08	Leaves
Kofleriaceae	Weeks	Weeks	-0.361681	0.0488171	96	6.2956e-11	1.82992e-08	Leaves
Chamaesiphonaceae	Weeks	Weeks	-0.386983	0.0570174	96	1.13624e-09	2.477e-07	Leaves
Bifidobacteriaceae	Weeks	Weeks	2.0826	0.271927	63	1.45061e-09	2.52987e-07	Leaves
Coriobacteriaceae	Weeks	Weeks	1.95182	0.270192	45	6.10954e-09	8.8792e-07	Leaves
Hapalosiphonaceae	Weeks	Weeks	-0.443852	0.0629127	96	1.07113e-08	1.33432e-06	Leaves
Hyellaceae	Weeks	Weeks	-0.449918	0.0649562	96	1.64432e-08	1.79231e-06	Leaves
Kangiellaceae	Weeks	Weeks	-0.392939	0.0584318	96	3.22609e-08	2.81315e-06	Leaves
Other	Weeks	Weeks	-0.256667	0.0380474	96	3.00501e-08	2.81315e-06	Leaves
Calotrichaceae	Weeks	Weeks	-0.211807	0.0316433	96	3.58056e-08	2.8384e-06	Leaves
Chroococcaceae	Weeks	Weeks	-0.426739	0.0645731	96	4.75817e-08	3.4576e-06	Leaves
Tannerellaceae	Weeks	Weeks	1.04965	0.161874	96	7.21454e-08	4.83929e-06	Leaves
Acholeplasmataceae	Weeks	Weeks	-0.307111	0.0478621	96	9.05306e-08	5.13476e-06	Leaves
Actinomycetaceae	Weeks	Weeks	-0.394323	0.061568	96	9.42158e-08	5.13476e-06	Leaves
Alicyclobacillaceae	Weeks	Weeks	-0.406003	0.0632714	96	9.04479e-08	5.13476e-06	Leaves
Aphanizomenonaceae	Weeks	Weeks	-0.429655	0.0675233	96	1.08312e-07	5.37507e-06	Leaves
Desulfotomaculaceae	Weeks	Weeks	-0.453705	0.0715448	96	1.16414e-07	5.37507e-06	Leaves
Pseudanabaenaceae	Weeks	Weeks	-0.416543	0.0657034	96	1.17117e-07	5.37507e-06	Leaves
Coprobacillaceae	Weeks	Weeks	0.849854	0.136658	90	1.7564e-07	6.67828e-06	Leaves
Lactobacillaceae	Weeks	Weeks	-0.186258	0.0299738	96	1.78511e-07	6.67828e-06	Leaves
Oscillospiraceae	Weeks	Weeks	0.977827	0.157792	96	1.89021e-07	6.67828e-06	Leaves
Phycisphaeraceae	Weeks	Weeks	-0.400337	0.0641639	96	1.64006e-07	6.67828e-06	Leaves
Prochlorococcaceae	Weeks	Weeks	-0.356146	0.0575068	96	1.91464e-07	6.67828e-06	Leaves
Veillonellaceae	Weeks	Weeks	0.428839	0.0685232	96	1.53875e-07	6.67828e-06	Leaves
Merismopediaceae	Weeks	Weeks	-0.375093	0.0609801	96	2.20427e-07	7.39279e-06	Leaves
Blattabacteriaceae	Weeks	Weeks	-0.227822	0.037134	96	2.32516e-07	7.5094e-06	Leaves
Selenomonadaceae	Weeks	Weeks	0.607722	0.109831	95	2.9988e-07	9.33912e-06	Leaves
Helicobacteraceae	Weeks	Weeks	-0.26169	0.0474817	96	3.29177e-07	9.70794e-06	Leaves
Synechococcaceae	Weeks	Weeks	-0.404691	0.0671458	96	3.33989e-07	9.70794e-06	Leaves
Nostocaceae	Weeks	Weeks	-0.263731	0.0441315	96	3.96215e-07	1.07969e-05	Leaves
Odoribacteraceae	Weeks	Weeks	0.979679	0.163772	88	3.88412e-07	1.07969e-05	Leaves
Acidaminococcaceae	Weeks	Weeks	0.879078	0.148043	95	4.49977e-07	1.18903e-05	Leaves
Akkermansiaceae	Weeks	Weeks	1.00776	0.171296	95	5.40621e-07	1.38653e-05	Leaves
Leptolyngbyaceae	Weeks	Weeks	-0.384851	0.065626	96	5.75821e-07	1.40474e-05	Leaves
Microcoleaceae	Weeks	Weeks	-0.365896	0.0624164	96	5.7994e-07	1.40474e-05	Leaves
Aphanothecaceae	Weeks	Weeks	-0.387848	0.0664577	96	6.32977e-07	1.45252e-05	Leaves
Rikenellaceae	Weeks	Weeks	1.93787	0.331724	60	6.2082e-07	1.45252e-05	Leaves
Alteromonadaceae	Weeks	Weeks	-0.305637	0.0526367	96	6.98583e-07	1.52291e-05	Leaves
Chroococcidiopsidaceae	Weeks	Weeks	-0.410017	0.0705227	96	6.81388e-07	1.52291e-05	Leaves
Desulfobacteraceae	Weeks	Weeks	0.238447	0.0424208	96	1.29768e-06	2.69423e-05	Leaves
Piscirickettsiaceae	Weeks	Weeks	-0.259897	0.0462294	96	1.29374e-06	2.69423e-05	Leaves
Coxiellaceae	Weeks	Weeks	-0.317086	0.061376	96	1.40078e-06	2.84065e-05	Leaves
Tolypothrichaceae	Weeks	Weeks	-0.34632	0.0623119	96	1.60154e-06	3.17397e-05	Leaves
Bacteroidaceae	Weeks	Weeks	1.00346	0.180844	96	1.6507e-06	3.1987e-05	Leaves
Microcystaceae	Weeks	Weeks	-0.323261	0.0585071	96	1.78558e-06	3.38484e-05	Leaves
Mariprofundaceae	Weeks	Weeks	-0.362522	0.0657111	96	1.83522e-06	3.40492e-05	Leaves
Gomontiellaceae	Weeks	Weeks	-0.355461	0.0648658	96	2.07524e-06	3.71717e-05	Leaves
Micrococcaceae	Weeks	Weeks	1.1898	0.217197	89	2.08878e-06	3.71717e-05	Leaves
Oscillatoriaceae	Weeks	Weeks	-0.271018	0.0512286	96	3.89135e-06	6.78651e-05	Leaves
Opitutaceae	Weeks	Weeks	0.991103	0.189968	96	4.95482e-06	8.47177e-05	Leaves
Mycoplasmataceae	Weeks	Weeks	-0.148461	0.0285834	96	5.35083e-06	8.97293e-05	Leaves
Comamonadaceae	Weeks	Weeks	0.365962	0.0709423	96	6.01222e-06	9.70862e-05	Leaves
Hymenobacteraceae	Weeks	Weeks	0.283899	0.0550285	96	6.00169e-06	9.70862e-05	Leaves
Dermocarpellaceae	Weeks	Weeks	-0.362217	0.0707466	96	6.82844e-06	0.000108262	Leaves
Leptospiraceae	Weeks	Weeks	0.197119	0.0391057	96	8.85897e-06	0.000137947	Leaves
Fibrobacteraceae	Weeks	Weeks	-0.36954	0.0739273	96	1.01658e-05	0.00015552	Leaves
Candidatus_Absconditicoccaceae	Weeks	Weeks	-0.337478	0.0679899	96	1.14014e-05	0.000171414	Leaves
Archangiaceae	Weeks	Weeks	0.832625	0.170791	92	1.52221e-05	0.000224978	Leaves
Beijerinckiaceae	Weeks	Weeks	1.11571	0.23018	43	1.66747e-05	0.000242339	Leaves
Muribaculaceae	Weeks	Weeks	1.59574	0.335283	71	2.2171e-05	0.000316936	Leaves
Methylocystaceae	Weeks	Weeks	0.447555	0.0962451	96	3.15514e-05	0.000443755	Leaves
Eggerthellaceae	Weeks	Weeks	0.861382	0.185446	53	3.20872e-05	0.000444128	Leaves
Mucispirillaceae	Weeks	Weeks	0.594755	0.128614	91	3.42874e-05	0.000464235	Leaves
Pasteurellaceae	Weeks	Weeks	-0.280351	0.0606627	96	3.46046e-05	0.000464235	Leaves
Frankiaceae	Weeks	Weeks	0.267856	0.0581926	96	3.67298e-05	0.000485278	Leaves
Listeriaceae	Weeks	Weeks	0.216756	0.0512703	96	5.60752e-05	0.000729815	Leaves
Jonesiaceae	Weeks	Weeks	0.213832	0.0507728	96	5.95408e-05	0.000742277	Leaves
Legionellaceae	Weeks	Weeks	0.274866	0.0617449	96	5.95865e-05	0.000742277	Leaves
Sphaerotilaceae	Weeks	Weeks	0.789019	0.176987	92	5.83807e-05	0.000742277	Leaves
Rhodospirillaceae	Weeks	Weeks	0.388525	0.0879584	96	6.6495e-05	0.000816671	Leaves
Yersiniaceae	Weeks	Weeks	0.204467	0.0467399	96	7.6105e-05	0.000921716	Leaves
Ornithinimicrobiaceae	Weeks	Weeks	0.203059	0.0464934	96	7.78314e-05	0.000929712	Leaves
Thermoactinomycetaceae	Weeks	Weeks	-0.529236	0.121681	95	8.24259e-05	0.000971289	Leaves
Lachnospiraceae	Weeks	Weeks	0.518306	0.119893	96	8.95636e-05	0.00102762	Leaves
Saprospiraceae	Weeks	Weeks	0.237665	0.0549445	96	8.88616e-05	0.00102762	Leaves
Boseaceae	Weeks	Weeks	1.06439	0.246507	76	9.10392e-05	0.00103099	Leaves
Campylobacteraceae	Weeks	Weeks	-0.108768	0.0253624	96	9.98466e-05	0.00111623	Leaves
Acaryochloridaceae	Weeks	Weeks	-0.226143	0.0528216	96	0.00010217	0.00112776	Leaves
Vibrionaceae	Weeks	Weeks	0.122908	0.0308645	96	0.000137282	0.00149637	Leaves
Dermacoccaceae	Weeks	Weeks	0.191391	0.0464825	96	0.000170473	0.00183521	Leaves
Prevotellaceae	Weeks	Weeks	0.291146	0.070807	96	0.000173496	0.00184498	Leaves
Microbacteriaceae	Weeks	Weeks	1.1985	0.294645	94	0.000198968	0.00209037	Leaves
Nitrobacteraceae	Weeks	Weeks	0.779744	0.192432	96	0.000208774	0.00216727	Leaves
Cytophagaceae	Weeks	Weeks	0.297021	0.0734055	95	0.000212507	0.00218007	Leaves
Enterococcaceae	Weeks	Weeks	0.135332	0.0335475	96	0.000220693	0.00223773	Leaves
Zooshikellaceae	Weeks	Weeks	0.183878	0.0462025	96	0.000260736	0.00261335	Leaves
Cyclobacteriaceae	Weeks	Weeks	0.178723	0.0450431	96	0.000270519	0.0026806	Leaves
Phyllobacteriaceae	Weeks	Weeks	0.764792	0.194736	96	0.000306195	0.00293409	Leaves
Rhizobiaceae	Weeks	Weeks	0.338484	0.0861154	96	0.000303162	0.00293409	Leaves
Spiroplasmataceae	Weeks	Weeks	0.185919	0.0473356	96	0.000305871	0.00293409	Leaves
Eubacteriaceae	Weeks	Weeks	-0.137663	0.0369399	96	0.000336548	0.00318989	Leaves
Oceanospirillaceae	Weeks	Weeks	0.210431	0.0540878	96	0.000342511	0.0032115	Leaves
Rhodobacteraceae	Weeks	Weeks	0.942447	0.254783	82	0.000370038	0.00343269	Leaves
Myxococcaceae	Weeks	Weeks	0.892882	0.23136	67	0.000376644	0.00345719	Leaves
Parvularculaceae	Weeks	Weeks	0.243648	0.0632985	95	0.000388335	0.00349551	Leaves
Treponemataceae	Weeks	Weeks	0.216526	0.0562585	96	0.000388836	0.00349551	Leaves
Hyphomicrobiaceae	Weeks	Weeks	0.540193	0.142179	96	0.000451392	0.00401647	Leaves
Stappiaceae	Germfree	Germfree	-0.695829	0.183677	69	0.0004667	0.00411073	Leaves
Bartonellaceae	Weeks	Weeks	0.23913	0.0631797	96	0.000471528	0.00411173	Leaves
Corynebacteriaceae	Weeks	Weeks	0.294886	0.0779801	96	0.000476321	0.00411239	Leaves
Silvanigrellaceae	Weeks	Weeks	0.165598	0.0440363	96	0.000507458	0.00433827	Leaves
Erythrobacteraceae	Germfree	Germfree	-1.02123	0.27198	57	0.000516197	0.00437013	Leaves
Leptotrichiaceae	Weeks	Weeks	0.176749	0.0472945	96	0.000544147	0.00451901	Leaves
Thermoanaerobacterales_Family_III._Incertae_Sedis	Weeks	Weeks	0.172832	0.0462291	96	0.000541879	0.00451901	Leaves
Vallitaleaceae	Weeks	Weeks	0.175402	0.0471102	96	0.000567384	0.00466754	Leaves
Nautiliaceae	Weeks	Weeks	0.197513	0.0536001	96	0.000636062	0.00518361	Leaves
Flammeovirgaceae	Weeks	Weeks	0.15047	0.0415735	96	0.000772594	0.00623798	Leaves
Streptococcaceae	Weeks	Weeks	0.441957	0.124131	96	0.000919134	0.00735308	Leaves
Francisellaceae	Weeks	Weeks	0.17247	0.0486357	96	0.000958316	0.00759684	Leaves
Pseudonocardiaceae	Weeks	Weeks	-0.219001	0.0618151	96	0.000967736	0.0076024	Leaves
Neisseriaceae	Weeks	Weeks	0.14406	0.0407894	96	0.000999477	0.00778164	Leaves
Carnobacteriaceae	Weeks	Weeks	0.166638	0.0481331	96	0.00122462	0.00945015	Leaves
Xanthobacteraceae	Weeks	Weeks	0.498415	0.144331	96	0.00125606	0.00960772	Leaves
Acidobacteriaceae	Weeks	Weeks	0.711246	0.206468	93	0.00128719	0.00976024	Leaves
Planctomycetaceae	Weeks	Weeks	-0.147861	0.0434219	96	0.00144301	0.0108474	Leaves
Borreliaceae	Weeks	Weeks	0.182192	0.0535677	96	0.00145999	0.0108813	Leaves
Orbaceae	Weeks	Weeks	0.177378	0.0524306	96	0.00153771	0.0113634	Leaves
Rhabdochlamydiaceae	Weeks	Weeks	0.177932	0.053091	96	0.00168346	0.0123359	Leaves
Propionibacteriaceae	Weeks	Weeks	0.609357	0.184534	86	0.00193718	0.0140768	Leaves
Thermodesulfobacteriaceae	Weeks	Weeks	0.182836	0.0559496	96	0.00213449	0.0153824	Leaves
Polyangiaceae	Weeks	Weeks	0.440694	0.139661	96	0.00217267	0.0155293	Leaves
Staphylococcaceae	Weeks	Weeks	0.157509	0.0492918	96	0.00261598	0.0185458	Leaves
Azospirillaceae	Germfree	Germfree	-0.981742	0.307842	70	0.00266262	0.0187242	Leaves
Fusobacteriaceae	Weeks	Weeks	0.127273	0.0399507	96	0.00268761	0.0187488	Leaves
Prolixibacteraceae	Weeks	Weeks	0.255679	0.0806715	93	0.00281302	0.0194679	Leaves
Peptoniphilaceae	Weeks	Weeks	0.142475	0.0453005	96	0.00300923	0.0206618	Leaves
Arcobacteraceae	Weeks	Weeks	0.134297	0.0428316	96	0.00309067	0.0208775	Leaves
Aurantimonadaceae	Weeks	Weeks	0.351539	0.112281	96	0.00313013	0.0208775	Leaves
Iamiaceae	Weeks	Weeks	0.734063	0.233933	53	0.00306977	0.0208775	Leaves
Sphingomonadaceae	Germfree	Germfree	-1.24325	0.397186	96	0.00313641	0.0208775	Leaves
Pseudoalteromonadaceae	Weeks	Weeks	0.164733	0.0527198	96	0.00318415	0.0210347	Leaves
Alcaligenaceae	Weeks	Weeks	-0.236731	0.0765384	96	0.00347496	0.0227832	Leaves
Flavobacteriaceae	Weeks	Weeks	0.135113	0.0441876	96	0.0038276	0.024908	Leaves
Desulfobulbaceae	Weeks	Weeks	0.179261	0.0595212	96	0.00433836	0.0276135	Leaves
Gordoniaceae	Weeks	Weeks	0.338159	0.112261	91	0.00433204	0.0276135	Leaves
Moritellaceae	Weeks	Weeks	0.232922	0.0795088	95	0.00429058	0.0276135	Leaves
Spirosomaceae	Weeks	Weeks	0.286826	0.0962435	95	0.00472439	0.0298527	Leaves
Entomoplasmataceae	Weeks	Weeks	0.176488	0.0596229	96	0.00498768	0.0312896	Leaves
Chromatiaceae	Weeks	Weeks	0.236088	0.0805465	96	0.00539114	0.0335791	Leaves
Desulfovibrionaceae	Weeks	Weeks	0.370401	0.126771	90	0.0055262	0.0341762	Leaves
Peptococcaceae	Weeks	Weeks	0.151342	0.0519507	96	0.00565515	0.0346411	Leaves
Stappiaceae	Weeks	Weeks	0.664048	0.228079	69	0.00568081	0.0346411	Leaves
Bdellovibrionaceae	Weeks	Weeks	0.289501	0.0999727	92	0.00592298	0.0356196	Leaves
Micrococcaceae	Germfree	Germfree	-0.506713	0.174913	89	0.00590494	0.0356196	Leaves
Brachyspiraceae	Weeks	Weeks	0.123268	0.0427059	96	0.0060721	0.0362662	Leaves
Micromonosporaceae	Weeks	Weeks	0.29143	0.106503	96	0.0074699	0.0440118	Leaves
Sporomusaceae	Weeks	Weeks	0.219231	0.0780498	94	0.00744948	0.0440118	Leaves
Acetobacteraceae	Weeks	Weeks	0.59768	0.214103	92	0.00779409	0.0456137	Leaves
Anaplasmataceae	Weeks	Weeks	-0.0830079	0.0307179	96	0.00821583	0.0477613	Leaves
Cellulomonadaceae	Weeks	Weeks	0.758807	0.274087	30	0.00827612	0.0477932	Leaves
Dehalococcoidaceae	Weeks	Weeks	0.123404	0.0449324	96	0.00876309	0.0501944	Leaves
Devosiaceae	Weeks	Weeks	0.789061	0.287507	80	0.00880705	0.0501944	Leaves
Aeromonadaceae	Weeks	Weeks	0.210063	0.0768682	95	0.00907769	0.051401	Leaves
Petrotogaceae	Weeks	Weeks	0.148508	0.0548897	96	0.00973537	0.0544421	Leaves
Rhodobacteraceae	Germfree	Germfree	-0.541802	0.205182	82	0.00973964	0.0544421	Leaves
Peptostreptococcaceae	Weeks	Weeks	-0.163264	0.0605936	96	0.0100177	0.05564	Leaves
Gemmataceae	Weeks	Weeks	0.555105	0.206546	67	0.0101949	0.0562653	Leaves
Gloeobacteraceae	Weeks	Weeks	0.0866805	0.0330773	96	0.0102876	0.0564199	Leaves
Turicibacteraceae	Weeks	Weeks	0.28576	0.108182	82	0.0114625	0.0624705	Leaves
Roseobacteraceae	Germfree	Germfree	-0.19594	0.0758914	96	0.0133179	0.0721318	Leaves
Halanaerobiaceae	Weeks	Weeks	0.130069	0.0508346	96	0.0141108	0.0759547	Leaves
Pirellulaceae	Weeks	Weeks	0.296164	0.119209	93	0.0148056	0.0792053	Leaves
Pectobacteriaceae	Weeks	Weeks	0.24689	0.0976868	95	0.0152497	0.0810838	Leaves
Dysgonomonadaceae	Weeks	Weeks	0.501657	0.200127	73	0.0160468	0.0842941	Leaves
Sphingosinicellaceae	Germfree	Germfree	-0.470499	0.187617	19	0.0160048	0.0842941	Leaves
Metamycoplasmataceae	Weeks	Weeks	0.159475	0.0643042	96	0.0171322	0.089457	Leaves
Odoribacteraceae	TET_density	TET_density	3.29954	1.33192	88	0.0172466	0.0895179	Leaves
Tissierellaceae	Weeks	Weeks	0.127384	0.0515705	96	0.0175521	0.0905648	Leaves
Mycobacteriaceae	Weeks	Weeks	-0.19962	0.081132	96	0.0179703	0.0921768	Leaves
Shewanellaceae	Weeks	Weeks	0.144325	0.0593336	96	0.0192337	0.0980806	Leaves
Fulvivirgaceae	Weeks	Weeks	0.218215	0.0901882	94	0.0198412	0.10059	Leaves
Acetobacteraceae	Germfree	Germfree	-0.415922	0.172421	92	0.0201941	0.101787	Leaves
Odoribacteraceae	TET_density_Weeks	TET_density_Weeks	-3.27532	1.36171	88	0.0205338	0.102317	Leaves
Thiovulaceae	Weeks	Weeks	0.190748	0.0792445	96	0.0204464	0.102317	Leaves
Prolixibacteraceae	TET_density_Weeks	TET_density_Weeks	-1.61113	0.670755	93	0.0206995	0.102557	Leaves
Geobacteraceae	Germfree	Germfree	-0.308743	0.132768	61	0.0222723	0.109725	Leaves
Acidithiobacillaceae	Weeks	Weeks	0.134755	0.0570968	95	0.022876	0.112067	Leaves
Nocardiaceae	Germfree	Germfree	-0.151517	0.0658334	96	0.0262714	0.127981	Leaves
Prolixibacteraceae	TET_density	TET_density	1.50231	0.65608	93	0.0270001	0.129363	Leaves
Streptococcaceae	TET_density	TET_density	2.31183	1.00952	96	0.0269877	0.129363	Leaves
Streptococcaceae	TET_density_Weeks	TET_density_Weeks	-2.36682	1.0321	96	0.0267877	0.129363	Leaves
Nocardioidaceae	Germfree	Germfree	-0.644582	0.28413	83	0.0283684	0.135176	Leaves
Chromobacteriaceae	Weeks	Weeks	0.257522	0.113749	96	0.0286784	0.135911	Leaves
Methylobacteriaceae	Germfree	Germfree	-0.618545	0.273716	95	0.0289551	0.13648	Leaves
Opitutaceae	Germfree	Germfree	-0.341478	0.152985	96	0.0308697	0.144722	Leaves
Eubacteriales_Family_XIII._Incertae_Sedis	Weeks	Weeks	-0.149667	0.0688229	93	0.0322487	0.150379	Leaves
Moraxellaceae	Weeks	Weeks	-0.74749	0.341362	96	0.0340172	0.157782	Leaves
Rickettsiaceae	Weeks	Weeks	-0.080283	0.0374993	96	0.0349537	0.161268	Leaves
Parvularculaceae	Germfree	Germfree	0.11085	0.0509755	95	0.0352105	0.161598	Leaves
Mucispirillaceae	TET_density	TET_density	2.27032	1.04599	91	0.0355366	0.16224	Leaves
Mucispirillaceae	TET_density_Weeks	TET_density_Weeks	-2.31146	1.06938	91	0.0362691	0.164722	Leaves
Beijerinckiaceae	Germfree	Germfree	-0.399475	0.185368	43	0.0368016	0.166275	Leaves
Oxalobacteraceae	Weeks	Weeks	-0.486745	0.228023	96	0.0385322	0.172308	Leaves
Sphingomonadaceae	Weeks	Weeks	-1.0532	0.493203	96	0.0384628	0.172308	Leaves
Nitratiruptoraceae	Weeks	Weeks	-0.165737	0.0784034	94	0.0403622	0.179571	Leaves
Sphingosinicellaceae	Weeks	Weeks	0.486969	0.232972	19	0.0425444	0.188318	Leaves
Sphingobacteriaceae	Weeks	Weeks	0.0673629	0.0322636	96	0.0427664	0.188345	Leaves
Moraxellaceae	Germfree	Germfree	-0.565365	0.274905	96	0.0458267	0.200808	Leaves
Nitrobacteraceae	Germfree	Germfree	-0.318285	0.154969	96	0.0461017	0.201003	Leaves
Micromonosporaceae	Germfree	Germfree	-0.172404	0.0857689	96	0.0473814	0.205555	Leaves
Streptosporangiaceae	Germfree	Germfree	-0.423862	0.208257	56	0.0480155	0.207275	Leaves
Scytonemataceae	Weeks	Weeks	-0.213244	0.106145	96	0.0508428	0.218398	Leaves
Rhodanobacteraceae	Weeks	Weeks	0.414334	0.209452	96	0.0543376	0.232267	Leaves
Geobacteraceae	Weeks	Weeks	0.320763	0.164864	61	0.0547868	0.233044	Leaves
Thermoanaerobacteraceae	Weeks	Weeks	0.179559	0.0912701	95	0.0556164	0.235425	Leaves
Zoogloeaceae	Germfree	Germfree	-0.427815	0.219016	41	0.0573046	0.241399	Leaves
Turicibacteraceae	TET_density_Weeks	TET_density_Weeks	-1.74543	0.899491	82	0.0588986	0.246921	Leaves
Colwelliaceae	Weeks	Weeks	0.13754	0.0712039	96	0.060012	0.24921	Leaves
Phyllobacteriaceae	Germfree	Germfree	-0.302923	0.156825	96	0.0600163	0.24921	Leaves
Pseudomonadaceae	Germfree	Germfree	0.959907	0.0766542	96	6.14871e-16	1.05266e-12	Roots
Planctomycetaceae	Germfree	Germfree	0.183744	0.0197601	96	7.47836e-12	6.40148e-09	Roots
Phyllobacteriaceae	Germfree	Germfree	-0.263028	0.0322501	96	2.85415e-10	1.62877e-07	Roots
Boseaceae	Germfree	Germfree	0.326532	0.0434547	96	2.33461e-09	9.38953e-07	Roots
Kaistiaceae	Weeks	Weeks	0.240846	0.0322608	96	2.74227e-09	9.38953e-07	Roots
Kaistiaceae	Germfree	Germfree	0.191702	0.0259802	96	3.65506e-09	1.04291e-06	Roots
Acidithiobacillaceae	Germfree	Germfree	-0.0862092	0.011765	96	4.32974e-09	1.05893e-06	Roots
Hyphomonadaceae	Weeks	Weeks	0.137447	0.0216559	96	8.42785e-09	1.60316e-06	Roots
Streptomycetaceae	Germfree	Germfree	-0.269451	0.0376839	96	7.80154e-09	1.60316e-06	Roots
Devosiaceae	Germfree	Germfree	0.230381	0.0324729	96	9.39109e-09	1.60775e-06	Roots
Rickettsiaceae	Germfree	Germfree	0.244298	0.0365436	96	3.68348e-08	5.73284e-06	Roots
Fimbriimonadaceae	Weeks	Weeks	0.244274	0.037493	96	6.50632e-08	9.28234e-06	Roots
Mycobacteriaceae	Germfree	Germfree	-0.284829	0.0443769	96	8.99819e-08	1.18499e-05	Roots
Isosphaeraceae	Germfree	Germfree	0.286358	0.0453637	96	1.28321e-07	1.56918e-05	Roots
Hymenobacteraceae	Germfree	Germfree	0.17691	0.0285297	96	1.86518e-07	2.12879e-05	Roots
Hyphomonadaceae	Germfree	Germfree	0.0979253	0.0174399	96	2.11366e-07	2.26162e-05	Roots
Anaplasmataceae	Germfree	Germfree	0.242922	0.0396697	96	2.41663e-07	2.43369e-05	Roots
Desulfocapsaceae	Germfree	Germfree	-0.0979112	0.0160982	96	2.77704e-07	2.64127e-05	Roots
Paenibacillaceae	Germfree	Germfree	0.431385	0.0714107	96	3.18841e-07	2.87293e-05	Roots
Azospirillaceae	Weeks	Weeks	0.094117	0.0171293	96	3.53684e-07	3.02753e-05	Roots
Phototrophicaceae	Germfree	Germfree	-0.256036	0.0431569	96	4.58057e-07	3.73426e-05	Roots
Pleomorphomonadaceae	Weeks	Weeks	0.104957	0.0178829	96	5.66576e-07	4.40899e-05	Roots
Candidatus_Deianiraeaceae	Germfree	Germfree	0.334146	0.0573036	96	6.4332e-07	4.58902e-05	Roots
Methylophilaceae	Weeks	Weeks	-0.696776	0.119309	96	6.24391e-07	4.58902e-05	Roots
Ardenticatenaceae	Germfree	Germfree	-0.112446	0.0193791	96	7.08188e-07	4.66315e-05	Roots
Granulosicoccaceae	Germfree	Germfree	0.0807623	0.0138992	96	6.89129e-07	4.66315e-05	Roots
Fluviibacteraceae	Weeks	Weeks	-0.187597	0.0325763	96	8.19572e-07	5.19669e-05	Roots
Mangrovivirgaceae	Weeks	Weeks	-0.190777	0.0332062	96	8.57344e-07	5.24205e-05	Roots
Stellaceae	Weeks	Weeks	0.120195	0.0211632	96	1.06796e-06	6.30465e-05	Roots
Desulfocapsaceae	Weeks	Weeks	-0.112486	0.0199898	96	1.27132e-06	7.25498e-05	Roots
Gloeomargaritaceae	Germfree	Germfree	0.188971	0.0337761	96	1.41601e-06	7.82005e-05	Roots
Thermosynechococcaceae	Germfree	Germfree	-0.0999407	0.017943	96	1.53854e-06	8.2312e-05	Roots
Caulobacteraceae	Germfree	Germfree	0.368708	0.0667844	96	1.81117e-06	9.11977e-05	Roots
Xanthobacteraceae	Germfree	Germfree	-0.120111	0.0217531	96	1.80699e-06	9.11977e-05	Roots
Aurantimonadaceae	Weeks	Weeks	0.0911451	0.0165873	96	1.97482e-06	9.65971e-05	Roots
Stellaceae	Germfree	Germfree	0.0934671	0.0170432	96	2.04651e-06	9.73228e-05	Roots
Heliobacteriaceae	Germfree	Germfree	-0.0740657	0.0135763	96	2.2506e-06	0.000104136	Roots
Chroococcidiopsidaceae	Germfree	Germfree	-0.0808743	0.0162657	96	3.10223e-06	0.000139763	Roots
Syntrophobacteraceae	Germfree	Germfree	-0.0959361	0.017983	96	3.35902e-06	0.000147452	Roots
Dermatophilaceae	Germfree	Germfree	-0.0860611	0.0161709	96	3.50494e-06	0.000149119	Roots
Frankiaceae	Germfree	Germfree	-0.0876154	0.0164805	96	3.57119e-06	0.000149119	Roots
Thioalkalispiraceae	Weeks	Weeks	0.115945	0.0218761	96	3.7684e-06	0.000153607	Roots
Steroidobacteraceae	Weeks	Weeks	0.112307	0.0229647	96	4.31344e-06	0.000171735	Roots
Gordoniaceae	Germfree	Germfree	-0.073758	0.0141124	96	4.80609e-06	0.000176542	Roots
Nitrosomonadaceae	Weeks	Weeks	-0.439102	0.0840557	96	4.84665e-06	0.000176542	Roots
Sulfuricellaceae	Weeks	Weeks	-0.0768533	0.0147032	96	4.79832e-06	0.000176542	Roots
Tsukamurellaceae	Germfree	Germfree	-0.0630359	0.0120494	96	4.72816e-06	0.000176542	Roots
Beijerinckiaceae	Germfree	Germfree	-0.392974	0.0760069	96	5.78565e-06	0.000202143	Roots
Parvibaculaceae	Weeks	Weeks	0.165378	0.031965	96	5.7194e-06	0.000202143	Roots
Ferrimonadaceae	Germfree	Germfree	0.0787188	0.0153835	96	6.89205e-06	0.000235984	Roots
Iamiaceae	Weeks	Weeks	0.367519	0.0722414	96	7.59987e-06	0.000255117	Roots
Moraxellaceae	Weeks	Weeks	-1.29689	0.255583	96	7.93516e-06	0.000259906	Roots
Thalassobaculaceae	Weeks	Weeks	0.101559	0.0200314	96	8.04616e-06	0.000259906	Roots
Amorphaceae	Weeks	Weeks	0.0713343	0.0151107	96	8.47933e-06	0.000263938	Roots
Chlorobiaceae	Germfree	Germfree	-0.0502459	0.00993325	96	8.35978e-06	0.000263938	Roots
Nitrobacteraceae	Germfree	Germfree	-0.216582	0.0430048	96	8.9892e-06	0.000270541	Roots
Oxalobacteraceae	Weeks	Weeks	-0.972434	0.193111	96	9.00748e-06	0.000270541	Roots
Dermacoccaceae	Germfree	Germfree	-0.0883419	0.0175641	96	9.1843e-06	0.000271095	Roots
Tissierellaceae	Germfree	Germfree	0.211732	0.0421593	96	9.41244e-06	0.00027312	Roots
Nocardiaceae	Germfree	Germfree	-0.062237	0.0124669	96	1.0385e-05	0.000296319	Roots
Acetobacteraceae	Germfree	Germfree	0.0765856	0.0153747	96	1.07625e-05	0.000297185	Roots
Nocardioidaceae	Germfree	Germfree	-0.210765	0.0423018	96	1.07231e-05	0.000297185	Roots
Halomonadaceae	Germfree	Germfree	0.0476604	0.00971439	96	1.37563e-05	0.000370928	Roots
Spirosomaceae	Germfree	Germfree	0.154232	0.0314521	96	1.38665e-05	0.000370928	Roots
Fibrobacteraceae	Germfree	Germfree	-0.083578	0.018284	96	1.52299e-05	0.000395055	Roots
Holosporaceae	Weeks	Weeks	-0.132454	0.0271478	96	1.50313e-05	0.000395055	Roots
Pirellulaceae	Germfree	Germfree	0.108439	0.0223726	96	1.6684e-05	0.000422969	Roots
Schleiferiaceae	Germfree	Germfree	0.159619	0.0329464	96	1.68002e-05	0.000422969	Roots
Thermotogaceae	Germfree	Germfree	-0.106611	0.0220413	96	1.72399e-05	0.00042775	Roots
Anaerolineaceae	Germfree	Germfree	-0.0809868	0.0169133	96	2.01837e-05	0.000473558	Roots
Eubacteriales_Family_XIII._Incertae_Sedis	Weeks	Weeks	-0.148461	0.0309391	96	1.95287e-05	0.000473558	Roots
Gemmataceae	Germfree	Germfree	0.136956	0.0285967	96	2.01262e-05	0.000473558	Roots
Rhodospirillaceae	Weeks	Weeks	0.143332	0.0299374	96	2.02235e-05	0.000473558	Roots
Selenomonadaceae	Germfree	Germfree	-0.0721406	0.0150795	96	2.04692e-05	0.000473558	Roots
Candidatus_Deianiraeaceae	Weeks	Weeks	-0.338767	0.0711563	96	2.20624e-05	0.000496985	Roots
Comamonadaceae	Germfree	Germfree	0.245319	0.0515249	96	2.20413e-05	0.000496985	Roots
Methylobacteriaceae	Weeks	Weeks	0.0746634	0.01576	96	2.37957e-05	0.000529068	Roots
Azospirillaceae	Germfree	Germfree	0.061265	0.0137945	96	2.51009e-05	0.000550932	Roots
Thermomonosporaceae	Germfree	Germfree	-0.404782	0.0863047	96	2.77337e-05	0.000601014	Roots
Sphaerochaetaceae	Germfree	Germfree	-0.098957	0.0212286	96	3.04206e-05	0.000651	Roots
Entomoplasmataceae	Germfree	Germfree	0.497287	0.106952	90	3.16077e-05	0.000659906	Roots
Sphingosinicellaceae	Weeks	Weeks	0.118052	0.0253724	96	3.1288e-05	0.000659906	Roots
Kofleriaceae	Weeks	Weeks	-0.17249	0.0371851	96	3.27389e-05	0.000675289	Roots
Hydrogenimonaceae	Weeks	Weeks	-0.207249	0.0449263	96	3.55492e-05	0.000724527	Roots
Actinomycetaceae	Germfree	Germfree	-0.0413644	0.00901109	96	3.82386e-05	0.00077017	Roots
Archangiaceae	Germfree	Germfree	0.597832	0.131021	96	4.1765e-05	0.000821858	Roots
Spongiibacteraceae	Germfree	Germfree	0.0662462	0.0145136	96	4.15613e-05	0.000821858	Roots
Kofleriaceae	Germfree	Germfree	-0.134759	0.0299459	96	5.10572e-05	0.000993294	Roots
Candidatus_Nanosynbacteraceae	Germfree	Germfree	-0.580878	0.129293	96	5.22702e-05	0.00100547	Roots
Pseudonocardiaceae	Germfree	Germfree	-0.0830447	0.0185018	96	5.29886e-05	0.00100796	Roots
Chloroherpetonaceae	Weeks	Weeks	-0.127332	0.0284256	96	5.45284e-05	0.0010147	Roots
Segniliparaceae	Germfree	Germfree	-0.0691109	0.0154215	96	5.41851e-05	0.0010147	Roots
Acidimicrobiaceae	Germfree	Germfree	-0.0984779	0.0220026	96	5.5183e-05	0.00101584	Roots
Baekduiaceae	Weeks	Weeks	0.346117	0.0774817	96	5.67267e-05	0.00103315	Roots
Rhodobacteraceae	Weeks	Weeks	0.0609819	0.0145455	96	6.38874e-05	0.00114653	Roots
Rubrobacteraceae	Germfree	Germfree	-0.0648631	0.0146492	96	6.42913e-05	0.00114653	Roots
Verrucomicrobiaceae	Weeks	Weeks	0.110586	0.0249951	96	6.49984e-05	0.00114719	Roots
Acholeplasmataceae	Germfree	Germfree	0.319232	0.0725261	96	6.98556e-05	0.00121185	Roots
Desulfobulbaceae	Germfree	Germfree	-0.0481652	0.010953	96	7.07856e-05	0.00121185	Roots
Thiovulaceae	Weeks	Weeks	-0.0874406	0.0198765	96	7.03918e-05	0.00121185	Roots
Pelagibacteraceae	Germfree	Germfree	0.131134	0.0301071	96	8.08169e-05	0.00135646	Roots
Streptosporangiaceae	Germfree	Germfree	-0.0635847	0.0145929	96	8.03977e-05	0.00135646	Roots
Egibacteraceae	Germfree	Germfree	-0.0676831	0.0155693	96	8.29888e-05	0.00136507	Roots
Microvenatoraceae	Weeks	Weeks	-0.0946588	0.0217642	96	8.24449e-05	0.00136507	Roots
Saprospiraceae	Germfree	Germfree	0.145078	0.0333941	96	8.3722e-05	0.00136507	Roots
Desulfobacteraceae	Germfree	Germfree	-0.0407285	0.00941143	96	8.83013e-05	0.00142615	Roots
Candidatus_Saccharimonadaceae	Weeks	Weeks	-0.762441	0.176416	96	8.99108e-05	0.00143857	Roots
Amorphaceae	Germfree	Germfree	0.0497158	0.012169	96	9.45673e-05	0.00149907	Roots
Aurantimonadaceae	Germfree	Germfree	0.0571707	0.0133581	96	0.000102624	0.00157274	Roots
Mycoplasmataceae	Germfree	Germfree	0.31593	0.0737763	96	0.000101846	0.00157274	Roots
Nitrosomonadaceae	Germfree	Germfree	-0.289655	0.0676917	96	0.000102889	0.00157274	Roots
Opitutaceae	Weeks	Weeks	0.275201	0.0641857	96	0.000100159	0.00157274	Roots
Syntrophotaleaceae	Germfree	Germfree	-0.0678113	0.0159634	96	0.000113454	0.00171889	Roots
Gloeobacteraceae	Germfree	Germfree	-0.0510816	0.0120697	96	0.000119183	0.00178984	Roots
Francisellaceae	Germfree	Germfree	0.156736	0.037323	96	0.000132057	0.00196593	Roots
Moraxellaceae	Germfree	Germfree	-0.862863	0.205826	96	0.000135078	0.00199357	Roots
Anaerohalosphaeraceae	Weeks	Weeks	-0.0972423	0.0233422	96	0.000146613	0.00214532	Roots
Geminocystaceae	Germfree	Germfree	0.21126	0.0507612	96	0.0001485	0.0021545	Roots
Euzebyaceae	Germfree	Germfree	-0.0589104	0.0142235	96	0.000158079	0.00224821	Roots
Melioribacteraceae	Germfree	Germfree	-0.221032	0.0533879	96	0.000158898	0.00224821	Roots
Microbulbiferaceae	Germfree	Germfree	0.0442039	0.0112127	96	0.000158278	0.00224821	Roots
Tenuifilaceae	Germfree	Germfree	-0.26495	0.0640857	96	0.000161794	0.00227042	Roots
Intrasporangiaceae	Germfree	Germfree	-0.069318	0.0169145	96	0.000181021	0.00251957	Roots
Methylophilaceae	Germfree	Germfree	0.392497	0.0960819	96	0.000188529	0.00260292	Roots
Catenulisporaceae	Germfree	Germfree	-0.0591832	0.0145554	96	0.000199915	0.00273803	Roots
Pseudanabaenaceae	Germfree	Germfree	-0.0981714	0.0242141	96	0.000207318	0.0028169	Roots
Dermabacteraceae	Germfree	Germfree	-0.044452	0.0110108	96	0.000218603	0.00294544	Roots
Desulfitobacteriaceae	Germfree	Germfree	-0.104393	0.0258736	96	0.00022022	0.00294544	Roots
Nocardiopsaceae	Germfree	Germfree	-0.0423598	0.0105068	96	0.000222339	0.00295074	Roots
Puniceicoccaceae	Germfree	Germfree	-0.110973	0.0275509	96	0.000224872	0.00296139	Roots
Neisseriaceae	Weeks	Weeks	-0.0610605	0.0151844	96	0.000229566	0.00300013	Roots
Syntrophaceae	Weeks	Weeks	-0.0760051	0.0189575	96	0.000238225	0.0030897	Roots
Chloroflexaceae	Germfree	Germfree	-0.0846583	0.0211644	96	0.000245059	0.00313091	Roots
Rhizobiaceae	Weeks	Weeks	0.25503	0.0637408	96	0.000244288	0.00313091	Roots
Rickettsiaceae	Weeks	Weeks	-0.181151	0.0453778	96	0.000251128	0.00318467	Roots
Fulvivirgaceae	Germfree	Germfree	0.102965	0.0258846	96	0.000262342	0.00328812	Roots
Thermosynechococcaceae	Weeks	Weeks	-0.088607	0.0222806	96	0.000263126	0.00328812	Roots
Iamiaceae	Germfree	Germfree	0.229382	0.0581774	96	0.000292059	0.00362322	Roots
Caulobacteraceae	Weeks	Weeks	0.326492	0.0829291	96	0.000297276	0.00366142	Roots
Zooshikellaceae	Germfree	Germfree	0.156329	0.0398139	96	0.000306987	0.00375401	Roots
Synergistaceae	Germfree	Germfree	-0.0436997	0.0111467	96	0.000312733	0.00379716	Roots
Leptospiraceae	Germfree	Germfree	0.452918	0.115684	96	0.000317801	0.00382421	Roots
Sphingomonadaceae	Weeks	Weeks	0.20882	0.0533595	96	0.000319429	0.00382421	Roots
Eggerthellaceae	Germfree	Germfree	-0.0451254	0.0115416	96	0.000322999	0.0038401	Roots
Brachyspiraceae	Germfree	Germfree	0.284062	0.0729058	96	0.000336582	0.00394677	Roots
Myxococcaceae	Germfree	Germfree	0.415967	0.106709	96	0.000334667	0.00394677	Roots
Marinilabiliaceae	Germfree	Germfree	-0.207606	0.0533234	96	0.00033961	0.00395519	Roots
Holosporaceae	Germfree	Germfree	0.0848877	0.0218627	96	0.000350712	0.00401813	Roots
Jiangellaceae	Germfree	Germfree	-0.0627242	0.0161662	96	0.000353726	0.00401813	Roots
Miltoncostaeaceae	Germfree	Germfree	-0.117594	0.030313	96	0.000354403	0.00401813	Roots
Sphaerotilaceae	Germfree	Germfree	0.229383	0.0590582	96	0.000349395	0.00401813	Roots
Candidatus_Saccharimonadaceae	Germfree	Germfree	-0.547488	0.142071	96	0.000383163	0.00431563	Roots
Ornithinimicrobiaceae	Germfree	Germfree	-0.0514974	0.0134792	96	0.000423548	0.0047393	Roots
Candidatus_Paracaedibacteraceae	Germfree	Germfree	0.158171	0.0414557	96	0.000430106	0.00478144	Roots
Nakamurellaceae	Germfree	Germfree	-0.0645379	0.0169291	96	0.000434247	0.00479633	Roots
Roseiflexaceae	Germfree	Germfree	-0.0789355	0.0207991	96	0.000457216	0.00501765	Roots
Symbiobacteriaceae	Germfree	Germfree	-0.0653443	0.0172992	96	0.000482468	0.00526105	Roots
Desulfomicrobiaceae	Germfree	Germfree	-0.0471277	0.0124925	96	0.000489517	0.00527077	Roots
Sandaracinaceae	Germfree	Germfree	-0.11223	0.0297489	96	0.000489343	0.00527077	Roots
Caldilineaceae	Germfree	Germfree	-0.075416	0.0200023	96	0.000492621	0.00527105	Roots
Bacillales_Family_X._Incertae_Sedis	Germfree	Germfree	-0.0852441	0.022638	96	0.00049983	0.00531496	Roots
Fervidobacteriaceae	Germfree	Germfree	0.144589	0.0385805	96	0.000527266	0.00552894	Roots
Microvenatoraceae	Germfree	Germfree	-0.0656606	0.0175271	96	0.000529641	0.00552894	Roots
Roseobacteraceae	Weeks	Weeks	0.056232	0.0150088	96	0.000529052	0.00552894	Roots
Sphingomonadaceae	Germfree	Germfree	0.160581	0.0429714	96	0.000544616	0.0056508	Roots
Colwelliaceae	Germfree	Germfree	0.104739	0.0280653	96	0.000552727	0.00569705	Roots
Crocinitomicaceae	Weeks	Weeks	-0.138245	0.0370614	96	0.000555729	0.00569705	Roots
Ktedonosporobacteraceae	Weeks	Weeks	-0.419892	0.112955	96	0.000577463	0.00588463	Roots
Jonesiaceae	Germfree	Germfree	-0.0968683	0.0261113	96	0.000590567	0.00598254	Roots
Moritellaceae	Germfree	Germfree	0.117587	0.0317544	96	0.000602707	0.00603412	Roots
Paraconexibacteraceae	Weeks	Weeks	0.180045	0.0486082	96	0.000600926	0.00603412	Roots
Sphingosinicellaceae	Germfree	Germfree	0.0750353	0.0204329	96	0.00066047	0.00657398	Roots
Stappiaceae	Weeks	Weeks	0.067603	0.0184325	96	0.000669712	0.00662744	Roots
Conexibacteraceae	Germfree	Germfree	-0.148203	0.0404354	96	0.000674558	0.00663703	Roots
Tichowtungiaceae	Germfree	Germfree	-0.0641218	0.017523	96	0.000686449	0.00671543	Roots
Candidatus_Nanosynbacteraceae	Weeks	Weeks	-0.587021	0.160548	96	0.000692465	0.0067358	Roots
Egicoccaceae	Germfree	Germfree	-0.0442694	0.0121602	96	0.000725736	0.00701955	Roots
Phreatobacteraceae	Weeks	Weeks	0.0669121	0.0184002	96	0.000734485	0.00706426	Roots
Hydrogenimonaceae	Germfree	Germfree	-0.131411	0.03618	96	0.000743979	0.0071156	Roots
Borreliaceae	Germfree	Germfree	0.273044	0.0753032	96	0.0007578	0.00720752	Roots
Isosphaeraceae	Weeks	Weeks	-0.203458	0.0563301	96	0.000789873	0.00747107	Roots
Cytophagaceae	Germfree	Germfree	0.319192	0.089003	96	0.000851754	0.00801211	Roots
Stellaceae	TET_density	TET_density	0.611134	0.172115	96	0.000945598	0.00884625	Roots
Petrotogaceae	Germfree	Germfree	0.133172	0.0378181	96	0.00103035	0.00958671	Roots
Methylacidiphilaceae	Weeks	Weeks	-0.106302	0.0302666	96	0.00105838	0.00979431	Roots
Breoghaniaceae	Weeks	Weeks	0.0604765	0.0173174	96	0.00112177	0.0102269	Roots
Rhodanobacteraceae	Germfree	Germfree	-0.165505	0.0473868	96	0.00112046	0.0102269	Roots
Streptomycetaceae	Weeks	Weeks	-0.163396	0.0467938	96	0.00112305	0.0102269	Roots
Sphingobacteriaceae	Germfree	Germfree	0.213046	0.061061	96	0.00113218	0.0102555	Roots
Actinopolymorphaceae	Germfree	Germfree	-0.0810475	0.0232607	96	0.00114789	0.0103431	Roots
Stellaceae	TET_density_Weeks	TET_density_Weeks	-0.612342	0.175965	96	0.0011627	0.0104217	Roots
Maricaulaceae	Weeks	Weeks	0.0739949	0.0213001	96	0.00118313	0.0105055	Roots
Trueperaceae	Germfree	Germfree	-0.0655905	0.0188827	96	0.00118432	0.0105055	Roots
Thermoactinomycetaceae	Weeks	Weeks	-0.0562742	0.016267	96	0.00123396	0.0108336	Roots
Thermoanaerobacteraceae	Germfree	Germfree	-0.0394293	0.0113946	96	0.00123059	0.0108336	Roots
Propionibacteriaceae	Germfree	Germfree	-0.0478925	0.0138907	96	0.00127608	0.0111462	Roots
Nannocystaceae	Germfree	Germfree	-0.0606815	0.0176102	96	0.00128349	0.011154	Roots
Clostridiales_Family_XVII._Incertae_Sedis	Germfree	Germfree	-0.048725	0.0141985	96	0.0013369	0.0115014	Roots
Hydrogenophilaceae	Germfree	Germfree	-0.0791676	0.023066	96	0.00133494	0.0115014	Roots
Cardiobacteriaceae	Weeks	Weeks	0.0524116	0.0152938	96	0.00135527	0.0116011	Roots
Ruaniaceae	Germfree	Germfree	-0.0581959	0.0170441	96	0.00140519	0.0119686	Roots
Cyclobacteriaceae	Weeks	Weeks	-0.0983183	0.0288296	96	0.00142195	0.0120514	Roots
Endozoicomonadaceae	Germfree	Germfree	0.0577425	0.0169621	96	0.00144717	0.0121064	Roots
Kytococcaceae	Germfree	Germfree	-0.0674128	0.0198161	96	0.00145673	0.0121064	Roots
Phreatobacteraceae	TET_density	TET_density	0.509312	0.149644	96	0.0014502	0.0121064	Roots
Sandaracinaceae	Weeks	Weeks	-0.125837	0.0369405	96	0.00143776	0.0121064	Roots
Prochlorotrichaceae	Weeks	Weeks	0.0808496	0.0238556	96	0.00151134	0.0124996	Roots
Parachlamydiaceae	Germfree	Germfree	0.265382	0.0783442	96	0.00151886	0.0125014	Roots
Alteromonadaceae	Germfree	Germfree	0.0711141	0.0210457	96	0.0015557	0.0127434	Roots
Desulfosudaceae	Germfree	Germfree	-0.058701	0.0174111	96	0.00158984	0.012961	Roots
Gemmataceae	Weeks	Weeks	0.119202	0.0355097	96	0.00165752	0.0134487	Roots
Amorphaceae	TET_density	TET_density	0.397572	0.122892	96	0.00169556	0.0136924	Roots
Alcanivoracaceae	Weeks	Weeks	0.0741057	0.0229179	96	0.00170416	0.0136973	Roots
Acidithiobacillaceae	Weeks	Weeks	-0.0488291	0.0146091	96	0.00172762	0.013821	Roots
Kiloniellaceae	Germfree	Germfree	0.0523842	0.0157338	96	0.00179276	0.0141875	Roots
Labilitrichaceae	Germfree	Germfree	-0.202608	0.0608429	96	0.00178963	0.0141875	Roots
Paraconexibacteraceae	Germfree	Germfree	-0.130288	0.0391451	96	0.0017983	0.0141875	Roots
Dietziaceae	Weeks	Weeks	0.0473385	0.0142573	96	0.00183981	0.0144484	Roots
Arcobacteraceae	Germfree	Germfree	0.207089	0.0624257	96	0.00185521	0.0145028	Roots
Budviciaceae	Germfree	Germfree	0.0446824	0.0134951	96	0.00188906	0.0147003	Roots
Devosiaceae	Weeks	Weeks	0.133292	0.040323	96	0.00191832	0.0148536	Roots
Tepidisphaeraceae	Weeks	Weeks	0.109243	0.0330623	96	0.00192611	0.0148536	Roots
Amorphaceae	TET_density_Weeks	TET_density_Weeks	-0.399776	0.12564	96	0.00200196	0.0153693	Roots
Leptotrichiaceae	Germfree	Germfree	0.199717	0.0609097	96	0.00206899	0.015813	Roots
Selenomonadaceae	Weeks	Weeks	-0.0613535	0.0187249	96	0.00208272	0.0158472	Roots
Anaeromyxobacteraceae	Germfree	Germfree	-0.0779313	0.0238116	96	0.0021048	0.0159443	Roots
Beutenbergiaceae	Germfree	Germfree	-0.0861815	0.026346	96	0.00211486	0.0159499	Roots
Phreatobacteraceae	TET_density_Weeks	TET_density_Weeks	-0.49977	0.152991	96	0.00214185	0.0160187	Roots
Tepidisphaeraceae	Germfree	Germfree	0.0869732	0.0266257	96	0.00214269	0.0160187	Roots
Parvularculaceae	Weeks	Weeks	0.0645528	0.0198969	96	0.00228072	0.0169765	Roots
Vallitaleaceae	Weeks	Weeks	-0.13509	0.0430898	96	0.00231345	0.0171456	Roots
Mariprofundaceae	Germfree	Germfree	-0.0486333	0.015028	96	0.00233371	0.0172211	Roots
Aeromonadaceae	Weeks	Weeks	0.0541339	0.0172962	96	0.00235112	0.0172752	Roots
Halothiobacillaceae	Germfree	Germfree	-0.0474051	0.0146885	96	0.0023923	0.0173788	Roots
Marinifilaceae	Germfree	Germfree	-0.16787	0.0519762	96	0.00237634	0.0173788	Roots
Thermoactinomycetaceae	Germfree	Germfree	-0.0422723	0.0131001	96	0.00239568	0.0173788	Roots
Chitinophagaceae	Germfree	Germfree	-0.175611	0.0545645	96	0.00245315	0.0177206	Roots
Geodermatophilaceae	Germfree	Germfree	-0.0489465	0.0152166	96	0.00246521	0.017733	Roots
Bernardetiaceae	Weeks	Weeks	-0.157609	0.0490244	96	0.00247731	0.0177454	Roots
Casimicrobiaceae	Germfree	Germfree	-0.0724217	0.0225873	96	0.00253773	0.0181025	Roots
Methylocystaceae	Germfree	Germfree	-0.0806728	0.0251753	96	0.00255099	0.0181215	Roots
Phyllobacteriaceae	TET_density	TET_density	1.04119	0.325686	96	0.00260531	0.018431	Roots
Pleomorphomonadaceae	Germfree	Germfree	0.0459895	0.0144014	96	0.00263094	0.0185356	Roots
Campylobacteraceae	Germfree	Germfree	0.121433	0.0380898	96	0.00267042	0.0186433	Roots
Methylobacteriaceae	TET_density	TET_density	0.408676	0.128172	96	0.00266714	0.0186433	Roots
Sinobacteraceae	Germfree	Germfree	0.24842	0.0779496	96	0.00267888	0.0186433	Roots
Breoghaniaceae	TET_density	TET_density	0.446667	0.140838	96	0.00279657	0.0193835	Roots
Pleomorphomonadaceae	TET_density	TET_density	0.460978	0.145437	96	0.00281128	0.0194069	Roots
Kangiellaceae	Weeks	Weeks	-0.0898924	0.0284317	96	0.00287388	0.0197593	Roots
Marivirgaceae	Germfree	Germfree	0.119769	0.0380322	96	0.00297577	0.020378	Roots
Actinopolysporaceae	Germfree	Germfree	-0.0501065	0.0159637	96	0.00306251	0.0208885	Roots
Pseudanabaenaceae	Weeks	Weeks	-0.094035	0.0300677	96	0.00316004	0.0214682	Roots
Chitinophagaceae	Weeks	Weeks	-0.211275	0.0677551	96	0.00324156	0.021935	Roots
Nitrobacteraceae	TET_density	TET_density	1.34741	0.434295	96	0.00338499	0.0228153	Roots
Cellvibrionaceae	Germfree	Germfree	0.048201	0.0155808	96	0.00346889	0.0232892	Roots
Chlorobiaceae	Weeks	Weeks	-0.038133	0.0123346	96	0.00348856	0.0233297	Roots
Reichenbachiellaceae	Germfree	Germfree	0.0914932	0.0296319	96	0.00352616	0.0234894	Roots
Cyclobacteriaceae	Germfree	Germfree	0.0713867	0.023217	96	0.00365317	0.0241236	Roots
Prochlorococcaceae	Germfree	Germfree	0.0370917	0.0120656	96	0.00365896	0.0241236	Roots
Thalassobaculaceae	Germfree	Germfree	0.049584	0.0161316	96	0.00366363	0.0241236	Roots
Sedimentisphaeraceae	TET_density	TET_density	-0.451525	0.151583	96	0.0037102	0.0243367	Roots
Capillimicrobiaceae	Weeks	Weeks	0.131091	0.0427492	96	0.0037366	0.0244155	Roots
Methylobacteriaceae	TET_density_Weeks	TET_density_Weeks	-0.401651	0.131039	96	0.00375075	0.0244155	Roots
Desulfitobacteriaceae	Weeks	Weeks	-0.0983866	0.0321284	96	0.00377997	0.0245125	Roots
Bruguierivoracaceae	Germfree	Germfree	0.029489	0.00963727	96	0.00380492	0.0245812	Roots
Alicyclobacillaceae	Germfree	Germfree	-0.0397855	0.0130332	96	0.00388133	0.0248878	Roots
Breoghaniaceae	TET_density_Weeks	TET_density_Weeks	-0.439341	0.143988	96	0.00389599	0.0248878	Roots
Promicromonosporaceae	Germfree	Germfree	-0.0845055	0.0276855	96	0.0038843	0.0248878	Roots
Chelatococcaceae	Weeks	Weeks	0.0588011	0.0193819	96	0.00408554	0.0260016	Roots
Gallionellaceae	Germfree	Germfree	-0.0668366	0.0221064	96	0.00420285	0.0266492	Roots
Weeksellaceae	Weeks	Weeks	-0.138703	0.045906	96	0.0042252	0.0266921	Roots
Akkermansiaceae	Weeks	Weeks	0.0624294	0.0207731	96	0.00441448	0.0277852	Roots
Rhizobiaceae	Germfree	Germfree	0.15378	0.0513317	96	0.00452936	0.0283002	Roots
Xanthomonadaceae	Germfree	Germfree	-0.0762497	0.0254457	96	0.00452016	0.0283002	Roots
Chelatococcaceae	TET_density	TET_density	0.471655	0.157628	96	0.0045738	0.028474	Roots
Thalassospiraceae	Weeks	Weeks	0.0513818	0.0171847	96	0.00460149	0.0285425	Roots
Acidobacteriaceae	Germfree	Germfree	-0.158187	0.0532404	96	0.0048407	0.029918	Roots
Halobacteriovoraceae	Germfree	Germfree	0.12229	0.0412395	96	0.00491723	0.0302817	Roots
Syntrophotaleaceae	Weeks	Weeks	-0.0586645	0.0198225	96	0.00499549	0.0306534	Roots
Erythrobacteraceae	TET_density	TET_density	-0.775468	0.262399	96	0.00505207	0.0308898	Roots
Endozoicomonadaceae	Weeks	Weeks	-0.062187	0.0210625	96	0.00509034	0.0309031	Roots
Thermaceae	Germfree	Germfree	-0.0312271	0.0105731	96	0.00507738	0.0309031	Roots
Rikenellaceae	Germfree	Germfree	0.0418835	0.0142063	96	0.00514881	0.0311475	Roots
Saccharospirillaceae	TET_density	TET_density	-0.369716	0.129118	96	0.00520227	0.0313602	Roots
Fluviibacteraceae	Germfree	Germfree	-0.0770013	0.0262343	96	0.00533283	0.0320344	Roots
Pleomorphomonadaceae	TET_density_Weeks	TET_density_Weeks	-0.433274	0.14869	96	0.00564349	0.033782	Roots
Acidothermaceae	Germfree	Germfree	-0.0864043	0.0297635	96	0.00581008	0.0345061	Roots
Gemmatimonadaceae	Weeks	Weeks	-0.0956151	0.0329385	96	0.00581305	0.0345061	Roots
Kribbellaceae	Weeks	Weeks	-0.421336	0.145184	96	0.00582492	0.0345061	Roots
Sedimentisphaeraceae	Weeks	Weeks	-0.0525046	0.0186386	96	0.00594508	0.0350964	Roots
Chloroherpetonaceae	Germfree	Germfree	-0.066182	0.0228917	96	0.00599751	0.0352173	Roots
Rhodospirillaceae	TET_density	TET_density	0.703763	0.243473	96	0.0060067	0.0352173	Roots
Vulgatibacteraceae	Germfree	Germfree	-0.0677082	0.023523	96	0.00620325	0.0362456	Roots
Oceanospirillaceae	Germfree	Germfree	0.0387761	0.013512	96	0.00634664	0.0369573	Roots
Moritellaceae	Weeks	Weeks	-0.11304	0.0394308	96	0.00639655	0.0371217	Roots
Rhodothermaceae	Germfree	Germfree	-0.0372338	0.0129951	96	0.00642336	0.0371513	Roots
Acidobacteriaceae	Weeks	Weeks	-0.189247	0.0661109	96	0.00646833	0.0372855	Roots
Erythrobacteraceae	TET_density_Weeks	TET_density_Weeks	0.765279	0.268268	96	0.00663973	0.03798	Roots
Leptospiraceae	Weeks	Weeks	0.409905	0.14365	96	0.00662512	0.03798	Roots
Litoricolaceae	Germfree	Germfree	-0.0473456	0.0170472	96	0.00665538	0.03798	Roots
Rhodobacteraceae	Germfree	Germfree	0.0325139	0.0117138	96	0.00668625	0.0380294	Roots
Nitrobacteraceae	TET_density_Weeks	TET_density_Weeks	-1.26479	0.444009	96	0.00671185	0.0380487	Roots
Staphylococcaceae	Germfree	Germfree	0.13084	0.0460627	96	0.00685658	0.0387408	Roots
Bacillaceae	Weeks	Weeks	0.12005	0.0423226	96	0.00692763	0.0390095	Roots
Candidatus_Uabimicrobiaceae	Weeks	Weeks	-0.105773	0.0382957	96	0.00694971	0.0390095	Roots
Rhodospirillaceae	Germfree	Germfree	0.0682158	0.0241092	96	0.00705809	0.0394884	Roots
Fusobacteriaceae	Germfree	Germfree	0.144428	0.0511545	96	0.00717176	0.0399936	Roots
Rhodanobacteraceae	Weeks	Weeks	-0.165393	0.0588423	96	0.00741224	0.0412005	Roots
Elioraeaceae	Germfree	Germfree	0.0540768	0.0192566	96	0.00746184	0.041342	Roots
Bradymonadaceae	Germfree	Germfree	-0.0371724	0.0132919	96	0.00769199	0.0424659	Roots
Capillimicrobiaceae	Germfree	Germfree	-0.0962399	0.0344268	96	0.00771431	0.0424659	Roots
Chelatococcaceae	TET_density_Weeks	TET_density_Weeks	-0.450043	0.161154	96	0.0077722	0.0426475	Roots
Gallionellaceae	Weeks	Weeks	-0.0764466	0.0274505	96	0.0079307	0.0433782	Roots
Desulfohalobiaceae	Germfree	Germfree	-0.0562239	0.0201981	96	0.00795692	0.043383	Roots
Coxiellaceae	Weeks	Weeks	0.0988418	0.0355622	96	0.0080447	0.0437223	Roots
Bogoriellaceae	Germfree	Germfree	-0.0579868	0.0209283	96	0.00822803	0.0445771	Roots
Clostridiaceae	Germfree	Germfree	0.11638	0.0432381	96	0.00846242	0.0455587	Roots
Dietziaceae	Germfree	Germfree	-0.0316886	0.0114817	96	0.00846203	0.0455587	Roots
Pirellulaceae	Weeks	Weeks	-0.0762662	0.027781	96	0.00878946	0.047171	Roots
Simkaniaceae	Germfree	Germfree	0.274815	0.100174	96	0.00883271	0.047255	Roots
Opitutaceae	Germfree	Germfree	-0.140994	0.0516899	96	0.00919729	0.0490522	Roots
Metamycoplasmataceae	Germfree	Germfree	0.188216	0.069055	96	0.00924719	0.0491652	Roots
Vibrionaceae	Germfree	Germfree	0.0503433	0.0184954	96	0.00933448	0.0494756	Roots
Phyllobacteriaceae	TET_density_Weeks	TET_density_Weeks	-0.905326	0.332971	96	0.00940686	0.0497054	Roots
Polyangiaceae	Germfree	Germfree	-0.102578	0.0378372	96	0.00959964	0.0505679	Roots
Peptoniphilaceae	Germfree	Germfree	0.110135	0.0406481	96	0.00963847	0.0506168	Roots
Candidatus_Uabimicrobiaceae	Germfree	Germfree	0.0813651	0.0308402	96	0.00980152	0.0511591	Roots
Corynebacteriaceae	Germfree	Germfree	-0.0308438	0.011688	96	0.00978411	0.0511591	Roots
Flavobacteriaceae	Germfree	Germfree	0.0795079	0.0296393	96	0.0103268	0.053737	Roots
Xanthomonadaceae	Weeks	Weeks	-0.0844685	0.0315971	96	0.0105726	0.0548493	Roots
Saccharospirillaceae	TET_density_Weeks	TET_density_Weeks	0.343891	0.132006	96	0.010728	0.0554875	Roots
Coriobacteriaceae	Germfree	Germfree	-0.0774495	0.0290789	96	0.0108418	0.0557391	Roots
Muribaculaceae	Germfree	Germfree	0.0895373	0.0336039	96	0.0108125	0.0557391	Roots
Salinivirgaceae	Germfree	Germfree	-0.0948217	0.0357242	96	0.0110968	0.0568796	Roots
Mariprofundaceae	Weeks	Weeks	-0.0494253	0.0186609	96	0.0112573	0.0575301	Roots
Fimbriimonadaceae	Germfree	Germfree	-0.0798907	0.0301938	96	0.0113342	0.057601	Roots
Kiloniellaceae	Weeks	Weeks	0.0516914	0.0195373	96	0.0113385	0.057601	Roots
Elioraeaceae	TET_density	TET_density	0.513988	0.194468	96	0.011417	0.0578283	Roots
Conexibacteraceae	Weeks	Weeks	0.132526	0.0502105	96	0.0115227	0.0581916	Roots
Rhodospirillaceae	TET_density_Weeks	TET_density_Weeks	-0.654705	0.248919	96	0.0117945	0.059389	Roots
Burkholderiaceae	Germfree	Germfree	0.243294	0.0928596	96	0.0121011	0.0605052	Roots
Caedimonadaceae	Germfree	Germfree	0.100598	0.0384186	96	0.0121486	0.0605052	Roots
Glycomycetaceae	Germfree	Germfree	-0.0344904	0.0131735	96	0.0121576	0.0605052	Roots
Sphaerobacteraceae	Germfree	Germfree	-0.0669694	0.0255614	96	0.0121033	0.0605052	Roots
Alicyclobacillaceae	Weeks	Weeks	-0.0422903	0.0161839	96	0.0123138	0.0611048	Roots
Vicinamibacteraceae	Weeks	Weeks	-0.162395	0.0622243	96	0.0124155	0.0614314	Roots
Thalassobaculaceae	TET_density	TET_density	0.423039	0.16291	96	0.0128296	0.0632976	Roots
Atopobiaceae	Germfree	Germfree	-0.0357025	0.0137879	96	0.0130686	0.0642915	Roots
Geodermatophilaceae	Weeks	Weeks	0.0488515	0.0188951	96	0.0132	0.0647521	Roots
Sedimentisphaeraceae	TET_density_Weeks	TET_density_Weeks	0.390656	0.154973	96	0.0134503	0.0657912	Roots
Elioraeaceae	TET_density_Weeks	TET_density_Weeks	-0.511985	0.198817	96	0.0135428	0.0658671	Roots
Thermoguttaceae	Germfree	Germfree	0.06628	0.0257347	96	0.0135306	0.0658671	Roots
Paenibacillaceae	Weeks	Weeks	-0.22812	0.0886738	96	0.0136303	0.0661051	Roots
Gemmatimonadaceae	Germfree	Germfree	-0.0681451	0.026526	96	0.0137525	0.0665093	Roots
Lichenihabitantaceae	TET_density	TET_density	0.47078	0.18357	96	0.0139047	0.0669185	Roots
Nitrospiraceae	Germfree	Germfree	-0.0453541	0.0176869	96	0.0139153	0.0669185	Roots
Chthonomonadaceae	Weeks	Weeks	0.0648484	0.0253103	96	0.0139895	0.066995	Roots
Kribbellaceae	Germfree	Germfree	-0.299497	0.11692	96	0.0140095	0.066995	Roots
Methylophilaceae	TET_density	TET_density	-2.47687	0.970309	96	0.0143231	0.0683042	Roots
Flammeovirgaceae	Germfree	Germfree	0.100185	0.0393	96	0.0144454	0.0683164	Roots
Haliscomenobacteraceae	Germfree	Germfree	0.0534182	0.0209533	96	0.0144399	0.0683164	Roots
Thermotogaceae	Weeks	Weeks	-0.0697737	0.0273697	96	0.014443	0.0683164	Roots
Thalassobaculaceae	TET_density_Weeks	TET_density_Weeks	-0.424221	0.166554	96	0.0145238	0.0684979	Roots
Sulfuricellaceae	Germfree	Germfree	-0.0301454	0.0118408	96	0.0145655	0.0685057	Roots
Marinifilaceae	Weeks	Weeks	-0.164009	0.0645411	96	0.0147381	0.0691275	Roots
Roseiflexaceae	Weeks	Weeks	-0.0653647	0.0258271	96	0.0151186	0.0707187	Roots
Bifidobacteriaceae	Germfree	Germfree	-0.0379133	0.0153267	96	0.0152285	0.0710387	Roots
Chroococcaceae	Germfree	Germfree	0.12697	0.0504441	96	0.015643	0.0727481	Roots
Hyphomicrobiaceae	TET_density	TET_density	0.692502	0.27523	96	0.0156799	0.0727481	Roots
Sulfurospirillaceae	Weeks	Weeks	-0.0897668	0.0358219	96	0.0160774	0.0743907	Roots
Methylophilaceae	TET_density_Weeks	TET_density_Weeks	2.48446	0.992013	96	0.016135	0.0744559	Roots
Other	Germfree	Germfree	0.0485145	0.0194176	96	0.0163742	0.0753564	Roots
Aurantimonadaceae	TET_density	TET_density	0.335661	0.1349	96	0.0167916	0.0770703	Roots
Paludibacteraceae	Germfree	Germfree	-0.126575	0.0509376	96	0.0169285	0.0774911	Roots
Peptococcaceae	Weeks	Weeks	-0.0384445	0.0154886	96	0.0170444	0.0778135	Roots
Hyphomicrobiaceae	TET_density_Weeks	TET_density_Weeks	-0.695063	0.281386	96	0.01755	0.0799085	Roots
Chlamydiaceae	Germfree	Germfree	0.3204	0.12977	92	0.0176001	0.079924	Roots
Thermoanaerobacteraceae	Weeks	Weeks	-0.0348415	0.0141491	96	0.0178825	0.0809918	Roots
Flavobacteriaceae	Weeks	Weeks	-0.0900584	0.0368044	96	0.0185689	0.0838786	Roots
Leptolyngbyaceae	Weeks	Weeks	-0.0374648	0.0153458	96	0.0188218	0.0847972	Roots
Prochlorococcaceae	Weeks	Weeks	0.0363286	0.0149824	96	0.0195936	0.0880425	Roots
Carnobacteriaceae	Weeks	Weeks	-0.138778	0.057429	96	0.0199871	0.0895756	Roots
Eubacteriales_Family_XIII._Incertae_Sedis	Germfree	Germfree	-0.0601749	0.0249158	96	0.0200541	0.0896412	Roots
Erwiniaceae	Germfree	Germfree	0.0401563	0.0169943	96	0.0202604	0.0903275	Roots
Lichenihabitantaceae	TET_density_Weeks	TET_density_Weeks	-0.451305	0.187676	96	0.0205639	0.0914425	Roots
Hyphomicrobiaceae	Weeks	Weeks	0.0813335	0.0338422	96	0.0206323	0.0915089	Roots
Kordiimonadaceae	Weeks	Weeks	-0.034603	0.0147137	96	0.0208428	0.0917391	Roots
Other	TET_density	TET_density	0.470439	0.196094	96	0.0208449	0.0917391	Roots
Spiroplasmataceae	Germfree	Germfree	0.263913	0.109958	96	0.0207902	0.0917391	Roots
Blastochloridaceae	TET_density	TET_density	0.510179	0.21291	96	0.0209868	0.0918912	Roots
Litoricolaceae	Weeks	Weeks	-0.0497273	0.0211683	96	0.0209806	0.0918912	Roots
Ardenticatenaceae	Weeks	Weeks	-0.0575527	0.0240639	96	0.021217	0.0921918	Roots
Lacipirellulaceae	Germfree	Germfree	0.0654338	0.0273502	96	0.0211776	0.0921918	Roots
Prolixibacteraceae	Weeks	Weeks	-0.12696	0.0530466	96	0.0211309	0.0921918	Roots
Polyangiaceae	TET_density	TET_density	0.909906	0.382109	96	0.0217514	0.0942742	Roots
Simkaniaceae	Weeks	Weeks	-0.296021	0.124391	96	0.0218299	0.0943757	Roots
Alcaligenaceae	Germfree	Germfree	0.154569	0.0649891	96	0.0219021	0.0944364	Roots
Jatrophihabitantaceae	Germfree	Germfree	-0.113898	0.0479089	96	0.0219542	0.0944364	Roots
Desulfomicrobiaceae	Weeks	Weeks	0.0368382	0.0155125	96	0.0220934	0.0947966	Roots
Aurantimonadaceae	TET_density_Weeks	TET_density_Weeks	-0.327119	0.137918	96	0.0222465	0.0952149	Roots
Morganellaceae	Weeks	Weeks	0.098611	0.0416078	96	0.0223439	0.0953934	Roots
Alcanivoracaceae	Germfree	Germfree	0.0428672	0.0184562	96	0.0224284	0.095516	Roots
Piscirickettsiaceae	Weeks	Weeks	-0.048025	0.0203191	96	0.022691	0.0963944	Roots
Psychromonadaceae	Weeks	Weeks	-0.0784299	0.0339002	96	0.0229449	0.0971326	Roots
Veillonellaceae	Germfree	Germfree	-0.0529847	0.0224678	96	0.0229782	0.0971326	Roots
Candidatus_Babeliaceae	Germfree	Germfree	0.161608	0.0701332	96	0.0234818	0.0990168	Roots
Dysgonomonadaceae	Weeks	Weeks	-0.107266	0.0457055	96	0.0236054	0.0992933	Roots
Puniceicoccaceae	Weeks	Weeks	0.0802139	0.0342111	96	0.0237303	0.0993369	Roots
Treponemataceae	Weeks	Weeks	-0.0618439	0.0263766	96	0.0237318	0.0993369	Roots
Marinilabiliaceae	Weeks	Weeks	-0.155118	0.066214	96	0.0238428	0.0995581	Roots
Oxalobacteraceae	Germfree	Germfree	-0.362408	0.155516	96	0.024548	0.102254	Roots
Vallitaleaceae	Germfree	Germfree	0.0792519	0.034701	96	0.024707	0.102666	Roots
Hydrogenophilaceae	Weeks	Weeks	-0.0665214	0.028642	96	0.0250065	0.103659	Roots
Blastochloridaceae	TET_density_Weeks	TET_density_Weeks	-0.504301	0.217672	96	0.0253455	0.104811	Roots
Nannocystaceae	Weeks	Weeks	-0.0506042	0.0218673	96	0.0255036	0.10521	Roots
Sulfurovaceae	Germfree	Germfree	-0.0380701	0.0164719	96	0.0256802	0.105684	Roots
Sanguibacteraceae	Germfree	Germfree	-0.0589286	0.0256517	96	0.0265342	0.108937	Roots
Gomontiellaceae	Germfree	Germfree	-0.0836215	0.0365074	96	0.0269554	0.110401	Roots
Fibrobacteraceae	TET_density	TET_density	-0.414979	0.184646	96	0.0270294	0.11044	Roots
Lichenihabitantaceae	Weeks	Weeks	0.0514041	0.0225718	96	0.027797	0.113306	Roots
Polyangiaceae	TET_density_Weeks	TET_density_Weeks	-0.886344	0.390656	96	0.0283526	0.115296	Roots
Marivirgaceae	Weeks	Weeks	-0.106695	0.0472262	96	0.028994	0.117625	Roots
Rivulariaceae	Germfree	Germfree	0.0693172	0.0313095	96	0.0293323	0.118716	Roots
Halanaerobiaceae	Germfree	Germfree	0.0789857	0.0351755	96	0.0299323	0.120859	Roots
Cohaesibacteraceae	Weeks	Weeks	0.0486497	0.021724	96	0.0303516	0.122263	Roots
Pasteurellaceae	Weeks	Weeks	0.150731	0.0673561	96	0.0304653	0.122433	Roots
Micromonosporaceae	Germfree	Germfree	-0.0491412	0.0220001	96	0.0307578	0.123031	Roots
Thiotrichaceae	Weeks	Weeks	-0.0280804	0.0127959	96	0.0307468	0.123031	Roots
Deinococcaceae	Germfree	Germfree	-0.0144221	0.00662547	96	0.0320862	0.128046	Roots
Planococcaceae	Germfree	Germfree	0.0476103	0.0215163	96	0.0322735	0.128494	Roots
Hahellaceae	TET_density	TET_density	-0.279696	0.126658	96	0.0326062	0.129517	Roots
Candidatus_Paracaedibacteraceae	Weeks	Weeks	-0.113113	0.0514774	96	0.0334318	0.132489	Roots
Pseudoalteromonadaceae	Weeks	Weeks	-0.0659116	0.0301551	96	0.0343264	0.13572	Roots
Magnetococcaceae	Weeks	Weeks	-0.0494616	0.0227234	96	0.0350422	0.137913	Roots
Oscillatoriaceae	Germfree	Germfree	-0.0399762	0.0183579	96	0.0349687	0.137913	Roots
Wenzhouxiangellaceae	Germfree	Germfree	-0.0371141	0.0170748	96	0.0352865	0.138556	Roots
Terasakiellaceae	Weeks	Weeks	-0.0566297	0.0260773	96	0.0354478	0.138871	Roots
Beijerinckiaceae	Weeks	Weeks	0.204659	0.094381	96	0.0357035	0.138919	Roots
Methylobacteriaceae	Germfree	Germfree	0.0275408	0.0126918	96	0.03558	0.138919	Roots
Thermodesulfobacteriaceae	Germfree	Germfree	-0.0506426	0.0233508	96	0.0356761	0.138919	Roots
Calditrichaceae	Weeks	Weeks	-0.052735	0.0243818	96	0.036155	0.140357	Roots
Turicibacteraceae	Germfree	Germfree	0.147656	0.0695671	93	0.0365116	0.14142	Roots
Stappiaceae	Germfree	Germfree	0.0319529	0.014844	96	0.0370069	0.143015	Roots
Barnesiellaceae	Weeks	Weeks	-0.061519	0.0286958	96	0.0377428	0.145531	Roots
Halomonadaceae	Weeks	Weeks	0.0258413	0.0120628	96	0.0378791	0.145728	Roots
Rhabdochlamydiaceae	Germfree	Germfree	0.303668	0.142137	93	0.0383749	0.147305	Roots
Chamaesiphonaceae	Weeks	Weeks	0.0542837	0.0254224	96	0.0384771	0.147366	Roots
Synechococcaceae	Germfree	Germfree	-0.0133321	0.00624767	96	0.0385919	0.147476	Roots
Nitrobacteraceae	Weeks	Weeks	0.113885	0.0534009	96	0.0387041	0.147575	Roots
Atopobiaceae	Weeks	Weeks	0.0364182	0.017121	96	0.0391881	0.149089	Roots
Christensenellaceae	Germfree	Germfree	-0.0441148	0.0208086	96	0.0398138	0.151133	Roots
Sphingobacteriaceae	Weeks	Weeks	-0.160054	0.0758221	96	0.0406326	0.1539	Roots
Jonesiaceae	Weeks	Weeks	-0.0682569	0.0324235	96	0.0411563	0.155197	Roots
Salinisphaeraceae	Weeks	Weeks	-0.049759	0.0236304	96	0.0411059	0.155197	Roots
Nostocaceae	TET_density	TET_density	-0.352927	0.168066	96	0.0416387	0.156671	Roots
Leptolyngbyaceae	TET_density	TET_density	-0.260869	0.124803	96	0.0425444	0.159379	Roots
Yersiniaceae	Weeks	Weeks	-0.0445746	0.0213244	96	0.0425381	0.159379	Roots
Nitrospiraceae	Weeks	Weeks	-0.0457746	0.0219626	96	0.0431175	0.161173	Roots
Roseobacteraceae	Germfree	Germfree	0.0251668	0.0120869	96	0.043314	0.161554	Roots
Erysipelotrichaceae	Germfree	Germfree	0.0597048	0.0287265	96	0.0436763	0.162552	Roots
Sneathiellaceae	Germfree	Germfree	-0.0349876	0.0168529	96	0.043902	0.163038	Roots
Leptolyngbyaceae	Germfree	Germfree	-0.0255315	0.0123583	96	0.0448923	0.166354	Roots
Gloeobacteraceae	Weeks	Weeks	-0.030927	0.0149875	96	0.0451328	0.166884	Roots
Blastochloridaceae	Germfree	Germfree	-0.0434324	0.0210828	96	0.0454748	0.167786	Roots
Desulfovibrionaceae	Germfree	Germfree	-0.0195046	0.00949011	96	0.0459608	0.16849	Roots
Lacipirellulaceae	Weeks	Weeks	-0.069831	0.0339619	96	0.0458696	0.16849	Roots
Maricaulaceae	Germfree	Germfree	0.0352744	0.0171534	96	0.0458444	0.16849	Roots
Fibrobacteraceae	TET_density_Weeks	TET_density_Weeks	0.379788	0.188776	96	0.0471935	0.172271	Roots
Hahellaceae	TET_density_Weeks	TET_density_Weeks	0.264635	0.129491	96	0.0471443	0.172271	Roots
Eubacteriaceae	Weeks	Weeks	-0.0501718	0.0245691	96	0.0473089	0.172325	Roots
Brevibacteriaceae	Weeks	Weeks	0.0293172	0.0144203	96	0.0482496	0.175379	Roots
Chloroherpetonaceae	TET_density_Weeks	TET_density_Weeks	0.478614	0.236349	96	0.0491015	0.177346	Roots
Other	Weeks	Weeks	0.0488333	0.0241117	96	0.0490734	0.177346	Roots
Sutterellaceae	Weeks	Weeks	-0.0346078	0.0170893	96	0.0490926	0.177346	Roots
Salinivirgaceae	Weeks	Weeks	-0.089762	0.0443603	96	0.0492678	0.177572	Roots
Muribaculaceae	Weeks	Weeks	0.0843909	0.0417275	96	0.0493802	0.177603	Roots
Pectobacteriaceae	Weeks	Weeks	-0.0368449	0.0183155	96	0.050547	0.181418	Roots
Vicinamibacteraceae	Germfree	Germfree	-0.100423	0.0501104	96	0.0513915	0.184063	Roots
Xanthobacteraceae	TET_density	TET_density	0.439837	0.219679	96	0.0515987	0.184419	Roots
Melioribacteraceae	Weeks	Weeks	-0.132044	0.0662941	96	0.0527687	0.188208	Roots
Baekduiaceae	Germfree	Germfree	0.123522	0.0623975	96	0.0541721	0.192812	Roots
Brevibacteriaceae	Germfree	Germfree	-0.0229585	0.0116129	96	0.0544788	0.193501	Roots
Stappiaceae	TET_density_Weeks	TET_density_Weeks	-0.302757	0.153259	96	0.054657	0.193732	Roots
Blattabacteriaceae	Weeks	Weeks	-0.0759075	0.0384995	96	0.0551052	0.194918	Roots
Kaistiaceae	TET_density	TET_density	0.514916	0.262368	96	0.0561869	0.198334	Roots
Cellulomonadaceae	Germfree	Germfree	-0.101204	0.051617	96	0.0564156	0.198731	Roots
Bacteroidaceae	Weeks	Weeks	-0.0878731	0.0448665	96	0.0566728	0.198976	Roots
Veillonellaceae	Weeks	Weeks	-0.0546317	0.0278993	96	0.0567174	0.198976	Roots
Sporichthyaceae	Weeks	Weeks	0.0574386	0.029354	96	0.0568895	0.199171	Roots
Rikenellaceae	Weeks	Weeks	0.0344933	0.0176405	96	0.0570617	0.199367	Roots
Aerococcaceae	Germfree	Germfree	0.0751962	0.0384864	96	0.057245	0.1996	Roots
Geobacteraceae	Germfree	Germfree	0.0945298	0.0484832	96	0.0577469	0.200743	Roots
Micromonosporaceae	Weeks	Weeks	-0.0532505	0.0273184	96	0.0578073	0.200743	Roots
Idiomarinaceae	Weeks	Weeks	-0.0752493	0.0386727	96	0.0582338	0.201814	Roots
Nautiliaceae	Germfree	Germfree	0.114427	0.0588546	95	0.0584288	0.202081	Roots
Candidatus_Brocadiaceae	Weeks	Weeks	-0.0681304	0.035265	96	0.059971	0.206165	Roots
Nostocaceae	TET_density_Weeks	TET_density_Weeks	0.332105	0.171825	96	0.0598632	0.206165	Roots
Other	TET_density_Weeks	TET_density_Weeks	-0.387502	0.20048	96	0.0598555	0.206165	Roots
Tepidanaerobacteraceae	Germfree	Germfree	0.067231	0.0349421	96	0.0609813	0.209218	Roots
Sporomusaceae	Germfree	Germfree	0.0584856	0.0304616	96	0.0615107	0.210002	Roots
Thermoanaerobacterales_Family_IV._Incertae_Sedis	Weeks	Weeks	-0.0967617	0.0503816	96	0.0614327	0.210002	Roots
Usitatibacteraceae	TET_density	TET_density	0.860943	0.448534	96	0.0615778	0.210002	Roots
Chloroherpetonaceae	TET_density	TET_density	-0.443491	0.231178	96	0.0617161	0.210056	Roots
Kosmotogaceae	Weeks	Weeks	0.0585998	0.0305932	96	0.0621001	0.210526	Roots
Spirochaetaceae	Weeks	Weeks	0.0752691	0.0392817	96	0.0620108	0.210526	Roots
Stappiaceae	TET_density	TET_density	0.286119	0.149906	96	0.0629966	0.213143	Roots
Leptolyngbyaceae	TET_density_Weeks	TET_density_Weeks	0.243263	0.127595	96	0.0632779	0.213672	Roots
Merismopediaceae	Weeks	Weeks	-0.0501639	0.0263855	96	0.063992	0.214901	Roots
Sporichthyaceae	Germfree	Germfree	-0.0449702	0.0236393	96	0.0638372	0.214901	Roots
Symbiobacteriaceae	Weeks	Weeks	-0.0408357	0.0214812	96	0.0640184	0.214901	Roots
Anaerohalosphaeraceae	TET_density	TET_density	-0.359914	0.189836	96	0.0647031	0.216351	Roots
Syntrophaceae	Germfree	Germfree	-0.0289513	0.0152669	96	0.0646456	0.216351	Roots
Azospirillaceae	TET_density_Weeks	TET_density_Weeks	-0.265156	0.142424	96	0.0658674	0.219815	Roots
Persicobacteraceae	Germfree	Germfree	0.0630507	0.0334258	96	0.0660213	0.2199	Roots
Zymomonadaceae	Germfree	Germfree	-0.0664632	0.035262	96	0.0662213	0.220138	Roots
Azospirillaceae	TET_density	TET_density	0.258728	0.139308	96	0.0665116	0.220674	Roots
Shewanellaceae	Weeks	Weeks	-0.0308396	0.0163917	96	0.0666973	0.220862	Roots
Anaeromyxobacteraceae	Weeks	Weeks	-0.0555156	0.0295678	96	0.067234	0.22221	Roots
Acidothermaceae	Weeks	Weeks	-0.0689385	0.0369586	96	0.0689739	0.227521	Roots
Chlamydiaceae	Weeks	Weeks	-0.29986	0.161142	92	0.0696119	0.229184	Roots
Geovibrionaceae	Germfree	Germfree	-0.0378134	0.020366	96	0.0702138	0.230722	Roots
Usitatibacteraceae	TET_density_Weeks	TET_density_Weeks	-0.850925	0.458567	96	0.0703705	0.230794	Roots
Wenzhouxiangellaceae	Weeks	Weeks	-0.0393175	0.0212026	96	0.0705522	0.230947	Roots
Haliscomenobacteraceae	Weeks	Weeks	-0.0481892	0.0260187	96	0.0708846	0.231592	Roots
Elioraeaceae	Weeks	Weeks	0.0442554	0.0239117	96	0.0710776	0.231781	Roots
Salinisphaeraceae	Germfree	Germfree	0.0350997	0.0190301	96	0.0720162	0.234395	Roots
Deinococcaceae	Weeks	Weeks	0.0149587	0.00822714	96	0.0723216	0.234497	Roots
Phycisphaeraceae	Weeks	Weeks	0.0373742	0.0202785	96	0.0722222	0.234497	Roots
Xanthobacteraceae	TET_density_Weeks	TET_density_Weeks	-0.413525	0.224593	96	0.0724947	0.234614	Roots
Kordiimonadaceae	Germfree	Germfree	0.0214435	0.0118493	96	0.0736444	0.237885	Roots
Acanthopleuribacteraceae	Germfree	Germfree	0.0224478	0.0122704	96	0.0742759	0.23934	Roots
Coleofasciculaceae	Germfree	Germfree	0.0198997	0.0110244	96	0.0743742	0.23934	Roots
Fulvivirgaceae	Weeks	Weeks	-0.0586925	0.032142	96	0.0747936	0.240238	Roots
Acanthopleuribacteraceae	Weeks	Weeks	0.0277802	0.0152367	96	0.075224	0.241168	Roots
Emcibacteraceae	Germfree	Germfree	0.0326835	0.0180185	96	0.0766768	0.244605	Roots
Syntrophomonadaceae	Weeks	Weeks	-0.0561344	0.0309522	96	0.0767249	0.244605	Roots
Thioalkalispiraceae	Germfree	Germfree	0.0319647	0.0176173	96	0.0765969	0.244605	Roots
Desulfarculaceae	Germfree	Germfree	-0.0261696	0.0146761	96	0.0778966	0.24764	Roots
Pseudonocardiaceae	Weeks	Weeks	0.0414855	0.0229745	96	0.0779662	0.24764	Roots
Sphaerotilaceae	Weeks	Weeks	0.13223	0.0733352	96	0.078384	0.248506	Roots

## Sheet: DF_ARGs
feature	metadata	value	coef	stderr	N.not.0	pval	qval	sample_type
SMER	Germfree	Germfree	1.29731	0.0709894	95	3.29998e-32	4.02597e-29	Soils
ARNA	Germfree	Germfree	1.43282	0.0814186	96	4.83078e-31	2.94678e-28	Soils
MEXM	Germfree	Germfree	1.7986	0.115676	77	2.33518e-27	9.49641e-25	Soils
OPMH	Germfree	Germfree	1.76797	0.114384	96	3.46267e-27	1.05611e-24	Soils
MEXJ	Germfree	Germfree	1.855	0.121602	96	8.23711e-27	2.00986e-24	Soils
MEXB	Germfree	Germfree	1.0866	0.0720143	96	1.68594e-26	3.15403e-24	Soils
RPSD_(RAMA_OR_SUD2)	Germfree	Germfree	1.69243	0.112287	87	1.80969e-26	3.15403e-24	Soils
MEXA	Germfree	Germfree	1.76413	0.118389	96	3.80537e-26	4.91736e-24	Soils
MEXK	Germfree	Germfree	0.933888	0.0625513	96	3.35616e-26	4.91736e-24	Soils
MUXA	Germfree	Germfree	1.7991	0.120844	94	4.03063e-26	4.91736e-24	Soils
PVRR	Germfree	Germfree	1.73805	0.117517	91	6.18021e-26	6.85442e-24	Soils
MVAT	Germfree	Germfree	1.68588	0.115622	94	1.54177e-25	1.56747e-23	Soils
CAMP-REGULATORY_PROTEIN	Germfree	Germfree	1.69818	0.117511	90	2.72709e-25	2.55926e-23	Soils
OPMB	Germfree	Germfree	1.81135	0.128595	94	1.37643e-24	1.19946e-22	Soils
BASS	Germfree	Germfree	1.78294	0.128165	92	2.99777e-24	2.43819e-22	Soils
MEXL	Germfree	Germfree	1.73094	0.12594	91	6.33886e-24	4.83338e-22	Soils
MEXV	Germfree	Germfree	1.73936	0.127074	93	8.16922e-24	5.86262e-22	Soils
MEXN	Germfree	Germfree	1.26541	0.0937019	96	1.86483e-23	1.26394e-21	Soils
OLEC	Germfree	Germfree	-1.92705	0.144297	86	3.67641e-23	2.36064e-21	Soils
MEXW	Germfree	Germfree	0.984543	0.0790376	96	2.25986e-21	1.37851e-19	Soils
MDTF	Germfree	Germfree	0.680875	0.0406616	96	1.87331e-20	1.0883e-18	Soils
OPRN	Germfree	Germfree	1.68884	0.104566	95	7.18733e-20	3.9857e-18	Soils
ADC-23	Weeks	Weeks	-2.27714	0.200175	82	3.5746e-19	1.89609e-17	Soils
AAC(3)-VII	Germfree	Germfree	-1.95001	0.128167	62	6.44775e-19	3.2776e-17	Soils
ADC-42	Weeks	Weeks	-1.94675	0.174318	64	9.5766e-19	4.67338e-17	Soils
CMEB	Germfree	Germfree	1.07685	0.0968183	91	1.18858e-18	5.57717e-17	Soils
ABCA	Germfree	Germfree	1.34785	0.12642	91	1.06813e-17	4.82637e-16	Soils
MEXS	Germfree	Germfree	1.38239	0.129824	69	1.1391e-17	4.96321e-16	Soils
LSA	Germfree	Germfree	2.03891	0.148151	60	2.3461e-17	9.86982e-16	Soils
PMRF	Germfree	Germfree	1.05981	0.101338	92	2.82796e-17	1.15004e-15	Soils
BACA	Germfree	Germfree	0.864344	0.063341	96	3.16327e-17	1.206e-15	Soils
VANI	Germfree	Germfree	-1.25929	0.120657	85	3.13091e-17	1.206e-15	Soils
ADEC	Weeks	Weeks	-2.24001	0.16708	94	5.87168e-17	2.17074e-15	Soils
ADEI	Weeks	Weeks	-2.12971	0.164654	94	2.03461e-16	7.30067e-15	Soils
ACRD	Germfree	Germfree	1.04262	0.082342	95	4.21773e-16	1.47018e-14	Soils
MTRA	Germfree	Germfree	-1.30598	0.103227	95	4.3396e-16	1.47064e-14	Soils
SMEF	Germfree	Germfree	0.818187	0.0831025	95	5.36825e-16	1.77007e-14	Soils
TCMA	Germfree	Germfree	-2.03522	0.163019	88	6.8177e-16	2.18884e-14	Soils
TOLC	Weeks	Weeks	-2.09385	0.171455	96	1.43497e-15	4.48888e-14	Soils
MEXR	Germfree	Germfree	1.52293	0.128738	84	4.14771e-15	1.26505e-13	Soils
MDTK	Weeks	Weeks	-2.1664	0.18389	95	4.7546e-15	1.41478e-13	Soils
MUXC	Germfree	Germfree	0.782238	0.0833765	96	5.00993e-15	1.45526e-13	Soils
AXYY	Germfree	Germfree	0.624251	0.0537725	96	7.71458e-15	2.18879e-13	Soils
MDFA	Weeks	Weeks	-2.09884	0.1824	96	1.03098e-14	2.85864e-13	Soils
MACA	Weeks	Weeks	-1.82216	0.159447	96	1.29019e-14	3.49786e-13	Soils
ACRF	Germfree	Germfree	0.569541	0.0501062	95	1.53712e-14	4.07672e-13	Soils
OPRA	Germfree	Germfree	0.914228	0.100438	95	1.92784e-14	5.00418e-13	Soils
OPRM	Germfree	Germfree	1.01957	0.0915849	96	3.01282e-14	7.6153e-13	Soils
OTRA	Germfree	Germfree	-1.54115	0.138501	77	3.0586e-14	7.6153e-13	Soils
RBPA	Germfree	Germfree	-1.455	0.131374	72	3.55638e-14	8.67758e-13	Soils
CAT_CHLORAMPHENICOL_ACETYLTRANSFERASE	Germfree	Germfree	1.41972	0.129016	78	4.36951e-14	1.04525e-12	Soils
MDTL	Weeks	Weeks	-2.09425	0.190621	92	4.6013e-14	1.07953e-12	Soils
CARO	Weeks	Weeks	-2.19259	0.201461	88	6.21213e-14	1.42996e-12	Soils
MEXD	Germfree	Germfree	0.609627	0.0564303	96	7.85782e-14	1.77528e-12	Soils
ADEH	Weeks	Weeks	-1.84607	0.176579	96	2.2006e-13	4.88133e-12	Soils
BAER	Germfree	Germfree	1.14193	0.109596	81	2.44338e-13	5.32309e-12	Soils
VANR	Germfree	Germfree	-0.892793	0.0860037	96	2.74493e-13	5.87512e-12	Soils
ADEJ	Weeks	Weeks	-1.64469	0.159086	96	3.11373e-13	6.54957e-12	Soils
MEXY	Germfree	Germfree	0.503735	0.059867	95	5.28226e-13	1.09226e-11	Soils
CATB	Germfree	Germfree	1.44478	0.142336	60	5.47527e-13	1.1133e-11	Soils
ADEK	Weeks	Weeks	-2.06094	0.204552	88	6.86959e-13	1.37392e-11	Soils
ADER	Weeks	Weeks	-2.10582	0.209925	90	7.85032e-13	1.54474e-11	Soils
MUXB	Germfree	Germfree	0.631227	0.0761297	96	9.51337e-13	1.84227e-11	Soils
ADES	Weeks	Weeks	-2.11103	0.212321	84	1.02763e-12	1.95893e-11	Soils
VANX	Germfree	Germfree	-1.26957	0.128108	96	1.13467e-12	2.12969e-11	Soils
MAJOR_FACILITATOR_SUPERFAMILY_TRANSPORTER	Weeks	Weeks	-1.45069	0.146637	96	1.1952e-12	2.20931e-11	Soils
CLASS_C	Germfree	Germfree	0.984036	0.120501	82	1.73208e-12	3.15395e-11	Soils
ABES	Weeks	Weeks	-2.11888	0.217925	83	2.01083e-12	3.5046e-11	Soils
ADEI	Germfree	Germfree	-1.29023	0.132599	94	1.96637e-12	3.5046e-11	Soils
TETA(48)	Germfree	Germfree	-0.848365	0.087246	95	2.00572e-12	3.5046e-11	Soils
MARR	Weeks	Weeks	-1.99948	0.20677	89	2.36603e-12	4.06557e-11	Soils
APH(3')-I	Weeks	Weeks	-2.19266	0.230512	93	3.85235e-12	6.5276e-11	Soils
EFPA	Germfree	Germfree	-1.55211	0.163465	87	4.06144e-12	6.78761e-11	Soils
AIM-1	Germfree	Germfree	-1.23029	0.132977	59	8.65798e-12	1.4274e-10	Soils
ABEM	Weeks	Weeks	-1.99689	0.219502	73	1.40585e-11	2.28686e-10	Soils
ADEL	Weeks	Weeks	-1.98874	0.221213	88	1.97083e-11	3.1637e-10	Soils
AMRB	Germfree	Germfree	0.738534	0.0830126	96	2.64936e-11	4.19768e-10	Soils
ADEA	Weeks	Weeks	-2.24024	0.253672	91	3.2604e-11	5.07695e-10	Soils
MDSC	Germfree	Germfree	0.919098	0.121786	54	3.28753e-11	5.07695e-10	Soils
ADEB	Weeks	Weeks	-1.25814	0.142685	96	3.40454e-11	5.19193e-10	Soils
OQXB	Germfree	Germfree	-0.517853	0.0592019	95	4.25883e-11	6.41453e-10	Soils
MDTB	Germfree	Germfree	-0.380162	0.0435339	95	4.46298e-11	6.64005e-10	Soils
MACA	Germfree	Germfree	-1.11847	0.128405	96	4.78924e-11	7.02111e-10	Soils
PUROMYCIN_RESISTANCE_PROTEIN	Germfree	Germfree	-0.879105	0.117763	48	4.8342e-11	7.02111e-10	Soils
MTRD	Germfree	Germfree	0.627982	0.0740332	95	9.93835e-11	1.42645e-09	Soils
ADEN	Weeks	Weeks	-1.90636	0.227186	85	1.33308e-10	1.89112e-09	Soils
ADEC	Germfree	Germfree	-1.12785	0.134553	94	1.37227e-10	1.92433e-09	Soils
MEXE	Germfree	Germfree	0.770152	0.0928608	96	1.8268e-10	2.53261e-09	Soils
OPRM	Weeks	Weeks	-0.941423	0.113725	96	1.92104e-10	2.63333e-09	Soils
PEDO-1	Germfree	Germfree	-1.15009	0.140511	87	2.59695e-10	3.52031e-09	Soils
BJP-1	Weeks	Weeks	1.99071	0.244667	83	3.04088e-10	4.07679e-09	Soils
MEXT	Germfree	Germfree	0.838324	0.10331	96	3.26325e-10	4.32735e-09	Soils
ANT(3'')-IIA	Weeks	Weeks	-2.13898	0.26515	82	3.81013e-10	4.99823e-09	Soils
APH(6)-I	Germfree	Germfree	1.08938	0.135421	88	4.10209e-10	5.32399e-09	Soils
MDTK	Germfree	Germfree	-1.18674	0.14809	95	4.53463e-10	5.76276e-09	Soils
MDTP	Germfree	Germfree	1.11889	0.139623	82	4.53449e-10	5.76276e-09	Soils
ADC-17	Weeks	Weeks	-2.12357	0.266155	76	5.0816e-10	6.39129e-09	Soils
OMPR	Weeks	Weeks	-0.582374	0.0730338	96	5.1598e-10	6.42343e-09	Soils
RPHA	Germfree	Germfree	-0.899205	0.113122	95	5.59926e-10	6.9001e-09	Soils
EFRB	Germfree	Germfree	-1.04135	0.131807	75	6.5601e-10	8.00332e-09	Soils
OXA	Weeks	Weeks	-1.77371	0.22468	95	6.69351e-10	8.08524e-09	Soils
VANY	Germfree	Germfree	0.93697	0.118896	34	7.00204e-10	8.37499e-09	Soils
MEXT	Weeks	Weeks	-0.993234	0.128284	96	1.10132e-09	1.30447e-08	Soils
MAJOR_FACILITATOR_SUPERFAMILY_TRANSPORTER	Germfree	Germfree	-0.913513	0.11809	96	1.12585e-09	1.3207e-08	Soils
MDFA	Germfree	Germfree	-1.11392	0.14689	96	1.85907e-09	2.16006e-08	Soils
ADP-RIBOSYLATING_TRANSFERASE_ARR	Germfree	Germfree	-0.582607	0.0776293	95	2.40769e-09	2.77111e-08	Soils
TETR	Weeks	Weeks	-1.28102	0.170759	96	2.43226e-09	2.77323e-08	Soils
ADEK	Germfree	Germfree	-1.22954	0.16473	88	2.75685e-09	3.11422e-08	Soils
ACRB	Germfree	Germfree	0.397232	0.0532733	96	2.82617e-09	3.13448e-08	Soils
ADC-44	Weeks	Weeks	-1.74669	0.234194	65	2.8092e-09	3.13448e-08	Soils
ADC-8	Germfree	Germfree	-1.41699	0.19081	51	3.12411e-09	3.4337e-08	Soils
EMRB-QACA_FAMILY_MAJOR_FACILITATOR_TRANSPORTER	Germfree	Germfree	0.936709	0.127972	88	4.44616e-09	4.84314e-08	Soils
FOSB	Germfree	Germfree	0.905695	0.124096	33	4.7711e-09	5.1511e-08	Soils
MEXB	Weeks	Weeks	-0.577507	0.0894233	96	5.09997e-09	5.45786e-08	Soils
ADEJ	Germfree	Germfree	-0.912525	0.128115	96	8.5513e-09	9.07182e-08	Soils
VATF	Germfree	Germfree	-1.13321	0.160066	85	9.86952e-09	1.038e-07	Soils
CARO	Germfree	Germfree	-1.14424	0.16224	88	1.07927e-08	1.12539e-07	Soils
ADC-22	Weeks	Weeks	-1.79854	0.256016	65	1.18351e-08	1.22363e-07	Soils
TOLC	Germfree	Germfree	-0.963661	0.138076	96	1.37922e-08	1.41399e-07	Soils
VANS	Germfree	Germfree	-0.809848	0.117448	95	1.82439e-08	1.85479e-07	Soils
AADK	Germfree	Germfree	0.91138	0.134161	31	2.5662e-08	2.5874e-07	Soils
VANH	Germfree	Germfree	-1.12015	0.166068	89	3.01358e-08	3.01358e-07	Soils
MARR	Germfree	Germfree	-1.1177	0.166516	89	3.36386e-08	3.33651e-07	Soils
EMRB	Weeks	Weeks	-0.832744	0.124138	96	3.40979e-08	3.35479e-07	Soils
DFRB6	Germfree	Germfree	0.751667	0.125263	45	3.94283e-08	3.8482e-07	Soils
RPOB2	Germfree	Germfree	-0.441808	0.0675135	96	5.90763e-08	5.72009e-07	Soils
TETB(48)	Germfree	Germfree	-0.69232	0.106281	95	6.53118e-08	6.27405e-07	Soils
OPCM	Germfree	Germfree	0.530575	0.0816394	95	6.86851e-08	6.54655e-07	Soils
ACRA	Germfree	Germfree	0.695111	0.118564	87	7.22576e-08	6.83366e-07	Soils
MFPA	Germfree	Germfree	-0.733729	0.113283	39	7.39505e-08	6.93997e-07	Soils
ANT(3'')-IIA	Germfree	Germfree	-1.3656	0.21353	82	9.72026e-08	9.05245e-07	Soils
CEOB	Germfree	Germfree	0.557355	0.088137	96	1.23574e-07	1.14212e-06	Soils
MDTN	Germfree	Germfree	0.775955	0.124579	96	1.69966e-07	1.55908e-06	Soils
AAC(2')-I	Germfree	Germfree	-0.641434	0.103395	44	1.84752e-07	1.68207e-06	Soils
ADC-17	Germfree	Germfree	-1.31355	0.21434	76	2.37845e-07	2.14941e-06	Soils
MEXK	Weeks	Weeks	-0.432934	0.0776727	96	2.52175e-07	2.26216e-06	Soils
FEZ-1	Germfree	Germfree	-0.845159	0.138611	87	2.63888e-07	2.34995e-06	Soils
METALLO-BETA-LACTAMASE	Germfree	Germfree	1.09712	0.180109	92	2.69193e-07	2.37983e-06	Soils
ADC-18	Weeks	Weeks	-1.16424	0.194086	37	3.67396e-07	3.22462e-06	Soils
BURKHOLDERIA_PSEUDOMALLEI_OMP38	Germfree	Germfree	0.692088	0.116013	95	4.10265e-07	3.57516e-06	Soils
AMRB	Weeks	Weeks	-0.611317	0.10308	96	4.61446e-07	3.99265e-06	Soils
BPEF	Germfree	Germfree	0.447953	0.0758928	95	5.06853e-07	4.35465e-06	Soils
ADEN	Germfree	Germfree	-1.07648	0.182957	85	5.39487e-07	4.60044e-06	Soils
UGD	Weeks	Weeks	-0.539709	0.0917583	96	5.43002e-07	4.60044e-06	Soils
VANJ	Germfree	Germfree	-0.912212	0.156841	48	6.76434e-07	5.69137e-06	Soils
ABEM	Germfree	Germfree	-1.02587	0.176769	73	7.05741e-07	5.89729e-06	Soils
LSAE	Germfree	Germfree	0.912993	0.159872	51	9.61798e-07	7.98227e-06	Soils
MDTL	Germfree	Germfree	-0.871403	0.153511	92	1.07844e-06	8.88984e-06	Soils
KDPE	Germfree	Germfree	0.543372	0.0958499	95	1.10575e-06	9.05377e-06	Soils
VANY	Weeks	Weeks	-0.835704	0.147638	34	1.1375e-06	9.25168e-06	Soils
RM3	Germfree	Germfree	-0.533276	0.103593	37	1.51181e-06	1.22146e-05	Soils
LMRB	Germfree	Germfree	0.580329	0.104432	24	1.60593e-06	1.28897e-05	Soils
MEXI	Germfree	Germfree	-0.562069	0.10127	96	1.64287e-06	1.31e-05	Soils
ADC-41	Weeks	Weeks	-0.684794	0.135029	20	2.06912e-06	1.63917e-05	Soils
UGD	Germfree	Germfree	0.40188	0.0738947	96	2.38123e-06	1.87426e-05	Soils
ABES	Germfree	Germfree	-0.944458	0.175499	83	2.87705e-06	2.25e-05	Soils
FOSA	Germfree	Germfree	0.725443	0.135896	34	3.32125e-06	2.58084e-05	Soils
EMRA	Germfree	Germfree	0.303318	0.0569149	96	3.42072e-06	2.64132e-05	Soils
TAEA	Germfree	Germfree	1.03141	0.19387	83	3.5268e-06	2.70609e-05	Soils
CATB10	Germfree	Germfree	0.498992	0.0938645	28	3.57389e-06	2.70816e-05	Soils
MEXQ	Weeks	Weeks	0.378681	0.0712167	96	3.55958e-06	2.70816e-05	Soils
AAC(3)-IV	Germfree	Germfree	0.800712	0.151914	38	4.15107e-06	3.12612e-05	Soils
MEXX	Weeks	Weeks	-0.785057	0.149029	95	4.19248e-06	3.13793e-05	Soils
ROSB	Germfree	Germfree	0.344359	0.0671333	96	6.61714e-06	4.9225e-05	Soils
ADC-16	Weeks	Weeks	-1.06729	0.208596	46	6.90487e-06	5.10542e-05	Soils
CLBB	Germfree	Germfree	0.440595	0.0924302	18	7.06778e-06	5.19439e-05	Soils
EFRA	Germfree	Germfree	-0.661938	0.130744	44	8.23683e-06	6.01732e-05	Soils
ADC-19	Weeks	Weeks	-1.14302	0.227275	46	9.19707e-06	6.67882e-05	Soils
ADC-19	Germfree	Germfree	-0.919998	0.183029	46	9.28007e-06	6.69922e-05	Soils
ADC-43	Weeks	Weeks	-0.918178	0.183461	31	9.96616e-06	7.15218e-05	Soils
MEXZ	Weeks	Weeks	-0.923679	0.185823	74	1.11398e-05	7.9477e-05	Soils
OPRA	Weeks	Weeks	-0.578047	0.124718	95	1.18829e-05	8.4286e-05	Soils
LLMA_23S_RIBOSOMAL_RNA_METHYLTRANSFERASE	Weeks	Weeks	-0.897451	0.181977	91	1.26579e-05	8.88144e-05	Soils
VANA	Germfree	Germfree	-0.802594	0.16275	93	1.2667e-05	8.88144e-05	Soils
ARR-5	Weeks	Weeks	-0.798183	0.163153	43	1.43952e-05	0.000100355	Soils
ADC-20	Weeks	Weeks	-0.505603	0.104501	24	1.71615e-05	0.00011896	Soils
DFRB6	Weeks	Weeks	0.698559	0.155544	45	2.07432e-05	0.000142976	Soils
MEXQ	Germfree	Germfree	-0.272662	0.0573522	96	2.25472e-05	0.000154537	Soils
ADC-80	Weeks	Weeks	-1.0243	0.215566	32	2.27316e-05	0.00015493	Soils
ADES	Germfree	Germfree	-0.803217	0.170986	84	2.70793e-05	0.000183412	Soils
MEXC	Germfree	Germfree	0.697655	0.148562	85	2.72111e-05	0.000183412	Soils
DFRA3	Germfree	Germfree	0.524014	0.112171	37	2.94437e-05	0.00019737	Soils
AADA	Germfree	Germfree	1.0077	0.216415	41	3.09323e-05	0.000205513	Soils
TETX	Germfree	Germfree	-0.465753	0.10004	95	3.09954e-05	0.000205513	Soils
ADC-23	Germfree	Germfree	-0.704439	0.161205	82	3.29252e-05	0.000217129	Soils
AAC(3)-IIIA	Weeks	Weeks	0.848699	0.183938	87	3.54406e-05	0.00023246	Soils
TRIC	Weeks	Weeks	0.879575	0.190711	95	3.5664e-05	0.000232674	Soils
TET43	Germfree	Germfree	-0.509737	0.110602	93	3.60472e-05	0.000233923	Soils
MEXX	Germfree	Germfree	0.551365	0.120016	95	3.7784e-05	0.000243897	Soils
ADEH	Germfree	Germfree	-0.652809	0.142203	96	3.82005e-05	0.000245288	Soils
GOB-1	Germfree	Germfree	-0.67654	0.156443	57	3.90614e-05	0.000249502	Soils
SMES	Germfree	Germfree	0.811852	0.177428	37	4.00893e-05	0.000254734	Soils
VAND	Germfree	Germfree	-0.686063	0.151688	37	4.74786e-05	0.000300124	Soils
TETA	Weeks	Weeks	0.770463	0.171749	94	5.34084e-05	0.000335867	Soils
ADC-22	Germfree	Germfree	-0.920438	0.206174	65	5.72199e-05	0.000357991	Soils
OPRC	Germfree	Germfree	0.395947	0.0888751	95	5.89341e-05	0.000366835	Soils
APH(3')-I	Germfree	Germfree	-0.813576	0.185636	93	7.4184e-05	0.000457094	Soils
MSI-1	Weeks	Weeks	-0.340302	0.0819464	18	7.3954e-05	0.000457094	Soils
LPEB	Weeks	Weeks	0.765865	0.17527	63	7.73067e-05	0.00047394	Soils
LRA	Germfree	Germfree	-0.339747	0.0778049	96	7.80397e-05	0.000476042	Soils
MEXE	Weeks	Weeks	-0.497999	0.115309	96	9.07735e-05	0.000550964	Soils
TETR	Germfree	Germfree	0.590999	0.137515	96	9.70192e-05	0.000585958	Soils
OPRJ	Germfree	Germfree	0.411389	0.0960868	29	0.000102116	0.000613702	Soils
LSA	Weeks	Weeks	-0.787341	0.183966	60	0.000102633	0.000613787	Soils
FOSB	Weeks	Weeks	-0.65667	0.154095	33	0.000108734	0.000647098	Soils
ADC-8	Weeks	Weeks	-0.999209	0.236937	51	0.000124927	0.000739858	Soils
STAPHYLOCOCCUS_MUPA_CONFERRING_RESISTANCE_TO_MUPIROCIN	Weeks	Weeks	0.833347	0.19907	60	0.000137633	0.000811172	Soils
MDTC	Germfree	Germfree	-0.300437	0.0721014	96	0.000146196	0.000857493	Soils
ADC-44	Germfree	Germfree	-0.780862	0.188601	65	0.000158816	0.000927059	Soils
ADC-6	Weeks	Weeks	-0.688202	0.167857	21	0.000180015	0.0010458	Soils
OPRZ	Germfree	Germfree	0.456209	0.113513	32	0.000231178	0.00133558	Soils
TETV	Weeks	Weeks	0.714562	0.177853	38	0.000232084	0.00133558	Soils
MEXF	Germfree	Germfree	0.254707	0.0634758	96	0.000235721	0.00135014	Soils
MEXZ	Germfree	Germfree	0.5931	0.149647	74	0.000274264	0.00156356	Soils
AADK	Weeks	Weeks	-0.65883	0.166593	31	0.000281592	0.00159787	Soils
MEXG	Germfree	Germfree	0.346847	0.0883221	17	0.000306439	0.00173081	Soils
ESP-1	Germfree	Germfree	-0.602793	0.16102	58	0.00031751	0.00178508	Soils
MEXV	Weeks	Weeks	-0.586467	0.157794	93	0.000348314	0.00194928	Soils
LMRB	Weeks	Weeks	-0.493703	0.129678	24	0.000440955	0.00244529	Soils
TETM	Germfree	Germfree	-0.574123	0.157353	75	0.0004393	0.00244529	Soils
CMRA	Germfree	Germfree	-0.337974	0.0891338	18	0.000461911	0.00254991	Soils
ADC-15	Weeks	Weeks	-0.639481	0.169552	28	0.000490803	0.0026972	Soils
AAC(3)-IX	Germfree	Germfree	-0.222605	0.0617216	14	0.000506349	0.00277016	Soils
MEXI	Weeks	Weeks	0.468476	0.125752	96	0.000563709	0.00305655	Soils
RPSD_(RAMA_OR_SUD2)	TET_density	TET_density	4.05473	1.13396	87	0.000561671	0.00305655	Soils
OPCM	Weeks	Weeks	-0.377167	0.101375	95	0.000572025	0.00308792	Soils
OPMH	Weeks	Weeks	-0.505706	0.142036	96	0.000591173	0.00317723	Soils
LSAE	Weeks	Weeks	-0.732679	0.19852	51	0.000625214	0.00334544	Soils
VANRI	Weeks	Weeks	-0.503755	0.14287	34	0.00066299	0.00353209	Soils
RPSD_(RAMA_OR_SUD2)	TET_density_Weeks	TET_density_Weeks	-4.07548	1.15933	87	0.000686662	0.0036423	Soils
MEXL	Weeks	Weeks	-0.549023	0.156385	91	0.000697394	0.00368321	Soils
ADC-81	Weeks	Weeks	-0.414182	0.113779	15	0.000726399	0.00381033	Soils
FARB	Germfree	Germfree	-0.582545	0.160057	58	0.00072771	0.00381033	Soils
MEXJ	TET_density	TET_density	4.29217	1.22803	96	0.000734169	0.00382772	Soils
BURKHOLDERIA_PSEUDOMALLEI_OMP38	Weeks	Weeks	-0.52105	0.144058	95	0.0007782	0.00404002	Soils
BCRA	Germfree	Germfree	0.366348	0.105751	95	0.000812763	0.00420157	Soils
NORB	Germfree	Germfree	-0.38601	0.108383	94	0.00091614	0.00471599	Soils
GOLS	Germfree	Germfree	0.317436	0.0892614	17	0.000930414	0.00476935	Soils
MEXJ	TET_density_Weeks	TET_density_Weeks	-4.28367	1.2555	96	0.000964191	0.00492104	Soils
MSI-1	Germfree	Germfree	0.225081	0.065993	18	0.000968074	0.00492104	Soils
ADEB	Germfree	Germfree	-0.406619	0.114907	96	0.000979551	0.00493823	Soils
OPMH	TET_density	TET_density	3.93604	1.15514	96	0.000978364	0.00493823	Soils
OPMB	TET_density	TET_density	4.41024	1.29865	94	0.00101522	0.00509698	Soils
TAP	Germfree	Germfree	-0.531287	0.151204	51	0.00105371	0.00526854	Soils
ADEA	Germfree	Germfree	-0.709051	0.204287	91	0.00119368	0.0059396	Soils
MOX	Germfree	Germfree	-0.368347	0.110169	55	0.00120253	0.0059396	Soils
VANB	Germfree	Germfree	0.390754	0.112653	27	0.00120132	0.0059396	Soils
ADEL	Germfree	Germfree	-0.611566	0.178147	88	0.00133219	0.00652719	Soils
OPMH	TET_density_Weeks	TET_density_Weeks	-3.91162	1.18098	96	0.00132898	0.00652719	Soils
ARNA	Weeks	Weeks	-0.332971	0.101101	96	0.00141059	0.00688367	Soils
OPMB	TET_density_Weeks	TET_density_Weeks	-4.30574	1.3277	94	0.00165419	0.00804027	Soils
ARNA	TET_density	TET_density	2.66367	0.822228	96	0.00167215	0.00809532	Soils
CAMP-REGULATORY_PROTEIN	TET_density_Weeks	TET_density_Weeks	-3.92234	1.21326	90	0.00170752	0.0082339	Soils
PVRR	TET_density	TET_density	3.83202	1.18677	91	0.00172884	0.00830389	Soils
LEN	Germfree	Germfree	0.315456	0.094756	29	0.00179412	0.00858363	Soils
CAMP-REGULATORY_PROTEIN	TET_density	TET_density	3.81283	1.18671	90	0.00181764	0.00866221	Soils
PVRR	TET_density_Weeks	TET_density_Weeks	-3.8904	1.21332	91	0.001855	0.00880583	Soils
OPRN	TET_density	TET_density	3.49223	1.05599	95	0.0019103	0.00899832	Soils
TLA-3	TET_density	TET_density	1.49595	0.467888	12	0.00190873	0.00899832	Soils
ARNA	TET_density_Weeks	TET_density_Weeks	-2.67535	0.840619	96	0.00199768	0.00933782	Soils
TLA-3	TET_density_Weeks	TET_density_Weeks	-1.52249	0.478353	12	0.00199656	0.00933782	Soils
MEXM	TET_density	TET_density	3.68969	1.16819	77	0.00215256	0.0100234	Soils
ERM(31)	Germfree	Germfree	-0.222579	0.0685841	12	0.00227446	0.0105507	Soils
CEOA	Germfree	Germfree	0.238343	0.0762008	19	0.00236551	0.0109315	Soils
AAC(3)-IIIA	Germfree	Germfree	-0.478436	0.148129	87	0.00237563	0.0109369	Soils
MDSB	Weeks	Weeks	0.556737	0.172537	95	0.00239633	0.0109495	Soils
MTRE	Weeks	Weeks	-0.468361	0.149915	42	0.00239212	0.0109495	Soils
MEXA	TET_density	TET_density	3.72618	1.19559	96	0.0024482	0.0111448	Soils
OPRN	TET_density_Weeks	TET_density_Weeks	-3.46724	1.07961	95	0.00250061	0.0113411	Soils
MVAT	TET_density	TET_density	3.61947	1.16764	94	0.00257715	0.0116449	Soils
MEXM	Weeks	Weeks	-0.443492	0.14364	77	0.00267543	0.0120444	Soils
AXYY	Weeks	Weeks	-0.209302	0.0667716	96	0.00309819	0.0138963	Soils
MEXM	TET_density_Weeks	TET_density_Weeks	-3.62532	1.19432	77	0.00313149	0.0139942	Soils
MECI	TET_density_Weeks	TET_density_Weeks	-1.46173	0.48261	6	0.00319486	0.0142253	Soils
MECI	TET_density	TET_density	1.42638	0.472051	6	0.00326406	0.0144805	Soils
MDTB	Weeks	Weeks	0.167216	0.0540579	95	0.00347217	0.015348	Soils
MUXA	TET_density	TET_density	3.65948	1.22037	94	0.00349655	0.0154	Soils
MEXA	TET_density_Weeks	TET_density_Weeks	-3.66026	1.22233	96	0.00354022	0.0155362	Soils
ADC-16	Germfree	Germfree	-0.517368	0.167986	46	0.00360275	0.0157539	Soils
MVAT	TET_density_Weeks	TET_density_Weeks	-3.5631	1.19376	94	0.0036442	0.0158783	Soils
CIPA	Germfree	Germfree	0.188675	0.0636109	9	0.00385204	0.0167242	Soils
TRIC	Germfree	Germfree	-0.468412	0.153583	95	0.0039103	0.0169169	Soils
AAC(3)-IV	Weeks	Weeks	0.573872	0.188638	38	0.00399334	0.0172151	Soils
OPRN	Weeks	Weeks	-0.393071	0.129844	95	0.00415916	0.0178668	Soils
MEXA	Weeks	Weeks	-0.431763	0.147009	96	0.00419749	0.0179682	Soils
BASS	TET_density	TET_density	3.79349	1.29431	92	0.00427322	0.0182284	Soils
MVAT	Weeks	Weeks	-0.419813	0.143573	94	0.00436013	0.0185344	Soils
ADC-20	Germfree	Germfree	-0.25319	0.0841566	24	0.00437562	0.0185356	Soils
AAC(3)-IB-AAC(6')-IB	Germfree	Germfree	0.309608	0.103706	21	0.00465827	0.0195849	Soils
CTX-M	Germfree	Germfree	-0.305875	0.105384	33	0.00464402	0.0195849	Soils
SMER	TET_density	TET_density	2.07935	0.716905	95	0.00467148	0.0195849	Soils
MEXG	Weeks	Weeks	-0.327046	0.109673	17	0.00470169	0.019644	Soils
OTRC	Germfree	Germfree	-0.179614	0.0623074	17	0.00491917	0.0204826	Soils
THIN-B	Germfree	Germfree	-0.387155	0.131183	45	0.00510742	0.0211941	Soils
VANC	Germfree	Germfree	-0.0917783	0.0320743	7	0.00523185	0.0216368	Soils
MEXB	TET_density	TET_density	2.07177	0.727256	96	0.00542696	0.0223679	Soils
BASS	TET_density_Weeks	TET_density_Weeks	-3.76438	1.32326	92	0.00548947	0.0225493	Soils
MUXA	TET_density_Weeks	TET_density_Weeks	-3.54086	1.24767	94	0.00559772	0.0229168	Soils
SUL2	Germfree	Germfree	0.73677	0.253299	37	0.00572297	0.0233513	Soils
LPEB	TET_density_Weeks	TET_density_Weeks	-4.23036	1.45731	63	0.00581271	0.0236384	Soils
PUROMYCIN_RESISTANCE_PROTEIN	Weeks	Weeks	-0.412402	0.146231	48	0.00589052	0.0238752	Soils
VANM	Germfree	Germfree	0.272209	0.0976656	26	0.00647252	0.0261473	Soils
LPEB	TET_density	TET_density	4.06558	1.42542	63	0.00664798	0.0267675	Soils
SMER	TET_density_Weeks	TET_density_Weeks	-2.03085	0.732941	95	0.0067789	0.0272048	Soils
MEFA	Germfree	Germfree	-0.206192	0.0729752	13	0.00713161	0.0285264	Soils
ERM(37)	Germfree	Germfree	-0.101345	0.035901	8	0.00718075	0.0286291	Soils
RPSD_(RAMA_OR_SUD2)	Weeks	Weeks	-0.380687	0.139432	87	0.00759838	0.0301955	Soils
AAC(3)-VII	Weeks	Weeks	-0.443823	0.159151	62	0.00785243	0.0311038	Soils
FOSA	Weeks	Weeks	-0.468524	0.168748	34	0.00810621	0.0320051	Soils
MEXB	TET_density_Weeks	TET_density_Weeks	-2.00179	0.743523	96	0.00844634	0.0331335	Soils
OPMB	Weeks	Weeks	-0.430051	0.159682	94	0.00842596	0.0331335	Soils
RPOB2	Weeks	Weeks	0.230872	0.0838344	96	0.00859528	0.0336098	Soils
STAPHYLOCOCCUS_MUPA_CONFERRING_RESISTANCE_TO_MUPIROCIN	TET_density_Weeks	TET_density_Weeks	-4.53123	1.65519	60	0.0089656	0.0349458	Soils
MEXV	TET_density	TET_density	3.42247	1.28329	93	0.00905969	0.0352001	Soils
MEXL	TET_density	TET_density	3.38878	1.27184	91	0.00912166	0.0353283	Soils
NMCR	Weeks	Weeks	-0.533518	0.195913	77	0.00930322	0.0359175	Soils
MEXW	TET_density	TET_density	2.1197	0.798182	96	0.00934533	0.0359663	Soils
MEXJ	Weeks	Weeks	-0.400629	0.150999	96	0.00940901	0.0360975	Soils
APH(6)-I	Weeks	Weeks	0.448901	0.168158	88	0.0106749	0.0407273	Soils
TAP	Weeks	Weeks	0.501166	0.187756	51	0.0106826	0.0407273	Soils
MSBA	Germfree	Germfree	0.171839	0.0644597	96	0.0107756	0.0409541	Soils
TET(33)	Germfree	Germfree	0.192237	0.0739629	21	0.0109041	0.0413138	Soils
EMRB	Germfree	Germfree	-0.263204	0.0999709	96	0.0117168	0.0442555	Soils
MEXV	TET_density_Weeks	TET_density_Weeks	-3.36907	1.312	93	0.0118615	0.0446638	Soils
MEXK	TET_density	TET_density	1.61937	0.631691	96	0.0120007	0.0450488	Soils
APH(9)-IA	TET_density	TET_density	2.81727	1.07613	22	0.0121637	0.0453813	Soils
SMEC	Germfree	Germfree	0.346473	0.132298	21	0.0121358	0.0453813	Soils
STAPHYLOCOCCUS_MUPA_CONFERRING_RESISTANCE_TO_MUPIROCIN	TET_density	TET_density	4.23141	1.61898	60	0.0122976	0.0457409	Soils
APH(9)-IA	TET_density_Weeks	TET_density_Weeks	-2.87363	1.1002	22	0.0123505	0.0457983	Soils
MEXW	TET_density_Weeks	TET_density_Weeks	-2.0447	0.816036	96	0.0140002	0.0517584	Soils
BRUCELLA_SUIS_MPRF	Germfree	Germfree	0.51562	0.202488	50	0.0145465	0.0536156	Soils
ADC-43	Germfree	Germfree	-0.374778	0.147745	31	0.0149031	0.0547644	Soils
ADER	Germfree	Germfree	-0.428239	0.169056	90	0.0150342	0.0550804	Soils
VANC	Weeks	Weeks	0.0986455	0.039828	7	0.0151048	0.0551731	Soils
MEXL	TET_density_Weeks	TET_density_Weeks	-3.21867	1.30029	91	0.0151617	0.0552156	Soils
CATB	Weeks	Weeks	0.445015	0.176745	60	0.0156123	0.0566874	Soils
MEXK	TET_density_Weeks	TET_density_Weeks	-1.58585	0.645821	96	0.0159662	0.0578005	Soils
PBP-1A	Weeks	Weeks	0.324017	0.12982	26	0.0164782	0.0594774	Soils
MDTE	Germfree	Germfree	-0.305297	0.123108	26	0.0171363	0.0616705	Soils
TRIA	Germfree	Germfree	0.250401	0.101293	10	0.0174682	0.0626801	Soils
ADEF	Weeks	Weeks	-0.293772	0.119059	96	0.0176659	0.0631803	Soils
BICYCLOMYCIN-MULTIDRUG_EFFLUX_PROTEIN_BCR	Weeks	Weeks	-0.304455	0.126041	12	0.0177112	0.0631803	Soils
DFRB2	Germfree	Germfree	0.158276	0.0642067	18	0.0177668	0.063194	Soils
MEXN	TET_density	TET_density	2.27887	0.946274	96	0.0180456	0.0639988	Soils
MTRR	Germfree	Germfree	-0.15797	0.0643408	9	0.0181999	0.0643592	Soils
EMRK	Germfree	Germfree	0.308226	0.125955	90	0.0185615	0.0654482	Soils
MTRR	Weeks	Weeks	-0.194605	0.0798947	9	0.0190788	0.0670783	Soils
MEXW	Weeks	Weeks	-0.233919	0.0981444	96	0.0192309	0.0674186	Soils
MEXN	Weeks	Weeks	-0.276904	0.116354	96	0.019407	0.0678411	Soils
AAC(3)-X	Germfree	Germfree	-0.122339	0.0515068	10	0.0196377	0.0684514	Soils
ADC-12	Germfree	Germfree	-0.140683	0.0593298	9	0.0198395	0.0689578	Soils
TETG	Weeks	Weeks	0.492346	0.207858	51	0.0199677	0.0692063	Soils
ADC-41	Germfree	Germfree	-0.25692	0.108741	20	0.0202739	0.0700684	Soils
METALLO-BETA-LACTAMASE	Weeks	Weeks	0.537187	0.223649	92	0.0207016	0.0713444	Soils
MTRC	TET_density_Weeks	TET_density_Weeks	-0.970211	0.412439	9	0.0208099	0.0715159	Soils
MULTIDRUG_ABC_TRANSPORTER	Weeks	Weeks	-0.287491	0.119987	96	0.0209973	0.0719571	Soils
MEXN	TET_density_Weeks	TET_density_Weeks	-2.26088	0.967439	96	0.0216347	0.0739337	Soils
GOLS	Weeks	Weeks	-0.263636	0.11084	17	0.0218941	0.0746112	Soils
TET(42)	Germfree	Germfree	0.459217	0.193433	67	0.0221305	0.0752068	Soils
MEXR	TET_density	TET_density	3.07541	1.30009	84	0.0225838	0.076534	Soils
FLOR	Germfree	Germfree	-0.411203	0.175155	83	0.0235633	0.0796323	Soils
TETB(48)	TET_density	TET_density	-2.51055	1.07331	95	0.0240472	0.0810431	Soils
LRFA	Weeks	Weeks	0.520925	0.222975	41	0.0242085	0.0813282	Soils
MEXR	TET_density_Weeks	TET_density_Weeks	-3.10338	1.32917	84	0.0242907	0.0813282	Soils
MTRC	TET_density	TET_density	0.923828	0.403416	9	0.0243318	0.0813282	Soils
ADC-81	Germfree	Germfree	-0.213532	0.0916287	15	0.0245451	0.0818171	Soils
TLA-3	Weeks	Weeks	0.131069	0.0575314	12	0.0250544	0.083287	Soils
BASS	Weeks	Weeks	-0.362096	0.159148	92	0.0252415	0.0836812	Soils
ADC-80	Germfree	Germfree	-0.401845	0.1736	32	0.0254658	0.084196	Soils
TET41	Weeks	Weeks	0.533034	0.230461	81	0.0255781	0.0843385	Soils
PENA	Germfree	Germfree	0.193171	0.0853542	9	0.0260029	0.0855083	Soils
RPHA	Weeks	Weeks	0.322934	0.140468	95	0.026428	0.0866724	Soils
TETB(48)	TET_density_Weeks	TET_density_Weeks	2.51752	1.09732	95	0.0267218	0.0874011	Soils
MDSB	Germfree	Germfree	-0.318224	0.138947	95	0.0269736	0.0879887	Soils
ADC-6	Germfree	Germfree	-0.309411	0.135178	21	0.027058	0.0880288	Soils
VATI	Germfree	Germfree	0.0825983	0.0372793	5	0.0292092	0.0947745	Soils
QACH	TET_density	TET_density	-0.775602	0.344518	5	0.029534	0.0955742	Soils
MDTF	TET_density	TET_density	0.923808	0.410632	96	0.0296397	0.0956624	Soils
CLASS_A	Weeks	Weeks	-0.42501	0.191037	82	0.0313968	0.101066	Soils
BJP-1	TET_density	TET_density	4.3951	1.98981	83	0.0325674	0.104511	Soils
CMEB	TET_density	TET_density	2.12137	0.977746	91	0.0326384	0.104511	Soils
MACB	Weeks	Weeks	-0.101782	0.0462082	96	0.0330262	0.105476	Soils
LPEB	Germfree	Germfree	-0.309947	0.141148	63	0.0335421	0.106844	Soils
SMER	Weeks	Weeks	-0.188848	0.0881506	95	0.0348366	0.110679	Soils
QACH	TET_density_Weeks	TET_density_Weeks	0.766137	0.352225	5	0.0351649	0.111432	Soils
MDTF	TET_density_Weeks	TET_density_Weeks	-0.910388	0.419817	96	0.0356955	0.11282	Soils
FOSA3	Germfree	Germfree	0.150865	0.0709633	5	0.0362148	0.114165	Soils
VATF	Weeks	Weeks	0.427532	0.198761	85	0.0371396	0.116779	Soils
OQXB	TET_density	TET_density	-1.27843	0.597866	95	0.0382146	0.11985	Soils
AAC(2')-IE	Germfree	Germfree	-0.134421	0.062979	10	0.0385545	0.120606	Soils
CMEB	TET_density_Weeks	TET_density_Weeks	-2.0952	0.999616	91	0.0388575	0.121243	Soils
BJP-1	TET_density_Weeks	TET_density_Weeks	-4.32745	2.03432	83	0.039178	0.121932	Soils
ADC-12	Weeks	Weeks	-0.153936	0.0736724	9	0.0394565	0.122486	Soils
TETA(48)	TET_density	TET_density	-1.87017	0.881077	95	0.0395852	0.122573	Soils
SMEB	TET_density	TET_density	-1.595	0.752823	96	0.039933	0.123337	Soils
SMEB	Weeks	Weeks	0.195524	0.092567	96	0.0405121	0.12481	Soils
SMEF	Weeks	Weeks	-0.214148	0.103192	95	0.0407868	0.12534	Soils
FARA	Germfree	Germfree	-0.142391	0.0688996	94	0.0416092	0.127226	Soils
OMPF	Weeks	Weeks	-0.213513	0.103307	13	0.0415944	0.127226	Soils
OPRM	TET_density	TET_density	1.94088	0.924895	96	0.0417732	0.127408	Soils
EMRE	Weeks	Weeks	0.415887	0.198588	83	0.0421711	0.128301	Soils
QACH	Germfree	Germfree	0.071337	0.0341149	5	0.0424653	0.128555	Soils
TETB(48)	Weeks	Weeks	-0.27609	0.131974	95	0.0423786	0.128555	Soils
APH(9)-IA	Weeks	Weeks	0.275521	0.132321	22	0.0433075	0.13078	Soils
AAC(3)-I	Weeks	Weeks	0.309299	0.148755	32	0.0435929	0.131317	Soils
ADC-42	Germfree	Germfree	-0.286818	0.140382	64	0.0439314	0.132011	Soils
OPRZ	Weeks	Weeks	-0.291097	0.140955	32	0.0449674	0.134792	Soils
SMEB	Germfree	Germfree	-0.153741	0.074546	96	0.0452473	0.135298	Soils
PMRF	Weeks	Weeks	-0.255151	0.125835	92	0.0455202	0.13545	Soils
VANS	TET_density	TET_density	-2.44314	1.18609	95	0.0455003	0.13545	Soils
MUXA	Weeks	Weeks	-0.303715	0.150057	94	0.0459027	0.136256	Soils
CMX	Weeks	Weeks	-0.348096	0.172122	56	0.0460723	0.136428	Soils
AAC(2')-I	Weeks	Weeks	0.262142	0.12839	44	0.0473396	0.139841	Soils
PEDO-2	Germfree	Germfree	-0.303766	0.15152	48	0.0479565	0.141235	Soils
RAMA	Germfree	Germfree	0.086975	0.0427391	5	0.0480431	0.141235	Soils
TETP	TET_density	TET_density	1.54153	0.772848	19	0.0490777	0.143241	Soils
VANS	TET_density_Weeks	TET_density_Weeks	2.45635	1.21262	95	0.049034	0.143241	Soils
VATI	Weeks	Weeks	-0.092379	0.0462913	5	0.0489675	0.143241	Soils
MDSC	Weeks	Weeks	-0.301066	0.151227	54	0.0495003	0.14413	Soils
PUROMYCIN_RESISTANCE_PROTEIN	TET_density_Weeks	TET_density_Weeks	2.41201	1.21586	48	0.0502929	0.146089	Soils
TETA(48)	TET_density_Weeks	TET_density_Weeks	1.81175	0.900785	95	0.0505884	0.146598	Soils
CLASS_C	Weeks	Weeks	0.296124	0.149631	82	0.0508358	0.146966	Soils
KASUGAMYCIN_RESISTANCE_PROTEIN_KSGA	Germfree	Germfree	0.307331	0.153155	48	0.0510999	0.14738	Soils
ARR-5	Germfree	Germfree	0.263068	0.13139	43	0.0515964	0.148461	Soils
EFPA	Weeks	Weeks	0.403468	0.202981	87	0.0532351	0.152816	Soils
MEXR	Weeks	Weeks	-0.315926	0.159859	84	0.0545609	0.155982	Soils
TET(33)	Weeks	Weeks	0.178837	0.091843	21	0.0545937	0.155982	Soils
MEXS	Weeks	Weeks	-0.313143	0.161208	69	0.0551717	0.156963	Soils
MUXB	Weeks	Weeks	-0.183612	0.0945335	96	0.0551944	0.156963	Soils
SMEB	TET_density_Weeks	TET_density_Weeks	1.51376	0.769662	96	0.0556826	0.157983	Soils
PVRR	Weeks	Weeks	-0.281553	0.145926	91	0.0567936	0.160761	Soils
OPRM	TET_density_Weeks	TET_density_Weeks	-1.84803	0.945583	96	0.0571788	0.161477	Soils
AADA	Weeks	Weeks	0.520499	0.268732	41	0.0593499	0.167049	Soils
NMCR	TET_density	TET_density	-3.08506	1.59331	77	0.0594256	0.167049	Soils
RGT1438	TET_density	TET_density	0.898244	0.473604	10	0.0610512	0.171224	Soils
OTRC	TET_density_Weeks	TET_density_Weeks	1.21722	0.643302	17	0.0616519	0.172512	Soils
MEXT	TET_density	TET_density	1.99602	1.0433	96	0.0623984	0.174202	Soils
TETP	TET_density_Weeks	TET_density_Weeks	-1.48642	0.790135	19	0.0631393	0.175826	Soils
TETQ	TET_density_Weeks	TET_density_Weeks	2.21749	1.17934	22	0.0632686	0.175826	Soils
EMRR	Weeks	Weeks	-0.181685	0.0955972	9	0.064081	0.177679	Soils
CLBB	Weeks	Weeks	-0.214031	0.114775	18	0.065433	0.181016	Soils
VANM	TET_density	TET_density	-1.83485	0.986302	26	0.0660678	0.182359	Soils
ACRF	Weeks	Weeks	0.117001	0.0622191	95	0.0668282	0.184041	Soils
ARR-7	Germfree	Germfree	-0.112772	0.0606916	14	0.0700078	0.192364	Soils
RGT1438	TET_density_Weeks	TET_density_Weeks	-0.88539	0.484198	10	0.0707398	0.193938	Soils
MUXC	TET_density	TET_density	1.53713	0.842	96	0.0711943	0.194311	Soils
PMRA	Weeks	Weeks	0.178767	0.0978696	16	0.0710412	0.194311	Soils
OQXB	TET_density_Weeks	TET_density_Weeks	1.12948	0.611239	95	0.0715107	0.194739	Soils
CAMP-REGULATORY_PROTEIN	Weeks	Weeks	-0.265477	0.145918	90	0.0721455	0.19603	Soils
DFRA2D	Germfree	Germfree	0.0740482	0.0406146	7	0.0752311	0.203499	Soils
NMCR	TET_density_Weeks	TET_density_Weeks	2.96861	1.62894	77	0.0753515	0.203499	Soils
TETP	Weeks	Weeks	0.170921	0.0950293	19	0.0753946	0.203499	Soils
NORB	Weeks	Weeks	0.244676	0.134585	94	0.0760337	0.204771	Soils
BICYCLOMYCIN-MULTIDRUG_EFFLUX_PROTEIN_BCR	Germfree	Germfree	0.181813	0.101503	12	0.076586	0.205804	Soils
PMRA	TET_density	TET_density	1.42386	0.795947	16	0.0769595	0.206353	Soils
SMEE	Weeks	Weeks	0.21101	0.116751	96	0.0777067	0.2079	Soils
PMRA	TET_density_Weeks	TET_density_Weeks	-1.45068	0.813751	16	0.0779687	0.208144	Soils
MUXC	TET_density_Weeks	TET_density_Weeks	-1.51509	0.860833	96	0.0817635	0.217798	Soils
OQXA	TET_density_Weeks	TET_density_Weeks	1.85046	1.04442	13	0.0835228	0.222	Soils
RGT1438	Germfree	Germfree	-0.0819037	0.0468972	10	0.0841071	0.223067	Soils
FARB	Weeks	Weeks	0.351131	0.19875	58	0.0843765	0.223296	Soils
TETV	Germfree	Germfree	-0.252042	0.143228	38	0.0855684	0.225881	Soils
VANR	TET_density	TET_density	-1.52759	0.868532	96	0.0857237	0.225881	Soils
MEXT	TET_density_Weeks	TET_density_Weeks	-1.87353	1.06664	96	0.0861258	0.225964	Soils
QEPA	Germfree	Germfree	-0.17877	0.101731	25	0.0859869	0.225964	Soils
BAES	Weeks	Weeks	-0.227136	0.129505	14	0.086577	0.226661	Soils
FLOR	Weeks	Weeks	0.380109	0.217497	83	0.087663	0.229012	Soils
OTRC	TET_density	TET_density	-1.08443	0.629228	17	0.0882059	0.229448	Soils
PUROMYCIN_RESISTANCE_PROTEIN	TET_density	TET_density	-2.05082	1.18926	48	0.0880213	0.229448	Soils
OCH	Germfree	Germfree	0.288524	0.166216	33	0.089755	0.232486	Soils
TETQ	TET_density	TET_density	-1.97882	1.15354	22	0.0896685	0.232486	Soils
FEZ-1	Weeks	Weeks	0.298585	0.172119	87	0.089947	0.23249	Soils
MUXC	Weeks	Weeks	-0.176927	0.103532	96	0.0908759	0.234394	Soils
APH(3')-IIB	Weeks	Weeks	-0.320634	0.185939	17	0.0918187	0.235783	Soils
OQXA	TET_density	TET_density	-1.76138	1.02157	13	0.0918572	0.235783	Soils
VANB	Weeks	Weeks	-0.241084	0.139886	27	0.0919939	0.235783	Soils
ESP-1	Weeks	Weeks	-0.338457	0.199946	58	0.0939247	0.239724	Soils
VANZ	Germfree	Germfree	-0.116648	0.0689084	10	0.0939143	0.239724	Soils
SPG-1	Germfree	Germfree	-0.0928407	0.0550593	9	0.0951839	0.241952	Soils
SUL2	TET_density	TET_density	-4.36434	2.558	37	0.0951943	0.241952	Soils
MDTC	Weeks	Weeks	0.151779	0.0895315	96	0.0972577	0.245898	Soils
SMEF	TET_density_Weeks	TET_density_Weeks	1.43769	0.858005	95	0.0972447	0.245898	Soils
VANXI	Germfree	Germfree	-0.136567	0.0805816	11	0.0973514	0.245898	Soils
OTRC	Weeks	Weeks	-0.129461	0.0773698	17	0.0977081	0.246289	Soils
VANM	TET_density_Weeks	TET_density_Weeks	1.68421	1.00836	26	0.0983088	0.247164	Soils
VANR	TET_density_Weeks	TET_density_Weeks	1.49976	0.887959	96	0.0984602	0.247164	Soils
TETM	Weeks	Weeks	0.325908	0.195392	75	0.0987586	0.247403	Soils
TETM	Weeks	Weeks	0.530628	0.111211	22	2.13273e-05	0.0116873	Leaves
MEXN	Germfree	Germfree	0.860349	0.0681503	96	1.04076e-21	1.26972e-18	Roots
MEXW	Germfree	Germfree	0.642675	0.0540652	96	3.21507e-20	1.96119e-17	Roots
MEXL	Germfree	Germfree	1.40362	0.126779	78	1.51374e-18	6.15587e-16	Roots
BASS	Germfree	Germfree	1.53272	0.140734	78	3.57586e-18	1.09064e-15	Roots
ARNA	Germfree	Germfree	0.973452	0.0782325	96	7.63047e-16	1.86183e-13	Roots
MUXA	Germfree	Germfree	1.70194	0.137911	88	1.00856e-15	2.05074e-13	Roots
MEXA	Germfree	Germfree	1.72729	0.141812	96	1.56744e-15	2.67209e-13	Roots
MUXC	Germfree	Germfree	0.396257	0.0413823	96	1.97122e-15	2.67209e-13	Roots
OPRN	Germfree	Germfree	1.61701	0.133335	92	1.81284e-15	2.67209e-13	Roots
MEXJ	Germfree	Germfree	1.72028	0.143651	89	2.76239e-15	3.37012e-13	Roots
MVAT	Germfree	Germfree	1.66892	0.139919	92	3.15404e-15	3.49812e-13	Roots
MEXR	Germfree	Germfree	1.34655	0.113715	59	4.0131e-15	4.07999e-13	Roots
MEXV	Germfree	Germfree	1.689	0.144543	85	6.22444e-15	5.06254e-13	Roots
PVRR	Germfree	Germfree	1.48463	0.127014	77	6.16251e-15	5.06254e-13	Roots
RPSD_(RAMA_OR_SUD2)	Germfree	Germfree	1.46907	0.125656	60	6.11954e-15	5.06254e-13	Roots
OPMH	Germfree	Germfree	1.73098	0.159235	93	6.45111e-14	4.91897e-12	Roots
OPMB	Germfree	Germfree	1.7625	0.179307	89	1.45122e-12	1.04146e-10	Roots
MUXB	Germfree	Germfree	0.283443	0.0379852	96	4.90515e-11	3.3246e-09	Roots
MEXM	Germfree	Germfree	1.3056	0.154433	51	1.08852e-10	6.98945e-09	Roots
MEXB	Germfree	Germfree	0.776481	0.0930432	96	1.5454e-10	9.42697e-09	Roots
CAMP-REGULATORY_PROTEIN	Germfree	Germfree	1.24424	0.150483	83	1.98247e-10	1.15172e-08	Roots
MDTL	Weeks	Weeks	-2.00809	0.246062	85	2.80834e-10	1.55735e-08	Roots
MEXS	Germfree	Germfree	0.77378	0.112183	49	6.83257e-10	3.62423e-08	Roots
AAC(3)-VII	Germfree	Germfree	-1.13883	0.145018	79	7.66331e-10	3.89552e-08	Roots
LSA	Germfree	Germfree	1.24277	0.162385	52	1.47698e-09	7.20769e-08	Roots
ADEA	Weeks	Weeks	-1.86665	0.249356	82	2.56457e-09	1.15881e-07	Roots
MEXK	Germfree	Germfree	0.620412	0.0828238	96	2.52359e-09	1.15881e-07	Roots
ABES	Weeks	Weeks	-1.76422	0.245284	77	6.77887e-09	2.95365e-07	Roots
BACA	Germfree	Germfree	0.362068	0.0518208	96	1.34414e-08	5.65465e-07	Roots
ADEH	Weeks	Weeks	-1.5608	0.224938	94	1.57807e-08	6.41748e-07	Roots
MARR	Weeks	Weeks	-1.71986	0.250885	84	2.0863e-08	8.2106e-07	Roots
ADC-17	Weeks	Weeks	-1.8092	0.267189	72	2.76168e-08	1.05289e-06	Roots
APH(3')-I	Weeks	Weeks	-1.7975	0.26627	87	2.95808e-08	1.06143e-06	Roots
SMER	Germfree	Germfree	0.599346	0.0887719	96	2.94976e-08	1.06143e-06	Roots
ADER	Weeks	Weeks	-1.57689	0.238693	85	4.79462e-08	1.67127e-06	Roots
MDTK	Weeks	Weeks	-1.70937	0.259216	88	4.99036e-08	1.69118e-06	Roots
TOLC	Weeks	Weeks	-1.61231	0.246495	93	5.96812e-08	1.96787e-06	Roots
ANT(3'')-IIA	Weeks	Weeks	-1.85631	0.285337	74	6.71678e-08	2.15644e-06	Roots
ADC-23	Weeks	Weeks	-1.7133	0.264435	76	7.34209e-08	2.29676e-06	Roots
ADES	Weeks	Weeks	-1.60879	0.250365	78	8.77748e-08	2.67713e-06	Roots
ADEL	Weeks	Weeks	-1.62495	0.253653	73	9.37406e-08	2.78935e-06	Roots
OXA	Weeks	Weeks	-1.29514	0.202532	93	9.74158e-08	2.8297e-06	Roots
TCMA	Germfree	Germfree	-0.974267	0.153113	95	1.08322e-07	3.07332e-06	Roots
EFPA	Germfree	Germfree	-0.877948	0.139185	94	1.3037e-07	3.61481e-06	Roots
MTRA	Germfree	Germfree	-0.541785	0.0862658	96	1.42884e-07	3.87374e-06	Roots
RBPA	Germfree	Germfree	-0.918685	0.147226	91	1.63643e-07	4.34008e-06	Roots
ADEC	Weeks	Weeks	-1.60933	0.261146	94	2.12098e-07	5.50552e-06	Roots
AAC(2')-I	Germfree	Germfree	-0.766588	0.125635	62	2.60091e-07	6.61064e-06	Roots
ADC-8	Germfree	Germfree	-1.21655	0.201601	54	3.25818e-07	8.11221e-06	Roots
MDTF	Germfree	Germfree	0.348532	0.057935	96	3.46668e-07	8.45871e-06	Roots
OLEC	Germfree	Germfree	-0.782534	0.130412	92	3.65061e-07	8.73283e-06	Roots
MEXY	Weeks	Weeks	-0.38172	0.0638146	96	3.88743e-07	9.06934e-06	Roots
RPHA	Germfree	Germfree	-0.304852	0.0509983	96	3.93996e-07	9.06934e-06	Roots
ADC-44	Weeks	Weeks	-1.15395	0.196782	55	5.76225e-07	1.30184e-05	Roots
OQXB	Germfree	Germfree	-0.278258	0.0483178	96	8.19046e-07	1.81679e-05	Roots
ADC-22	Weeks	Weeks	-1.4357	0.255041	48	1.26221e-06	2.74981e-05	Roots
ADEK	Germfree	Germfree	-1.0851	0.193141	87	1.30995e-06	2.77816e-05	Roots
ADEN	Weeks	Weeks	-1.50722	0.268394	76	1.32077e-06	2.77816e-05	Roots
AXYY	Germfree	Germfree	0.295933	0.0528403	96	1.38936e-06	2.87291e-05	Roots
MACA	Weeks	Weeks	-1.32833	0.238153	95	1.49934e-06	3.04867e-05	Roots
ADEK	Weeks	Weeks	-1.31829	0.239832	87	1.96253e-06	3.90972e-05	Roots
MEXF	Germfree	Germfree	0.129655	0.0255158	96	1.98691e-06	3.90972e-05	Roots
CMEB	Germfree	Germfree	0.650109	0.119759	87	2.46234e-06	4.72103e-05	Roots
MAJOR_FACILITATOR_SUPERFAMILY_TRANSPORTER	Germfree	Germfree	-0.824369	0.151909	96	2.47661e-06	4.72103e-05	Roots
ADEI	Weeks	Weeks	-1.48967	0.27497	91	2.5529e-06	4.79159e-05	Roots
MDFA	Weeks	Weeks	-1.39566	0.261602	91	3.35649e-06	6.20442e-05	Roots
MDFA	Germfree	Germfree	-1.12219	0.210673	91	3.45069e-06	6.20554e-05	Roots
MDTN	Germfree	Germfree	0.819508	0.15387	89	3.45882e-06	6.20554e-05	Roots
MDTK	Germfree	Germfree	-1.10233	0.208752	88	4.01971e-06	7.10732e-05	Roots
ADEJ	Weeks	Weeks	-1.21683	0.230773	96	4.12363e-06	7.18689e-05	Roots
TETR	Weeks	Weeks	-1.10241	0.21012	94	4.49775e-06	7.72853e-05	Roots
ADEI	Germfree	Germfree	-1.13112	0.221438	91	7.10055e-06	0.000120315	Roots
APH(6)-I	Germfree	Germfree	0.558452	0.119268	85	9.86583e-06	0.000162653	Roots
MACA	Germfree	Germfree	-0.960508	0.191789	95	9.8559e-06	0.000162653	Roots
CATB	Germfree	Germfree	0.636309	0.127613	45	1.05896e-05	0.000172257	Roots
ADEJ	Germfree	Germfree	-0.91062	0.185846	96	1.40422e-05	0.000225415	Roots
CAT_CHLORAMPHENICOL_ACETYLTRANSFERASE	Germfree	Germfree	0.619132	0.136572	61	1.76231e-05	0.000279223	Roots
MULTIDRUG_ABC_TRANSPORTER	Germfree	Germfree	-0.217368	0.0453027	96	1.95532e-05	0.000305832	Roots
MAJOR_FACILITATOR_SUPERFAMILY_TRANSPORTER	Weeks	Weeks	-0.900258	0.188632	96	2.12434e-05	0.000328062	Roots
ADC-42	Weeks	Weeks	-1.02785	0.21646	48	2.29689e-05	0.000350276	Roots
ABEM	Weeks	Weeks	-1.19015	0.251199	67	2.37701e-05	0.000358019	Roots
VANJ	Germfree	Germfree	-0.637573	0.134784	73	2.4356e-05	0.000362369	Roots
ABCA	Germfree	Germfree	0.623002	0.132528	87	2.67868e-05	0.000393734	Roots
VANH	Germfree	Germfree	-0.63023	0.134374	93	2.77355e-05	0.000402825	Roots
ADEC	Germfree	Germfree	-0.985068	0.210306	94	2.82926e-05	0.000406081	Roots
CARO	Germfree	Germfree	-1.15358	0.247832	76	3.10947e-05	0.000441111	Roots
CARO	Weeks	Weeks	-1.42981	0.307743	76	3.19656e-05	0.000448254	Roots
ADEN	Germfree	Germfree	-0.997287	0.216143	76	3.54434e-05	0.000491375	Roots
TOLC	Germfree	Germfree	-0.914239	0.198507	93	3.64189e-05	0.000499225	Roots
TRIC	Weeks	Weeks	0.428763	0.0932287	96	3.71899e-05	0.00050413	Roots
ADEB	Weeks	Weeks	-0.902385	0.198435	96	4.38736e-05	0.000588195	Roots
ADC-80	Weeks	Weeks	-0.644983	0.146535	28	6.9868e-05	0.000926511	Roots
TET43	Germfree	Germfree	-0.410885	0.0943928	95	8.15023e-05	0.00106917	Roots
ABEM	Germfree	Germfree	-0.849918	0.202295	67	0.000131262	0.00170361	Roots
MARR	Germfree	Germfree	-0.844987	0.202042	84	0.000139352	0.00178958	Roots
ADC-6	Weeks	Weeks	-0.401915	0.0972858	18	0.000163319	0.00201262	Roots
MEXY	Germfree	Germfree	0.212544	0.0513911	96	0.000161041	0.00201262	Roots
ROSB	Germfree	Germfree	0.150455	0.0364165	96	0.000163207	0.00201262	Roots
SMES	Germfree	Germfree	0.202564	0.0514907	12	0.000163021	0.00201262	Roots
VANX	Germfree	Germfree	-0.556667	0.134906	96	0.00016585	0.00202337	Roots
DFRB6	Germfree	Germfree	0.364705	0.0935296	27	0.000184329	0.00222655	Roots
TETA(48)	Germfree	Germfree	-0.287591	0.0709694	96	0.000208595	0.00249496	Roots
RPOB2	Germfree	Germfree	-0.1332	0.0332722	96	0.000242572	0.00287318	Roots
ACRD	Germfree	Germfree	0.60596	0.15163	89	0.000247874	0.00290775	Roots
BJP-1	Weeks	Weeks	0.715042	0.179378	93	0.000255667	0.00297061	Roots
ADP-RIBOSYLATING_TRANSFERASE_ARR	Germfree	Germfree	-0.228135	0.0579819	96	0.000299487	0.00344692	Roots
CEOA	Germfree	Germfree	-0.518212	0.135662	22	0.000424337	0.00483824	Roots
MDTL	Germfree	Germfree	-0.755316	0.198159	85	0.00043499	0.00491377	Roots
OPRM	Germfree	Germfree	0.568039	0.149208	96	0.000441125	0.00493737	Roots
ADC-16	Weeks	Weeks	-0.647198	0.171234	28	0.000479104	0.0053137	Roots
ARR-5	Weeks	Weeks	-0.632125	0.169315	33	0.000550353	0.00604893	Roots
TETB(48)	Weeks	Weeks	-0.366322	0.0985762	96	0.000579551	0.00631297	Roots
ADEA	Germfree	Germfree	-0.740223	0.200811	82	0.000633745	0.00684221	Roots
MEXI	Weeks	Weeks	0.248469	0.0683247	96	0.000734247	0.00785773	Roots
VAND	Germfree	Germfree	-0.478709	0.132522	41	0.000788942	0.00836965	Roots
TETB(48)	Germfree	Germfree	-0.285306	0.0793853	96	0.000832828	0.00875905	Roots
LSAE	Germfree	Germfree	0.434739	0.122067	44	0.000916212	0.00955367	Roots
MTRD	Weeks	Weeks	-0.454323	0.128484	96	0.000987159	0.0102062	Roots
METALLO-BETA-LACTAMASE	Germfree	Germfree	0.752731	0.213371	86	0.00101123	0.0103673	Roots
VANJ	Weeks	Weeks	-0.58869	0.167367	73	0.00104256	0.0105993	Roots
ADC-19	Weeks	Weeks	-0.747009	0.212878	35	0.00106803	0.0107686	Roots
MDTP	Germfree	Germfree	0.551533	0.15807	68	0.00113184	0.0113184	Roots
VANY	Germfree	Germfree	0.257868	0.0769078	15	0.00116647	0.0115699	Roots
TCMA	Weeks	Weeks	-0.66058	0.190128	95	0.00118146	0.011624	Roots
PUROMYCIN_RESISTANCE_PROTEIN	Germfree	Germfree	-0.523167	0.151514	66	0.00125738	0.012272	Roots
TETX	Weeks	Weeks	-0.349234	0.102007	96	0.00136841	0.0132497	Roots
ADEH	Germfree	Germfree	-0.610735	0.181147	94	0.00158972	0.0152713	Roots
TRUNCATED_PUTATIVE_RESPONSE_REGULATOR_ARLR	Germfree	Germfree	0.302351	0.0900286	28	0.00165044	0.0157307	Roots
ADC-17	Germfree	Germfree	-0.720861	0.215172	72	0.00168975	0.0159805	Roots
EMRB-QACA_FAMILY_MAJOR_FACILITATOR_TRANSPORTER	Germfree	Germfree	0.416075	0.125098	89	0.0018103	0.0169394	Roots
TAP	Germfree	Germfree	-0.514045	0.154632	50	0.0018189	0.0169394	Roots
SHV	Germfree	Germfree	0.320349	0.0966631	36	0.00187265	0.0173078	Roots
MULTIDRUG_ABC_TRANSPORTER	Weeks	Weeks	-0.183109	0.0562544	96	0.00221331	0.0201884	Roots
OLEC	Weeks	Weeks	-0.527006	0.161938	92	0.00221741	0.0201884	Roots
ADEB	Germfree	Germfree	-0.516102	0.159803	96	0.00237729	0.0214837	Roots
PEDO-2	Germfree	Germfree	-0.367514	0.114393	35	0.00249245	0.0223587	Roots
MEXE	Germfree	Germfree	0.318277	0.0999721	96	0.00270344	0.0240744	Roots
ACRD	TET_density	TET_density	4.8605	1.53127	89	0.00277596	0.0245411	Roots
AIM-1	Germfree	Germfree	-0.405107	0.128063	56	0.00286071	0.0247718	Roots
EMRB	Weeks	Weeks	-0.473765	0.149781	96	0.00286297	0.0247718	Roots
OMPR	Germfree	Germfree	-0.249295	0.0787097	96	0.00282966	0.0247718	Roots
ADC-15	Weeks	Weeks	-0.243072	0.0798028	13	0.00303474	0.0260731	Roots
VANR	Germfree	Germfree	-0.214337	0.0688387	96	0.00328308	0.0280095	Roots
ACRD	TET_density_Weeks	TET_density_Weeks	-4.85244	1.56552	89	0.00341261	0.0289124	Roots
LRA	Germfree	Germfree	-0.217372	0.070291	96	0.00347985	0.0292788	Roots
FARB	Germfree	Germfree	-0.452425	0.147273	72	0.00368073	0.0307568	Roots
AAC(3)-X	Germfree	Germfree	-0.227069	0.0763588	18	0.0037659	0.0312544	Roots
ABCA	Weeks	Weeks	0.503069	0.164566	87	0.00383563	0.031618	Roots
ADEF	Weeks	Weeks	-0.199234	0.065297	96	0.0038964	0.0316907	Roots
OQXB	Weeks	Weeks	-0.183074	0.0599984	96	0.00389515	0.0316907	Roots
ACRA	TET_density_Weeks	TET_density_Weeks	-4.33856	1.42884	85	0.00405646	0.0327741	Roots
ADC-20	Weeks	Weeks	-0.185289	0.0629916	10	0.00414225	0.0328876	Roots
ADES	Germfree	Germfree	-0.611256	0.201623	78	0.00410937	0.0328876	Roots
PMRF	Germfree	Germfree	0.409454	0.135225	88	0.00415138	0.0328876	Roots
AAC(3)-VIII	Germfree	Germfree	-0.187176	0.0638562	13	0.00426925	0.0330783	Roots
ACRA	TET_density	TET_density	4.22139	1.39757	85	0.00423605	0.0330783	Roots
SUL2	Germfree	Germfree	0.544238	0.180263	43	0.0042519	0.0330783	Roots
VANA	Germfree	Germfree	-0.38247	0.126798	96	0.00428392	0.0330783	Roots
MEXQ	Germfree	Germfree	-0.118359	0.0395965	96	0.00461198	0.0353875	Roots
MACB	Germfree	Germfree	-0.0996611	0.0349515	96	0.0053854	0.0410637	Roots
PEDO-1	Germfree	Germfree	-0.34728	0.118741	93	0.00548413	0.0415567	Roots
VANS	Germfree	Germfree	-0.23011	0.0796918	96	0.00605508	0.0456	Roots
AXYY	Weeks	Weeks	-0.189302	0.0656141	96	0.0060939	0.0456108	Roots
ABES	Germfree	Germfree	-0.566996	0.197532	77	0.0063358	0.0471322	Roots
MDTB	Germfree	Germfree	-0.105567	0.0368541	96	0.00643597	0.0475872	Roots
SMEB	Weeks	Weeks	0.10548	0.0369155	96	0.00655822	0.048199	Roots
MDSB	Weeks	Weeks	0.231021	0.0823366	96	0.0075091	0.0544463	Roots
MEXD	Weeks	Weeks	-0.247485	0.088257	96	0.00754215	0.0544463	Roots
VANC	TET_density	TET_density	0.895806	0.319123	5	0.00748413	0.0544463	Roots
ADC-22	Germfree	Germfree	-0.571926	0.205389	48	0.00793673	0.0557238	Roots
FOSB	Germfree	Germfree	0.181036	0.0649839	11	0.00791052	0.0557238	Roots
MFPA	Germfree	Germfree	-0.4471	0.160387	51	0.00787427	0.0557238	Roots
TETA(48)	Weeks	Weeks	-0.246082	0.0881258	96	0.00777702	0.0557238	Roots
VANE	Germfree	Germfree	-0.193532	0.0713037	13	0.00794749	0.0557238	Roots
ADC-23	Germfree	Germfree	-0.589291	0.212955	76	0.00830364	0.0578883	Roots
AAC(3)-IV	Weeks	Weeks	0.369395	0.133634	25	0.0083682	0.0580068	Roots
VANC	TET_density_Weeks	TET_density_Weeks	-0.900823	0.326261	5	0.00843743	0.0581563	Roots
ADP-RIBOSYLATING_TRANSFERASE_ARR	Weeks	Weeks	-0.198619	0.0719987	96	0.00849038	0.0581925	Roots
ADC-12	Weeks	Weeks	-0.166772	0.0606977	7	0.00873672	0.0595464	Roots
AAC(3)-IV	Germfree	Germfree	0.293462	0.107618	25	0.00921635	0.0624664	Roots
TETA	Germfree	Germfree	0.304566	0.115116	91	0.00960369	0.064732	Roots
PMRA	Weeks	Weeks	0.246226	0.0914055	11	0.0100339	0.0672603	Roots
ADC-44	Germfree	Germfree	-0.423103	0.158472	55	0.0106647	0.0709678	Roots
MEXW	TET_density	TET_density	1.42283	0.545992	96	0.0107033	0.0709678	Roots
CMX	Weeks	Weeks	-0.331626	0.127375	40	0.0107739	0.0710494	Roots
SMEF	Germfree	Germfree	0.380978	0.143225	93	0.0109364	0.0717333	Roots
AADK	Germfree	Germfree	0.187471	0.0708928	15	0.0113773	0.0742264	Roots
ADC-18	Weeks	Weeks	-0.393379	0.149828	26	0.0119336	0.0774413	Roots
MEXB	Weeks	Weeks	-0.302744	0.115536	96	0.0120912	0.0780488	Roots
EMRB	Germfree	Germfree	-0.314764	0.120621	96	0.0124252	0.079783	Roots
ANT(3'')-IIA	Germfree	Germfree	-0.596778	0.229787	74	0.0128193	0.0815871	Roots
SMER	Weeks	Weeks	-0.286212	0.110232	96	0.0128399	0.0815871	Roots
ACRB	Germfree	Germfree	0.0878497	0.0338864	96	0.0129684	0.0819766	Roots
OMPR	Weeks	Weeks	-0.252777	0.0977373	96	0.013171	0.0828278	Roots
LSA	Weeks	Weeks	-0.520641	0.201641	52	0.0133125	0.0832884	Roots
TET(42)	Germfree	Germfree	0.343515	0.133285	65	0.0134706	0.0838479	Roots
MEXT	Weeks	Weeks	-0.578917	0.226315	96	0.0141338	0.0872629	Roots
MEXT	Germfree	Germfree	0.466065	0.182256	96	0.0141623	0.0872629	Roots
KLEBSIELLA_PNEUMONIAE_OMPK37	TET_density_Weeks	TET_density_Weeks	-3.30259	1.29864	8	0.0146668	0.0899174	Roots
KLEBSIELLA_PNEUMONIAE_OMPK37	TET_density	TET_density	3.21518	1.27023	8	0.0151065	0.0917838	Roots
MEXW	TET_density_Weeks	TET_density_Weeks	-1.38231	0.558204	96	0.0151218	0.0917838	Roots
AAC(3)-IIIA	Germfree	Germfree	0.384597	0.15228	78	0.0153164	0.0920827	Roots
CAMP-REGULATORY_PROTEIN	TET_density	TET_density	3.83568	1.51969	83	0.0153774	0.0920827	Roots
TETV	Weeks	Weeks	0.49121	0.194658	43	0.0153974	0.0920827	Roots
UGD	Weeks	Weeks	-0.334381	0.13346	96	0.0160949	0.0957844	Roots
MDSC	Germfree	Germfree	0.269106	0.110046	33	0.0163943	0.0970923	Roots
ACRF	Germfree	Germfree	0.156565	0.0633451	96	0.0174866	0.100479	Roots
ADEL	Germfree	Germfree	-0.504953	0.204272	73	0.017472	0.100479	Roots
ADER	Germfree	Germfree	-0.4765	0.192224	85	0.0171797	0.100479	Roots
MEXG	Germfree	Germfree	0.151041	0.0624336	13	0.0175427	0.100479	Roots
MEXN	TET_density	TET_density	1.66563	0.688234	96	0.0175008	0.100479	Roots
OQXA	TET_density	TET_density	3.15366	1.27237	19	0.0171924	0.100479	Roots
TRIC	TET_density	TET_density	1.87778	0.758204	96	0.0172751	0.100479	Roots
LLMA_23S_RIBOSOMAL_RNA_METHYLTRANSFERASE	Weeks	Weeks	-0.380073	0.154764	87	0.018173	0.103603	Roots
CAMP-REGULATORY_PROTEIN	TET_density_Weeks	TET_density_Weeks	-3.81256	1.55368	83	0.0182589	0.103608	Roots
CPXA	TET_density_Weeks	TET_density_Weeks	-4.3416	1.77956	23	0.0188982	0.10674	Roots
AMRB	Weeks	Weeks	-0.36068	0.148141	96	0.0191286	0.107467	Roots
CPXA	TET_density	TET_density	4.23511	1.74063	23	0.0192031	0.107467	Roots
EFRB	Germfree	Germfree	-0.325676	0.134071	74	0.0193882	0.107566	Roots
ROSB	TET_density	TET_density	0.893269	0.367762	96	0.0193971	0.107566	Roots
AAC(3)-IX	Germfree	Germfree	-0.141156	0.0585435	12	0.0202485	0.110774	Roots
ADC-81	Weeks	Weeks	-0.119349	0.0505509	8	0.0203616	0.110774	Roots
ADEF	Germfree	Germfree	-0.126734	0.0525849	96	0.0202994	0.110774	Roots
OQXA	TET_density_Weeks	TET_density_Weeks	-3.13164	1.30083	19	0.0204297	0.110774	Roots
TRIC	TET_density_Weeks	TET_density_Weeks	-1.87147	0.775163	96	0.0200948	0.110774	Roots
VANI	Germfree	Germfree	-0.275818	0.115499	96	0.0214012	0.115529	Roots
APH(3')-I	Germfree	Germfree	-0.509898	0.214432	87	0.0219272	0.117345	Roots
OPRM	Weeks	Weeks	-0.440563	0.185278	96	0.02193	0.117345	Roots
OMPF	TET_density_Weeks	TET_density_Weeks	-2.79938	1.17876	17	0.0220877	0.117672	Roots
MDTE	TET_density_Weeks	TET_density_Weeks	-3.87497	1.64001	43	0.0227326	0.120581	Roots
AXYX	Weeks	Weeks	0.143643	0.0609336	6	0.0230265	0.121607	Roots
MEXN	TET_density_Weeks	TET_density_Weeks	-1.62568	0.703628	96	0.0231252	0.121607	Roots
OMPF	TET_density	TET_density	2.70594	1.15297	17	0.0236042	0.123593	Roots
ACRA	Weeks	Weeks	0.401026	0.171846	85	0.0243583	0.126106	Roots
ARR-7	Weeks	Weeks	-0.135031	0.0589915	7	0.0243943	0.126106	Roots
DFRA3	Germfree	Germfree	0.244133	0.104541	25	0.0242639	0.126106	Roots
ACT	TET_density	TET_density	3.34024	1.43367	9	0.0245777	0.126229	Roots
TETG	Germfree	Germfree	0.366986	0.15757	57	0.0246249	0.126229	Roots
DNA-BINDING_PROTEIN_H-NS	TET_density_Weeks	TET_density_Weeks	-2.53575	1.09632	9	0.0255752	0.13021	Roots
LSAE	Weeks	Weeks	-0.350359	0.151575	44	0.0256658	0.13021	Roots
PMRF	Weeks	Weeks	-0.387972	0.167915	88	0.0257218	0.13021	Roots
MDTE	TET_density	TET_density	3.70035	1.60413	43	0.0259496	0.13082	Roots
LMRB	Germfree	Germfree	0.160739	0.0698028	8	0.0261949	0.131513	Roots
ESP-1	Germfree	Germfree	-0.2422	0.105608	38	0.0267756	0.133771	Roots
PATA	TET_density_Weeks	TET_density_Weeks	-3.38653	1.47755	21	0.0268639	0.133771	Roots
ADC-80	Germfree	Germfree	-0.269344	0.118008	28	0.0274709	0.135686	Roots
MDTC	Germfree	Germfree	-0.0809768	0.035468	96	0.0274278	0.135686	Roots
TETR	Germfree	Germfree	0.385316	0.169213	94	0.0278139	0.136826	Roots
ACT	TET_density_Weeks	TET_density_Weeks	-3.33086	1.46574	9	0.0281153	0.137754	Roots
MUXC	TET_density	TET_density	0.928332	0.417911	96	0.028807	0.140578	Roots
DNA-BINDING_PROTEIN_H-NS	TET_density	TET_density	2.41876	1.07234	9	0.0292392	0.141555	Roots
PATA	TET_density	TET_density	3.2615	1.44522	21	0.0291612	0.141555	Roots
TET(33)	TET_density	TET_density	1.96155	0.886583	23	0.0294356	0.141942	Roots
TET(33)	TET_density_Weeks	TET_density_Weeks	-2.00378	0.906414	23	0.0295654	0.142007	Roots
FLOR	Weeks	Weeks	-0.369749	0.167947	76	0.0302237	0.1446	Roots
LEN	TET_density	TET_density	2.09858	0.95428	29	0.0304037	0.144893	Roots
MEXE	Weeks	Weeks	-0.277659	0.12414	96	0.0305469	0.145008	Roots
LEN	TET_density_Weeks	TET_density_Weeks	-2.12803	0.975625	29	0.0317467	0.15012	Roots
KDPE	Weeks	Weeks	-0.198803	0.0900162	96	0.032588	0.150596	Roots
MDTG	TET_density	TET_density	3.32099	1.5031	17	0.0325202	0.150596	Roots
MEXC	Germfree	Germfree	0.323539	0.146491	88	0.0325829	0.150596	Roots
OMP36	TET_density_Weeks	TET_density_Weeks	-1.4417	0.651334	5	0.0322215	0.150596	Roots
ROSB	TET_density_Weeks	TET_density_Weeks	-0.831589	0.375988	96	0.0323482	0.150596	Roots
TRANSCRIPTIONAL_REGULATORY_PROTEIN_CPXR_CPXR	Germfree	Germfree	-0.0767231	0.0346791	96	0.0323019	0.150596	Roots
PVRR	TET_density	TET_density	2.82436	1.28269	77	0.0330845	0.152314	Roots
ADC-12	Germfree	Germfree	-0.106865	0.048881	7	0.0342902	0.156115	Roots
MDSB	Germfree	Germfree	0.144959	0.0663072	96	0.034294	0.156115	Roots
OMP36	TET_density	TET_density	1.39486	0.637083	5	0.0340392	0.156115	Roots
LRA	Weeks	Weeks	-0.190481	0.0872834	96	0.0345951	0.1569	Roots
MUXB	TET_density	TET_density	0.820497	0.383604	96	0.0351201	0.158105	Roots
MUXC	TET_density_Weeks	TET_density_Weeks	-0.914332	0.427258	96	0.0350303	0.158105	Roots
RM3	Weeks	Weeks	-0.266302	0.12515	32	0.0360515	0.161702	Roots
VANZ	TET_density	TET_density	1.91011	0.884345	19	0.0363989	0.162662	Roots
MDTG	TET_density_Weeks	TET_density_Weeks	-3.30044	1.53672	17	0.0374142	0.166589	Roots
KASUGAMYCIN_RESISTANCE_PROTEIN_KSGA	Weeks	Weeks	0.431772	0.201287	48	0.0376392	0.166981	Roots
STAPHYLOCOCCUS_MUPA_CONFERRING_RESISTANCE_TO_MUPIROCIN	Germfree	Germfree	0.336261	0.156897	45	0.0377968	0.167073	Roots
ACRD	Weeks	Weeks	0.40195	0.188285	89	0.0385179	0.169646	Roots
MEXZ	Weeks	Weeks	-0.522695	0.24564	55	0.0391193	0.171059	Roots
MSBA	TET_density_Weeks	TET_density_Weeks	-0.904481	0.424929	96	0.0390615	0.171059	Roots
PORIN_OMPC	TET_density_Weeks	TET_density_Weeks	-1.71909	0.809825	6	0.0395688	0.172407	Roots
TET(42)	Weeks	Weeks	-0.35075	0.165506	65	0.0398824	0.173155	Roots
ACRA	Germfree	Germfree	-0.292987	0.138391	85	0.040075	0.173374	Roots
ESCHERICHIA_COLI_LAMB	TET_density_Weeks	TET_density_Weeks	-3.01317	1.42791	17	0.0406977	0.175446	Roots
OPRJ	Germfree	Germfree	0.1449	0.0699718	16	0.0412068	0.177015	Roots
TET(33)	Weeks	Weeks	0.225049	0.109014	23	0.0418256	0.179043	Roots
CMEB	Weeks	Weeks	-0.310622	0.14871	87	0.0426834	0.181462	Roots
TETG	Weeks	Weeks	-0.408683	0.195662	57	0.0426882	0.181462	Roots
DFRB2	Weeks	Weeks	0.148136	0.0721671	11	0.0429754	0.182048	Roots
PORIN_OMPC	TET_density	TET_density	1.64969	0.792108	6	0.0432656	0.182644	Roots
PVRR	TET_density_Weeks	TET_density_Weeks	-2.72462	1.31138	77	0.0437445	0.184028	Roots
BRUCELLA_SUIS_MPRF	Weeks	Weeks	0.320321	0.154738	35	0.0444843	0.186498	Roots
CMRA	TET_density	TET_density	2.04177	1.00477	29	0.0450615	0.186654	Roots
EMRD	TET_density_Weeks	TET_density_Weeks	-2.59809	1.25906	15	0.0451336	0.186654	Roots
MEXA	TET_density	TET_density	2.95539	1.43212	96	0.0451204	0.186654	Roots
OTRA	Weeks	Weeks	-0.39879	0.19308	91	0.0449448	0.186654	Roots
CMRA	TET_density_Weeks	TET_density_Weeks	-2.08184	1.02724	29	0.0456274	0.186797	Roots
MUXB	TET_density_Weeks	TET_density_Weeks	-0.795175	0.392184	96	0.0455306	0.186797	Roots
VATF	Weeks	Weeks	0.312138	0.151519	89	0.0454779	0.186797	Roots
AAC(3)-IIIA	TET_density_Weeks	TET_density_Weeks	-3.22429	1.57224	78	0.0464155	0.188756	Roots
ESCHERICHIA_COLI_LAMB	TET_density	TET_density	2.86462	1.39667	17	0.0463875	0.188756	Roots
LSAE	TET_density_Weeks	TET_density_Weeks	2.57131	1.26029	44	0.0474973	0.192514	Roots
AAC(3)-IIIA	TET_density	TET_density	3.1297	1.53784	78	0.048032	0.194037	Roots
EMRR	TET_density_Weeks	TET_density_Weeks	-2.73965	1.34745	14	0.0482331	0.194206	Roots
MEXS	TET_density	TET_density	2.26511	1.13291	49	0.0485509	0.194273	Roots
TRIA	Germfree	Germfree	0.123834	0.0619413	8	0.0485682	0.194273	Roots
EMRD	TET_density	TET_density	2.47765	1.23152	15	0.0505262	0.201444	Roots
MSBA	TET_density	TET_density	0.827121	0.415632	96	0.0529699	0.21013	Roots
OPMH	TET_density	TET_density	3.19902	1.60808	93	0.0530493	0.21013	Roots
EMRR	TET_density	TET_density	2.60303	1.31797	14	0.0547067	0.215994	Roots
ADC-43	Weeks	Weeks	-0.222687	0.11298	17	0.0551793	0.217157	Roots
ARR-8	Germfree	Germfree	-0.0842008	0.0435936	9	0.0565339	0.221773	Roots
ADC-41	Weeks	Weeks	-0.138915	0.0710345	7	0.05703	0.223002	Roots
LLMA_23S_RIBOSOMAL_RNA_METHYLTRANSFERASE	Germfree	Germfree	0.242673	0.124635	87	0.0580756	0.226365	Roots
SDIA	TET_density	TET_density	2.62142	1.35129	15	0.0589647	0.229099	Roots
MEXA	TET_density_Weeks	TET_density_Weeks	-2.83659	1.46416	96	0.0592888	0.229626	Roots
BICYCLOMYCIN-MULTIDRUG_EFFLUX_PROTEIN_BCR	TET_density_Weeks	TET_density_Weeks	-2.86821	1.48647	16	0.0602778	0.232718	Roots
TAEA	Germfree	Germfree	0.343865	0.179064	67	0.0614622	0.236393	Roots
YOJI	TET_density	TET_density	3.17355	1.65362	20	0.0616171	0.236393	Roots
GOB-1	Germfree	Germfree	-0.269509	0.140542	51	0.0618143	0.236406	Roots
BAER	TET_density	TET_density	3.09255	1.61724	77	0.0625223	0.237781	Roots
LRFA	Germfree	Germfree	-0.248555	0.130003	27	0.0625637	0.237781	Roots
ACRF	Weeks	Weeks	0.148968	0.0786583	96	0.0649828	0.24286	Roots
CMRA	Germfree	Germfree	-0.186011	0.0994943	29	0.0647598	0.24286	Roots
MEXR	TET_density	TET_density	2.17586	1.14838	59	0.0648672	0.24286	Roots
MEXS	TET_density_Weeks	TET_density_Weeks	-2.16347	1.15825	49	0.0649979	0.24286	Roots
SDIA	TET_density_Weeks	TET_density_Weeks	-2.61528	1.38152	15	0.0650944	0.24286	Roots
YOJI	TET_density_Weeks	TET_density_Weeks	-3.21041	1.69061	20	0.064291	0.24286	Roots
BAES	TET_density_Weeks	TET_density_Weeks	-2.97038	1.57625	19	0.0662735	0.246505	Roots
MDTC	TET_density_Weeks	TET_density_Weeks	-0.689258	0.366195	96	0.066585	0.246911	Roots
BICYCLOMYCIN-MULTIDRUG_EFFLUX_PROTEIN_BCR	TET_density	TET_density	2.73379	1.45395	16	0.0668586	0.247174	Roots
KLEBSIELLA_PNEUMONIAE_OMPK36	TET_density_Weeks	TET_density_Weeks	-1.5229	0.813155	8	0.0679011	0.247713	Roots
MDTC	TET_density	TET_density	0.670515	0.358183	96	0.0680195	0.247713	Roots
MEXR	TET_density_Weeks	TET_density_Weeks	-2.199	1.17407	59	0.0678798	0.247713	Roots
OPMH	TET_density_Weeks	TET_density_Weeks	-3.08035	1.64405	93	0.0677868	0.247713	Roots
VANZ	TET_density_Weeks	TET_density_Weeks	-1.6937	0.904126	19	0.0678338	0.247713	Roots
RIFAMPIN_MONOOXYGENASE	Germfree	Germfree	-0.141079	0.0754283	96	0.0682488	0.247808	Roots
