# Supplementary material for: Temporal Dynamics Dominates Microbiome and Resistome Assembly Despite Tetracycline Pressure in a Germfree Lettuce Model
Source: Research Square preprint supplement (doi:10.21203/rs.3.rs-8401048/v1), 2025-12-24
Supplement: Supplementary file 3 [file e334ef469e7470799adf5ac5.xlsx]

## Sheet: Sheet1
Samples	Salmonella	TET	Germfree	Weeks	Parts	TET_density	k__Bacteria|p__Proteobacteria|c__Betaproteobacteria|o__Burkholderiales|f__Comamonadaceae|g__Diaphorobacter|s__[Acidovorax]_ebreus	k__Bacteria|p__Proteobacteria|c__Epsilonproteobacteria|o__Campylobacterales|f__Arcobacteraceae|g__Aliarcobacter|s__[Arcobacter]_porcinus	k__Bacteria|p__Firmicutes|c__Bacilli|o__Bacillales|f__Bacillaceae|g__Geobacillus|s__[Bacillus]_caldolyticus	k__Bacteria|p__Firmicutes|c__Clostridia|o__Eubacteriales|f__Lachnospiraceae|g__Tyzzerella|s__[Clostridium]_colinum	k__Bacteria|p__Firmicutes|c__Clostridia|o__Eubacteriales|f__Lachnospiraceae|g__Lachnoclostridium|s__[Clostridium]_hylemonae	k__Bacteria|p__Firmicutes|c__Erysipelotrichia|o__Erysipelotrichales|f__Erysipelotrichaceae|g__Erysipelatoclostridium|s__[Clostridium]_innocuum	k__Bacteria|p__Firmicutes|c__Clostridia|o__Eubacteriales|f__Lachnospiraceae|g__Lachnoclostridium|s__[Clostridium]_scindens	k__Bacteria|p__Firmicutes|c__Erysipelotrichia|o__Erysipelotrichales|f__Erysipelotrichaceae|g__Erysipelatoclostridium|s__[Clostridium]_spiroforme	k__Bacteria|p__Proteobacteria|c__Gammaproteobacteria|o__Enterobacterales|f__Enterobacteriaceae|g__Pluralibacter|s__[Enterobacter]_lignolyticus	k__Bacteria|p__Proteobacteria|c__Gammaproteobacteria|o__Pasteurellales|f__Pasteurellaceae|g__Haemophilus|s__[Haemophilus]_ducreyi	k__Bacteria|p__Proteobacteria|c__Gammaproteobacteria|o__Pasteurellales|f__Pasteurellaceae|g__Basfia|s__[Mannheimia]_succiniciproducens	k__Bacteria|p__Actinobacteria|c__Actinomycetia|o__Corynebacteriales|f__Mycobacteriaceae|g__Mycobacteroides|s__[Mycobacterium]_stephanolepidis	k__Bacteria|p__Tenericutes|o__Mycoplasmoidales|f__Metamycoplasmataceae|g__Metamycoplasma|s__[Mycoplasma]_phocidae	k__Bacteria|p__Proteobacteria|c__Alphaproteobacteria|o__Hyphomicrobiales|f__Brucellaceae|g__Brucella|s__[Ochrobactrum]_quorumnocens	k__Bacteria|p__Proteobacteria|c__Gammaproteobacteria|o__Enterobacterales|f__Erwiniaceae|g__Erwinia|s__[Pantoea]_beijingensis	k__Bacteria|p__Cyanobacteria|o__Oscillatoriales|g__Koinonema|s__[Phormidium]_sp._ETS-05	k__Bacteria|p__Proteobacteria|c__Gammaproteobacteria|o__Pseudomonadales|f__Pseudomonadaceae|g__Stutzerimonas|s__[Pseudomonas]_zhaodongensis	k__Bacteria|p__Firmicutes|c__Clostridia|o__Eubacteriales|f__Lachnospiraceae|g__Mediterraneibacter|s__[Ruminococcus]_gnavus	k__Bacteria|p__Firmicutes|c__Clostridia|o__Eubacteriales|f__Lachnospiraceae|g__Mediterraneibacter|s__[Ruminococcus]_lactaris	k__Bacteria|p__Firmicutes|c__Clostridia|o__Eubacteriales|f__Lachnospiraceae|g__Mediterraneibacter|s__[Ruminococcus]_torques	k__Bacteria|p__Firmicutes|c__Bacilli|o__Lactobacillales|f__Aerococcaceae|g__Abiotrophia|s__Abiotrophia_defectiva	k__Bacteria|p__Bacteroidota|c__Flavobacteriia|o__Flavobacteriales|f__Flavobacteriaceae|g__Abyssalbus|s__Abyssalbus_ytuae	k__Bacteria|p__Firmicutes|c__Bacilli|o__Bacillales|f__Staphylococcaceae|g__Abyssicoccus|s__Abyssicoccus_albus	k__Bacteria|p__Proteobacteria|c__Gammaproteobacteria|s__Abyssogena_phaseoliformis_symbiont	k__Bacteria|p__Cyanobacteria|o__Synechococcales|f__Acaryochloridaceae|g__Acaryochloris|s__Acaryochloris_marina	k__Bacteria|p__Cyanobacteria|o__Synechococcales|f__Acaryochloridaceae|g__Acaryochloris|s__Acaryochloris_sp._'Moss_Beach'	k__Bacteria|p__Firmicutes|c__Bacilli|o__Lactobacillales|f__Lactobacillaceae|g__Acetilactobacillus|s__Acetilactobacillus_jinshanensis	k__Bacteria|p__Firmicutes|c__Clostridia|o__Eubacteriales|f__Oscillospiraceae|g__Acetivibrio|s__Acetivibrio_clariflavus	k__Bacteria|p__Firmicutes|c__Clostridia|o__Eubacteriales|f__Oscillospiraceae|g__Acetivibrio|s__Acetivibrio_saccincola	k__Bacteria|p__Firmicutes|c__Clostridia|o__Eubacteriales|f__Oscillospiraceae|g__Acetivibrio|s__Acetivibrio_thermocellus	k__Bacteria|p__Firmicutes|c__Clostridia|o__Eubacteriales|f__Peptostreptococcaceae|g__Acetoanaerobium|s__Acetoanaerobium_sticklandii	k__Bacteria|p__Proteobacteria|c__Alphaproteobacteria|o__Rhodospirillales|f__Acetobacteraceae|g__Acetobacter|s__Acetobacter_aceti	k__Bacteria|p__Proteobacteria|c__Alphaproteobacteria|o__Rhodospirillales|f__Acetobacteraceae|g__Acetobacter|s__Acetobacter_ascendens	k__Bacteria|p__Proteobacteria|c__Alphaproteobacteria|o__Rhodospirillales|f__Acetobacteraceae|g__Acetobacter|s__Acetobacter_ghanensis	k__Bacteria|p__Proteobacteria|c__Alphaproteobacteria|o__Rhodospirillales|f__Acetobacteraceae|g__Acetobacter|s__Acetobacter_orientalis	k__Bacteria|p__Proteobacteria|c__Alphaproteobacteria|o__Rhodospirillales|f__Acetobacteraceae|g__Acetobacter|s__Acetobacter_oryzifermentans	k__Bacteria|p__Proteobacteria|c__Alphaproteobacteria|o__Rhodospirillales|f__Acetobacteraceae|g__Acetobacter|s__Acetobacter_oryzoeni	k__Bacteria|p__Proteobacteria|c__Alphaproteobacteria|o__Rhodospirillales|f__Acetobacteraceae|g__Acetobacter|s__Acetobacter_pasteurianus	k__Bacteria|p__Proteobacteria|c__Alphaproteobacteria|o__Rhodospirillales|f__Acetobacteraceae|g__Acetobacter|s__Acetobacter_persici	k__Bacteria|p__Proteobacteria|c__Alphaproteobacteria|o__Rhodospirillales|f__Acetobacteraceae|g__Acetobacter|s__Acetobacter_pomorum	k__Bacteria|p__Proteobacteria|c__Alphaproteobacteria|o__Rhodospirillales|f__Acetobacteraceae|g__Acetobacter|s__Acetobacter_senegalensis	k__Bacteria|p__Proteobacteria|c__Alphaproteobacteria|o__Rhodospirillales|f__Acetobacteraceae|g__Acetobacter|s__Acetobacter_sp._KACC_21233	k__Bacteria|p__Proteobacteria|c__Alphaproteobacteria|o__Rhodospirillales|f__Acetobacteraceae|g__Acetobacter|s__Acetobacter_tropicalis
sW1GLCL1	1	0	1	1	Leaves	0	0	23	0	37	0	23	20	35	12	19	0	0	17	0	0	1226	0	17	0	0	0	26	21	0	1011	0	10	40	44	27	15	0	0	0	0	0	0	0	0	0	0	0	0
sW1GLCL2	1	0	1	1	Leaves	0	0	44	0	42	0	31	17	39	13	23	0	0	22	0	0	1033	0	0	0	0	0	30	18	10	976	0	0	37	59	30	12	0	0	0	0	0	0	0	0	0	0	0	0
sW1GLCR1	1	0	1	1	Roots	0	542	20	157	31	119	105	147	51	282	37	61	156	0	339	101	125	421	101	22	30	50	317	16	14	123	29	0	77	56	49	28	1519	201	265	96	0	91	353	308	0	205	304	208
sW1GLCR2	1	0	1	1	Roots	0	701	31	0	25	82	102	136	42	329	42	0	181	0	199	104	113	341	67	21	42	51	203	20	14	113	27	0	72	52	47	26	1171	183	226	94	0	36	226	264	412	157	262	107
sW1GLCS1	1	0	1	1	Soils	0	788	14	0	0	55	50	60	27	190	35	0	97	0	281	67	61	503	39	26	22	48	368	0	0	72	0	0	63	12	23	30	1003	158	147	105	0	78	280	226	0	135	258	157
sW1GLCS2	1	0	1	1	Soils	0	984	0	0	16	60	75	79	35	256	38	51	115	0	420	68	96	488	57	34	31	20	351	0	14	82	21	0	62	35	42	14	1183	176	351	104	113	103	301	264	0	144	373	206
sW1GLT1L1	1	1	1	1	Leaves	4	0	47	0	66	14	44	32	54	11	22	0	0	34	0	0	1484	0	15	0	17	0	25	28	0	1287	0	0	55	79	31	15	0	0	0	0	0	0	0	0	0	0	0	0
sW1GLT1L2	1	1	1	1	Leaves	4	0	22	0	31	0	22	0	25	0	24	0	0	14	0	0	413	0	43	0	76	0	12	0	0	437	0	0	32	45	12	0	0	0	0	0	0	0	0	0	0	0	0	0
sW1GLT1R1	1	1	1	1	Roots	4	558	32	0	12	118	130	144	39	283	29	0	172	0	276	102	140	392	99	34	45	36	338	17	12	127	47	17	61	63	57	21	1473	256	252	98	0	35	268	312	447	145	371	136
sW1GLT1R2	1	1	1	1	Roots	4	618	0	0	18	71	142	85	22	219	36	0	130	0	302	58	107	325	70	12	18	28	394	13	11	86	30	13	61	50	38	19	1369	237	231	102	0	76	366	272	0	231	344	177
sW1GLT1S1	1	1	1	1	Soils	4	724	21	0	11	45	61	83	29	180	16	0	81	0	214	83	72	364	58	21	25	41	425	0	0	79	0	0	67	27	28	18	698	130	86	89	101	34	188	171	0	135	204	53
sW1GLT1S2	1	1	1	1	Soils	4	623	20	0	40	32	65	149	35	105	18	0	74	0	132	54	84	418	23	29	19	45	379	10	0	80	37	11	49	28	26	32	364	45	55	32	0	33	101	100	0	248	137	39
sW1GLT2L1	1	1	1	1	Leaves	4	0	41	0	40	0	55	38	42	18	22	0	0	20	0	0	1140	0	459	0	19	0	16	0	0	996	0	0	57	51	38	16	0	0	0	0	0	0	0	0	0	0	0	0
sW1GLT2L2	1	1	1	1	Leaves	4	0	53	0	54	12	39	20	42	10	16	0	0	26	0	0	1231	0	679	0	25	0	27	11	0	948	0	15	40	53	31	14	0	0	0	0	0	0	0	0	0	0	0	0
sW1GLT2R1	1	1	1	1	Roots	4	709	0	0	15	127	128	111	29	315	24	0	150	0	303	110	151	406	62	20	33	48	263	0	0	133	31	14	78	48	62	18	1507	260	318	129	0	79	354	316	0	280	355	246
sW1GLT2R2	1	1	1	1	Roots	4	623	21	142	22	88	106	111	30	359	38	0	193	0	284	117	150	422	1145	17	38	66	259	17	12	155	35	0	65	45	61	24	1409	233	300	99	0	104	355	277	0	178	316	177
sW1GLT2S1	1	1	1	1	Soils	4	767	15	0	23	65	96	133	57	180	19	0	97	0	132	72	54	369	82	36	27	17	309	0	0	74	24	16	74	39	30	34	617	102	86	79	0	50	249	195	0	134	161	78
sW1GLT2S2	1	1	1	1	Soils	4	814	24	0	32	90	145	211	143	175	15	0	110	0	160	54	77	590	261	106	400	25	275	35	0	83	22	10	75	51	32	19	477	97	58	59	112	44	162	166	0	86	157	41
sW1GLT3L1	1	1	1	1	Leaves	4	0	42	0	39	0	32	19	27	19	13	0	0	13	0	0	1040	0	13	0	0	0	21	15	17	995	0	0	45	49	23	12	0	0	0	0	0	0	0	0	0	0	0	0
sW1GLT3L2	1	1	1	1	Leaves	4	0	39	0	41	0	33	26	31	0	27	0	0	14	0	0	2165	0	25	0	42	0	27	19	0	1645	0	0	27	51	34	18	0	0	0	0	0	0	0	0	0	0	0	0
sW1GLT3R1	1	1	1	1	Roots	4	434	47	121	25	93	118	127	52	235	22	0	131	0	190	95	139	399	122	40	66	40	248	17	12	136	50	10	118	55	55	39	1158	161	180	92	141	60	220	235	0	160	282	127
sW1GLT3R2	1	1	1	1	Roots	4	653	26	0	16	115	118	126	18	381	52	0	147	0	336	119	125	391	94	23	46	34	311	0	0	109	28	0	91	51	66	20	1727	306	303	125	0	75	452	319	0	260	374	242
sW1GLT3S1	1	1	1	1	Soils	4	659	0	0	0	18	68	37	12	134	10	0	62	0	139	65	32	348	18	24	29	17	276	0	0	40	0	0	50	22	13	13	378	59	47	47	0	37	123	80	0	80	103	47
sW1GLT3S2	1	1	1	1	Soils	4	462	25	0	17	57	71	330	34	126	19	0	69	0	210	44	164	420	36	16	18	19	371	14	0	70	29	0	86	28	20	13	412	79	75	70	0	0	158	124	0	142	200	58
sW1NLCL1	1	0	0	1	Leaves	0	0	38	0	40	12	24	18	31	13	30	0	0	28	0	0	1609	0	15	0	13	0	18	23	0	1265	0	0	32	35	23	11	0	0	0	0	0	0	0	0	0	0	0	0
sW1NLCL2	1	0	0	1	Leaves	0	0	27	0	23	0	26	13	17	0	14	0	0	15	0	0	891	19	0	0	0	0	12	10	0	820	0	0	35	43	21	0	0	0	0	0	0	0	0	0	0	0	0	0
sW1NLCR1	1	0	0	1	Roots	0	584	21	181	23	107	81	118	23	252	34	0	144	0	202	81	101	382	58	15	24	54	249	0	0	123	36	13	73	68	42	25	964	173	178	73	0	101	235	203	0	157	235	115
sW1NLCR2	1	0	0	1	Roots	0	649	18	176	16	101	116	116	19	309	35	0	152	0	212	93	118	357	77	20	45	0	224	28	0	121	35	0	68	34	46	19	1031	118	230	72	158	48	221	202	0	114	256	143
sW1NLCS1	1	0	0	1	Soils	0	654	0	0	22	164	133	144	36	598	37	0	269	0	366	83	142	599	103	34	55	48	419	15	10	180	54	0	65	57	59	31	1633	232	250	121	0	125	393	315	0	165	421	262
sW1NLCS2	1	0	0	1	Soils	0	695	22	0	17	139	123	155	40	463	40	78	213	0	350	107	138	672	105	30	40	51	400	20	11	159	41	15	73	66	61	19	1770	173	295	103	0	59	276	359	449	145	344	184
sW1NLT1L1	1	1	0	1	Leaves	4	0	52	0	52	14	72	11	40	0	19	0	0	16	0	0	1916	0	118	0	201	0	28	20	0	1611	0	13	35	57	37	12	0	0	0	0	0	0	0	0	0	0	0	0
sW1NLT1L2	1	1	0	1	Leaves	4	0	25	0	33	11	22	19	30	0	13	0	0	18	0	0	1337	0	0	0	0	0	20	0	0	1096	0	0	23	38	13	0	23	0	0	0	0	0	0	0	0	0	0	0
sW1NLT1R1	1	1	0	1	Roots	4	583	26	0	29	96	85	130	33	257	25	0	145	0	175	89	125	307	85	32	47	0	223	16	18	114	30	0	54	45	39	16	917	132	183	66	0	73	268	183	0	181	192	117
sW1NLT1R2	1	1	0	1	Roots	4	740	0	0	23	87	100	108	22	276	28	0	151	0	189	94	118	405	86	11	30	37	239	14	19	112	40	11	57	41	53	21	1071	142	187	88	0	95	275	216	0	192	223	152
sW1NLT1S1	1	1	0	1	Soils	4	834	0	0	14	134	185	181	36	587	34	73	219	0	301	125	165	622	66	20	40	47	410	18	13	196	55	15	73	79	87	29	1882	224	231	115	180	137	453	351	0	209	394	244
sW1NLT1S2	1	1	0	1	Soils	4	566	0	0	20	125	155	155	26	496	42	75	184	0	315	79	150	597	82	19	42	37	504	19	0	154	43	13	63	57	66	21	1693	182	247	107	144	115	353	331	0	176	372	251
sW1NLT2L1	1	1	0	1	Leaves	4	0	38	0	37	11	37	14	39	11	19	0	0	14	0	10	1885	0	0	0	0	0	22	12	0	1608	0	0	33	47	27	23	31	0	0	0	0	0	0	0	0	0	0	0
sW1NLT2L2	1	1	0	1	Leaves	4	0	26	0	41	0	26	18	22	14	25	0	0	24	0	0	2074	0	15	0	18	0	34	10	0	1681	0	0	30	47	27	12	0	0	0	0	0	0	0	0	0	0	0	0
sW1NLT2R1	1	1	0	1	Roots	4	602	25	0	28	82	109	123	26	201	31	0	133	0	173	76	96	248	67	26	22	33	267	15	11	98	29	0	63	45	51	23	858	137	177	49	0	89	243	198	0	154	215	136
sW1NLT2R2	1	1	0	1	Roots	4	1002	19	0	17	126	124	108	22	343	41	0	184	0	294	113	136	421	65	13	23	75	218	13	11	118	28	0	44	35	54	14	1286	152	247	85	57	62	236	302	420	130	372	132
sW1NLT2S1	1	1	0	1	Soils	4	835	16	0	26	94	109	123	41	327	38	0	206	0	328	120	98	384	104	16	32	40	549	23	0	94	36	11	108	82	71	30	1288	149	149	70	0	81	284	253	371	113	349	134
sW1NLT2S2	1	1	0	1	Soils	4	708	24	0	25	116	115	187	31	392	42	0	223	0	313	94	143	460	140	22	77	86	598	31	0	110	36	11	160	70	114	66	1493	156	195	65	0	50	342	288	424	121	391	126
sW1NLT3L1	1	1	0	1	Leaves	4	0	0	0	11	0	17	0	17	0	22	0	0	12	0	0	595	0	16	0	17	0	12	0	0	499	0	0	19	19	10	0	0	0	0	0	0	0	0	0	0	0	0	0
sW1NLT3L2	1	1	0	1	Leaves	4	0	30	0	42	13	53	24	34	11	23	0	0	16	0	0	1442	0	168	0	124	0	22	0	0	1273	0	0	33	50	19	10	0	0	0	0	0	0	0	0	0	0	0	0
sW1NLT3R1	1	1	0	1	Roots	4	465	17	0	22	87	98	96	25	193	24	0	117	0	230	79	99	287	46	13	46	37	203	22	0	100	27	0	65	46	51	20	867	137	155	87	0	85	249	170	0	154	229	86
sW1NLT3R2	1	1	0	1	Roots	4	1083	0	129	17	136	112	134	26	340	31	0	205	0	305	130	125	424	58	21	33	42	383	14	10	114	39	12	67	32	68	23	1387	195	280	75	0	102	359	288	0	171	333	161
sW1NLT3S1	1	1	0	1	Soils	4	837	14	0	28	158	152	180	34	426	37	0	262	13	427	128	157	465	84	17	48	54	500	36	21	128	41	13	137	74	73	48	1361	194	230	104	49	40	345	298	405	147	442	136
sW1NLT3S2	1	1	0	1	Soils	4	895	22	0	31	103	103	137	39	329	40	0	206	13	407	128	133	504	102	15	70	42	674	12	13	87	33	14	97	69	78	37	1073	137	170	75	0	35	220	249	408	93	292	124
sW3GLCL1	1	0	1	3	Leaves	0	0	14	0	26	0	23	12	28	0	14	0	0	0	0	0	152	0	16	0	0	0	12	0	0	252	0	0	27	39	16	0	0	0	0	0	0	0	0	0	0	0	0	0
sW3GLCL2	1	0	1	3	Leaves	0	0	38	0	48	0	35	17	24	0	27	0	0	13	0	0	817	38	20	0	12	0	26	20	0	766	0	0	36	49	28	0	0	0	0	0	0	0	0	0	0	0	0	0
sW3GLCR1	1	0	1	3	Roots	0	835	25	154	0	136	118	155	29	510	65	0	253	0	344	119	208	495	77	13	54	85	239	0	11	132	46	0	54	37	45	16	1665	263	294	99	0	93	508	359	0	259	445	288
sW3GLCR2	1	0	1	3	Roots	0	683	29	0	18	89	105	109	26	315	45	0	143	0	252	98	158	330	1128	20	22	47	172	15	11	146	30	13	50	33	45	22	1214	153	253	93	0	105	327	242	0	144	320	189
sW3GLCS1	1	0	1	3	Soils	0	1417	0	0	17	80	124	108	37	406	39	0	170	0	403	96	153	519	71	17	44	60	309	0	0	105	23	18	56	35	49	0	1677	222	264	108	0	92	443	366	0	212	446	227
sW3GLCS2	1	0	1	3	Soils	0	1053	19	0	23	67	50	124	42	356	37	0	169	0	295	103	66	531	56	13	34	33	212	0	0	113	0	0	49	40	28	12	1112	124	183	74	0	92	221	221	352	94	343	72
sW3GLT1L1	1	1	1	3	Leaves	2	0	24	0	31	0	29	12	24	0	25	0	0	17	0	0	428	0	18	0	38	0	17	0	0	489	0	0	24	42	20	0	0	0	0	0	0	0	0	0	0	0	0	0
sW3GLT1L2	1	1	1	3	Leaves	2	0	41	0	66	12	49	45	42	15	21	0	0	17	0	0	473	0	103	0	259	0	28	20	0	603	0	15	58	77	35	18	28	0	0	0	0	0	0	0	0	0	0	0
sW3GLT1R1	1	1	1	3	Roots	2	509	31	0	31	98	91	93	48	209	30	0	117	0	181	60	102	299	42	20	31	36	143	17	0	158	0	0	38	45	44	23	948	148	166	69	0	67	262	181	0	128	226	146
sW3GLT1R2	1	1	1	3	Roots	2	649	29	0	0	118	136	144	27	312	36	0	145	0	228	100	155	404	1332	11	23	0	218	0	0	134	30	0	47	53	54	18	1315	163	223	90	157	76	284	280	0	197	248	147
sW3GLT1S1	1	1	1	3	Soils	2	861	41	0	24	63	91	94	43	337	34	0	160	0	378	82	104	634	64	18	29	32	303	12	12	80	24	14	68	31	15	14	1093	146	157	96	0	74	179	278	352	124	309	123
sW3GLT1S2	1	1	1	3	Soils	2	1351	36	0	31	86	98	156	45	418	30	0	168	0	338	136	126	459	51	22	18	64	274	12	0	111	33	11	68	44	37	13	1452	225	195	104	0	89	392	290	0	164	429	180
sW3GLT2L1	1	1	1	3	Leaves	4	0	36	0	46	0	20	20	28	14	22	0	0	23	0	0	651	0	0	0	0	0	20	23	0	700	0	0	39	52	20	13	0	0	0	0	0	0	0	0	0	0	0	0
sW3GLT2L2	1	1	1	3	Leaves	4	0	38	0	48	0	29	15	39	0	29	0	0	21	0	0	999	0	0	0	0	0	27	0	0	926	0	0	32	45	31	20	0	0	0	0	0	0	0	0	0	0	0	0
sW3GLT2R1	1	1	1	3	Roots	4	690	36	184	28	115	85	121	50	335	42	0	158	15	261	96	189	372	56	18	32	45	218	17	13	188	0	14	73	69	55	27	1319	170	217	75	0	97	338	236	0	178	322	158
sW3GLT2R2	1	1	1	3	Roots	4	477	41	0	32	65	64	82	25	228	26	0	106	15	169	62	122	292	65	17	28	32	211	19	0	127	34	10	43	43	109	20	908	150	143	61	0	63	296	207	0	148	232	121
sW3GLT2S1	1	1	1	3	Soils	4	1137	28	0	18	123	97	142	25	394	37	0	177	0	324	105	122	636	82	18	28	54	317	0	0	124	24	28	74	33	130	11	1546	183	210	88	0	66	293	274	455	90	355	131
sW3GLT2S2	1	1	1	3	Soils	4	1098	24	0	33	57	116	102	49	197	21	0	99	0	568	87	92	365	61	33	29	47	383	22	0	103	0	17	70	35	27	23	1304	167	229	120	0	96	502	284	0	154	359	190
sW3GLT3L1	1	1	1	3	Leaves	16	0	31	0	44	0	42	21	22	14	20	0	0	23	0	0	419	0	0	0	0	0	28	10	0	513	0	0	44	49	23	16	0	0	0	0	0	0	0	0	0	0	0	0
sW3GLT3L2	1	1	1	3	Leaves	16	0	59	0	59	0	32	24	41	15	30	0	0	26	0	0	500	0	391	0	16	0	26	22	12	665	0	14	57	67	17	19	0	0	0	0	0	0	0	0	0	0	0	0
sW3GLT3R1	1	1	1	3	Roots	16	860	0	0	27	101	84	124	30	421	29	0	192	0	354	136	168	446	55	19	33	68	230	12	12	127	39	11	68	39	54	10	1630	205	301	96	87	82	305	298	449	141	405	156
sW3GLT3R2	1	1	1	3	Roots	16	885	26	0	14	85	59	99	34	312	34	0	141	0	246	73	107	347	31	20	25	41	161	0	0	120	22	10	41	49	34	18	1098	129	192	82	0	100	251	230	0	118	275	171
sW3GLT3S1	1	1	1	3	Soils	16	771	0	0	10	40	68	77	39	331	14	0	112	0	361	72	98	593	23	17	0	44	256	0	0	102	0	14	64	22	34	0	821	93	141	60	0	47	157	218	331	73	255	77
sW3GLT3S2	1	1	1	3	Soils	16	1139	48	0	12	102	113	130	43	424	71	0	181	0	316	120	162	659	58	16	36	49	361	0	15	127	0	12	78	29	44	10	1310	191	190	77	0	67	292	263	481	90	342	115
sW3NLCL1	1	0	0	3	Leaves	0	0	58	0	58	0	21	17	21	0	11	0	0	30	0	0	752	0	0	0	14	0	22	20	0	786	20	0	33	57	33	17	21	0	0	0	0	0	0	0	0	0	0	0
sW3NLCL2	1	0	0	3	Leaves	0	0	35	0	43	0	38	18	31	11	26	0	0	20	0	0	776	25	317	0	20	0	23	22	0	783	0	0	24	45	24	11	29	0	0	0	0	0	0	0	0	0	0	0
sW3NLCR1	1	0	0	3	Roots	0	771	29	214	25	149	147	147	29	381	44	0	156	0	250	105	195	563	127	30	73	84	259	25	16	182	36	19	83	72	85	32	1389	207	321	81	0	67	360	287	0	213	345	244
sW3NLCR2	1	0	0	3	Roots	0	774	32	0	25	131	129	128	34	298	37	0	177	0	241	102	171	433	77	15	54	91	211	22	21	166	38	22	90	69	69	21	1156	132	208	72	0	46	189	244	384	114	291	129
sW3NLCS1	1	0	0	3	Soils	0	1098	20	0	12	162	125	176	27	643	53	0	225	0	269	101	172	612	87	23	32	58	245	16	12	136	53	0	45	51	42	14	2120	249	315	117	0	146	495	403	511	166	448	140
sW3NLCS2	1	0	0	3	Soils	0	1031	0	174	26	175	138	154	29	649	65	65	228	0	466	133	175	614	99	42	48	0	372	13	27	202	0	10	74	45	59	19	1895	277	277	119	82	61	310	351	456	152	445	184
sW3NLT1L1	1	1	0	3	Leaves	2	0	43	0	37	14	39	0	28	14	22	0	0	18	0	0	446	0	15	0	19	0	22	21	0	573	0	0	42	47	33	21	0	0	0	0	0	0	0	0	0	0	0	0
sW3NLT1L2	1	1	0	3	Leaves	2	0	22	0	28	33	91	152	24	0	22	0	0	0	0	0	224	34	101	43	281	0	10	0	0	305	0	0	26	32	12	0	39	0	0	0	0	0	0	0	0	0	0	0
sW3NLT1R1	1	1	0	3	Roots	2	875	23	157	23	152	159	158	20	399	57	0	192	0	321	149	180	540	83	20	70	46	236	26	16	175	28	0	81	53	64	18	1407	179	306	83	0	122	343	286	0	216	328	250
sW3NLT1R2	1	1	0	3	Roots	2	1156	36	177	24	146	155	158	26	454	67	0	215	0	377	154	226	595	94	25	80	65	241	23	13	172	50	12	74	54	73	28	1628	181	301	109	0	61	330	306	470	181	369	146
sW3NLT1S1	1	1	0	3	Soils	2	1034	0	153	22	162	139	178	23	555	44	50	240	0	375	133	140	700	88	29	53	78	317	12	12	176	48	17	59	54	80	28	1767	185	282	103	158	98	445	391	0	207	437	272
sW3NLT1S2	1	1	0	3	Soils	2	1033	0	0	17	143	91	166	24	605	41	0	249	0	466	148	189	583	94	17	46	110	364	21	14	147	38	12	82	62	82	23	1771	181	287	99	0	96	319	316	572	159	392	177
sW3NLT2L1	1	1	0	3	Leaves	4	0	22	0	38	0	19	13	33	0	20	0	0	13	0	0	632	0	0	0	0	0	20	17	0	737	0	11	33	44	19	0	0	0	0	0	0	0	0	0	0	0	0	0
sW3NLT2L2	1	1	0	3	Leaves	4	0	11	0	32	0	29	12	29	0	25	0	0	20	0	0	357	0	0	0	0	0	0	0	0	332	0	0	29	57	24	18	13	0	0	0	0	0	0	0	0	0	0	0
sW3NLT2R1	1	1	0	3	Roots	4	928	34	131	32	123	100	129	40	283	60	0	166	0	272	125	184	393	92	25	29	101	289	26	17	182	49	17	82	65	54	35	1210	188	226	70	0	80	372	287	0	178	273	196
sW3NLT2R2	1	1	0	3	Roots	4	1024	44	0	31	112	90	142	23	344	34	0	184	0	259	126	186	470	63	28	34	64	266	20	0	156	45	0	67	68	67	29	1374	201	262	89	0	94	392	314	0	192	347	202
sW3NLT2S1	1	1	0	3	Soils	4	1191	37	0	26	108	159	196	46	416	44	0	198	0	396	116	132	430	126	26	36	129	501	19	11	130	51	0	127	67	176	35	1440	151	229	103	51	47	330	288	419	130	385	138
sW3NLT2S2	1	1	0	3	Soils	4	0	15	0	11	0	17	0	0	0	0	0	0	0	0	0	181	0	0	0	0	0	0	0	0	226	0	0	16	29	18	0	0	0	0	0	0	0	0	0	0	0	0	0
sW3NLT3L1	1	1	0	3	Leaves	16	0	17	0	31	0	14	0	14	23	28	0	0	13	0	0	505	0	0	0	55	0	15	10	0	492	0	0	34	31	18	0	27	0	0	0	0	0	0	0	0	0	0	0
sW3NLT3L2	1	1	0	3	Leaves	16	0	48	0	51	0	36	25	30	10	39	0	0	18	0	0	657	28	36	0	20	0	22	12	0	736	0	0	37	54	27	16	30	0	0	0	0	0	0	0	0	0	0	0
sW3NLT3R1	1	1	0	3	Roots	16	864	38	120	29	131	122	136	29	279	49	0	175	0	300	107	161	383	1236	20	48	97	264	23	22	183	59	0	80	62	74	40	1314	226	223	104	0	84	341	285	0	234	320	187
sW3NLT3R2	1	1	0	3	Roots	16	911	32	0	20	157	152	169	35	419	69	61	179	0	356	117	197	518	140	32	55	80	336	18	19	169	57	13	74	68	84	30	1557	213	301	100	0	76	250	340	551	199	366	168
sW3NLT3S1	1	1	0	3	Soils	16	1430	0	0	19	118	86	165	40	417	50	0	249	0	512	125	150	560	101	19	41	71	410	18	13	131	37	18	96	91	77	24	1465	206	208	81	139	98	324	307	0	177	353	165
sW3NLT3S2	1	1	0	3	Soils	16	1020	25	0	26	103	95	164	56	407	45	0	206	0	356	95	121	493	86	11	49	90	487	21	13	92	32	31	126	86	190	35	1120	145	159	105	0	94	417	258	0	182	299	152
sW5GLCL1	1	0	1	5	Leaves	0	0	46	0	39	23	91	138	41	0	20	0	0	25	0	10	985	0	430	193	820	0	26	15	0	1038	0	11	47	56	27	10	0	0	0	0	0	0	0	0	0	0	0	0
sW5GLCL2	1	0	1	5	Leaves	0	0	51	0	48	17	61	43	32	12	17	0	0	28	0	0	281	0	215	79	370	0	26	13	0	531	0	0	46	50	34	11	0	0	0	0	0	0	0	0	0	0	0	0
sW5GLCR1	1	0	1	5	Roots	0	850	43	0	31	84	145	116	40	299	50	0	156	15	274	103	156	327	73	18	90	58	214	17	15	183	27	0	80	68	53	19	1240	165	221	71	0	78	234	270	418	99	295	120
sW5GLCR2	1	0	1	5	Roots	0	959	42	0	35	67	104	100	45	308	50	0	88	0	341	136	123	315	122	42	146	55	244	15	14	195	0	14	36	61	37	25	933	193	179	123	0	71	318	284	0	123	286	157
sW5GLCS1	1	0	1	5	Soils	0	1080	33	0	27	51	117	94	29	337	37	0	162	0	449	126	130	427	50	33	78	132	363	0	12	142	0	0	51	22	51	10	1578	261	252	120	131	66	432	349	0	177	477	179
sW5GLCS2	1	0	1	5	Soils	0	1452	22	0	0	86	108	110	36	424	42	0	158	0	448	169	117	485	72	39	113	85	370	22	32	137	32	15	70	28	105	19	1418	250	239	129	0	57	223	335	557	140	395	106
sW5GLT1L1	1	1	1	5	Leaves	0.25	0	29	0	29	0	49	27	31	11	22	0	0	19	0	0	917	0	100	35	156	0	21	13	0	1033	0	0	27	45	20	14	32	0	0	0	0	0	0	0	0	0	0	0
sW5GLT1L2	1	1	1	5	Leaves	0.25	0	70	0	97	28	105	112	59	20	24	0	0	37	0	14	1058	0	160	60	220	0	52	34	11	1094	20	12	56	93	61	25	12	0	0	0	0	0	47	0	0	0	0	0
sW5GLT1R1	1	1	1	5	Roots	0.25	1466	37	0	26	107	155	155	74	394	64	0	184	0	236	137	182	525	89	42	147	122	282	24	17	191	73	10	72	38	106	22	1433	207	231	120	0	163	414	332	0	152	362	209
sW5GLT1R2	1	1	1	5	Roots	0.25	968	35	0	29	95	93	125	55	295	31	0	127	0	235	112	151	365	104	40	116	99	247	14	16	150	0	11	61	31	60	25	1197	214	194	86	0	91	334	228	0	152	255	167
sW5GLT1S1	1	1	1	5	Soils	0.25	1496	32	0	39	68	117	136	37	403	47	28	145	0	358	104	175	631	52	15	61	74	267	17	0	190	45	0	101	34	50	10	1410	162	218	94	0	157	350	307	0	171	321	271
sW5GLT1S2	1	1	1	5	Soils	0.25	1173	20	0	16	77	89	147	47	379	37	0	157	0	283	118	152	562	907	44	72	65	299	13	0	132	30	10	56	26	43	0	1321	160	205	94	0	64	254	297	472	118	375	140
sW5GLT2L1	1	1	1	5	Leaves	4	0	68	0	90	25	65	52	72	23	34	0	0	34	0	16	1111	0	29	13	72	0	45	22	11	1022	19	11	58	86	47	26	14	0	0	0	0	0	38	0	0	0	0	0
sW5GLT2L2	1	1	1	5	Leaves	4	0	25	0	29	0	32	33	21	0	36	0	0	15	0	0	701	0	450	21	116	0	26	0	0	923	0	0	28	37	17	11	0	0	0	0	0	0	0	0	0	0	0	0
sW5GLT2R1	1	1	1	5	Roots	4	939	36	0	40	76	112	129	63	327	48	0	127	0	324	70	160	386	82	47	141	64	295	22	14	198	55	0	51	34	60	14	1182	107	176	94	0	45	255	258	405	101	285	106
sW5GLT2R2	1	1	1	5	Roots	4	645	36	0	38	58	86	91	45	227	23	0	109	0	256	43	121	308	78	15	81	64	189	20	13	150	18	12	45	43	51	16	809	151	117	61	0	64	224	188	0	114	243	146
sW5GLT2S1	1	1	1	5	Soils	4	1005	27	0	20	95	133	160	43	336	45	0	172	0	522	141	147	462	54	31	54	75	379	21	17	122	33	12	60	32	105	21	1489	204	201	124	43	63	469	302	527	133	378	118
sW5GLT2S2	1	1	1	5	Soils	4	1123	23	0	18	85	84	159	36	349	34	0	163	0	624	126	120	486	69	23	40	103	272	15	12	144	19	0	64	32	50	15	1391	199	195	104	0	48	307	306	508	155	381	134
sW5GLT3L1	1	1	1	5	Leaves	64	0	31	0	24	20	92	100	23	0	19	0	0	22	0	0	327	0	362	99	463	0	17	0	0	462	0	0	35	47	15	10	0	0	0	0	0	0	0	0	0	0	0	0
sW5GLT3L2	1	1	1	5	Leaves	64	0	0	0	20	0	28	40	20	0	20	0	0	0	0	0	319	0	141	45	278	0	10	0	0	398	0	0	40	37	16	0	0	0	0	0	0	0	0	0	0	0	0	0
sW5GLT3R1	1	1	1	5	Roots	64	742	37	0	36	47	99	107	57	245	21	0	100	0	215	58	118	282	159	29	219	60	195	13	10	159	19	0	57	60	35	12	906	115	155	55	0	91	226	147	0	106	204	135
sW5GLT3R2	1	1	1	5	Roots	64	2044	34	0	25	60	161	114	38	355	32	0	143	0	257	80	120	465	111	27	98	66	190	17	17	152	0	18	46	36	126	13	1027	163	173	66	0	110	247	209	0	104	315	176
sW5GLT3S1	1	1	1	5	Soils	64	935	14	0	37	66	117	144	73	389	30	55	172	0	427	137	166	649	1010	61	202	144	330	16	10	174	33	0	67	43	48	18	1288	179	146	86	0	84	338	245	0	186	321	251
sW5GLT3S2	1	1	1	5	Soils	64	1301	21	0	18	57	142	144	50	458	32	0	198	0	305	107	151	622	175	35	184	41	328	12	11	159	58	42	95	31	118	15	1232	204	269	108	0	127	392	278	0	176	374	167
sW5NLCL1	1	0	0	5	Leaves	0	0	20	0	13	13	54	55	0	0	30	0	0	19	0	0	78	0	210	69	362	0	14	0	0	298	0	0	22	28	0	0	0	0	0	0	0	0	0	0	0	0	0	0
sW5NLCL2	1	0	0	5	Leaves	0	0	37	0	31	33	98	178	25	14	28	0	0	23	0	0	396	0	561	187	1324	0	23	13	0	691	0	0	43	50	20	11	40	0	0	0	0	0	0	0	0	0	0	0
sW5NLCR1	1	0	0	5	Roots	0	339	0	0	11	66	64	88	15	261	29	0	147	0	227	70	109	293	90	21	88	0	108	12	15	113	0	0	38	36	24	0	1067	152	201	77	0	82	329	213	0	140	262	144
sW5NLCR2	1	0	0	5	Roots	0	472	0	0	23	52	57	93	16	188	32	0	113	0	255	60	75	267	52	21	61	0	90	14	12	104	0	0	31	26	20	0	891	129	141	55	147	74	176	200	0	128	240	117
sW5NLCS1	1	0	0	5	Soils	0	1126	0	0	0	114	118	177	20	440	22	0	221	0	379	112	161	714	100	27	114	71	301	13	12	137	38	10	61	57	55	15	1851	188	337	116	0	75	332	348	629	187	391	178
sW5NLCS2	1	0	0	5	Soils	0	759	24	0	27	168	214	184	59	460	68	0	242	0	389	132	217	676	128	45	100	105	403	35	22	190	71	22	83	68	68	33	1750	197	346	127	97	90	397	361	436	155	416	242
sW5NLT1L1	1	1	0	5	Leaves	0.25	0	63	0	84	27	193	159	53	0	24	0	0	25	0	0	163	0	1325	154	808	0	40	27	0	436	0	0	60	88	49	26	0	0	0	0	0	0	0	0	0	0	0	0
sW5NLT1L2	1	1	0	5	Leaves	0.25	0	60	0	54	43	146	176	31	12	27	0	0	15	0	0	444	0	574	177	813	0	30	22	12	753	0	0	38	65	48	17	45	0	0	0	0	0	0	0	0	0	0	0
sW5NLT1R1	1	1	0	5	Roots	0.25	580	0	0	12	115	142	152	12	321	34	0	200	0	261	100	151	403	62	18	38	34	139	26	0	105	28	0	45	24	40	12	1248	163	258	70	0	99	391	284	0	196	295	170
sW5NLT1R2	1	1	0	5	Roots	0.25	455	22	0	16	53	79	95	14	190	26	0	169	0	209	79	102	242	49	34	16	0	134	0	16	123	0	0	34	44	25	10	816	133	166	65	0	47	217	167	0	127	186	120
sW5NLT1S1	1	1	0	5	Soils	0.25	1146	21	0	17	159	139	164	23	501	44	82	250	0	371	127	195	723	178	50	103	77	314	23	19	174	77	14	67	59	64	19	2022	257	333	105	201	103	534	426	0	197	499	221
sW5NLT1S2	1	1	0	5	Soils	0.25	953	30	194	17	186	156	195	17	493	52	0	243	0	361	196	207	644	186	29	129	87	386	36	15	160	57	13	80	56	74	20	2131	229	319	124	61	102	411	430	567	205	458	184
sW5NLT2L1	1	1	0	5	Leaves	4	0	66	0	87	26	119	70	48	16	22	0	0	27	0	14	1745	0	670	91	451	0	40	25	10	1379	0	12	43	77	34	29	0	0	0	0	0	0	0	0	0	0	0	0
sW5NLT2L2	1	1	0	5	Leaves	4	0	48	0	59	20	75	53	47	16	24	0	0	27	0	10	686	0	188	50	271	0	32	12	0	868	0	10	50	65	32	18	0	0	0	0	0	0	0	0	0	0	0	0
sW5NLT2R1	1	1	0	5	Roots	4	846	25	0	18	70	61	78	19	216	18	0	143	0	207	82	98	336	73	33	101	42	174	0	0	97	0	11	39	32	40	0	1099	131	200	65	0	69	315	207	0	160	244	162
sW5NLT2R2	1	1	0	5	Roots	4	1170	26	0	25	103	98	132	19	477	69	0	197	0	278	142	110	472	247	48	127	60	362	23	0	112	22	0	99	51	71	15	1402	187	241	76	0	46	291	292	478	116	366	122
sW5NLT2S1	1	1	0	5	Soils	4	1621	20	0	22	150	162	207	49	325	55	0	292	0	410	149	144	516	128	30	142	73	439	32	17	123	62	23	127	62	154	38	1407	167	245	108	0	111	496	322	0	266	350	248
sW5NLT2S2	1	1	0	5	Soils	4	1795	37	0	36	148	140	181	45	431	42	0	268	15	426	127	151	532	86	25	77	81	424	33	11	136	54	20	87	75	61	25	1553	177	256	101	72	43	336	326	363	150	381	188
sW5NLT3L1	1	1	0	5	Leaves	64	0	76	0	101	37	220	249	81	16	38	0	0	37	0	12	605	0	864	357	1694	0	58	29	18	852	0	23	93	95	70	28	15	0	0	0	0	0	42	0	0	0	0	0
sW5NLT3L2	1	1	0	5	Leaves	64	0	101	0	119	42	137	154	71	18	34	0	0	33	0	19	632	0	579	348	2475	0	60	26	12	795	0	15	66	87	59	24	0	0	0	0	0	0	0	0	0	0	0	0
sW5NLT3R1	1	1	0	5	Roots	64	489	40	161	28	98	112	114	28	202	49	0	174	0	222	94	144	319	55	28	30	50	200	23	14	131	23	0	57	59	45	23	998	125	176	73	0	58	239	250	348	99	234	107
sW5NLT3R2	1	1	0	5	Roots	64	550	0	0	16	68	64	88	0	198	32	0	178	0	245	104	99	314	57	0	28	43	138	14	0	96	28	0	54	44	27	10	1045	104	153	49	0	31	208	234	347	73	231	81
sW5NLT3S1	1	1	0	5	Soils	64	895	34	0	19	105	134	165	27	427	55	0	274	14	369	115	135	527	137	24	110	94	361	20	17	116	49	22	83	87	62	32	1411	128	222	110	0	82	368	349	438	117	380	103
sW5NLT3S2	1	1	0	5	Soils	64	1129	22	0	15	93	97	154	19	403	48	0	204	0	510	119	115	564	131	44	217	90	334	17	0	100	38	26	45	45	40	14	1503	141	267	83	49	69	344	282	505	109	360	92
W1GLCL1	0	0	1	1	Leaves	0	0	0	0	20	0	11	0	18	0	20	0	0	0	0	0	431	0	0	0	0	0	16	0	0	422	0	0	24	28	11	0	0	0	0	0	0	0	0	0	0	0	0	0
W1GLCL2	0	0	1	1	Leaves	0	0	12	0	19	0	27	0	14	0	24	0	0	14	0	0	308	0	0	0	15	0	13	0	0	325	0	0	29	41	0	11	0	0	0	0	0	0	0	0	0	0	0	0
W1GLCR1	0	0	1	1	Roots	0	559	0	0	22	143	128	138	22	327	43	0	118	0	222	96	151	402	88	19	47	33	268	11	17	126	36	15	69	49	35	16	1277	171	275	100	0	83	304	285	0	213	302	195
W1GLCR2	0	0	1	1	Roots	0	714	21	182	31	117	140	134	47	307	48	0	158	0	280	96	177	378	82	35	68	43	242	21	11	140	40	0	70	70	70	21	1481	197	265	100	0	120	420	305	0	201	358	245
W1GLCS1	0	0	1	1	Soils	0	706	19	0	31	96	161	138	71	299	42	0	160	0	225	112	152	451	89	20	69	69	462	12	0	179	27	13	63	54	128	26	1463	278	239	123	164	123	366	319	0	174	347	177
W1GLCS2	0	0	1	1	Soils	0	653	22	0	23	51	109	63	19	90	15	0	29	0	98	76	57	410	70	25	31	19	361	12	0	82	0	16	66	34	26	23	412	68	59	80	0	29	167	104	0	122	162	48
W1GLT1L1	0	1	1	1	Leaves	4	0	53	0	47	12	51	25	37	14	24	0	0	21	0	0	1198	0	37	0	0	0	31	22	0	1110	0	0	51	79	23	17	0	0	0	0	0	0	0	0	0	0	0	0
W1GLT1L2	0	1	1	1	Leaves	4	0	40	0	52	0	30	25	37	0	17	0	0	23	0	0	1495	0	22	0	60	0	29	18	0	1158	0	0	47	58	34	0	0	0	0	0	0	0	0	0	0	0	0	0
W1GLT1R1	0	1	1	1	Roots	4	695	24	0	42	129	143	149	47	364	43	0	190	0	253	97	152	365	126	35	85	45	339	23	16	154	45	14	69	55	55	25	1459	218	249	104	0	90	373	301	0	199	355	235
W1GLT1R2	0	1	1	1	Roots	4	733	18	0	15	97	132	117	42	302	37	0	140	0	284	92	110	483	73	20	0	0	278	0	19	94	26	0	50	42	29	17	1272	169	206	127	0	75	418	288	0	189	360	198
W1GLT1S1	0	1	1	1	Soils	4	882	19	0	35	100	203	128	82	207	29	0	98	0	250	106	109	413	144	38	20	20	498	17	0	116	38	34	114	34	39	41	943	171	153	83	0	71	252	244	0	148	271	118
W1GLT1S2	0	1	1	1	Soils	4	1139	30	0	17	72	166	96	34	199	20	0	114	0	190	125	82	517	95	16	29	23	321	0	0	80	49	16	65	47	32	23	1030	162	143	71	0	60	334	254	0	154	293	132
W1GLT2L1	0	1	1	1	Leaves	4	0	24	0	27	0	17	11	24	0	22	0	0	0	0	0	1372	0	11	0	20	0	18	12	0	1034	0	0	33	35	14	0	0	0	0	0	0	0	0	0	0	0	0	0
W1GLT2L2	0	1	1	1	Leaves	4	0	17	0	28	0	13	0	25	0	21	0	0	17	0	0	535	0	0	0	0	0	19	0	0	486	0	0	31	26	17	0	0	0	0	0	0	0	0	0	0	0	0	0
W1GLT2R1	0	1	1	1	Roots	4	706	0	0	11	114	93	96	34	288	36	0	128	0	309	96	128	441	60	26	20	47	245	0	0	124	28	0	43	28	32	14	1370	181	235	105	0	104	373	275	0	236	314	179
W1GLT2R2	0	1	1	1	Roots	4	480	25	0	20	86	72	109	27	231	37	0	129	0	219	77	124	321	57	19	36	40	219	14	0	134	24	11	53	44	59	21	1107	191	223	86	0	68	297	236	0	178	238	143
W1GLT2S1	0	1	1	1	Soils	4	498	46	0	20	56	166	82	66	175	30	0	112	0	380	83	93	454	152	31	19	15	368	20	0	90	25	0	117	65	70	0	706	102	141	86	0	53	239	190	0	166	163	80
W1GLT2S2	0	1	1	1	Soils	4	725	24	0	22	78	100	89	47	239	15	0	137	0	246	75	112	557	740	20	28	29	356	12	0	107	31	18	69	43	31	28	942	161	155	107	0	74	294	232	0	170	273	124
W1GLT3L1	0	1	1	1	Leaves	4	0	40	0	51	0	46	20	41	12	22	0	0	31	0	0	1904	0	0	0	12	0	25	13	0	1507	0	0	43	60	41	14	0	0	0	0	0	0	0	0	0	0	0	0
W1GLT3L2	0	1	1	1	Leaves	4	0	56	0	50	0	41	17	28	12	20	0	0	15	0	0	1078	0	0	0	16	0	37	19	0	995	0	0	56	51	39	18	33	0	0	0	0	0	0	0	0	0	0	0
W1GLT3R1	0	1	1	1	Roots	4	731	32	0	30	123	131	102	38	333	37	0	170	0	311	117	131	420	98	30	39	42	330	25	16	130	36	19	81	68	43	26	1326	251	242	111	0	119	411	298	0	255	319	194
W1GLT3R2	0	1	1	1	Roots	4	644	0	0	21	95	103	93	54	252	33	0	137	0	328	108	99	443	46	21	39	30	321	15	12	101	32	0	68	45	116	19	1485	211	235	109	0	82	418	342	0	283	339	169
W1GLT3S1	0	1	1	1	Soils	4	702	27	0	28	62	84	109	70	168	25	0	79	0	250	61	115	447	48	21	33	20	420	14	0	86	24	16	58	52	27	20	507	106	90	76	0	71	234	162	0	52	186	69
W1GLT3S2	0	1	1	1	Soils	4	626	24	0	20	45	108	73	45	139	0	0	102	0	287	55	65	384	87	22	0	27	408	11	0	70	18	10	74	33	18	16	598	125	66	46	0	58	149	123	0	158	154	61
W1NLCL1	0	0	0	1	Leaves	0	0	12	0	22	0	11	0	19	0	17	0	0	14	0	0	754	0	0	0	0	0	10	0	0	521	0	0	29	31	11	0	0	0	0	0	0	0	0	0	0	0	0	0
W1NLCL2	0	0	0	1	Leaves	0	0	30	0	47	0	38	20	31	0	23	0	0	16	0	0	1030	0	15	0	0	0	22	12	0	918	0	0	32	42	22	0	0	0	0	0	0	0	0	0	0	0	0	0
W1NLCR1	0	0	0	1	Roots	0	440	21	0	29	128	60	80	28	182	42	0	130	0	169	66	98	276	68	0	28	30	174	16	0	159	29	10	72	44	35	39	677	87	178	71	0	61	185	143	0	103	177	137
W1NLCR2	0	0	0	1	Roots	0	564	37	0	33	122	86	139	26	303	50	0	155	0	223	99	144	349	110	40	91	46	264	20	0	148	43	16	74	74	51	26	1043	135	248	70	0	123	280	245	0	204	253	141
W1NLCS1	0	0	0	1	Soils	0	797	0	188	16	148	188	190	28	689	59	74	289	0	363	105	140	682	286	18	89	52	410	16	19	212	56	18	94	76	64	29	1730	262	338	117	0	134	506	336	0	214	413	280
W1NLCS2	0	0	0	1	Soils	0	853	20	120	18	167	153	188	15	531	74	52	244	0	282	108	158	613	137	18	95	42	465	0	0	169	55	10	97	58	62	24	1790	171	316	119	77	71	274	323	476	182	402	152
W1NLT1L1	0	1	0	1	Leaves	4	0	32	0	43	15	32	14	25	0	19	0	0	0	0	0	1516	0	0	0	0	0	18	10	0	1246	0	0	43	37	37	19	0	0	0	0	0	0	0	0	0	0	0	0
W1NLT1L2	0	1	0	1	Leaves	4	0	24	0	35	0	29	20	23	0	14	0	0	0	0	0	1511	0	0	0	14	0	13	11	0	1176	0	0	34	43	17	0	0	0	0	0	0	0	0	0	0	0	0	0
W1NLT1R1	0	1	0	1	Roots	4	538	23	131	14	90	104	490	36	244	62	0	141	0	163	92	122	304	104	36	51	28	222	26	24	133	50	0	67	35	57	37	970	144	179	68	0	74	238	213	0	167	202	152
W1NLT1R2	0	1	0	1	Roots	4	947	19	210	13	148	126	98	24	303	64	0	161	0	216	96	132	385	74	25	34	41	235	16	12	115	29	0	88	49	41	14	1142	126	242	81	125	83	252	227	0	202	275	131
W1NLT1S1	0	1	0	1	Soils	4	572	15	158	24	147	154	199	31	522	36	57	220	0	346	108	136	542	121	26	76	35	501	17	15	182	45	10	83	50	83	28	1639	225	278	77	152	95	408	267	0	217	340	238
W1NLT1S2	0	1	0	1	Soils	4	744	21	142	18	155	138	172	25	553	64	56	297	0	322	106	146	552	159	21	53	58	409	18	14	155	48	0	85	56	85	21	1689	212	282	130	59	66	331	323	552	143	416	156
W1NLT2L1	0	1	0	1	Leaves	4	0	27	0	66	0	27	16	37	0	26	0	0	23	0	0	1567	0	0	0	0	0	29	20	0	1367	0	0	46	80	26	20	0	0	0	0	0	0	0	0	0	0	0	0
W1NLT2L2	0	1	0	1	Leaves	4	0	39	0	49	0	36	20	33	10	17	0	0	23	0	0	1714	0	0	0	0	0	22	16	0	1453	0	0	47	60	25	16	0	0	0	0	0	0	0	0	0	0	0	0
W1NLT2R1	0	1	0	1	Roots	4	1142	0	168	0	128	109	118	13	416	41	57	216	0	329	98	158	504	61	14	37	41	241	0	10	123	32	0	74	25	53	13	1517	190	326	90	0	115	387	301	0	280	325	162
W1NLT2R2	0	1	0	1	Roots	4	1041	0	0	0	124	131	105	19	316	56	0	172	0	212	96	136	367	82	32	51	34	211	12	10	125	0	0	87	36	27	16	1180	156	211	68	115	58	265	246	0	284	261	106
W1NLT2S1	0	1	0	1	Soils	4	866	0	0	21	161	182	154	34	451	43	0	225	0	302	92	138	509	130	22	45	50	481	12	11	157	42	0	69	55	67	36	1504	196	265	90	0	85	512	287	0	165	318	220
W1NLT2S2	0	1	0	1	Soils	4	727	23	0	10	110	112	155	39	505	36	66	239	0	280	79	132	481	80	20	50	40	561	0	19	149	35	0	61	54	68	27	1521	161	253	110	134	65	298	307	0	193	343	188
W1NLT3L1	0	1	0	1	Leaves	4	0	22	0	35	0	17	12	14	0	15	0	0	14	0	0	924	173	0	0	0	0	18	12	0	737	0	0	30	34	18	0	0	0	0	0	0	0	0	0	0	0	0	0
W1NLT3L2	0	1	0	1	Leaves	4	0	42	0	57	12	28	21	30	16	25	0	0	17	0	0	1783	0	12	0	0	0	31	0	0	1416	0	0	42	41	36	17	0	0	0	0	0	0	24	0	0	0	0	0
W1NLT3R1	0	1	0	1	Roots	4	925	23	0	19	146	117	108	21	285	60	0	160	0	185	90	134	344	76	23	31	0	207	14	15	138	28	0	66	39	32	14	1029	169	188	74	0	66	291	200	0	185	210	125
W1NLT3R2	0	1	0	1	Roots	4	960	0	0	11	112	117	97	15	315	34	0	175	0	223	82	112	435	77	38	19	43	244	0	11	120	31	10	61	31	43	17	1025	116	225	67	149	41	218	219	0	203	253	143
W1NLT3S1	0	1	0	1	Soils	4	1143	0	0	36	155	142	209	41	698	57	76	260	0	412	122	162	679	102	30	62	90	452	26	0	186	54	14	71	76	70	40	1810	214	268	124	0	77	275	339	485	171	402	214
W1NLT3S2	0	1	0	1	Soils	4	729	17	0	28	170	158	187	30	604	47	68	285	0	330	104	166	534	115	39	59	29	488	13	18	174	57	12	77	52	81	25	1856	148	306	104	63	52	329	370	495	171	358	186
W3GLCL1	0	0	1	3	Leaves	0	0	39	0	55	12	40	18	32	20	34	0	0	22	0	0	889	0	0	0	0	0	29	14	0	941	0	0	45	49	21	14	0	0	0	0	0	0	0	0	0	0	0	0
W3GLCL2	0	0	1	3	Leaves	0	0	41	0	64	10	44	22	34	11	14	0	0	22	0	0	732	0	171	0	124	0	24	11	10	753	0	10	48	51	27	11	0	0	0	0	0	0	0	0	0	0	0	0
W3GLCR1	0	0	1	3	Roots	0	843	42	0	39	113	138	126	29	335	35	0	145	14	248	126	202	384	102	22	42	68	216	18	12	180	28	14	61	66	68	23	1224	145	227	80	139	104	311	295	0	134	303	175
W3GLCR2	0	0	1	3	Roots	0	835	58	0	29	89	104	106	60	331	46	0	158	12	256	95	160	377	41	22	35	38	211	0	0	138	34	10	62	69	53	32	1225	200	237	58	0	105	318	273	0	161	300	161
W3GLCS1	0	0	1	3	Soils	0	941	26	0	18	92	94	82	38	264	45	0	95	0	397	95	115	388	57	42	42	109	349	0	23	100	35	0	52	36	62	23	1092	187	235	92	0	74	347	236	0	178	351	174
W3GLCS2	0	0	1	3	Soils	0	1149	17	0	24	69	151	98	51	335	54	0	107	0	371	113	143	547	62	28	74	60	376	0	16	165	0	12	88	37	115	12	1284	225	196	101	0	100	371	306	0	144	331	151
W3GLT1L1	0	1	1	3	Leaves	2	0	24	0	22	0	40	0	22	18	18	0	0	11	0	0	173	0	0	0	0	0	11	11	0	280	0	0	38	35	13	0	0	0	0	0	0	0	0	0	0	0	0	0
W3GLT1L2	0	1	1	3	Leaves	2	0	33	0	41	0	25	13	24	12	28	0	0	28	0	0	664	0	0	0	0	0	30	15	0	605	0	0	26	38	31	10	0	0	0	0	0	0	0	0	0	0	0	0
W3GLT1R1	0	1	1	3	Roots	2	619	26	0	25	137	132	107	24	390	39	0	207	0	286	120	197	385	72	14	24	91	210	12	12	124	36	0	47	28	79	12	1486	157	276	101	0	61	236	320	484	144	309	148
W3GLT1R2	0	1	1	3	Roots	2	952	39	0	17	133	157	155	20	367	51	0	172	0	322	90	185	478	58	23	48	48	277	16	10	152	43	15	55	50	72	26	1489	241	323	96	0	129	401	316	0	251	371	191
W3GLT1S1	0	1	1	3	Soils	2	1103	20	0	17	77	112	135	36	381	43	0	132	0	322	95	128	543	60	17	134	59	340	0	0	106	25	0	69	22	34	13	1292	230	209	118	0	91	358	289	0	135	330	209
W3GLT1S2	0	1	1	3	Soils	2	725	31	0	13	35	128	89	46	239	30	0	122	0	256	80	118	625	55	29	25	33	466	14	0	126	30	13	99	50	139	17	825	142	71	77	0	93	267	184	0	99	212	107
W3GLT2L1	0	1	1	3	Leaves	4	0	42	0	58	0	28	21	27	0	24	0	0	23	0	0	1038	0	0	0	0	0	38	17	0	927	0	0	53	52	25	15	0	0	0	0	0	0	23	0	0	0	0	0
W3GLT2L2	0	1	1	3	Leaves	4	0	38	0	52	0	36	17	43	13	23	0	0	19	0	0	730	0	0	0	12	0	28	15	0	769	0	0	46	57	28	0	0	0	0	0	0	0	0	0	0	0	0	0
W3GLT2R1	0	1	1	3	Roots	4	787	31	0	19	113	111	132	43	292	35	0	172	0	260	111	199	424	67	20	39	53	234	13	0	161	35	13	54	44	144	18	1386	203	247	94	0	62	309	280	445	119	323	126
W3GLT2R2	0	1	1	3	Roots	4	578	24	0	24	97	99	77	32	279	38	0	147	0	254	116	167	385	1093	20	46	46	218	14	0	163	23	0	61	51	52	15	1183	225	236	68	0	62	254	274	0	198	293	163
W3GLT2S1	0	1	1	3	Soils	4	766	29	0	24	61	90	114	48	347	40	0	115	0	365	86	139	639	36	24	45	23	397	14	21	164	0	0	66	32	109	10	1200	178	179	108	0	91	264	228	542	112	293	108
W3GLT2S2	0	1	1	3	Soils	4	952	22	0	28	75	180	137	65	327	38	0	148	0	334	165	103	639	87	38	118	52	339	28	0	114	28	0	92	40	93	11	1294	197	193	100	0	88	391	323	0	192	308	159
W3GLT3L1	0	1	1	3	Leaves	16	0	21	0	28	12	60	82	30	0	31	0	0	0	0	0	443	0	105	41	679	0	11	0	0	509	0	0	29	32	15	0	0	0	0	0	0	0	0	0	0	0	0	0
W3GLT3L2	0	1	1	3	Leaves	16	0	31	0	28	33	121	138	21	0	23	0	0	13	0	0	237	0	120	32	125	0	10	10	0	296	0	0	36	39	12	0	0	0	0	0	0	0	0	0	0	0	0	0
W3GLT3R1	0	1	1	3	Roots	16	889	46	0	30	127	130	129	48	398	33	0	166	0	308	126	161	436	63	30	36	60	294	20	13	161	35	0	74	48	60	24	1487	209	288	94	136	77	366	285	0	154	393	202
W3GLT3R2	0	1	1	3	Roots	16	875	43	108	29	141	131	152	67	414	44	0	204	0	351	134	199	457	93	21	59	56	326	28	19	176	40	0	80	75	73	36	1581	205	299	99	0	89	297	321	535	144	392	140
W3GLT3S1	0	1	1	3	Soils	16	1609	26	0	20	74	108	131	75	405	52	0	116	0	316	95	143	561	66	21	31	184	496	0	12	161	0	0	78	35	32	25	1393	145	216	103	0	50	335	302	436	112	384	126
W3GLT3S2	0	1	1	3	Soils	16	1498	0	0	14	52	70	93	35	315	36	0	112	0	242	83	119	539	30	22	29	75	355	0	0	98	29	0	49	37	31	12	1130	160	143	81	0	114	332	207	0	158	293	145
W3NLCL1	0	0	0	3	Leaves	0	0	43	0	75	13	54	25	45	11	30	0	0	23	0	0	447	0	0	0	21	0	28	16	0	648	0	0	61	72	25	22	0	0	0	0	0	0	0	0	0	0	0	0
W3NLCL2	0	0	0	3	Leaves	0	0	31	0	38	0	19	0	29	0	22	0	0	20	0	0	400	0	0	0	0	0	16	13	0	558	0	0	37	55	20	0	0	0	0	0	0	0	0	0	0	0	0	0
W3NLCR1	0	0	0	3	Roots	0	485	0	111	14	105	79	99	17	319	41	0	199	0	284	100	130	432	50	17	30	33	192	0	10	111	32	0	41	30	37	15	1319	170	232	71	0	88	203	249	392	121	287	133
W3NLCR2	0	0	0	3	Roots	0	472	28	188	13	93	144	123	29	303	48	0	154	0	264	127	159	408	54	16	33	31	215	32	12	151	39	11	78	25	51	20	1238	158	273	61	0	75	199	254	419	121	245	120
W3NLCS1	0	0	0	3	Soils	0	847	0	0	0	155	150	150	22	650	36	0	242	0	394	134	169	482	94	21	123	99	303	26	16	157	46	0	53	49	66	24	1736	213	338	116	0	80	315	301	478	162	376	236
W3NLCS2	0	0	0	3	Soils	0	1069	0	135	15	109	119	137	19	453	38	0	225	0	322	108	130	518	91	20	45	53	359	16	11	142	35	11	60	36	45	26	1668	183	292	116	63	76	296	303	452	137	381	173
W3NLT1L1	0	1	0	3	Leaves	2	0	49	0	52	17	88	103	38	0	32	0	0	19	0	0	839	0	57	0	20	0	27	11	0	923	0	11	44	58	25	15	0	0	0	0	0	0	0	0	0	0	0	0
W3NLT1L2	0	1	0	3	Leaves	2	0	34	0	28	0	32	19	33	0	25	0	0	19	0	0	569	0	0	0	0	0	16	12	0	674	0	0	44	54	26	10	0	0	0	0	0	0	0	0	0	0	0	0
W3NLT1R1	0	1	0	3	Roots	2	572	40	0	29	96	84	113	28	238	31	0	185	0	192	64	130	331	68	15	32	38	188	24	13	176	31	0	60	61	43	25	1005	126	146	63	0	100	234	201	0	126	198	135
W3NLT1R2	0	1	0	3	Roots	2	515	28	0	72	148	161	144	65	432	40	0	184	0	256	91	208	438	154	21	46	72	520	30	16	167	59	18	152	73	58	17	1223	188	271	87	0	136	326	220	0	157	283	261
W3NLT1S1	0	1	0	3	Soils	2	639	0	0	14	120	85	114	13	366	55	0	198	0	282	147	119	448	100	0	47	0	241	0	0	97	35	11	43	26	48	23	1179	161	238	81	102	179	312	244	0	139	243	163
W3NLT1S2	0	1	0	3	Soils	2	812	27	0	16	174	136	131	34	550	50	0	225	0	371	124	151	551	144	28	82	63	373	25	13	149	33	18	75	53	80	29	1675	188	305	106	59	86	264	348	467	153	402	179
W3NLT2L1	0	1	0	3	Leaves	4	0	39	0	53	21	52	50	28	0	23	0	0	12	0	0	581	0	38	22	319	0	24	13	0	745	0	0	56	55	20	13	0	0	0	0	0	0	0	0	0	0	0	0
W3NLT2L2	0	1	0	3	Leaves	4	0	56	0	59	16	48	22	48	10	27	0	0	21	0	0	680	0	31	0	26	0	26	14	0	764	0	11	33	67	28	15	0	0	0	0	0	0	0	0	0	0	0	0
W3NLT2R1	0	1	0	3	Roots	4	947	25	166	18	122	142	156	29	442	66	0	196	0	313	122	205	570	56	55	44	91	234	22	15	163	51	0	65	64	52	23	1444	244	312	103	0	68	386	297	0	240	332	212
W3NLT2R2	0	1	0	3	Roots	4	1346	32	187	19	149	125	159	30	509	66	0	225	0	383	134	228	632	123	39	37	104	273	20	20	182	36	0	88	50	83	27	1581	204	334	122	0	65	306	346	562	180	380	185
W3NLT2S1	0	1	0	3	Soils	4	1218	22	204	11	151	133	175	24	541	37	0	213	0	350	135	144	620	82	40	45	66	369	0	0	116	41	0	82	73	56	30	1785	218	282	79	63	64	243	352	499	136	402	182
W3NLT2S2	0	1	0	3	Soils	4	1024	19	0	26	114	96	168	37	651	59	0	226	0	455	128	170	649	99	24	35	87	348	16	12	176	36	0	68	74	60	30	1761	277	302	114	168	84	462	351	0	218	445	275
W3NLT3L1	0	1	0	3	Leaves	16	0	33	0	47	0	38	22	30	0	23	0	0	22	0	11	661	0	14	0	0	0	20	20	0	716	0	0	45	35	28	16	0	0	0	0	0	0	0	0	0	0	0	0
W3NLT3L2	0	1	0	3	Leaves	16	0	18	0	35	0	27	14	19	0	20	0	0	28	0	0	488	0	0	0	0	0	24	0	0	631	0	0	40	52	20	16	0	0	0	0	0	0	0	0	0	0	0	0
W3NLT3R1	0	1	0	3	Roots	16	827	17	171	31	137	119	153	37	403	56	0	211	0	334	146	190	464	88	41	32	72	253	29	11	145	50	0	89	61	65	25	1475	194	272	87	0	75	425	321	0	235	299	196
W3NLT3R2	0	1	0	3	Roots	16	508	31	0	14	93	101	111	25	232	34	0	124	0	169	77	134	280	59	19	19	37	155	21	10	150	0	14	53	37	51	21	832	117	150	47	0	95	209	166	0	91	199	117
W3NLT3S1	0	1	0	3	Soils	16	853	44	0	21	111	154	216	37	429	59	0	189	0	359	107	145	569	1244	29	37	64	367	24	19	156	46	13	121	71	74	33	1664	185	272	115	0	88	341	352	432	121	341	168
W3NLT3S2	0	1	0	3	Soils	16	994	32	0	15	164	133	165	24	482	43	0	208	0	374	129	161	558	181	25	57	62	364	15	17	134	41	15	57	64	68	17	1614	169	281	93	66	71	281	337	477	112	368	135
W5GLCL1	0	0	1	5	Leaves	0	0	101	0	101	29	76	56	62	24	40	0	0	33	0	19	331	0	130	39	239	0	59	27	15	557	20	27	63	100	47	44	32	0	0	0	0	0	0	20	0	0	0	0
W5GLCL2	0	0	1	5	Leaves	0	0	100	0	113	20	103	80	82	20	29	0	0	38	0	12	1094	0	63	29	130	0	45	25	11	1043	0	19	76	88	57	30	21	0	0	0	0	0	37	0	0	0	0	0
W5GLCR1	0	0	1	5	Roots	0	596	40	0	28	51	74	56	39	167	28	0	71	0	176	66	121	193	835	19	13	47	194	18	13	150	0	14	68	40	47	22	689	137	115	41	0	0	171	170	0	78	152	118
W5GLCR2	0	0	1	5	Roots	0	803	0	0	13	75	99	79	30	252	0	0	123	0	251	62	152	342	82	33	63	98	250	20	0	125	34	0	50	37	37	0	1158	152	195	74	0	80	367	244	0	119	262	160
W5GLCS1	0	0	1	5	Soils	0	1328	16	0	25	76	107	111	34	375	52	0	188	0	522	154	148	464	39	28	18	104	297	17	0	141	36	11	52	34	39	20	1657	199	237	152	0	54	298	324	516	152	390	140
W5GLCS2	0	0	1	5	Soils	0	1381	0	0	14	84	98	140	54	447	40	0	138	0	441	160	146	513	69	25	52	96	302	24	14	153	33	10	64	40	245	22	1612	197	265	146	0	64	289	367	583	153	408	138
W5GLT1L1	0	1	1	5	Leaves	0.25	0	91	0	87	16	91	73	68	23	28	0	0	29	0	0	894	0	124	32	156	0	51	28	14	1014	0	12	50	103	43	34	0	0	0	0	0	0	0	0	0	0	0	0
W5GLT1L2	0	1	1	5	Leaves	0.25	0	90	0	82	37	94	91	58	13	28	0	0	51	0	14	985	0	100	27	103	0	50	23	0	999	0	0	60	103	57	26	0	0	0	0	0	0	31	0	0	0	0	0
W5GLT1R1	0	1	1	5	Roots	0.25	1085	0	0	20	79	72	77	27	365	33	0	170	0	396	95	158	519	89	27	96	62	222	0	0	174	0	0	59	36	61	13	1510	149	177	102	0	43	240	267	438	109	361	138
W5GLT1R2	0	1	1	5	Roots	0.25	1034	34	0	55	74	132	102	83	270	41	0	124	21	302	80	132	333	60	39	71	44	242	20	23	197	34	20	94	74	69	31	1139	237	171	90	0	72	405	254	0	89	303	179
W5GLT1S1	0	1	1	5	Soils	0.25	1192	42	0	27	99	114	130	33	403	41	0	145	0	305	86	197	502	69	19	45	66	364	0	15	154	34	0	117	58	138	21	1234	213	178	90	0	60	439	247	0	118	278	185
W5GLT1S2	0	1	1	5	Soils	0.25	1440	36	0	32	116	116	153	71	434	73	0	213	0	335	167	170	505	105	29	54	86	333	23	18	173	33	22	97	66	73	23	1465	229	253	126	0	84	316	324	416	134	363	130
W5GLT2L1	0	1	1	5	Leaves	4	0	0	0	21	0	26	12	15	0	33	0	0	0	0	0	87	0	18	12	67	0	15	0	0	250	0	0	22	25	0	0	0	0	0	0	0	0	0	0	0	0	0	0
W5GLT2L2	0	1	1	5	Leaves	4	0	39	0	28	18	84	56	48	0	19	0	0	21	0	0	1884	0	475	53	257	0	19	12	0	1638	0	0	27	35	26	0	0	0	0	0	0	0	0	0	0	0	0	0
W5GLT2R1	0	1	1	5	Roots	4	748	42	0	17	91	109	121	21	461	45	0	174	0	351	99	155	412	87	26	73	48	251	13	15	132	29	14	58	44	52	12	1429	157	245	90	0	66	225	262	556	115	318	101
W5GLT2R2	0	1	1	5	Roots	4	711	17	0	10	83	73	90	28	217	34	0	129	0	219	104	130	316	36	0	21	34	146	0	0	77	34	11	50	31	28	0	986	144	182	62	50	46	183	205	343	109	263	98
W5GLT2S1	0	1	1	5	Soils	4	886	27	0	14	81	122	111	21	443	52	0	138	0	423	137	151	544	124	15	99	121	266	12	11	115	32	0	73	36	135	11	1520	175	216	87	0	54	369	305	455	132	378	138
W5GLT2S2	0	1	1	5	Soils	4	1573	38	0	20	79	118	201	68	375	38	0	132	0	471	113	137	463	127	38	176	80	410	22	20	156	53	48	105	70	85	21	1149	182	178	121	0	121	356	300	0	185	330	209
W5GLT3L1	0	1	1	5	Leaves	64	0	18	0	31	0	25	24	21	0	17	0	0	29	0	0	551	0	49	26	79	0	0	13	0	649	0	0	22	32	17	0	0	0	0	0	0	0	0	0	0	0	0	0
W5GLT3L2	0	1	1	5	Leaves	64	0	68	0	81	19	72	69	53	15	27	0	0	19	0	10	829	0	167	43	242	0	39	18	0	853	0	13	73	64	41	24	0	0	0	0	0	0	0	0	0	0	0	0
W5GLT3R1	0	1	1	5	Roots	64	360	15	0	25	51	60	76	34	200	28	0	73	0	293	69	92	232	35	0	23	0	115	0	0	115	0	11	37	23	25	0	703	76	95	43	0	54	159	170	0	93	176	107
W5GLT3R2	0	1	1	5	Roots	64	883	24	0	25	88	84	92	26	256	34	0	113	0	267	76	108	297	100	22	81	38	142	12	13	163	21	15	60	68	35	16	820	109	134	49	0	59	239	155	0	96	202	138
W5GLT3S1	0	1	1	5	Soils	64	663	23	0	18	54	82	94	54	299	29	0	121	0	311	90	101	444	100	25	70	33	294	16	16	128	20	0	57	31	26	11	984	149	161	78	0	69	254	176	0	116	281	149
W5GLT3S2	0	1	1	5	Soils	64	1344	0	0	20	85	127	153	65	485	44	62	121	0	630	159	184	578	96	30	62	76	327	15	13	154	45	14	128	36	139	24	1563	196	201	108	0	41	253	316	521	158	340	146
W5NLCL1	0	0	0	5	Leaves	0	0	72	0	95	17	109	61	61	17	36	0	0	34	0	12	595	0	87	14	143	0	49	32	0	775	0	12	72	81	56	24	0	0	0	0	0	0	0	0	0	0	0	0
W5NLCL2	0	0	0	5	Leaves	0	0	21	0	25	0	36	44	21	0	30	0	0	0	0	0	118	0	423	69	349	0	13	0	0	287	0	0	34	27	0	0	0	0	0	0	0	0	0	0	0	0	0	0
W5NLCR1	0	0	0	5	Roots	0	419	0	150	11	94	87	111	11	325	40	0	239	0	266	108	145	367	110	59	116	34	170	0	13	124	33	0	32	31	48	12	1357	205	234	84	0	110	340	261	0	174	326	214
W5NLCR2	0	0	0	5	Roots	0	840	0	112	0	91	65	112	23	328	29	0	175	0	297	93	144	430	72	30	109	49	227	13	0	122	34	0	42	31	58	0	1579	192	282	98	101	65	237	271	391	146	359	154
W5NLCS1	0	0	0	5	Soils	0	907	0	0	0	154	96	151	19	513	49	0	258	0	355	140	188	611	114	38	92	60	254	16	20	127	58	0	69	49	72	20	1911	240	388	121	58	47	321	359	535	160	406	196
W5NLCS2	0	0	0	5	Soils	0	852	27	171	10	154	125	123	14	480	43	0	272	0	397	135	187	594	121	31	127	89	292	0	17	129	54	0	61	46	59	11	2020	239	417	155	94	75	351	388	448	176	473	182
W5NLT1L1	0	1	0	5	Leaves	0.25	0	104	0	104	28	161	143	76	24	43	0	0	31	0	13	665	0	1191	89	290	0	60	34	20	851	0	14	76	112	64	34	47	0	0	0	0	0	0	0	0	0	0	0
W5NLT1L2	0	1	0	5	Leaves	0.25	0	37	0	65	15	51	51	40	12	21	0	0	25	0	0	409	0	553	29	163	0	35	15	0	546	0	12	41	56	39	18	34	0	0	0	0	0	0	0	0	0	0	0
W5NLT1R1	0	1	0	5	Roots	0.25	792	0	133	16	122	72	109	20	469	42	0	226	0	330	118	181	517	99	29	50	45	232	18	13	154	0	0	53	31	39	11	1833	243	301	87	0	124	453	309	0	183	398	267
W5NLT1R2	0	1	0	5	Roots	0.25	545	33	181	25	106	89	146	25	242	25	0	164	0	177	93	178	376	1129	47	83	49	163	25	20	164	37	0	63	69	47	19	1005	121	194	85	59	73	194	209	305	84	241	71
W5NLT1S1	0	1	0	5	Soils	0.25	859	0	117	18	157	159	186	39	472	67	0	269	0	360	116	216	623	124	49	81	72	382	30	15	165	61	12	82	73	68	21	1893	236	374	110	225	79	465	411	0	195	425	288
W5NLT1S2	0	1	0	5	Soils	0.25	1028	0	151	10	143	141	126	14	420	32	45	271	0	366	145	171	556	91	43	55	66	312	12	16	107	48	12	61	35	50	11	1759	177	349	92	66	78	358	348	461	163	378	162
W5NLT2L1	0	1	0	5	Leaves	4	0	23	0	41	10	96	84	49	0	20	0	0	22	0	0	1817	0	240	121	634	0	11	19	0	1635	0	0	30	53	24	12	0	0	0	0	0	0	0	0	0	0	0	0
W5NLT2L2	0	1	0	5	Leaves	4	0	35	0	51	20	96	111	32	11	20	0	0	19	0	0	602	0	685	80	283	0	28	15	0	756	0	0	47	53	42	15	0	0	0	0	0	0	0	0	0	0	0	0
W5NLT2R1	0	1	0	5	Roots	4	438	40	195	35	100	123	119	33	253	37	0	180	12	199	77	155	362	76	44	67	0	139	33	0	177	24	13	65	68	66	36	945	95	202	56	0	50	224	185	0	164	245	150
W5NLT2R2	0	1	0	5	Roots	4	859	20	0	15	130	103	153	16	537	54	0	219	0	356	139	180	498	104	68	180	89	276	0	21	134	50	0	75	58	61	17	1747	207	350	123	168	87	392	374	0	218	383	232
W5NLT2S1	0	1	0	5	Soils	4	925	31	150	17	151	178	179	43	416	43	0	184	0	321	130	152	549	107	44	38	93	384	25	15	172	43	18	95	51	52	39	1461	205	279	116	62	59	305	342	411	169	328	141
W5NLT2S2	0	1	0	5	Soils	4	731	0	0	12	111	116	115	11	278	23	0	154	0	258	77	150	480	67	63	70	104	340	0	16	107	49	14	50	45	49	23	1199	188	219	77	0	64	312	245	0	216	271	230
W5NLT3L1	0	1	0	5	Leaves	64	0	85	0	91	21	82	54	58	18	43	0	0	33	0	11	628	0	144	37	212	0	50	29	0	746	0	15	61	99	55	20	0	0	0	0	0	0	34	0	0	0	0	0
W5NLT3L2	0	1	0	5	Leaves	64	0	65	0	79	17	61	47	55	0	27	0	0	25	0	0	530	0	101	46	161	0	34	19	0	674	0	15	67	72	40	25	0	0	0	0	0	0	37	0	0	0	0	0
W5NLT3R1	0	1	0	5	Roots	64	417	19	0	17	75	91	105	18	218	43	0	143	0	199	88	145	326	141	53	164	0	174	0	14	99	23	0	54	40	42	11	1042	119	195	67	0	71	286	234	0	131	232	137
W5NLT3R2	0	1	0	5	Roots	64	626	42	0	54	129	125	153	56	278	54	0	273	13	270	105	123	389	102	60	84	57	262	54	15	189	41	13	114	69	54	28	1182	146	218	92	0	118	320	296	0	218	298	172
W5NLT3S1	0	1	0	5	Soils	64	866	18	0	30	164	185	240	31	538	65	0	243	0	318	164	158	674	173	26	72	102	439	23	16	186	69	19	117	68	93	33	1516	182	262	101	56	72	275	355	510	153	370	155
W5NLT3S2	0	1	0	5	Soils	64	1029	23	121	28	155	155	183	27	494	51	0	230	0	381	147	170	643	113	57	72	54	405	0	12	215	47	22	90	50	286	23	1791	197	303	146	0	76	331	384	596	178	385	180
[truncated: 5,000 more columns]
