# Supplementary material for: Temporal Dynamics Dominates Microbiome and Resistome Assembly Despite Tetracycline Pressure in a Germfree Lettuce Model
Source: Research Square preprint supplement (doi:10.21203/rs.3.rs-8401048/v1), 2025-12-24
Supplement: Supplementary file 4 [file f73f2707ff1490bca3d37f7e.xlsx]

## Sheet: Sheet1
Samples	Salmonella	TET	Germfree	Weeks	Parts	TET_density	AAC(2')-I	AAC(2')-IE	AAC(2')-IIB	AAC(3)-I	AAC(3)-IB-AAC(6')-IB	AAC(3)-II	AAC(3)-IIIA	AAC(3)-IV	AAC(3)-IX	AAC(3)-VII	AAC(3)-VIII	AAC(3)-X	AAC(6')-31	AAC(6')-34	AAC(6')-I	AAC(6')-IAA	AAC(6')-IAK	AAC(6')-IB8	AAC(6')-II	AADA	AADE	AADK	ABCA	ABEM	ABES	ACRA	ACRB	ACRD	ACRF	ACRS	ACT	ADC-1	ADC-12	ADC-13	ADC-14	ADC-15	ADC-16	ADC-17	ADC-18	ADC-19	ADC-2	ADC-20	ADC-21
sW1GLCL1	1	0	1	1	Leaves	0	0	0	0	0	0	0	0	0	0	0	0	0	0	0	0	0	0	0	0	0	0	0	0	0	0	0	0.000247573	0	0	0	0	0	0	0	0	0	0	0.000224518	0	0	0	0	0
sW1GLCL2	1	0	1	1	Leaves	0	0	0	0	0	0	0	0	0	0	0	0	0	0	0	0	0.000675735	0	0	0	0	0	0	6.74804e-05	0	0	0	0.000470161	0.000377942	0	0	0	0	0	0	0	0	0	0	0	0	0	0	0
sW1GLCR1	1	0	1	1	Roots	0	0	0	0	0	0	0	0.000164402	0.00017574	0	0.000955584	0	0	0	0	0	0	0	0	0	0	0.000193536	0.000161507	0.000221127	0.000716688	0.00883696	0	0.041202	0.000442315	0.00146387	0.000208491	0	0	0	0	0.00011976	0.00023952	0.00035928	0.00526943	0.00011976	0.00023952	0	0	0
sW1GLCR2	1	0	1	1	Roots	0	0.000342805	0	0	0	0	0	0.000437414	0	0.00021715	0.00084749	0	0	0	0	0	0	0	0	0	0	0	0	0.000336194	0.000136204	0.00279905	0.00015293	0.0483118	0.000176526	0.00112124	0	0	0	0	0	0	0	0	0.000159319	0	0	0	0	0
sW1GLCS1	1	0	1	1	Soils	0	0	0	0	0.000339958	0.000313494	0	0	0	0	0	0	0	0	0	0	0	0	0	0	0.000199063	0	0.000645202	0.000180281	0.000467442	0.00336215	0.00032803	0.0655926	0.000858255	0.00237971	0	0	0	0	0	0	0.000136693	6.83466e-05	0.00280221	0	0.00020504	0	0	0
sW1GLCS2	1	0	1	1	Soils	0	0	0	0	0.000332953	0	0	0.00027567	0	0	0.000979204	0	0	0	0	0	0	0	0	0	0	0	0.000902724	0.000441414	0.00120175	0.0129363	0.000899556	0.0738366	0.00046973	0.00374395	0	0	0	0	0	0	0.000133877	0.000133877	0.00281141	0.00040163	0.000133877	0	6.69383e-05	6.69383e-05
sW1GLT1L1	1	1	1	1	Leaves	4	0	0	0	0	0	0	0	0	0	0	0	0	0	0	0	0.00102399	0	0	0	0	0	0	0	0	0.000681094	0.00111638	0.00199491	0.000501133	0	0.000337451	0	0	0	0	0	0	0	0	0	0	0	0	0
sW1GLT1L2	1	1	1	1	Leaves	4	0	0	0	0	0	0	0	0	0	0	0	0	0	0	0	0	0	0	0	0	0	0	0	0	0.00137265	0.000749968	0.00559993	0.00158708	0	0.000680085	0	0	0	0	0	0	0	0	0	0	0	0	0
sW1GLT1R1	1	1	1	1	Roots	4	0	0	0	0.000237212	0	0	0.000130934	0	0	0.00177579	0	0	0	0	0	0	0	0	0	0	0	0	0.000226429	0.00203854	0.0224546	0.000183111	0.0463118	0.000211363	0.00254372	0	0	0	0	0	0	9.53802e-05	0.000286141	0.00591357	0.000286141	0.000763042	0	0	9.53802e-05
sW1GLT1R2	1	1	1	1	Roots	4	0.000342739	0	0	0	0.000182657	0	0.000109333	0.000116873	0	0	0	0	0	0	0	0	0	0	0	0	0	0.000107408	0.000105041	0.00177031	0.0139926	0.000229352	0.0573776	0.000911878	0.00259607	0	8.00624e-05	0	7.96443e-05	0	0	0.000238933	0.000637155	0.00684941	0.000238933	0.000318577	0	0	0
sW1GLT1S1	1	1	1	1	Soils	4	0	0	0	0	6.63647e-05	0	7.94473e-05	8.49265e-05	0	0	0	0	0	0	0	0	0	0	0	0	0	0.00132683	0.000519034	0.00118745	0.0105745	0.000888855	0.0731982	0.000683998	0.00321554	0	0	5.78742e-05	0	0	0	0	0.000173623	0.00069449	0.000289371	0	0	0.000115748	5.78742e-05
sW1GLT1S2	1	1	1	1	Soils	4	0	0	0	0.000143483	6.61568e-05	0	0	0	0	0	0	0	0	0.000112164	0	0	0	0	0	0	0	0.00116706	0.000639151	0.000838479	0.00608157	0.000553794	0.0741989	0.000873627	0.00292766	0	0	0	0	0	0	0	0.000115386	0.00225002	0.000173079	0.000288464	0	0	0
sW1GLT2L1	1	1	1	1	Leaves	4	0	0	0	0	0	0	0	0	0	0	0	0	0	0	0	0	0	0	0	0	0	0	0	0	0	0.000950406	0.00145571	0.000548523	0	0	0	0	0	0	0	0	0	0	0	0	0	0	0
sW1GLT2L2	1	1	1	1	Leaves	4	0	0	0	0	0	0	0	0	0	0	0	0	0	0	0	0.00120902	0	0	0	0	0	0	0	0	0	0.00109842	0.0020189	0.000676211	8.47716e-05	0	0	0	0	0	0	0	0	0	0	0	0	0	0
sW1GLT2R1	1	1	1	1	Roots	4	0.00101709	0	0	0	0	0	0.000324449	0	0	0.000628619	0	0	0	0	0	0	0	0	0	0	0	0	0.000187027	0.000404112	0.00871993	0.00022687	0.0474758	0.00030552	0.00223239	0	0	0	0	0	0	0	0.000236348	0.00200896	0.000236348	0.000118174	0	0	0
sW1GLT2R2	1	1	1	1	Roots	4	0	0.000252184	0	0	0	0	0.000822535	0.000351704	0	0.00111556	0	0.000323221	0	0	0	0	0	0	0	0	0	0	0.000252878	0.000614698	0.0113691	0.000230062	0.0401272	0.000442598	0.00159798	0	0	0	0	0	0	0.00071902	0.000239673	0.00119837	0.00035951	0.00035951	0	0	0
sW1GLT2S1	1	1	1	1	Soils	4	0	0	0	0	0	0	8.46589e-05	0	0	0	0	0	0	0	0	0	0	0	0	0	9.96618e-05	0.000166337	0.000341609	0.00421783	0.0353214	0.00112475	0.0643312	0.000683313	0.00248991	0	6.19943e-05	0	6.16706e-05	6.16706e-05	6.16706e-05	0.000740047	0.000801718	0.0109774	0.00154176	0.000801718	0	0.000123341	0.000308353
sW1GLT2S2	1	1	1	1	Soils	4	0	0	0	0	0	0	0	0	0	0	0	0	0	0	0.000481675	0	0.00019204	0	0	0	0.00111578	0.00175879	0.00188192	0.000852608	0.00916509	0.000515477	0.0765573	0.00161503	0.00261428	0	0	0	0	0	0	0.000306864	0.000613727	0.00260834	0.000460295	0.000460295	0	0	7.67159e-05
sW1GLT3L1	1	1	1	1	Leaves	4	0	0	0	0	0	0	0	0	0	0	0	0	0	0	0	0.00390814	0	0	0	0	0	0	0	0	0	0.000710125	0.00416943	0.001184	0	0.000429303	0	0	0	0	0	0	0	0	0	0	0	0	0
sW1GLT3L2	1	1	1	1	Leaves	4	0	0	0	0	0	0	0	0	0	0	0	0	0	0	0	0	0	0	0	0	0	0	8.75478e-05	0	0	0	0.000243991	0.000183876	0	0	0	0	0	0	0	0	0	0.000165952	0	0	0	0	0
sW1GLT3R1	1	1	1	1	Roots	4	0	0.000246395	0	0	0	0	0.000803654	0	0	0.000155708	0	0	0	0	0.000245049	0	0	0	0	0	0	0	9.26527e-05	0.000300294	0.00987388	0.000112391	0.0351607	0.000475683	0.00134445	0	0	0	0	0	0	0.000117086	0.000117086	0.00222463	0.000351258	0.000234172	0	0	0
sW1GLT3R2	1	1	1	1	Roots	4	0.000486511	0	0	0	0	0	0	0	0	0	0	0	0	0	0	0	0	0	0	0	0.000182698	0	0.000208744	0.00106316	0.0143007	0.00032556	0.044089	0.000167018	0.0012144	0	0	0	0	0	0	0	0.00033916	0.00158275	0.000113053	0.000452214	0	0.000113053	0
sW1GLT3S1	1	1	1	1	Soils	4	0	0	0	0.000263062	0	0	0	7.76082e-05	0	7.03324e-05	0	0	0	0	0	0.000838169	0	0	0	0	0	0.00121249	0.000111602	0.0019894	0.0170966	0.00040613	0.0648106	0.00105478	0.00270338	0.000276215	0	0	5.28871e-05	0	0	0.000158661	0.000423096	0.00560603	0.000423096	0.000475984	0	0.000105774	0
sW1GLT3S2	1	1	1	1	Soils	4	0	0	0	0	6.95412e-05	0	0	0	0	8.06485e-05	0	0	0	0	0	0	0	0	0	0	0	0.00163569	0.000239946	0.00637699	0.052207	0.000407487	0.0780839	0.000627145	0.00276295	0	6.09626e-05	0	0	0	6.06443e-05	0.000242577	0.000970309	0.013645	0.0010916	0.00103095	0	0.000121289	0
sW1NLCL1	1	0	0	1	Leaves	0	0	0	0	0	0	0	0	0	0	0	0	0	0	0	0	0	0	0	0	0	0	0	0	0.00349755	0.0184825	0	0.00114571	0	0	0	0	0	0	0	0	0.000584447	0.000389631	0.00136371	0.000194816	0	0	0	0.000194816
sW1NLCL2	1	0	0	1	Leaves	0	0	0	0	0	0	0	0	0	0	0	0	0	0	0	0	0	0	0	0	0	0	0	0	0.000387704	0.00239025	0	0.00416726	8.37471e-05	0	0	0	0	0	0	0	0	0	0	0	0	0	0	0
sW1NLCR1	1	0	0	1	Roots	0	0.000642747	0	0	0	0	0	0.000615102	0	0	0.00158901	0.000199319	0	0	0	0	0	0	0	0	0.000652523	0	0	3.9397e-05	0.000638443	0.00629774	0.00014337	0.0288767	0.000110327	0.000940499	0	0	0	0	0	0	0	0	0.000597436	0	0.000149359	0	0	0
sW1NLCR2	1	0	0	1	Roots	0	0.0007084	0	0	0.0008188	0	0	0.000225977	0	0	0.00109458	0	0	0	0	0	0	0	0	0	0	0	0	0	0.000985119	0.00347051	0.000158014	0.0370299	0	0.00152436	0	0	0	0.000164615	0	0	0.000164615	0	0.00296307	0	0	0	0	0
sW1NLCS1	1	0	0	1	Soils	0	0	0	0	0	0	0	0.000903312	0	0	0.000350033	0	0	0	0	0	0	0	0	0	0	0	0	6.94281e-05	0.0063006	0.0647401	0.000126328	0.0354091	0.000194425	0.000682463	0	0	0	0	0	0	0	0.000131605	0.00486939	0.00157926	0.000131605	0	0.00026321	0
sW1NLCS2	1	0	0	1	Soils	0	0.000233153	0	0	0	0	0	0.000595	0	0	0.00100871	0	0	0	0	0	0	0	0	0	0.000157799	0	0	2.85821e-05	0.00509502	0.0167528	0	0.039231	0.000240123	0.000842868	0	0	0	0.000108358	0	0	0.000108358	0.000433433	0.0039009	0.000216717	0.000216717	0	0.000216717	0
sW1NLT1L1	1	1	0	1	Leaves	4	0	0	0	0	0	0	0	0	0	0	0	0	0	0	0	0	0	0	0	0	0	0	0.000125368	0.000406326	0	0	0.000757019	5.8513e-05	0	0	0	0	0	0	0	0	0	0	0	0	0	0	0
sW1NLT1L2	1	1	0	1	Leaves	4	0	0	0	0	0	0	0	0	0	0	0	0	0	0	0	0	0	0	0	0	0	0	0	0.000380346	0	0	0.000572344	0	8.23961e-05	0	0	0	0	0	0	0	0	0	0	0	0	0	0
sW1NLT1R1	1	1	0	1	Roots	4	0	0	0	0	0	0	0.000236232	0	0	0.0009154	0	0	0	0	0	0	0	0	0	0	0	0	4.53917e-05	0.00323659	0.02721	0.000165185	0.0339032	0.000190671	0.000701157	0	0	0	0	0	0	0	0.000172086	0.0135948	0	0.000860428	0	0.000172086	0
sW1NLT1R2	1	1	0	1	Roots	4	0.00028645	0	0	0	0	0	0.000548259	0	0	0.000531126	0	0	0	0	0.000278623	0	0	0	0	0	0	0	7.02315e-05	0.00250388	0.0219857	0	0.0382655	9.83377e-05	0.00118348	0	0	0	0.000133128	0	0	0.000133128	0.000665641	0.0123809	0	0.00106503	0	0	0
sW1NLT1S1	1	1	0	1	Soils	4	0.000289783	0	0	0	0	0	0.00147903	0	0	0.00143281	0	0.000181624	0	0	0	0	0	0	0	0	0	0	3.55243e-05	0.0034541	0.0350185	0.000387829	0.0315824	0.000198964	0.000897934	0	0	0	0	0	0	0	0.000942739	0.0137371	0.000404031	0.00121209	0.000134677	0	0
sW1NLT1S2	1	1	0	1	Soils	4	0.000251051	0	0	0.000290176	0	0	0.000480507	0	0	0.00108615	0	0	0	0	0	0	0	0	0	0	0.000188553	0	0	0.00568564	0.0684656	0	0.0407845	0.000215464	0.0012101	0	0	0.000116677	0.000233353	0	0	0.000116677	0.00116677	0.0334862	0	0.00315027	0	0.000116677	0
sW1NLT2L1	1	1	0	1	Leaves	4	0	0	0	0	0	0	0	0	0	0	0	0	0	0	0	0	0	0	0	0	0	0	0	0	0	0	0.000220827	0	0	0	0	0	0	0	0	0	0	0	0	0	0	0	0
sW1NLT2L2	1	1	0	1	Leaves	4	0	0	0	0	0	0	0	0	0	0	0	0	0	0	0	0	0	0	0	0	0	0	0	0	0	0	0.000209483	0	7.0368e-05	0	0	0	0	0	0	0	0	0	0	0	0	0	0
sW1NLT2R1	1	1	0	1	Roots	4	0	0	0	0	0	0	0	0.000228199	0	0.00144764	0.000207526	0	0	0	0	0	0	0	0	0	0	0	0	0.0034566	0.0344246	0.000597092	0.0340098	0.000172305	0.00132483	0	0	0	0.000155509	0	0	0	0.000466527	0.00979707	0	0.000933054	0	0	0
sW1NLT2R2	1	1	0	1	Roots	4	0.000313082	0.000306201	0	0	0	0	0.000599231	0	0	0.00154801	0	0	0	0	0	0	0	0	0	0	0	0	0.000153522	0.000746364	0.00409017	0.00013967	0.0487758	0.00010748	0.0013474	0	0.000146269	0	0.000145505	0	0	0	0.000727526	0.00291011	0	0.000582021	0	0.000145505	0.000291011
sW1NLT2S1	1	1	0	1	Soils	4	0.000184479	0	0	0	0	0	0.000353089	0	0	0.00068411	0	0	0	0	0	0	0	0	0	0	0.000277108	0.000231248	2.26152e-05	0.0131935	0.104838	8.22989e-05	0.0316713	0.000158328	0.000984483	0	0	0	8.5737e-05	0	0	0.000171474	0.00120032	0.0294078	0.001629	0.00342948	0	0.000600159	8.5737e-05
sW1NLT2S2	1	1	0	1	Soils	4	0.000246724	0	0	0	0	0	0	0.000168264	0.000312576	0.00152489	0	0	0	0	0	0	0	0	0	0	0.000185304	0	3.02458e-05	0.00637188	0.0624507	0.000110068	0.0326638	0.00012705	0.00106182	0	0	0	0	0	0	0.000687994	0.00217865	0.0284371	0.000229331	0.0033253	0	0.000114666	0
sW1NLT3L1	1	1	0	1	Leaves	4	0	0	0	0	0	0	0	0	0	0	0	0	0	0	0	0	0	0	0	0	0	0	0	0.00024976	0.00307961	0	0.000644295	0.0002158	0	0	0	0	0	0	0	0	0	0.000584295	0	0	0	0	0
sW1NLT3L2	1	1	0	1	Leaves	4	0	0	0	0	0	0	0	0	0	0	0	0	0	0	0	0	0	0	0	0	0	0	0	0	0	0	0.000295481	0	0	0	0	0	0	0	0	0	0	0	0	0	0	0	0
sW1NLT3R1	1	1	0	1	Roots	4	0.000360033	0	0	0	0	0	0	0	0	0.000667562	0	0	0	0	0	0	0	0	0	0.000487345	0	0	0	0.00286098	0.031161	0.000321233	0.0275533	0.000432595	0.000867701	0	0	0	0.000167326	0	0	0	0.000501979	0.0160633	0.000334652	0.00117128	0	0	0.000334652
sW1NLT3R2	1	1	0	1	Roots	4	0.00104609	0	0	0	0	0	0.000834246	0	0	0.00129308	0	0.000163912	0	0	0	0	0	0	0	0	0	0	6.41198e-05	0.00446806	0.03502	0.000350007	0.0341314	0.00017956	0.000855385	0.000211595	0	0.000121543	0	0	0	0.000121543	0.00145852	0.0217562	0.000121543	0.00279549	0	0.000243086	0
sW1NLT3S1	1	1	0	1	Soils	4	0	0	0	0	0	0	0.000572049	0	0.000378652	0.00332504	0	0	0	0	0	0	0	0	0	0	0.00044895	0	3.66395e-05	0.0046313	0.031237	0.000133335	0.0287447	0.000256512	0.000926122	0	0	0	0	0	0	0.000138905	0.00055562	0.0133349	0.00027781	0.000972334	0	0	0
sW1NLT3S2	1	1	0	1	Soils	4	0.000199845	0.000195452	0	0	0	0	0.000254999	0	0.000126592	0.00135867	0	0.000375764	0	0	0.000194384	0	0	0	0	0	0	0	0	0.0129426	0.088115	0.000267461	0.024648	0.000274425	0.00110088	0	0.000186731	0	0	0	0	0.000185756	0.00232195	0.0437456	0.000185756	0.0051083	0	0.000185756	0.000371513
sW3GLCL1	1	0	1	3	Leaves	0	0	0	0	0	0	0	0	0	0	0	0	0	0	0	0	0	0	0	0	0	0	0	0	0	0	0	0.000518466	0	0	0	0	0	0	0	0	0	0	0	0	0	0	0	0
sW3GLCL2	1	0	1	3	Leaves	0	0	0	0	0	0	0	0	0	0	0	0	0	0	0	0	0	0	0	0	0	0	0	7.00843e-05	0	0	0.000255044	0.00527367	0	0	0	0	0	0	0	0	0	0	0	0	0	0	0	0
sW3GLCR1	1	0	1	3	Roots	0	0	0	0	0	0	0	0.000786638	0	0	0.000952569	0	0.000193197	0.000298196	0	0.000299825	0	0	0	0	0.000208624	0.000231511	0	0.000113364	0	0.000503376	0.000412541	0.0410194	5.29103e-05	0.000849021	0	0	0	0	0	0	0	0	0	0	0	0	0	0
sW3GLCR2	1	0	1	3	Roots	0	0	0	0	0.000449473	0	0	0.000744289	0	0	0.00072103	0	0	0	0	0	0	0	0	0	0	0	0	9.53428e-05	0	0.000635036	0	0.0330816	6.67492e-05	0.00127191	0	0	0	0	0	0	0	0	0.000361456	0	0	0	0	0
sW3GLCS1	1	0	1	3	Soils	0	0	0.000201892	0	0.000477199	0.000550065	0	0.0014487	0.000422349	0	0.000255169	0	0	0	0	0	0	0	0	0	0.0011177	0	0.000129381	0.000430202	0	0.00202262	0.000644637	0.0693276	0.000956699	0.00230985	0	0	0	0	0	0	0	9.59382e-05	0.000671567	0	0	0	0	0
sW3GLCS2	1	0	1	3	Soils	0	0	0	0	0.000853268	0	0	0.000353235	0.000125865	0	0	0	0	0	0	0	0	0	0	0	0.00187362	0.000415833	0	0.000407242	7.33277e-05	0.00241107	0.000740996	0.0871083	0.000918682	0.0045432	0	0	0	0	0	0	0	0	0.000771951	0.000171545	8.57724e-05	0	0	0
sW3GLT1L1	1	1	1	3	Leaves	2	0	0	0	0	0	0	0	0	0	0	0	0	0	0	0	0	0	0	0	0	0	0	0.000184186	0	0	0	0	0	0	0	0	0	0	0	0	0	0	0	0	0	0	0	0
sW3GLT1L2	1	1	1	3	Leaves	2	0	0	0	0	0	0	0	0	0	0	0	0	0	0	0	0	0	0	0	0	0	0	0.000176379	0	0	0	0.00036867	0	0	0	0	0	0	0	0	0	0	0	0	0	0	0	0
sW3GLT1R1	1	1	1	3	Roots	2	0	0	0	0	0	0	0	0	0	0.000475469	0	0	0	0	0	0	0	0	0	0	0	0	0.000330078	0.000152829	0.00125629	0.00085799	0.0349566	6.60247e-05	0.00178784	0	0	0	0	0	0	0	0	0.000357533	0	0	0	0	0
sW3GLT1R2	1	1	1	3	Roots	2	0	0	0	0	0	0	0.00100427	0	0	0.000972885	0	0	0	0	0	0	0	0	0	0	0	0	0.000192969	0	0	0.000561786	0.0452285	0.000486349	0.00200524	0	0	0	0	0	0	0	0	0	0	0	0	0	0
sW3GLT1S1	1	1	1	3	Soils	2	0.000320816	0	0	0	8.54869e-05	0	0.000307018	0.000109397	0	0	0	0	0	0	0	0	0	0	0	0.000434261	0	0	0.000196643	6.37335e-05	0.00130975	0.00164589	0.0831917	0.00085355	0.00428013	0	0	0	0	0	0	0	0	7.45499e-05	0	0	0	0	0
sW3GLT1S2	1	1	1	3	Soils	2	0	0	0	0.000218121	0	0	0.000722378	0.0001287	0	0	0	0	0.000182557	0	0	0	0	0	0	0.000766325	0	0.000118277	0.000323876	0	0.000616341	0.000757682	0.0621845	0.000745018	0.00207911	0	0	0	0	0	0	0	0	0.000175408	0	0	0	0	0
sW3GLT2L1	1	1	1	3	Leaves	4	0	0	0	0	0	0	0	0	0	0	0	0	0	0	0	0	0	0	0	0	0	0	0.000401035	0	0	0.000291881	0.00178826	0	0	0	0	0	0	0	0	0	0	0	0	0	0	0	0
sW3GLT2L2	1	1	1	3	Leaves	4	0	0	0	0	0	0	0	0	0	0	0	0	0	0	0	0	0	0	0	0	0	0	0	0	0	0	9.05442e-05	0	0	0	0	0	0	0	0	0	0	0	0	0	0	0	0
sW3GLT2R1	1	1	1	3	Roots	4	0	0	0	0	0	0	0.000203894	0.000435911	0	0.000592566	0	0	0.00061833	0	0	0	0	0.000252828	0	0.000216298	0	0	3.91779e-05	0.000253957	0.00156568	0.000285145	0.0349944	0.00016457	0.00159546	0	0	0	0	0	0	0	0	0.000297057	0	0	0	0	0
sW3GLT2R2	1	1	1	3	Roots	4	0.000356665	0.000348827	0	0	0	0.00155386	0	0	0	0.000661317	0	0	0	0	0	0	0	0	0	0.00120697	0.000803626	0	0.000174894	0.000283422	0.000582444	0.000477342	0.0380797	0.000673434	0.00171917	0	0	0	0	0	0	0	0	0.000331522	0	0	0	0	0
sW3GLT2S1	1	1	1	3	Soils	4	0	0	0	0.000468177	0.000215866	0	0.000904471	0.000138121	0	0	0.000125609	0.000126935	0	0	0	0	0	0	0	0.00109657	0	0	7.44827e-05	0	0.00198438	0.0001807	0.0552507	0.000695268	0.00202213	0	0	0	0	0	0	9.41244e-05	0	0.000376498	0	0	0	0	0
sW3GLT2S2	1	1	1	3	Soils	4	0	0	0.000125048	0	0.000359419	0	0.000430273	0.000459947	0	0	0	0	0	0	0	0	0	0	0	0.000570561	0.000253262	0.00116242	0.000826764	0.00013398	0.000826005	0.000752169	0.0904954	0.000607755	0.00336686	0	7.87704e-05	0	0	0	0	0	0	7.83591e-05	0	0	0	0	0
sW3GLT3L1	1	1	1	3	Leaves	16	0	0	0	0	0	0	0	0	0	0	0	0	0	0	0	0	0	0.000536857	0	0	0	0	0	0	0	0	0.000115924	0	0.000116821	0	0	0	0	0	0	0	0	0	0	0	0	0	0
sW3GLT3L2	1	1	1	3	Leaves	16	0	0	0	0	0	0	0	0	0	0	0	0	0	0	0	0	0	0	0	0	0	0	0	0	0	0	0.000588859	0	0	0	0	0	0	0	0	0	0	0	0	0	0	0	0
sW3GLT3R1	1	1	1	3	Roots	16	0.000269657	0	0	0	0	0	0.000860196	0	0	0.000999978	0	0	0	0	0	0	0	0	0	0	0	0	0.000165286	0.00010714	0.000440357	0.000360894	0.0424252	0.00050915	0.00162472	0	0	0	0	0	0	0	0	0	0.000125324	0	0	0	0
sW3GLT3R2	1	1	1	3	Roots	16	0.000645584	0	0	0	0	0	0.00123563	0	0	0.00059851	0	0	0	0	0	0	0	0	0	0	0	0	0.000633135	0.000384756	0.00158138	0.000864015	0.0412455	0.000443255	0.00238941	0	0	0	0	0	0	0	0	0.000450055	0	0.000150018	0	0	0
sW3GLT3S1	1	1	1	3	Soils	16	0	0	0	0.000329467	0.00015191	0	0.000545568	9.7199e-05	0	8.80866e-05	0	0	0	0	0	0	0	0	0	0	0	8.93272e-05	0.00010483	5.66271e-05	0.000465485	0.000826557	0.0766668	0.00119872	0.00304231	0	0	0	0	0	0	0	6.62374e-05	0.000198712	0	6.62374e-05	0	0	0
sW3GLT3S2	1	1	1	3	Soils	16	0.000374497	0	0	0	0	0	0.00119463	0	0	0	0	0	0	0	0	0	0	0	0	0.00152077	0	0	0.000367275	0.000297591	0.000917346	8.35344e-05	0.0602311	0.000739243	0.00306226	0	0	0	0	0	0	0	0	0.000522145	0	0	0	0	0
sW3NLCL1	1	0	0	3	Leaves	0	0	0	0	0	0	0	0	0	0	0	0	0	0	0	0	0	0	0	0	0	0	0	0	0.00268989	0	0.000943821	0.00672214	0.000217889	0.000145681	0	0	0	0	0	0	0	0	0	0	0	0	0	0
sW3NLCL2	1	0	0	3	Leaves	0	0	0	0	0	0	0	0	0	0	0	0	0	0	0	0	0	0	0	0	0	0	0	0.000127733	0.00124197	0.00170154	0	0.00436082	8.94254e-05	8.96848e-05	0	0	0	0	0	0	0	0	0.000968502	0	0	0	0	0
sW3NLCR1	1	0	0	3	Roots	0	0.000326765	0	0	0	0	0	0.000833894	0	0	0.000807835	0	0	0	0	0	0	0	0	0	0.000884625	0	0	0	0.000129831	0.000533616	0.000437324	0.0357246	5.60888e-05	0.000956276	0	0	0	0	0	0	0	0	0	0	0	0	0	0
sW3NLCR2	1	0	0	3	Roots	0	0	0	0	0	0	0	0.000453953	0	0	0.000219883	0	0	0	0	0	0	0	0	0	0	0	0	0	0	0.00174293	0.000158713	0.0326356	0	0.000857417	0	0	0	0	0	0	0	0	0.000165343	0	0	0	0	0
sW3NLCS1	1	0	0	3	Soils	0	0	0	0	0	0	0	0.000963932	0	0	0.000466905	0	0	0	0	0	0	0	0	0	0	0	0	3.08697e-05	0.000700357	0.00534584	0.000112338	0.0601366	0.000129671	0.0019507	0	0	0	0	0	0	0	0	0.00140437	0.000117031	0.000117031	0	0	0
sW3NLCS2	1	0	0	3	Soils	0	0	0	0	0	0	0	0.001277	0	0.00018113	0.001944	0	0	0	0	0	0	0	0	0	0.000387053	0	0	3.50533e-05	0.000340831	0.00280169	0	0.0417144	0.00034357	0.00147672	0	0	0	0	0	0	0	0.000132892	0.000398675	0	0.000132892	0	0	0
sW3NLT1L1	1	1	0	3	Leaves	2	0	0	0	0	0	0	0	0	0	0	0	0	0	0	0	0	0	0	0	0	0	0	0.000258648	0	0	0	0.00012014	0	0	0	0	0	0	0	0	0	0	0	0	0	0	0	0
sW3NLT1L2	1	1	0	3	Leaves	2	0	0	0	0	0	0	0	0	0	0	0	0	0	0	0	0	0	0	0	0	0.000412015	0	0.00168126	0.00152574	0	0	0.004873	9.41634e-05	0.00028331	0	0	0	0	0	0	0	0	0	0	0	0	0	0
sW3NLT1R1	1	1	0	3	Roots	2	0.000351815	0	0	0	0	0	0	0	0	0.000869764	0	0	0	0	0	0	0	0	0	0.00023811	0.000264232	0	4.31288e-05	0.000279567	0.00172357	0.00047085	0.0324534	0.000301943	0.00109015	0	0	0	0	0	0	0	0	0.000163507	0	0	0	0	0
sW3NLT1R2	1	1	0	3	Roots	2	0.000634484	0	0	0	0	0	0.000404796	0	0	0.00058822	0	0.000198835	0	0	0	0	0	0	0	0	0	0	3.88906e-05	0.000378141	0.000518065	0.000566106	0.0381519	0.000163363	0.00141992	0	0.000148213	0	0	0	0	0	0	0	0.000147439	0	0	0	0
sW3NLT1S1	1	1	0	3	Soils	2	0	0	0	0	0	0	0.000863641	0	0	0.000836652	0	0.000169687	0	0	0	0	0	0	0	0	0	0	9.95685e-05	0.000968126	0.00751605	0.000362339	0.0410688	0.000139415	0.00107195	0	0	0	0	0	0	0	0	0.00138408	0	0	0	0	0.000125825
sW3NLT1S2	1	1	0	3	Soils	2	0	0	0	0	0	0	0.00103822	0.00018497	0	0.00251444	0	0	0	0	0	0	0	0.000214566	0	0	0	0	9.97464e-05	0.000107762	0.00265746	0.000120996	0.0369261	0.000232774	0.00140069	0	0	0	0	0	0	0	0	0.000252101	0	0	0	0	0
sW3NLT2L1	1	1	0	3	Leaves	4	0	0	0	0	0	0	0	0	0	0	0	0	0	0	0	0	0	0	0	0	0	0	0	0	0	0	0.000472505	0	0	0	0	0	0	0	0	0	0	0	0	0	0	0	0
sW3NLT2L2	1	1	0	3	Leaves	4	0	0	0	0	0	0	0	0	0	0	0	0	0	0	0	0	0	0	0	0	0	0	0.000437506	0	0.00116561	0.000318425	0.00804742	0	0.000245748	0	0	0	0	0	0	0	0	0	0	0	0	0	0
sW3NLT2R1	1	1	0	3	Roots	4	0.000327523	0.000320325	0	0	0	0	0	0	0	0.000404855	0	0	0	0	0	0	0	0	0	0	0	0	8.03017e-05	0.000390396	0.00160456	0.000438339	0.0298209	0.000281095	0.00101488	0	0.000153016	0	0	0	0	0	0	0.000152217	0	0	0	0	0
sW3NLT2R2	1	1	0	3	Roots	4	0.000630358	0	0	0	0	0	0.000402164	0	0	0.00155839	0	0.000197542	0	0	0	0	0	0	0	0.000213315	0	0	0.000115913	0.000375682	0.00102939	0.000140606	0.0335965	0.0001082	0.0011394	0	0	0	0	0	0	0	0	0.00043944	0.00014648	0	0	0	0
sW3NLT2S1	1	1	0	3	Soils	4	0.000262975	0	0	0	0	0	0.00100666	0	0.000166582	0.00162533	0	0	0	0	0	0	0	0	0	0.00177983	0	0	0.000612523	0.000313457	0.00171778	0.000117317	0.043081	0.000315976	0.00149392	0	0	0	0	0	0	0	0.000122218	0.000366655	0	0	0	0	0
sW3NLT2S2	1	1	0	3	Soils	4	0	0	0	0	0	0	0	0	0	0	0	0	0	0	0	0	0	0	0	0	0	0	0	0.000237141	0	0	0.0021411	0	0	0	0	0	0	0	0	0	0	0.000832162	0	0	0	0	0
sW3NLT3L1	1	1	0	3	Leaves	16	0	0	0	0	0	0	0	0	0	0	0	0	0	0	0	0	0	0	0	0	0	0	0	0	0	0.000824483	0.0121022	0	0.00010605	0	0	0	0	0	0	0	0	0	0	0	0	0	0
sW3NLT3L2	1	1	0	3	Leaves	16	0	0	0	0	0	0	0	0	0	0	0	0	0	0	0	0	0	0	0	0	0	0	0.000151123	0	0	0	0.00494876	0.0001058	0	0	0	0	0	0	0	0	0	0	0	0	0	0	0
sW3NLT3R1	1	1	0	3	Roots	16	0.00033212	0	0	0	0	0	0.000847561	0.000226503	0.000210382	0.00307903	0	0.00020816	0	0	0	0	0	0	0	0	0	0	0.000122143	0.000131958	0.000542361	0.00311144	0.0374448	0.00171024	0.00211542	0	0.0017068	0	0	0	0	0	0	0.000154353	0	0	0	0	0
sW3NLT3R2	1	1	0	3	Roots	16	0.000284515	0.000278262	0	0	0	0	0.000726074	0	0	0.000703384	0	0.000178323	0	0	0.000276741	0	0	0	0	0.000192561	0	0	0.000139514	0.000113044	0.000464621	0.0024116	0.0375696	0.00131859	0.00200811	0	0.00279138	0	0	0	0	0	0	0.000132229	0	0	0	0	0
sW3NLT3S1	1	1	0	3	Soils	16	0.00025168	0	0	0	0	0	0.0016057	0	0	0.000155552	0	0	0	0	0	0	0	0	0	0.000511015	0	0	3.08533e-05	0.000699984	0.003699	0.000336835	0.0414025	0.000345605	0.00246958	0	0	0	0	0	0	0	0	0.00128666	0	0.000350906	0	0	0.000116969
sW3NLT3S2	1	1	0	3	Soils	16	0.000249324	0	0	0	0	0	0.00111347	0	0.000157935	0.00107867	0	0	0	0	0	0	0	0	0	0.000168744	0.000187256	0	9.16936e-05	0.000495309	0.00325723	0.000222455	0.0414835	0.00034237	0.00214602	0	0	0	0.000115874	0	0	0.000115874	0.000115874	0.000347622	0	0.000231748	0	0.000115874	0
sW5GLCL1	1	0	1	5	Leaves	0	0	0	0	0	0	0	0	0	0	0	0	0	0	0	0	0	0	0	0	0	0	0	0	0	0	0	0	0	0	0	0	0	0	0	0	0	0	0	0	0	0	0	0
sW5GLCL2	1	0	1	5	Leaves	0	0	0	0	0	0	0	0	0	0	0	0	0	0	0	0	0	0	0	0	0	0	0	0	0	0	0	0.00176941	0.000111121	0	0	0	0	0	0	0	0	0	0	0	0	0	0	0
sW5GLCR1	1	0	1	5	Roots	0	0	0	0	0	0	0	0.00141987	0.000216827	0	0	0	0	0	0	0	0	0	0	0	0.000430356	0	0	0.000233851	0	0	0.000425503	0.0443176	0.000327436	0.00103989	0	0	0	0	0	0	0	0.000147759	0.000295519	0	0.000295519	0	0	0
sW5GLCR2	1	0	1	5	Roots	0	0.000271734	0	0	0.000314082	0.000144816	0	0	0.00018532	0	0	0	0	0	0	0	0	0	0	0	0.000551733	0	0.000170312	0.0014324	0.000107966	0	0.000363673	0.0453513	0.000186571	0.00187112	0	0	0	0	0	0	0	0	0.000126289	0	0	0	0	0
sW5GLCS1	1	0	1	5	Soils	0	0	0	0	0.000221171	0	0	0.000366241	0	0	0.000118265	0	0	0	0	0	0	0	0	0	0.000647535	0	0.000239862	0.000351863	0	0	0.00059755	0.0707684	0.000919663	0.00273405	0	0	0	0	0	0	0	0	0	0	0	0	0	0
sW5GLCS2	1	0	1	5	Soils	0	0.000416815	0	0	0	0	0	0.000132962	0	0	0	0	0	0.000201612	0	0	0	0	0.000164873	0	0.000846309	0.000156525	0	0.000689811	0	0.000340335	0.000650816	0.0646519	0.000429275	0.00247549	0	0	0	0	0	0	0	9.68578e-05	0.000193716	0	0	0	0	0
sW5GLT1L1	1	1	1	5	Leaves	0.25	0	0	0	0	0	0	0	0	0	0	0	0	0	0	0	0	0	0	0	0	0.000648617	0	0	0	0	0	0.000295052	0	0.000148668	0	0	0	0	0	0	0	0	0	0	0	0	0	0
sW5GLT1L2	1	1	1	5	Leaves	0.25	0	0	0	0	0	0	0	0	0	0	0	0	0	0	0	0	0	0	0	0	0	0	0	0	0	0	0.000135825	0	6.84381e-05	0	0	0	0	0	0	0	0	0	0	0	0	0	0
sW5GLT1R1	1	1	1	5	Roots	0.25	0	0	0	0	0	0	0.000346728	0.000555961	0	0	0	0	0	0	0	0	0	0	0	0.000183911	0.000204087	0	0.000366429	0	0	0.000242449	0.045537	0.000513071	0.00187112	0	0	0	0	0	0	0	0	0	0	0	0	0	0
sW5GLT1R2	1	1	1	5	Roots	0.25	0.000272368	0	0	0	0	0	0.000521307	0.000185753	0	0	0	0	0	0	0	0	0	0	0	0.000368681	0	0.00017071	0.000267116	0	0.000444785	0.000121508	0.0438288	0.000374014	0.00173483	0	0	0	0	0	0	0	0	0.000126584	0	0	0	0	0
sW5GLT1S1	1	1	1	5	Soils	0.25	0	0	0	0.000496248	0	0	0.00109566	0.000439208	0	0	0	0	0	0	0	0	0	0	0	0.00101703	0.000161228	0	0.00055264	0	0.000350561	0.000478836	0.0611671	0.000810651	0.00321506	0	0	0	0	0	0	0	0	0	0	0	0	0	0
sW5GLT1S2	1	1	1	5	Soils	0.25	0	0	0	0	0	0	0.000960624	0.000586785	0	0.000132944	0	0	0	0	0	0	0	0	0	0.000727904	0	0	0.000158214	0.000170927	0.000351264	0.000863633	0.0655521	0.000886119	0.00303636	0	0	0	0	0	0	0	0	0	0	0	0	0	0
sW5GLT2L1	1	1	1	5	Leaves	4	0	0	0	0	0	0	0	0	0	0	0	0	0	0	0	0	0	0	0	0	0	0	0	0	0	0	0.000242934	0	0	0	0	0	0	0	0	0	0	0	0	0	0	0	0
sW5GLT2L2	1	1	1	5	Leaves	4	0	0	0	0	0	0	0	0	0	0	0	0	0	0	0	0	0	0	0	0	0	0	0	0	0.000866426	0	0	0	0	0	0	0	0	0	0	0	0	0	0	0	0	0	0
sW5GLT2R1	1	1	1	5	Roots	4	0	0	0	0	0	0	0.000174288	0.000558925	0	0	0	0	0	0	0	0	0	0	0	0	0.000205175	0.00017122	0.000133957	0.000108541	0.000446114	0.000365612	0.0441931	0.000422023	0.00216327	0	0	0	0	0	0	0	0	0	0	0	0	0	0
sW5GLT2R2	1	1	1	5	Roots	4	0	0	0	0	0	0	0.000601596	0.000428724	0	0	0	0	0.000608135	0	0	0	0	0	0	0	0.000472139	0	0.00057798	0	0	0.000280443	0.0457467	0.00048557	0.00232668	0	0	0	0	0	0	0	0	0	0	0	0	0	0
sW5GLT2S1	1	1	1	5	Soils	4	0	0	0	0	0	0	0.000407858	0.000435986	0	0	0	0	0	0	0	0	0	0	0	0.000288447	0.000160045	0.000133559	0.000522462	8.46669e-05	0.000347989	0.000475323	0.0658146	0.000438929	0.0033382	0	0	0	0	0	0	0	0	0	0	0	0	0	0
sW5GLT2S2	1	1	1	5	Soils	4	0.000441593	0	0	0.000255206	0.00011767	0	0.000563467	0.000451745	0	0	0	0	0.000427193	0	0	0	0	0	0	0.00239098	0	0	0.000487212	0.000175454	0.00180283	0.000591004	0.0803386	0.000454794	0.00357289	0	0	0	0	0	0	0.000205231	0.000102616	0.000102616	0	0	0	0	0
sW5GLT3L1	1	1	1	5	Leaves	64	0	0	0	0	0	0	0	0	0	0	0	0	0	0	0	0	0	0	0	0	0	0	0	0	0	0	0.00011835	0	0	0	0	0	0	0	0	0	0	0	0	0	0	0	0
sW5GLT3L2	1	1	1	5	Leaves	64	0	0	0	0	0	0	0	0	0	0	0	0	0	0	0	0	0	0	0	0	0	0	0	0	0	0	0.000124889	0	0	0	0	0	0	0	0	0	0	0	0	0	0	0	0
sW5GLT3R1	1	1	1	5	Roots	64	0	0	0	0	0.0001722	0	0.000618437	0	0	0.000399407	0	0	0	0	0	0	0	0	0	0	0	0.000202516	0.000673381	0	0.00105531	0.000576588	0.0531541	0.000332775	0.0018912	0	0	0	0	0	0	0	0.000150169	0.000150169	0	0	0	0	0
sW5GLT3R2	1	1	1	5	Roots	64	0	0	0	0	0	0	0.00101445	0	0	0	0	0	0	0	0	0	0	0	0	0	0	0	9.74628e-05	0.000210589	0.000865541	0	0.0592592	0.000363911	0.00214418	0	0	0	0	0	0	0	0	0.000246329	0	0	0	0	0
sW5GLT3S1	1	1	1	5	Soils	64	0.000190049	0	0	0	0	0	0.000606248	0.00129612	0	0	0	0	0	0	0	0	0	0	0	0.000514504	0	0	0.000512555	7.55103e-05	0	0.000254351	0.0668781	0.000652433	0.00258459	0	0	0	0	0	0	0	0	0	0	0	0	0	0
sW5GLT3S2	1	1	1	5	Soils	64	0.000202221	0	0	0.000467471	0	0	0.00141917	0.000275826	0	0	0	0.000126744	0	0	0	0	0	0	0	0	0	0	0.000198321	0	0	0.000541282	0.0706088	0.000694219	0.00313305	0	0	0	0	0	0	0	0	0	0	0	0	0	0
sW5NLCL1	1	0	0	5	Leaves	0	0	0	0	0	0	0	0	0	0	0	0	0	0	0	0	0	0	0	0	0	0	0	0	0	0	0	0.000129625	0	0	0	0	0	0	0	0	0	0	0	0	0	0	0	0
sW5NLCL2	1	0	0	5	Leaves	0	0	0	0	0	0	0	0	0	0	0	0	0	0	0	0	0	0	0	0	0	0	0	0	0	0	0	9.14541e-05	0.00018379	0	0	0	0	0	0	0	0	0	0	0	0	0	0	0
sW5NLCR1	1	0	0	5	Roots	0	0.000705929	0	0	0	0	0	0	0.00012036	0	0.000654455	0	0.000110612	0	0	0	0	0	0	0	0	0	0	0.000584142	0.00876502	0.001441	0.000157463	0.0210431	0.000363516	0.000850665	0	0	0	0	0	0	0	0	8.20205e-05	8.20205e-05	0	0	0	0
sW5NLCR2	1	0	0	5	Roots	0	0.00107567	0	0	0	0	0	0	0	0	0.000664824	0	0.000168547	0	0	0	0	0	0	0	0	0	0	0.000197799	0.00106847	0.0035132	0.000359905	0.0516343	0.000138478	0.00189803	0	0	0	0	0	0	0	0	0.00049992	0.00012498	0	0	0	0
sW5NLCS1	1	0	0	5	Soils	0	0.000470643	0	0	0.000271995	0	0	0.00105094	0.000160488	0	0.000436326	0	0	0	0	0	0	0	0	0	0	0	0	5.7696e-05	9.34984e-05	0.000768574	0.000209961	0.0451434	0.000201964	0.00145836	0	0	0	0	0	0	0	0	0	0	0.000109366	0	0	0
sW5NLCS2	1	0	0	5	Soils	0	0	0	0	0	0.000142752	0	0.000341787	0	0	0.000993319	0	0	0	0	0	0	0	0	0	0.00036258	0.000402357	0	0.000197022	0.000319281	0	0.000238994	0.0382075	9.19562e-05	0.000876119	0	0	0	0	0	0	0	0.000124489	0	0	0.000124489	0	0	0.000124489
sW5NLT1L1	1	1	0	5	Leaves	0.25	0	0	0	0	0	0	0	0	0	0	0	0	0	0	0	0	0	0	0	0	0	0	8.62538e-05	0	0	0	0	0	0	0	0	0	0	0	0	0	0	0	0	0	0	0	0
sW5NLT1L2	1	1	0	5	Leaves	0.25	0.000600728	0	0	0	0	0	0	0	0	0	0	0	0	0	0	0	0	0	0	0.000813152	0	0	7.36429e-05	0	0	0	0.000205239	0	0	0	0	0	0	0	0	0	0	0	0	0	0	0	0
sW5NLT1R1	1	1	0	5	Roots	0.25	0.000587565	0	0	0	0	0	0.000374862	0	0	0.00254204	0.000364413	0.000184131	0	0	0	0	0	0	0	0	0	0	0.000108044	0.000466905	0.00335829	0.00484925	0.0593193	0.00352992	0.00318615	0	0.00452934	0	0	0	0	0	0	0	0	0.000136536	0	0	0
sW5NLT1R2	1	1	0	5	Roots	0.25	0.00179856	0.000293171	0	0	0	0	0.000191244	0.000204434	0.000189883	0.00277902	0	0	0	0	0	0	0	0	0	0.000405758	0	0	0.000771695	0.00250112	0.0176226	0.000267455	0.0458298	0.00015436	0.00258013	0	0	0	0	0	0	0	0.000278628	0.00278628	0.000417941	0.000417941	0	0.000139314	0
sW5NLT1S1	1	1	0	5	Soils	0.25	0.00145684	0.000284964	0	0	0	0	0.000557671	0	0	0.000720325	0	0	0	0	0.000283406	0	0	0	0	0	0	0	0	0.000347299	0.00333068	0.000259967	0.0456915	5.00129e-05	0.000802528	0	0	0	0	0	0	0	0	0.000812481	0	0.000270827	0	0	0
sW5NLT1S2	1	1	0	5	Soils	0.25	0	0	0	0	0	0	0.000525883	0	0	0.000679265	0	0	0	0	0	0	0	0	0	0	0	0	0.000101048	0.000218335	0.00224345	0.000122574	0.0425238	0.000141486	0.00113517	0	0	0	0	0	0	0	0.00025539	0.000510779	0	0	0	0	0
sW5NLT2L1	1	1	0	5	Leaves	4	0	0	0	0	0	0	0	0	0	0	0	0	0	0	0	0	0	0	0	0	0	0	0	0	0	0	0.000122687	0	0	0	0	0	0	0	0	0	0	0	0	0	0	0	0
sW5NLT2L2	1	1	0	5	Leaves	4	0	0	0	0	0	0	0	0	0	0	0	0	0	0	0	0	0	0	0	0	0	0	0	0	0	0	0	0	0	0	0	0	0	0	0	0	0	0	0	0	0	0	0
sW5NLT2R1	1	1	0	5	Roots	4	0.000300555	0.000293949	0	0	0	0	0.000767007	0	0	0.00204335	0	0	0	0	0	0	0	0	0	0	0.000225733	0	0.000221069	0.00119417	0.0176693	0.000134082	0.0331158	0.00010318	0.00165567	0	0	0	0	0	0	0	0.000139683	0.00963815	0	0.00125715	0	0	0
sW5NLT2R2	1	1	0	5	Roots	4	0.00139374	0	0	0.000322189	0	0	0.000355678	0.000190104	0	0.00241194	0.000172882	0.000174708	0	0	0	0	0	0	0	0	0.000209355	0	6.83432e-05	0.000221505	0	0.000746122	0.0389509	0.000287081	0.00206338	0	0	0	0	0	0	0	0	0	0	0	0	0	0
sW5NLT2S1	1	1	0	5	Soils	4	0.00100252	0	0	0.000869065	0	0	0.000799498	0	0.000158762	0.00139412	0	0	0	0	0	0	0	0	0	0	0	0	0.000276521	0.000497902	0.00245571	0.000223619	0.0441838	0.000258121	0.00207096	0	0	0	0	0	0	0	0	0.00209665	0	0.000465921	0	0	0
sW5NLT2S2	1	1	0	5	Soils	4	0.00271651	0	0	0.000627972	0	0	0.00121318	0	0	0.00151106	0	0	0	0	0	0	0	0	0	0	0	0	0.000199809	0	0.00133084	0.00109069	0.0437598	0.000606172	0.00187056	0	0.000634565	0	0	0	0	0	0	0.000378751	0	0	0	0.00012625	0
sW5NLT3L1	1	1	0	5	Leaves	64	0	0	0	0	0	0	0	0	0	0	0	0	0	0	0	0	0	0	0	0	0	0	0	0	0	0	9.15454e-05	0	0	0	0	0	0	0	0	0	0	0	0	0	0	0	0
sW5NLT3L2	1	1	0	5	Leaves	64	0	0	0	0	0	0	0	0	0	0	0	0	0	0	0	0	0	0	0	0	0.000484888	0	0	0	0	0	0	0	0	0	0	0	0	0	0	0	0	0	0	0	0	0	0
sW5NLT3R1	1	1	0	5	Roots	64	0.000747185	0	0	0	0	0	0.000238349	0.000254787	0.000236653	0.00184721	0	0	0	0	0	0	0	0	0	0	0	0.000234153	9.15971e-05	0	0.000610087	0.000833327	0.0354834	0.00019238	0.00173645	0	0	0	0	0	0	0	0	0.000347256	0	0	0	0	0
sW5NLT3R2	1	1	0	5	Roots	64	0.00191736	0	0	0	0	0	0.000611633	0.000217938	0.000202426	0.00355511	0	0.000400576	0	0	0	0	0	0	0	0	0	0	0.000117524	0	0	0.00114049	0.0430162	0.000219409	0.00319066	0	0.000447888	0	0	0	0	0	0	0	0	0	0	0	0
sW5NLT3S1	1	1	0	5	Soils	64	0.00136147	0	0	0	0	0	0.000694888	0	0	0.00218781	0	0.000170664	0	0	0	0	0	0	0	0	0.000204508	0	0.000333805	0.000108188	0	0.00024295	0.0453985	0.000420652	0.00271873	0	0	0	0	0	0	0	0.000253099	0.000379648	0	0	0	0	0
sW5NLT3S2	1	1	0	5	Soils	64	0.00116617	0	0	0	0	0	0.00208322	0	0.000147743	0.000576607	0	0	0	0	0	0	0	0	0	0	0.000175172	0	0.000228736	9.26689e-05	0.000380878	0.000208099	0.0467749	0.000280241	0.00273024	0	0	0	0.000108396	0	0	0.000108396	0	0.000216792	0.000108396	0	0	0	0
W1GLCL1	0	0	1	1	Leaves	0	0	0	0	0	0	0	0	0	0	0	0	0	0	0	0	0	0	0	0	0	0	0	0	0	0	0	0.000267006	0.000134147	0	0	0	0	0	0	0	0	0	0	0	0	0	0	0
W1GLCL2	0	0	1	1	Leaves	0	0	0	0	0	0	0	0	0	0	0	0	0	0	0	0	0	0	0	0	0	0	0	0	0	0	0	0	0	0	0	0	0	0	0	0	0	0	0	0	0	0	0	0
W1GLCR1	0	0	1	1	Roots	0	0.000311036	0	0	0	0	0	0.000396877	0	0	0.000192237	0	0	0	0	0	0	0	0	0	0.00126307	0.000233605	0	0.000305038	0.000370744	0.00609516	0	0.0351739	0.000373723	0.00160632	0	0	0	0	0	0	0	0	0.000578218	0	0.000144555	0	0.000144555	0
W1GLCR2	0	0	1	1	Roots	0	0	0	0	0	0	0	0.000182877	0	0	0.000177162	0.000177779	0	0	0	0	0	0	0	0	0	0	0	0.000316256	0.000341669	0.00655336	0	0.0349128	0.000196808	0.00162838	0	0	0	0	0	0	0	0.000133218	0.000932528	0	0	0	0	0
W1GLCS1	0	0	1	1	Soils	0	0.00019748	0	0	0	0	0	0.000125991	0	0	0	0	0	0	0	0	0	0	0	0	0.0104251	0	0.000618864	0.000629434	7.84631e-05	0.00612732	0.000264297	0.0464188	0.000474562	0.00125784	0	0	0	0	0	0	0	0	0.000275338	9.17793e-05	0	0	0	0
W1GLCS2	0	0	1	1	Soils	0	0	0	0	0	0	0	8.57981e-05	0	0	0	0	0	0	0	0	0	0	0	0	0.00309461	0	0.000674301	0.00121996	0.00101521	0.00724719	0.000359965	0.055824	0.000831009	0.00233821	0	0	0	0	0	0	0	0.000250002	0.000875007	0.000125001	6.25005e-05	0	0	0
W1GLT1L1	0	1	1	1	Leaves	4	0	0	0	0	0	0	0	0	0	0	0	0	0	0	0	0	0	0	0	0	0	0	0	0	0	0	0.000276924	0	9.30221e-05	0	0	0	0	0	0	0	0	0	0	0	0	0	0
W1GLT1L2	0	1	1	1	Leaves	4	0	0	0	0	0	0	0	0	0	0	0	0	0	0	0	0	0	0	0	0	0	0	0	0	0	0.000220588	0.000253401	0	0	0	0	0	0	0	0	0	0	0	0.000229804	0	0	0	0
W1GLT1R1	0	1	1	1	Roots	4	0.000263027	0	0	0.000304018	0	0	0.000335619	0	0	0.000487696	0	0	0	0	0	0	0	0	0	0	0.000197548	0	0.000128977	0.00114957	0.00601342	0.000938723	0.0389108	0.000722373	0.00253564	0	0.00061442	0	0	0	0	0	0.000122242	0.00183363	0.000122242	0.000488969	0	0.000122242	0
W1GLT1R2	0	1	1	1	Roots	4	0.000182421	0	0	0	0	0	0.00034915	0	0	0.00090197	0.000113139	0	0	0	0	0	0	0	0	0	0	0.000114334	0.000335443	0.000217439	0.00178739	8.13807e-05	0.060174	0.000751497	0.00263787	0	0	0	0	0	0	0	0	0.000254341	8.47805e-05	0	0	0	0
W1GLT1S1	0	1	1	1	Soils	4	0	0	0	0	0.000166917	0	9.99108e-05	0	0	0.000193577	0	0	0	0	0	0	0	0	0	0	0.000117616	0.000490759	0.000499141	0.00180442	0.0109966	0.000349312	0.0515235	0.000591372	0.0017523	0	0	0	0	0	0	7.2781e-05	0.000363905	0.00320236	0.00072781	7.2781e-05	0	7.2781e-05	0
W1GLT1S2	0	1	1	1	Soils	4	0	0	0.000105056	0	0.000226468	0	9.03709e-05	0	0	8.75468e-05	0	0	0	0	0	0	0	0	0	0	0	0.000443899	0.000399387	0.00123816	0.0106406	0.000189575	0.0540566	0.000680788	0.00195075	0	0	0	0	0	0	0.000131663	0.000131663	0.00283076	0.000526652	6.58316e-05	0	6.58316e-05	0
W1GLT2L1	0	1	1	1	Leaves	4	0	0	0	0	0	0	0	0	0	0	0	0	0	0	0	0	0	0	0	0	0	0	0	0	0	0	0	0	0	0	0	0	0	0	0	0	0	0	0	0	0	0	0
W1GLT2L2	0	1	1	1	Leaves	4	0	0	0	0	0	0	0	0	0	0	0	0	0	0	0	0	0	0	0	0	0	0	8.154e-05	0	0	0	0.000113624	0	0	0	0	0	0	0	0	0	0	0	0	0	0	0	0
W1GLT2R1	0	1	1	1	Roots	4	0	0	0	0	0	0	0.000510543	0	0	0.000618236	0	0	0	0	0	0	0	0	0	0	0	0.000125389	0.0001962	7.94874e-05	0.00326701	0.000446245	0.0547142	0.000309058	0.00237632	0	0	0	0	0	0	0	0	0.000464887	0	0	0	0	0
W1GLT2R2	0	1	1	1	Roots	4	0	0.000346431	0	0	0	0	0.000677961	0	0	0.0008757	0	0	0	0	0	0	0	0	0	0	0	0	0.000130269	0.000422212	0.000578444	0.000474063	0.0353373	6.08007e-05	0.000975634	0	0	0	0	0	0	0	0	0.000823112	0.000164622	0	0	0	0
W1GLT2S1	0	1	1	1	Soils	4	0	0	0	0.000171033	0	0	0.00018881	0	0	0.00018291	0	0	0	0	0	0	0	0	0	0	0	0.000185486	0.000453496	0.000411547	0.00579942	0.00026405	0.0607163	0.000787377	0.00285297	0	0	0	0	0	0	0	0	0.000206311	0.000275081	0	0	0.000137541	0
W1GLT2S2	0	1	1	1	Soils	4	0	0.000152919	0	0	0	0	9.97535e-05	0	0	0	0	0	0	0	0	0	0	0	0	0.000105822	0	0.000195995	0.000575025	0.00037274	0.00204266	0.000418515	0.0673612	0.000778308	0.00288002	0	0	0	0	0	0	7.26664e-05	7.26664e-05	0.000435998	0.000217999	0	0	0	7.26664e-05
W1GLT3L1	0	1	1	1	Leaves	4	0	0	0	0	0	0	0	0	0	0	0	0	0	0	0	0	0	0	0	0	0	0	0	0	0	0	0.000132819	0	0	0	0	0	0	0	0	0	0	0	0	0	0	0	0
W1GLT3L2	0	1	1	1	Leaves	4	0	0	0	0	0	0	0	0	0	0	0	0	0	0	0	0	0	0	0	0	0	0	0	0	0	0	0.000193533	0	9.75153e-05	0	0	0	0	0	0	0	0	0.000526532	0	0	0	0	0
W1GLT3R1	0	1	1	1	Roots	4	0	0	0	0	0	0	0.000516971	0	0	0.000375612	0	0	0	0	0	0	0	0	0	0	0	0.000253935	0.000124169	0.000241465	0.0023157	0.000542236	0.0525654	0.000417266	0.00195289	0	0	0	0	0	0	0	0	0.000376592	0	9.41481e-05	0	0	0
W1GLT3R2	0	1	1	1	Roots	4	0.000192187	0	0.000142539	0	0	0	0.000490455	0	0	0.000593911	0	0	0	0	0	0	0	0	0	0	0	0.000120455	0.000164921	0.00015272	0.00564924	0.000428688	0.0471773	0.000428853	0.00201815	0	0	0	0	0	0	0	8.93192e-05	0.000267958	0	0	0	8.93192e-05	0
W1GLT3S1	0	1	1	1	Soils	4	0	0	0.000100603	0	0	0	0	0	0	0.000167672	0	0	0	0	0	0	0	0	0	0	0	0.0005101	0.000448972	0.000754523	0.00996801	0.000544618	0.0568166	0.000745064	0.00170461	0	0	0	0	0	0	0	0.000126082	0.00289989	0	0.000126082	0	0	0
W1GLT3S2	0	1	1	1	Soils	4	0	0	0	0.000158311	0	8.52443e-05	0	0	0	0.000169305	0	0	0	0	0	0	0	0	0	0	0.000102869	0.000171689	0.00092348	0.000272097	0.00290769	0.000611024	0.0751283	0.00075232	0.00257002	0	0	0	0	0	0	0.00012731	0.00038193	0.00050924	0.000318275	0.00025462	0	0	6.3655e-05
W1NLCL1	0	0	0	1	Leaves	0	0	0	0	0	0	0	0	0	0	0	0	0	0	0	0	0	0	0	0	0	0	0	7.49811e-05	0	0	0	0.000522421	0	0	0	0	0	0	0	0	0	0	0	0	0	0	0	0
W1NLCL2	0	0	0	1	Leaves	0	0	0	0	0	0	0	0	0	0	0	0	0	0	0	0	0	0	0	0	0	0	0	0	0	0	0	0	0	0	0	0	0	0	0	0	0	0	0	0	0	0	0	0
W1NLCR1	0	0	0	1	Roots	0	0.000930625	0	0	0	0	0	0	0	0	0.00191726	0	0.000194426	0	0	0	0	0	0	0	0.000209951	0	0	0.000152113	0.000739515	0.00607895	0.000276777	0.0218325	5.3247e-05	0.00074762	0	0	0	0	0	0	0.00014417	0	0.00129753	0	0.00014417	0	0.00014417	0
W1NLCR2	0	0	0	1	Roots	0	0.00027898	0	0	0	0	0	0.000177987	0	0	0.0013794	0	0	0	0	0	0	0	0	0	0	0	0	0.0002052	0.00110845	0.0104784	0.000248914	0.0284035	0	0.000768409	0	0	0	0	0	0	0	0.000129656	0.00272279	0.000129656	0.000259313	0	0	0
W1NLCS1	0	0	0	1	Soils	0	0.000661047	0	0	0	0	0.000411421	0.000421743	0	0	0.000817128	0	0	0	0	0	0	0	0	0	0	0	0	0.000121556	0.0038084	0.026448	0.000147452	0.0418947	5.6734e-05	0.00130867	0.000267424	0	0	0	0	0	0.000153611	0	0.00245778	0	0.000614446	0	0.000153611	0
W1NLCS2	0	0	0	1	Soils	0	0	0	0	0	0	0	0.000339279	0.000181339	0	0.00197206	0.000164911	0	0	0	0	0	0	0	0	0	0	0	0.00016298	0.00327503	0.016066	0.00011862	0.0412884	0.000182563	0.00128165	0	0	0	0	0.000123576	0	0	0.000247151	0.00630236	0.000123576	0.000617878	0	0	0
W1NLT1L1	0	1	0	1	Leaves	4	0	0	0	0	0	0	0	0	0	0	0	0	0	0	0	0	0	0	0	0	0	0	0	0	0	0	0.000138501	0	0	0	0	0	0	0	0	0	0	0	0	0	0	0	0
W1NLT1L2	0	1	0	1	Leaves	4	0	0	0	0	0	0	0	0	0	0	0	0	0	0	0	0	0	0	0	0	0	0	0	0	0	0	0	0	0	0	0	0	0	0	0	0	0	0	0	0	0	0	0
W1NLT1R1	0	1	0	1	Roots	4	0	0	0	0	0	0	0	0	0	0.000951512	0	0	0	0	0	0	0	0	0	0	0	0	3.77459e-05	0.00207973	0.0251409	0.000274722	0.0332419	5.28516e-05	0.0010601	0	0	0	0	0	0	0	0.000572398	0.00858597	0.000143099	0.000429298	0	0	0
W1NLT1R2	0	1	0	1	Roots	4	0.000655873	0.00021382	0	0	0	0	0.000557923	0	0	0.000945855	0.000135593	0	0	0	0	0	0	0	0	0	0	0	5.36021e-05	0.000955506	0.00999655	0.000390127	0.0302881	0.000150107	0.00146779	0	0	0	0	0	0	0	0.000101606	0.00406425	0.000203212	0.000304818	0	0	0.000101606
W1NLT1S1	0	1	0	1	Soils	4	0.00112481	0.000550046	0	0	0	0	0.000538217	0	0	0.00173799	0	0	0	0	0	0	0	0	0	0	0.000211199	0	0.000103418	0.00391048	0.043166	0	0.0380931	4.82683e-05	0.00106498	0	0	0	0	0	0	0.00013069	0.00013069	0.0125462	0.00104552	0.000522759	0	0.00013069	0
W1NLT1S2	0	1	0	1	Soils	4	0.000271477	0.00026551	0	0	0	0	0.0001732	0	0	0.00117451	0	0	0	0	0	0	0	0	0	0.000367474	0	0	3.32802e-05	0.00550104	0.0469929	0.00036333	0.0346886	0.000186395	0.000934678	0	0	0	0.000126169	0	0	0.000252339	0.00100936	0.0196824	0.000252339	0.00264956	0	0	0
W1NLT2L1	0	1	0	1	Leaves	4	0	0	0	0	0	0	0	0	0	0	0	0	0	0	0	0	0	0	0	0	0	0	0	0	0.000651054	0	0.000136209	0	0	0	0	0	0	0	0	0	0	0	0	0	0	0	0
W1NLT2L2	0	1	0	1	Leaves	4	0	0	0	0	0	0	0	0	0	0	0	0	0	0	0	0	0	0	0	0	0	0	0	0	0	0	6.41528e-05	0	0	0	0	0	0	0	0	0	0	0	0	0	0	0	0
W1NLT2R1	0	1	0	1	Roots	4	0.000488416	0	0	0	0	0	0.000779015	0	0	0.00166028	0	0	0	0	0	0	0	0	0	0	0.000183414	0	0	0.00126138	0.011964	0.000544725	0.0540234	0.000293426	0.00163955	0	0	0	0.000113496	0	0	0	0	0.00442635	0.000113496	0	0	0	0
W1NLT2R2	0	1	0	1	Roots	4	0.000645368	0	0	0.000248648	0	0	0.00041174	0	0.00013627	0.00119662	0.000133421	0.00013483	0	0	0	0	0	0	0	0.000145596	0	0	7.91154e-05	0.00162398	0.0147547	0.000287909	0.0373731	7.38512e-05	0.00129615	0	0	0	0	0	0	9.99787e-05	0.000499893	0.00299936	0.000399915	0.000499893	0	0	0
W1NLT2S1	0	1	0	1	Soils	4	0.000557206	0	0	0	0	0	0.000355494	0	0	0.00154973	0	0	0	0	0	0	0	0	0	0	0.000209246	0	3.41538e-05	0.00464919	0.0432218	0	0.0463551	0.00023911	0.00105514	0	0	0	0	0	0	0.000517925	0.00103585	0.0055677	0.00258963	0.000647407	0	0.000258963	0
W1NLT2S2	0	1	0	1	Soils	4	0.000203104	0	0	0	0.000108241	0	0.000259158	0	0.000128657	0.00251059	0	0	0	0	0.000197555	0	0	0	0	0	0.000152542	0	9.95936e-05	0.00540673	0.058043	0.000362431	0.0394138	0.000104588	0.00125869	0	0	0	0	0	0	0.00226543	0.00141589	0.0146309	0.00462525	0.00330375	0	9.43929e-05	0
W1NLT3L1	0	1	0	1	Leaves	4	0	0	0	0	0	0	0	0	0	0	0	0	0	0	0	0	0	0	0	0	0	0	0	0	0	0	0.00145636	0	0	0	0	0	0	0	0	0	0	0	0	0	0	0	0
W1NLT3L2	0	1	0	1	Leaves	4	0	0	0	0	0	0	0	0	0	0	0	0	0	0	0	0	0	0	0	0	0	0	0	0	0	0	0.000132697	0	0	0	0	0	0	0	0	0	0	0	0	0	0	0	0
W1NLT3R1	0	1	0	1	Roots	4	0.000261692	0	0	0	0	0	0.000333916	0	0	0.00177914	0	0	0	0	0	0	0	0	0	0	0	0	6.41615e-05	0.000935784	0.0111111	0.00046698	0.0341089	8.98384e-05	0.000810892	0	0	0	0	0	0	0	0	0.00206757	0.000243244	0.000243244	0	0	0
W1NLT3R2	0	1	0	1	Roots	4	0	0.000255691	0	0	0	0	0.00033359	0	0	0.000969496	0	0	0	0	0.000508588	0	0	0	0.000241118	0	0	0	3.20495e-05	0.00270074	0.0175043	0.000116631	0.0416679	0	0.00153019	0	0	0	0	0	0	0	0.00036451	0.00558916	0	0.000607517	0	0.000121503	0
W1NLT3S1	0	1	0	1	Soils	4	0	0	0	0	0.000173728	0	0.0008319	0	0.000619484	0.00322361	0.000202178	0.000204314	0	0	0	0	0	0	0	0.000441255	0	0	0	0.000388561	0.00745276	0.000145426	0.036029	5.59547e-05	0.00101011	0	0	0	0	0	0	0	0	0.00151501	0.000151501	0.000303003	0	0.000151501	0
W1NLT3S2	0	1	0	1	Soils	4	0	0.000286083	0	0	0	0	0.000933101	0	0	0.0016271	0	0	0	0	0	0	0	0	0	0	0.000219692	0	7.17177e-05	0.00476506	0.050634	0.000260988	0.0368267	0.000301256	0.00140994	0	0	0	0.000135945	0	0	0	0.000679726	0.0178088	0.000271891	0.000815672	0	0.000135945	0
W3GLCL1	0	0	1	3	Leaves	0	0	0	0	0	0	0	0	0	0	0	0	0	0	0	0	0	0	0	0	0	0	0	0.000380537	0	0	0	8.83781e-05	0	0	0	0	0	0	0	0	0	0	0	0	0	0	0	0
W3GLCL2	0	0	1	3	Leaves	0	0	0	0	0	0	0	0	0	0	0	0	0	0	0	0	0	0	0	0	0	0	0	8.01614e-05	0	0	0	0	0	0	0	0	0	0	0	0	0	0	0	0	0	0	0	0
W3GLCR1	0	0	1	3	Roots	0	0.000351599	0	0	0	0	0	0	0	0	0.000217308	0	0	0	0	0.000341993	0	0	0	0	0.000475929	0.00026407	0	8.62048e-05	0	0.000574171	0.000156854	0.0308118	0.000120703	0.000726321	0	0	0	0	0	0	0	0	0.000163406	0	0.000326813	0	0	0
W3GLCR2	0	0	1	3	Roots	0	0.000336257	0	0	0.00038866	0	0	0.00128718	0.000458649	0	0.000415651	0	0	0	0	0.000327069	0	0	0	0	0.000227581	0	0	0.000247329	0.000133602	0.000549117	0.000150009	0.0350966	0.000173154	0.00144714	0	0	0	0	0	0	0	0	0.000468828	0	0	0	0	0
W3GLCS1	0	0	1	3	Soils	0	0	0	0	0.000218705	0	0	0.000362157	0.000516178	0.00011986	0.000116947	0	0	0	0	0	0	0	0	0	0.00396996	0.000142112	0.000118594	0.000765469	7.518e-05	0.00308997	0.000759714	0.0643552	0.000422226	0.00205211	0	0	0	0	0	0	0	0	0.000351756	0	0	0	0	0
W3GLCS2	0	0	1	3	Soils	0	0	0	0	0	0	0	0.000582392	0.000373534	0	0	0	0	0	0	0	0	0	0	0	0.00407763	0	0	4.47623e-05	0	0.000298142	0.000733025	0.0558257	0.000752111	0.00210573	0	0	0	0	0	0	0	0	0	0	0	0	0	0
W3GLT1L1	0	1	1	3	Leaves	2	0	0	0	0	0	0	0	0	0	0	0	0	0	0	0	0	0	0	0	0	0	0	0.000321246	0	0	0	0.000149216	0	0	0	0	0	0	0	0	0	0	0	0	0	0	0	0
W3GLT1L2	0	1	1	3	Leaves	2	0	0	0	0	0	0	0	0	0	0	0	0	0	0	0	0	0	0	0	0	0	0	0.000177203	0	0	0	0.000123464	0	0	0	0	0	0	0	0	0	0	0	0	0	0	0	0
W3GLT1R1	0	1	1	3	Roots	2	0	0	0	0.000329531	0	0	0.00127324	0.000194436	0	0	0	0	0	0	0	0	0	0	0	0	0.000214126	0	0.000139801	0	0.000931151	0.000508749	0.0427606	0.000244685	0.00157053	0.000230672	0	0	0	0	0	0	0	0.000132501	0	0.000132501	0	0	0
W3GLT1R2	0	1	1	3	Roots	2	0.000288577	0.000282234	0	0.00033355	0	0	0.00055233	0	0	0.000178356	0	0	0	0	0	0	0	0	0	0.000195311	0.000216737	0	7.0753e-05	0.000229315	0.000471254	0.000257477	0.0395356	0.000297203	0.000695487	0	0	0	0	0	0	0	0	0	0	0.000134117	0	0	0
W3GLT1S1	0	1	1	3	Soils	2	0	0	0	0	0.000102673	0	0.000860394	0.00039417	0	0.000119072	0	0	0	0	0	0	0	0	0	0.00182547	0	0.000120749	0.000307029	0.000229639	0.000314613	0.00120326	0.0749374	0.000859801	0.00298487	0	0	0	0	0	0	8.95374e-05	0	0	0	0	0	0	0
W3GLT1S2	0	1	1	3	Soils	2	0	0	0	0	0.00018545	0	0.000111004	0.00011866	0	0	0	0	0	0	0	0	0	0	0	0	0	0.0002181	0.000127976	0.000414779	0.00227304	0.000232859	0.0724619	0.000686899	0.00269567	0	0	0	0	0	0	0	0	0.000161724	0.000161724	0	0	0	0
W3GLT2L1	0	1	1	3	Leaves	4	0	0	0	0	0	0	0	0	0	0	0	0	0	0	0	0	0	0	0	0	0	0	0	0	0	0	0	0	0	0	0	0	0	0	0	0	0	0	0	0	0	0	0
W3GLT2L2	0	1	1	3	Leaves	4	0	0	0	0	0	0	0	0	0	0	0	0	0	0	0	0	0	0	0	0	0	0	0.000143482	0	0	0	9.99695e-05	0	0	0	0	0	0	0	0	0	0	0	0	0	0	0	0
W3GLT2R1	0	1	1	3	Roots	4	0.000587244	0	0	0	0	0	0.000561986	0.000200248	0.000185995	0.000362949	0	0	0	0	0	0	0	0	0	0	0	0	0.000179975	0	0.000479492	0.000392968	0.0450419	0.000251999	0.00166802	0	0	0	0	0	0	0	0	0	0	0	0	0	0
W3GLT2R2	0	1	1	3	Roots	4	0.000328218	0	0	0	0	0	0.0012564	0.000223842	0	0	0	0	0	0	0	0	0	0	0	0.00022214	0	0	8.04721e-05	0	0	0.000292846	0.0380701	0.000394368	0.00180805	0	0	0	0	0	0	0	0	0	0	0	0	0	0
W3GLT2S1	0	1	1	3	Soils	4	0	0	0	0	0	0	0.000253156	0.000135308	0	0	0	0	0	0	0	0	0	0	0	0.000537115	0.00014901	0.000248699	0.000145931	0	0.000323994	0.000619567	0.0775784	0.00064705	0.00368864	0	0	0	0	0	0	0	9.2207e-05	0.000184414	0	9.2207e-05	0	0	0
W3GLT2S2	0	1	1	3	Soils	4	0	0	0	0	0.00010166	0	0.000243402	0.000650471	0	0.000117898	0	0	0	0	0	0	0	0	0	0	0.000286536	0	0.000584617	0	0	8.50992e-05	0.0688541	0.000753091	0.00262705	0	0	0	0	0	0	0	0	0	0	0	0	0	0
W3GLT3L1	0	1	1	3	Leaves	16	0	0	0	0	0	0	0	0	0	0	0	0	0	0	0	0	0	0	0	0	0	0	0	0	0	0	0	0	0	0	0	0	0	0	0	0	0	0	0	0	0	0	0
W3GLT3L2	0	1	1	3	Leaves	16	0	0	0	0	0	0	0	0	0	0	0	0	0	0	0	0	0	0	0	0	0	0	0.000213123	0	0	0	0.000148491	0	0	0	0	0	0	0	0	0	0	0	0	0	0	0	0
W3GLT3R1	0	1	1	3	Roots	16	0.000287391	0	0	0	0	0	0.000733414	0.000195999	0	0.000532871	0	0	0	0	0	0	0	0	0	0	0	0	0.000140925	0	0.000469318	0.00012821	0.0344638	0.000295983	0.00173157	0	0	0	0	0	0	0	0	0	0	0	0	0	0
W3GLT3R2	0	1	1	3	Roots	16	0	0	0	0	0	0	0.000688526	0	0	0.000166752	0	0	0	0	0.00026243	0	0	0	0	0.000365207	0.000405272	0	0.000198449	0.000214396	0.000440593	0.000120363	0.037839	0.000231556	0.00171848	0	0	0	0	0	0	0.000125391	0.000125391	0.000626954	0	0.000250782	0	0	0
W3GLT3S1	0	1	1	3	Soils	16	0	0	0	0	0	0	0.000814424	0.000746221	0	0	0	0	0	0	0	0	0	0	0	0.00123424	0	0.000228596	0.000760097	7.24567e-05	0.00119122	0.000732194	0.0666969	0.000751258	0.00257425	0	0	0	0	0	0	0	0	8.47536e-05	8.47536e-05	0	0	0	0
W3GLT3S2	0	1	1	3	Soils	16	0	0	0	0	0	0	0.000554111	0.00023693	0	0	0	0	0	0	0	0	0	0	0	0.000587821	0	0.000435484	0.000298121	6.90165e-05	0.000567328	0.000387461	0.0798503	0.000834853	0.00281085	0	0	0	0	0	0	0	0	0	0	0	0	0	0
W3NLCL1	0	0	0	3	Leaves	0	0	0	0	0	0	0	0	0	0	0	0	0	0	0	0	0	0	0	0	0	0	0	8.33031e-05	0	0	0	0.000232162	0	0	0	0	0	0	0	0	0	0	0	0	0	0	0	0
W3NLCL2	0	0	0	3	Leaves	0	0	0	0	0	0	0	0	0	0	0	0	0	0	0	0	0	0	0	0	0	0	0	0	0	0	0	0.000245517	0	0	0	0	0	0	0	0	0	0	0	0	0	0	0	0
W3NLCR1	0	0	0	3	Roots	0	0.000837811	0	0	0	0	0	0.000356345	0	0	0.00103563	0	0	0	0	0	0	0	0	0	0	0	0.000175036	0.000171178	0.000443841	0.00410451	0.000622934	0.0529542	4.79365e-05	0.00173072	0	0	0	0	0	0	0	0	0.00103833	0.000129791	0.000259583	0	0	0
W3NLCR2	0	0	0	3	Roots	0	0	0	0	0	0	0	0.000395029	0	0	0.000574027	0.000192009	0	0	0	0	0	0	0	0	0	0	0	0.000265665	0.00172208	0.00960574	0	0.0363852	0.000159421	0.00122578	0	0	0	0	0	0	0.000143881	0.000719407	0.00517973	0.000575526	0.000863289	0	0	0
W3NLCS1	0	0	0	3	Soils	0	0.000611271	0	0	0	0	0	0.000389987	0	0	0	0	0	0	0	0	0	0	0	0	0	0	0	3.74677e-05	0	0.000499112	0.000681744	0.0474592	0.000209848	0.0011049	0	0	0	0	0	0	0	0	0.000142045	0	0	0	0.000142045	0
W3NLCS2	0	0	0	3	Soils	0	0.000227889	0	0	0.000263404	0.00012145	0	0.000581567	0.000155419	0	0.000422545	0	0.000142832	0	0	0	0	0	0	0	0	0.000171157	0	8.38105e-05	0.00452726	0.0461465	0.00020333	0.0476883	0.000117351	0.00117691	0	0	0	0	0	0	0.000105912	0.00105912	0.0229829	0	0.00233006	0	0	0
W3NLT1L1	0	1	0	3	Leaves	2	0	0	0	0	0	0	0	0	0	0	0	0	0	0	0	0	0	0	0	0	0	0	0.000204314	0	0	0	9.49023e-05	0	0	0	0	0	0	0	0	0	0	0	0	0	0	0	0
W3NLT1L2	0	1	0	3	Leaves	2	0	0	0	0	0	0	0	0	0	0	0	0	0	0	0	0	0	0	0	0	0	0	0	0	0	0	0	0	0	0	0	0	0	0	0	0	0	0	0	0	0	0	0
W3NLT1R1	0	1	0	3	Roots	2	0.000598293	0	0	0	0	0	0.000190853	0	0	0.000924445	0.000185533	0	0	0	0.000290973	0	0	0	0	0.000202464	0	0	0.000220033	0.00237715	0.000977029	0.000667269	0.033625	0.000154045	0.00216288	0	0	0	0	0	0	0	0	0.00111223	0	0	0	0	0
W3NLT1R2	0	1	0	3	Roots	2	0.000322585	0	0	0	0	0	0.00061742	0	0	0.00179438	0	0	0	0	0	0	0	0	0	0	0	0	0	0.00012817	0.00105358	0.00043173	0.0300326	0.000110743	0.00105511	0	0	0	0	0	0	0	0	0.000449766	0	0	0	0	0
W3NLT1S1	0	1	0	3	Soils	2	0.000269062	0.000263148	0	0	0	0	0.000171659	0	0	0.000831475	0	0	0	0	0	0	0	0	0	0	0	0	0.000131937	0.000106904	0.00439385	0.00204055	0.0660482	0.000230921	0.00157482	0	0	0	0	0	0	0	0	0.000375141	0	0	0	0	0
W3NLT1S2	0	1	0	3	Soils	2	0.000226893	0	0	0	0	0	0.00072378	0	0	0.000701162	0	0	0	0	0	0	0	0	0	0	0.000170409	0	2.78147e-05	0.000270448	0.00111157	0.000506102	0.0465884	0.000389459	0.001328	0	0	0	0	0	0	0	0	0.00126539	0	0.000210898	0	0	0
W3NLT2L1	0	1	0	3	Leaves	4	0	0	0	0	0	0	0	0	0	0	0	0	0	0	0	0	0	0	0	0	0	0	7.26395e-05	0	0	0	0.000303664	0	0	0	0	0	0	0	0	0	0	0	0	0	0	0	0
W3NLT2L2	0	1	0	3	Leaves	4	0	0	0	0	0	0	0	0	0	0	0	0	0	0	0	0	0	0	0	0	0	0	0.000134887	0	0	0.000245433	0.00112777	0	0	0	0	0	0	0	0	0	0	0	0	0	0	0	0
W3NLT2R1	0	1	0	3	Roots	4	0.000327563	0	0	0	0	0	0	0	0	0.00182207	0	0	0	0	0	0	0	0	0	0	0	0	0	0.000130148	0.000534919	0.000730654	0.0335177	0	0.00146611	0	0	0	0	0	0	0	0	0.000304471	0	0	0	0	0
W3NLT2R2	0	1	0	3	Roots	4	0.000891077	0	0	0	0	0	0.000379001	0	0	0.000917892	0	0.000186164	0	0	0	0	0	0	0	0.000201029	0	0	0.000109237	0.000118015	0	0	0.0385113	0	0.00122717	0	0	0	0	0	0	0	0	0	0	0	0	0	0
W3NLT2S1	0	1	0	3	Soils	4	0.000276155	0	0	0	0	0	0.00105711	0.000188336	0	0.00170679	0	0.000346166	0	0	0	0	0	0	0	0.000186903	0	0	0.000101561	0.000329167	0.00225484	0.000246394	0.0522219	0.000189607	0.0013311	0	0	0	0	0	0	0.000128344	0.000256687	0.00102675	0.000128344	0.000256687	0	0	0
W3NLT2S2	0	1	0	3	Soils	4	0.000608359	0.000297494	0	0.000351584	0	0	0.000388129	0	0	0.00188	0	0	0	0	0	0	0	0	0	0	0	0	7.45785e-05	0	0.00496734	0.000271398	0.0406859	0.000104424	0.00136145	0	0	0	0	0	0	0	0.000141368	0.00127231	0	0.000141368	0	0	0
W3NLT3L1	0	1	0	3	Leaves	16	0	0	0	0	0	0	0	0	0	0	0	0	0	0	0	0	0	0	0	0	0	0	0	0	0	0	0.000486643	0	0	0	0	0	0	0	0	0	0	0	0	0	0	0	0
W3NLT3L2	0	1	0	3	Leaves	16	0	0	0	0	0	0	0	0	0	0	0	0	0	0	0	0	0	0	0	0	0	0	0	0	0	0.000377191	0.00245536	0.000290259	0	0	0	0	0	0	0	0	0	0	0	0	0	0	0
W3NLT3R1	0	1	0	3	Roots	16	0.000352601	0	0	0	0	0	0.00112478	0	0.000223356	0.00152549	0	0	0	0	0	0	0	0	0	0	0.000264823	0	0.000259351	0.000140096	0.00287904	0.000314601	0.0312008	0.000121047	0.00115328	0	0	0	0	0	0	0	0	0.000327744	0	0	0	0	0
W3NLT3R2	0	1	0	3	Roots	16	0.000421179	0	0	0	0	0	0.000268709	0	0.000266797	0.0020825	0.000261219	0	0	0	0	0	0	0	0	0	0.000316329	0	0	0	0.00275119	0.000375789	0.0327364	0.000216885	0.000507533	0	0	0	0	0	0	0	0	0.000978719	0	0	0	0	0
W3NLT3S1	0	1	0	3	Soils	16	0.000509383	0	0	0	0	0	0.00162491	0.000173698	0	0.000157414	0.000157962	0	0	0	0	0	0	0	0	0	0.000191287	0	9.36676e-05	0.000101194	0.00291143	0	0.0438558	0.000437176	0.00140302	0	0	0	0	0	0	0	0	0.000946947	0.000236737	0	0	0.000118368	0
W3NLT3S2	0	1	0	3	Soils	16	0	0	0	0	0	0	0.000825551	0	0.000163935	0.000479852	0	0	0	0	0	0	0	0	0	0.000525465	0	0	3.17257e-05	0.00215933	0.0253573	0.000115453	0.0360745	8.88443e-05	0.00111378	0	0	0	0	0	0	0	0.000601381	0.0141926	0	0.00168387	0	0	0
W5GLCL1	0	0	1	5	Leaves	0	0	0	0	0	0	0	0	0	0	0	0	0	0	0	0	0	0	0	0	0	0	0	0	0	0	0.00173018	0.00916481	0.0029957	0	0	0	0	0	0	0	0	0	0	0	0	0	0	0
W5GLCL2	0	0	1	5	Leaves	0	0	0	0	0	0	0	0	0	0	0	0	0	0	0	0	0	0	0	0	0	0.00116062	0	0	0	0	0	0	0	0	0	0	0	0	0	0	0	0	0	0	0	0	0	0
W5GLCR1	0	0	1	5	Roots	0	0	0	0	0	0	0.000252026	0.000516698	0	0	0	0	0	0	0	0	0	0	0	0	0.00137033	0	0	0.000248207	0	0	0.00018065	0.0350712	0.000208523	0.000766801	0	0	0	0	0	0	0	0	0.000188197	0	0	0	0	0
W5GLCR2	0	0	1	5	Roots	0	0	0	0	0.000304995	0	0	0.00117844	0	0	0	0	0	0	0	0	0	0	0	0	0.00017859	0	0.000165385	0.000226436	0	0	0.000117718	0.0345734	0.000498228	0.00177157	0	0	0	0	0	0	0	0	0	0	0	0	0	0
W5GLCS1	0	0	1	5	Soils	0	0.000221252	0	0	0.000767198	0	0.000137702	0.00127041	0.000754461	0	0	0	0	0.000428075	0	0	0	0	0.000175035	0	0.000748723	0.000166172	0.000138672	0.000542464	0	0.000361311	0.000592223	0.0597924	0.000303821	0.00209483	0	0	0	0	0	0	0	0	0.000102827	0	0	0	0	0
W5GLCS2	0	0	1	5	Soils	0	0	0	0	0.000262527	0.000242091	0	0.000144907	0.000309802	0	0	0	0	0	0	0	0	0	0	0	0.00153723	0.000341174	0	0.000779625	0	0	0.000506631	0.0637865	0.000311893	0.00297158	0	0	0	0	0	0	0	0	0	0	0	0	0	0
W5GLT1L1	0	1	1	5	Leaves	0.25	0	0	0	0	0	0	0	0	0	0	0	0	0	0	0	0	0	0	0	0	0	0	0.000133427	0	0	0	0.000185927	0	0	0	0	0	0	0	0	0	0	0	0	0	0	0	0
W5GLT1L2	0	1	1	5	Leaves	0.25	0	0	0	0	0	0	0	0	0	0	0	0	0	0	0	0	0	0	0	0	0	0	0	0	0	0	8.92912e-05	0	0	0	0	0	0	0	0	0	0	0	0	0	0	0	0
W5GLT1R1	0	1	1	5	Roots	0.25	0.000255525	0	0	0	0	0	0.000815115	0.000522798	0	0	0	0	0	0	0	0	0	0	0	0	0	0.000480459	0.000187948	0	0	0.000227987	0.0438684	0.000394745	0.00171553	0	0	0	0	0	0	0	0	0	0	0	0	0	0
W5GLT1R2	0	1	1	5	Roots	0.25	0	0	0	0	0	0	0.00179858	0.000384525	0	0	0	0	0	0	0	0	0	0	0	0.000381601	0	0.000176692	0.000587512	0.00033603	0	0.000251531	0.0406934	0.00053229	0.00189269	0	0	0	0	0	0	0	0	0	0	0	0	0	0
W5GLT1S1	0	1	1	5	Soils	0.25	0	0	0	0	0.000133125	0	0.00111558	0.000340719	0	0	0	0	0	0	0	0	0	0	0	0.000338127	0	0.000313125	0.000398092	0	0.000407924	0.000445752	0.0524007	0.000600282	0.0025801	0	0	0	0	0	0	0	0	0	0	0	0	0	0
W5GLT1S2	0	1	1	5	Soils	0.25	0	0	0	0.00028285	0	0	0.00156125	0.000500677	0	0	0	0	0	0	0	0	0	0	0	0.000331247	0	0	0.00080998	0	0	0.000436681	0.0611581	0.000420048	0.00240122	0	0	0	0	0	0	0	0	0	0	0	0	0	0
W5GLT2L1	0	1	1	5	Leaves	4	0	0	0	0	0	0	0	0	0	0	0	0	0	0	0	0	0	0	0	0	0	0	0	0	0	0	0	0	0	0	0	0	0	0	0	0	0	0	0	0	0	0	0
W5GLT2L2	0	1	1	5	Leaves	4	0	0	0	0	0	0	0	0	0	0	0	0	0	0	0	0	0	0	0	0	0	0	0	0	0	0	4.51161e-05	0	0	0	0	0	0	0	0	0	0	0	0	0	0	0	0
W5GLT2R1	0	1	1	5	Roots	4	0	0	0	0.000683979	0.000157684	0	0.000943843	0.000201787	0	0	0	0	0	0	0	0	0	0	0	0.000200253	0	0	3.62716e-05	0	0	0.000527984	0.0324995	5.07873e-05	0.00198645	0	0	0	0	0	0	0	0	0.00013751	0	0	0	0	0
W5GLT2R2	0	1	1	5	Roots	4	0.000323506	0	0	0	0	0	0.000412789	0	0	0.000399889	0	0.000202761	0.000312957	0	0.000314667	0	0	0	0	0	0.000485941	0	0.000237951	0	0.00211318	0	0.0422209	0.000222118	0.00222762	0	0	0	0	0	0	0	0	0.00015035	0	0	0	0	0
W5GLT2S1	0	1	1	5	Soils	4	0	0	0	0	0	0	0.000973667	0.000297376	0	0.000134749	0	0	0	0	0	0	0	0	0	0.000442672	0	0	0.000213816	0	0	0.000194524	0.0582486	0.000486498	0.00270227	0	0	0	0	0	0	0	0	0.000202651	0	0	0	0	0
W5GLT2S2	0	1	1	5	Soils	4	0	0	0	0.00024055	0	0	0.000663884	0.000425801	0	0	0	0	0	0	0	0	0	0	0	0.000281709	0.000781534	0	0.000790899	0	0.000679719	0.000371375	0.0598688	0.00035723	0.00275865	0	0	0	0	0	0	0	0	9.67225e-05	0	0	0	0	0
W5GLT3L1	0	1	1	5	Leaves	64	0	0	0	0	0	0	0	0	0	0	0	0	0	0	0	0	0	0	0	0	0	0	0	0	0	0	0	0	0	0	0	0	0	0	0	0	0	0	0	0	0	0	0
W5GLT3L2	0	1	1	5	Leaves	64	0	0	0	0	0	0	0	0	0	0	0	0	0	0	0	0	0	0	0	0	0	0	0.000147904	0	0	0	0	0	0	0	0	0	0	0	0	0	0	0	0	0	0	0	0
W5GLT3R1	0	1	1	5	Roots	64	0	0	0	0.000890382	0	0	0.000491465	0	0	0.000476107	0	0	0	0	0	0	0	0	0	0.000782046	0	0	0.000802693	0	0.000628985	0.000171828	0.0348719	0.000330566	0.00145871	0	0	0	0	0	0	0	0	0	0	0	0	0	0
W5GLT3R2	0	1	1	5	Roots	64	0	0.000367945	0	0.00217422	0	0	0.000480043	0	0	0	0	0	0	0	0	0	0	0	0	0	0	0	0.000553438	0	0.000614367	0	0.0287272	0.000258306	0.00136004	0	0	0	0	0	0	0	0	0	0	0	0	0	0
W5GLT3S1	0	1	1	5	Soils	64	0.000246309	0	0	0	0	0	0.000785717	0.00100789	0	0	0	0	0	0	0	0	0	0	0	0	0	0	0.000815262	0	0.000804459	0.000329647	0.0568444	0.00097241	0.00258648	0	0	0	0	0	0	0	0	0	0	0	0	0	0
W5GLT3S2	0	1	1	5	Soils	64	0.000485425	0	0	0	0	0	0.00154849	0.000165528	0	0	0	0	0	0	0	0	0	0	0	0.000657077	0	0	0.000773604	9.64348e-05	0	0.000649666	0.0668358	0.000749904	0.00363505	0	0	0	0	0	0	0	0	0	0	0	0	0	0
W5NLCL1	0	0	0	5	Leaves	0	0	0	0	0	0	0	0	0	0	0	0	0	0	0	0	0	0	0	0	0	0	0	0	0	0	0	0	0	0	0	0	0	0	0	0	0	0	0	0	0	0	0	0
W5NLCL2	0	0	0	5	Leaves	0	0	0	0	0	0	0	0	0	0	0	0	0	0	0	0	0	0	0	0	0	0	0	0	0	0	0	0	0	0	0	0	0	0	0	0	0	0	0	0	0	0	0	0
W5NLCR1	0	0	0	5	Roots	0	0.000700393	0.000228333	0	0.000269848	0	0	0.000893691	0	0	0.00101006	0	0.000292652	0	0	0	0	0	0	0	0	0	0	0.000257582	0.000185521	0	0.00052076	0.052564	0.000160296	0.00233103	0	0	0	0	0	0	0	0	0	0	0	0	0	0
W5NLCR2	0	0	0	5	Roots	0	0.000455869	0	0	0	0	0	0.000581682	0	0	0.00112701	0	0	0	0	0	0	0	0	0	0	0	0	0.000223539	0	0.00111667	0.00020337	0.054356	3.91247e-05	0.00149105	0	0	0	0	0	0	0	0	0	0	0	0	0	0
W5NLCS1	0	0	0	5	Soils	0	0.000999744	0	0	0	0	0	0.000478372	0	0	0.00108132	0	0	0	0	0	0	0	0	0	0	0.000187716	0	9.19187e-05	0	0	0.000446001	0.0442325	0.000128704	0.00120472	0	0	0	0	0	0	0	0	0	0	0	0	0	0
W5NLCS2	0	0	0	5	Soils	0	0.000251491	0	0	0.000290684	0	0	0.000641798	0	0	0.000466306	0	0	0	0	0	0	0	0	0	0	0	0	3.08302e-05	0	0	0	0.0461831	0.000129504	0.000909162	0	0	0	0	0	0	0	0	0	0	0	0	0	0
W5NLT1L1	0	1	0	5	Leaves	0.25	0	0	0	0	0	0	0	0	0	0	0	0	0	0	0	0	0	0	0	0	0.00039409	0	6.43247e-05	0	0	0	0	0	0	0	0	0	0	0	0	0	0	0	0	0	0	0	0
W5NLT1L2	0	1	0	5	Leaves	0.25	0	0	0	0	0	0	0	0	0	0	0	0	0	0	0	0	0	0	0	0	0	0	0	0	0	0	0	0	0	0	0	0	0	0	0	0	0	0	0	0	0	0	0
W5NLT1R1	0	1	0	5	Roots	0.25	0	0.00053532	0	0	0	0	0	0	0.00034672	0.00304463	0.000339471	0	0	0	0	0	0	0	0	0.00037045	0	0	0.000201298	0	0.000893837	0.000488362	0.0477323	9.3952e-05	0.00174315	0	0	0	0	0	0	0	0	0	0	0	0	0	0
W5NLT1R2	0	1	0	5	Roots	0.25	0.00102028	0	0	0.000393097	0	0	0	0	0	0.00147138	0	0.000426316	0	0	0	0	0	0	0	0	0	0	0.000291844	0	0	0.000303443	0.0367172	0.000175131	0.00187348	0	0	0	0	0	0	0	0	0.00015806	0	0	0	0	0
W5NLT1S1	0	1	0	5	Soils	0.25	0.000575379	0	0	0	0	0	0.000183544	0	0.000182237	0.00106685	0	0	0	0	0	0	0	0	0	0	0	0	3.52677e-05	0	0.000469805	0.000385028	0.0433456	0.000197526	0.00133717	0	0	0	0	0	0	0	0	0	0.000133704	0	0	0	0
W5NLT1S2	0	1	0	5	Soils	0.25	0.000428219	0	0	0.000494954	0	0	0.000683001	0	0	0.000264663	0	0	0	0	0	0	0	0	0	0	0	0	2.62476e-05	0.000595492	0.00139859	0.000859657	0.0472187	0.000183758	0.00121632	0	0	0	0	0	0	0	0	0.000398031	0	0	0	0	0
W5NLT2L1	0	1	0	5	Leaves	4	0	0	0	0	0	0	0	0	0	0	0	0	0	0	0	0	0	0	0	0	0	0	0	0	0	0	0	0	0	0	0	0	0	0	0	0	0	0	0	0	0	0	0
W5NLT2L2	0	1	0	5	Leaves	4	0	0	0	0	0	0	0	0	0	0	0	0	0	0	0	0	0	0	0	0	0	0	0	0	0	0	0	0	0	0.000475324	0	0	0	0	0	0	0	0	0	0	0	0	0
W5NLT2R1	0	1	0	5	Roots	4	0.00215249	0	0	0	0	0.000446555	0.000686638	0	0.00022725	0.00177381	0	0	0	0	0	0	0	0	0	0	0.00026944	0	0.000351831	0.000285077	0	0	0.0280065	0	0.000741091	0	0	0	0	0	0	0	0	0.000166729	0	0	0	0	0
W5NLT2R2	0	1	0	5	Roots	4	0.00184538	0	0	0.000266622	0	0	0.000441503	0	0	0.00156825	0	0	0	0	0	0	0	0	0	0	0	0	5.65561e-05	0	0.000376695	0.000411627	0.0424389	0.000158379	0.001231	0	0	0	0	0	0	0.000107206	0	0.000428823	0	0	0	0	0
W5NLT2S1	0	1	0	5	Soils	4	0	0	0	0.00031653	0	0	0.000873577	0	0	0.000338511	0	0.000171639	0	0	0	0	0	0	0	0	0.000411355	0	3.35714e-05	0.000108807	0.00447207	0.000488678	0.0402783	4.70064e-05	0.00169714	0	0	0	0	0	0	0	0.000127273	0.00203637	0	0.000127273	0	0	0
W5NLT2S2	0	1	0	5	Soils	4	0.000506625	0.000247745	0	0.000292789	0	0	0.000323223	0	0	0.000469683	0	0	0	0	0	0	0	0	0	0	0	0	0.000155267	0.000704525	0.00620499	0.000113006	0.0324108	8.69616e-05	0.000523283	0	0	0	0	0	0	0	0.000235455	0.00235455	0.000117727	0.000117727	0	0	0
W5NLT3L1	0	1	0	5	Leaves	64	0	0	0	0	0	0	0	0	0	0	0	0	0	0	0	0	0	0	0	0	0	0	0	0	0	0	0	0	0	0	0	0	0	0	0	0	0	0	0	0	0	0	0
W5NLT3L2	0	1	0	5	Leaves	64	0	0	0	0	0	0	0	0	0	0	0	0	0	0	0	0	0	0	0	0	0	0	5.79656e-05	0	0	0	8.07735e-05	0	0	0	0	0	0	0	0	0	0	0	0	0	0	0	0
W5NLT3R1	0	1	0	5	Roots	64	0.00186341	0.000303742	0	0	0	0	0	0	0	0.00172753	0.000192617	0	0	0	0	0	0	0	0	0	0.000233253	0	0.000190362	0	0	0.000692745	0.0362351	0.000159926	0.00171083	0	0	0	0	0	0	0	0	0.000577348	0	0	0	0	0
W5NLT3R2	0	1	0	5	Roots	64	0.000829148	0	0	0.000319455	0	0	0	0	0.000175075	0.00307476	0	0	0	0	0	0	0	0	0	0	0	0	0.000542106	0.000878502	0	0.000123298	0.0393285	9.48816e-05	0.00128462	0	0	0	0	0	0	0	0.000128449	0.000128449	0	0	0	0	0
W5NLT3S1	0	1	0	5	Soils	64	0.00087407	0	0	0.000673526	0	0	0.000743534	0	0	0.00162067	0	0	0	0	0	0	0	0	0	0	0.000218825	0	7.14346e-05	0.000115762	0.00237897	0	0.0308581	5.00111e-05	0.00135422	0	0	0	0	0	0	0	0.000135409	0.00135409	0	0	0	0	0
W5NLT3S2	0	1	0	5	Soils	64	0.000511033	0	0	0.000295338	0	0	0.00114112	0	0.000161858	0.000947541	0	0	0	0	0.000248535	0	0	0	0	0	0.000767628	0	0.00059515	0.000203045	0.000834532	0.000683939	0.0392839	0.000131578	0.00149554	0	0	0	0	0	0	0	0	0.000950015	0	0	0	0	0
[truncated: 429 more columns]
