# Supplementary figures and images for: Temporal Dynamics Dominates Microbiome and Resistome Assembly Despite Tetracycline Pressure in a Germfree Lettuce Model
Source: Research Square preprint supplement (doi:10.21203/rs.3.rs-8401048/v1), 2025-12-24

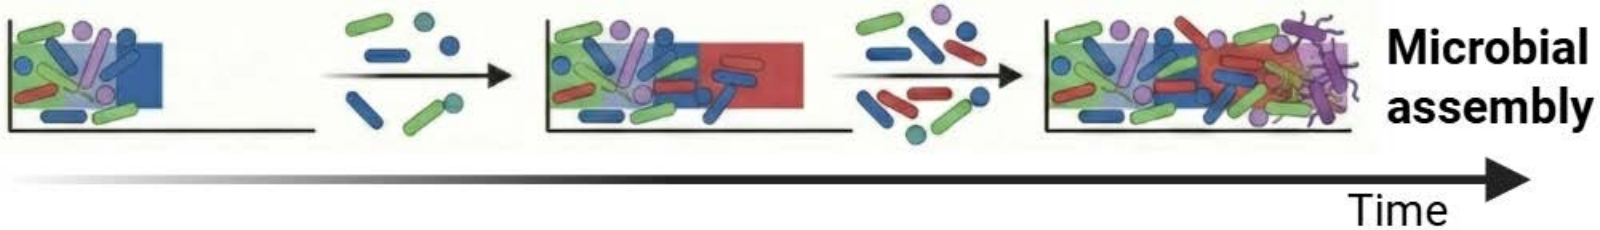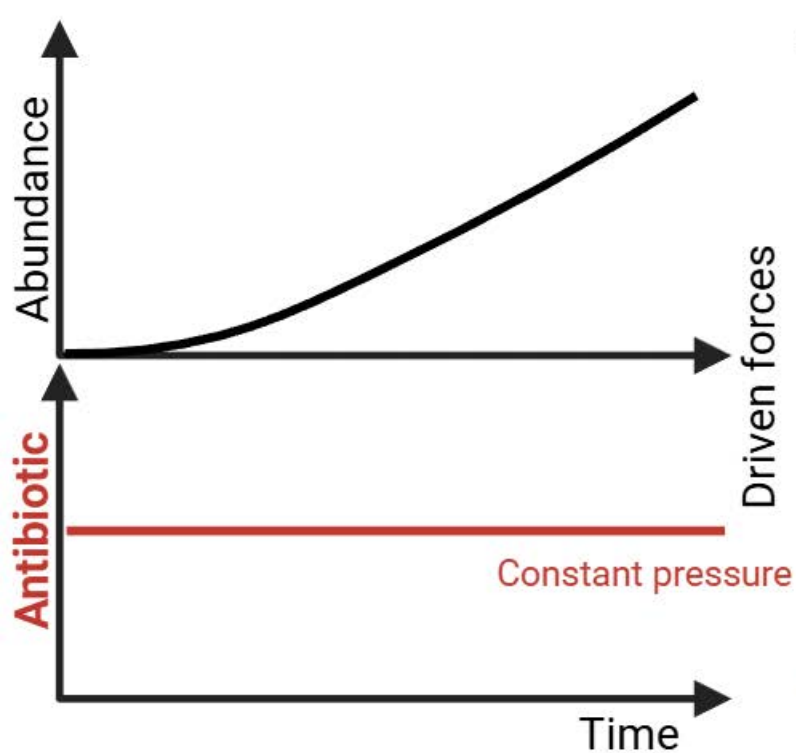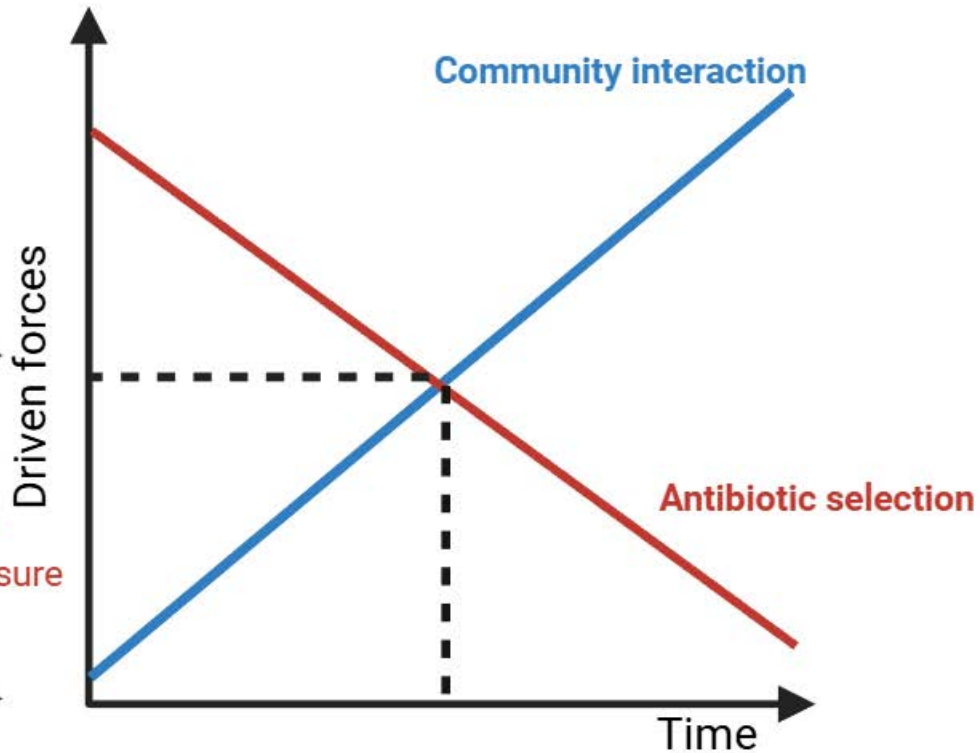

Supplement: Supplementary file 1 [file 2f825581ac75ca3e745ed2fc.pdf]
